# Supplementary material for: Transcriptomic Analysis Reveals JAK2/MPL-Independent Effects of Calreticulin Mutations in a C. elegans Model
Source: Cells. 2023 Jan 2;12(1):186. doi: 10.3390/cells12010186 (PMC9818371; doi:10.3390/cells12010186)
Supplement: Supplementary file 1 [file cells-12-00186-s001.zip]

Archive with 9 entries (9 files):
- Figures S1, S2, S3 and S4.pdf
- Table S1.xlsx
- Table S2.xlsx
- Table S3.xlsx
- Table S4.xlsx
- Table S5.xlsx
- Table S6.xlsx
- Table S7.xlsx
- Table S8.xlsx
