# Supplementary material for: Transcriptomic Analysis Reveals JAK2/MPL-Independent Effects of Calreticulin Mutations in a C. elegans Model
Source: Cells. 2023 Jan 2;12(1):186. doi: 10.3390/cells12010186 (PMC9818371; doi:10.3390/cells12010186)
Supplement: Supplementary file 1 [file cells-12-00186-s001.zip › Table S1.xlsx]

## Sheet: Hoja1
	Table S1. Summary of results obtained in the bioinformatic analyses of mutant forms of CALR and CRT-1.
			CALR(mut1) (c.1092_1143del)	CRT-1(mut1)	CALR(mut2) (c.1154_1155insTTGTC)	CRT-1(mut2)
	Length of exon (bp)		183 bp	342 pb	237 bp	354 pb
	Length of C-tail (aa)		352–411 (59 aa)	316 - 428 (113 aa)	352–430 (78 aa)	316 - 342 (117 aa)
	Length of pathogenic C-tail (aa)		367 - 411 (45 aa)	365 - 428 (64 aa)	385 - 430 (46 aa)	359 - 432 (74 aa)
	Low complexity regions (LCRs)	RepeatMasker	Simple repeat 361–389	t-LCR 374 - 391	t-LCR 361–408	t-LCR (373-395)
	Disordered regions (DRs)	PONDR RONN	356 - 402 Average strength: 0.9361	350 - 397 Average strength: 0.9456	356 - 421 Average strength: 0.8647	350 - 401 Average strength: 0.9485
		RaptorX	6% of total protein	6% of total protein	8% of total protein	6% of total protein
	Coiled coils	Raptor X	No coils	359 - 369 (11 aa)	351 - 396 (46 aa)	361 - 374 (14 aa)
		COILS
		PairCOILS
		PepCOILS
	Protein charge	CHARGE	Charge: - 14.5 Basic AA: 66 aa (0.1606 MF) Acidic AA: 77 aa (0.1874 MF)	Charge: - 3.5 Basic AA: 85 aa (0.1986 MF) Acidic AA: 83 aa (0.1939 MF)	Charge: - 20.5 Basic AA: 71 aa (0.1651 MF) Acidic AA: 88 aa (0.2046 MF)	Charge: - 2.5 Basic AA: 87 aa (0.2013 MF) Acidic AA: 84 aa (0.1944 MF)
		PEPINFO
		PEPSTATS
	Phosphorylation sites in the C-tail	NetPhos 2.0	Ser phospho-sites: 392, 399 Thr phospho-sites: 383, 398	Ser phospho-sites: 394, 403 Thr phospho-sites: 392	Ser phospho-sites: 411, 418 Thr phospho-sites: 402, 417	Ser phospho-sites: 398, 407 Thr phospho-sites: 364, 396
