# Supplementary material for: Transcriptomic Analysis Reveals JAK2/MPL-Independent Effects of Calreticulin Mutations in a C. elegans Model
Source: Cells. 2023 Jan 2;12(1):186. doi: 10.3390/cells12010186 (PMC9818371; doi:10.3390/cells12010186)
Supplement: Supplementary file 1 [file cells-12-00186-s001.zip › Table S2.xlsx]

## Sheet: Hoja1
	Table S2. Primers and probes used for qPCR analysis.
		Gene	Forward Primer (5' → 3')	Probe (5' → 3')	Reverse Primer (5' → 3')
	Cell cycle	tba-4	TGCATGCTCTCCAACACTAC	TCCGACGTACCAGTGAACAAAGGC	GTGAACTCTCCCTCTTCCATTC
		tbb-6	CAGGAACCACTCAAACGTATTTC	CCGTCGCAAAGCATTCCTTCATTGG	GTCAGTGAACTCCGACTCTTC
		mec-7	CGGACAATGCGGTAATCAAATC	TATCCGATGAACACGGCATTGACCC	AGATCAGAGTCTCCCACATACT
		mes-1	GATGTTGCCAAAGCGGATAATG	AGCCAACAATGGTGCTACTCATCCA	GTTGGAGCGTTGAAGGTGATA
	Extracellular matrix	col-156	ACGTGCTTTACGACAATGTTATG	ACGCCAATGATGCTTGGGACTCTA	GTCTTACTGGTTGGTTCATTGTG
		col-120	ACGAAGGCTGTTGGTTCAG	ACAAGCTGGATATGGAGCTTCTTCCC	TATGGAGATGGAGCTGGATGA
		col-98	TACCGGCTTCTAGCCTTCT	TCTGCGTTCTTTCCGTCGTTTCAGT	CTGAACTAGACGAACTCTCATTCC
		col-142	TTCTGGAAACGACGGAGTTC	CTACTGCCCATGTCCAGCTCGTTC	CTCTGGAACGAGCAGCAATA
	Signaling	mom-2	CAGCTTATGTGTACGCGATTTC	TGTGTCTCACTCGTTGGCTCGTG	CCAGATCCTTGTGGTGTTTCT
		grd-6	CTGAGGAAGTCACTCAAGGATATG	AGGAGGAAGCTGTTGAATTGCCGA	CTCACCACGACGACCATAATAG
		grl-16	TCTATCCAGGTGACCCAAGT	AAACTACCAAGCTCCACCAGAGCA	CTTCAGTCTCAGCGACGATTT
		qua-1	CGGATGGTTCATCAAATGGAAAG	AAGGTTGATCCAGCACCAGCTGAT	CGTCAAACTGTTCGGGTATCT
		wrt-4	TACGTGATGATCCTTTGGCTATT	AGCAGCAAGCAAGCTGTGAACAAG	GTCCTCTGGGTTGCATGATAA
		ptr-18	CCAAGCGGGAACTTCTACTATG	CCCTGGTTCATGCCTACATGGTTCA	AGATTACCAACACGACGACTTT
		ptc-3	GATGGGCTTGGTCCACTATTT	TATTCCTCTACTGCCTCTGCCTCGG	TCACGAGATCGGTTTCGATTG
		hog-1	GGAAGATGCTCGCTGTATCTG	ACGCGGAGTACGTCAAATACCTTCC	TAGACCACGTTTCGACCTTTG
		phg-1	GCACTGCTAGAGACGATCAAT	TGAAAGACAACTTGCTCGGAGTATGCT	TGTGATGGAGTTGTCGGATG
		hhat-1	GTTTGATTCGGGTAACTTTGTACTC	AAGGTGTGGAGAGAGTTTGACCGC	GAGCACAGATCGGGATGAAA
		egl-18	TGGATGCACTAACAGCACAG	CCTCCACCACATCTCCACCATCAT	CTTCGATGACCGCTTGTACTT
	Epigenetics	set-12	CCAGAAGGATGGACTACAGTTT	TGCACCACGGAGGAATGTAGCAAT	GGGACATTCGCGATGATTTG
	TFs and nuclear receptors	efl-1	CTCGACAATGAGCTTGACTTTG	CGTGTGCCCATTTGTGGTTGATCC	GCCAACAATCCCAACGATTTAT
		flh-3	CACAATCATCCACCACCAACTA	TCTCTCAATGGGCCTCAACAAACCA	GAGAAGTGATGGTGGCAATAGG
		nhr-2	TGCCAGGCTATCCAATGATAAA	TACAGAATCCGGCACAATGGACCC	GGTTGAGTTTGTTGCTGTTCC
