# Supplementary material for: Transcriptomic Analysis Reveals JAK2/MPL-Independent Effects of Calreticulin Mutations in a C. elegans Model
Source: Cells. 2023 Jan 2;12(1):186. doi: 10.3390/cells12010186 (PMC9818371; doi:10.3390/cells12010186)
Supplement: Supplementary file 1 [file cells-12-00186-s001.zip › Table S3.xlsx]

## Sheet: Hoja1
	Table S3. Results of microarray analysis when comparing CRT-1(mut1) vs WT
	ID	CRT-1(mut1) Avg (log2)	WT Avg (log2)	Fold Change	P-val	FDR P-val	Gene Symbol	Description
	18488051	6.21	8.75	-5.81	5.33e-10	8.14e-06	T06D8.3	hypothetical protein
	18556853	9.34	11.54	-4.61	1.72e-09	8.14e-06	pqn-74	Prion-like-(Q/N-rich)-domain-bearing protein
	18557521	8.21	11.81	-12.08	1.68e-09	8.14e-06	col-120	COLlagen
	18575180	4.43	6.52	-4.26	1.32e-09	8.14e-06	T06E4.14	hypothetical protein
	18587327	4.21	6.94	-6.64	9.53e-10	8.14e-06	pud-3	Protein Up-regulated in Daf-2(gf)
	18489178	3.95	6.66	-6.54	9.99e-10	8.14e-06	T25E4.1	hypothetical protein
	18594507	6.78	9.88	-8.54	4.84e-09	1.14e-05	R12A1.3	hypothetical protein
	18536954	5.54	7.56	-4.04	4.42e-09	1.14e-05	F20B10.3	hypothetical protein
	18596111	9.22	11.12	-3.74	4.42e-09	1.14e-05	pmp-5	Peroxisomal Membrane Protein related
	18476090	7.72	10.65	-7.62	5.65e-09	1.14e-05	Y48G8AL.16	hypothetical protein
	18481652	6.01	9	-7.92	5.62e-09	1.14e-05	F07H5.8	hypothetical protein
	18547893	5.89	9.08	-9.09	3.79e-09	1.14e-05	clec-52	C-type LECtin
	18566617	5.72	8.12	-5.3	4.98e-09	1.14e-05	cpt-5	Carnitine Palmitoyl Transferase
	18574918	9.19	6.14	8.3	6.01e-09	1.14e-05	tbb-6	TuBulin, Beta
	18632549	8.41	5.89	5.74	5.21e-09	1.14e-05	ceh-39	Homeobox protein ceh-39
	18454469	7.26	10.32	-8.37	6.96e-09	1.16e-05	col-60	COLlagen
	18543279	6.91	9.36	-5.49	6.91e-09	1.16e-05	pqn-76; abu-5; pqn-78	Prion-like-(Q/N-rich)-domain-bearing protein; Activated in Blocked Unfolded protein response
	18573737	8.19	11.14	-7.76	8.5e-09	1.28e-05	R02F11.1	hypothetical protein
	18550679	6.49	9.62	-8.72	1.1e-08	1.28e-05	D2096.6	hypothetical protein
	18575177	7.24	10.27	-8.19	1.16e-08	1.28e-05	pqn-63	Prion-like-(Q/N-rich)-domain-bearing protein
	18459361	7.66	10.99	-10.03	9.28e-09	1.28e-05	T10E9.3	hypothetical protein
	18478908	5.9	8.24	-5.06	1.11e-08	1.28e-05	C08E3.1	hypothetical protein
	18486262	8.11	11.4	-9.77	1.22e-08	1.28e-05	sdz-24	SKN-1 Dependent Zygotic transcript
	18582873	6.95	4.52	5.39	1.21e-08	1.28e-05	C06H2.7	hypothetical protein
	18589752	6.11	9.07	-7.82	1.08e-08	1.28e-05	grl-27	GRound-Like (grd related)
	18601602	6.42	9.27	-7.21	1.15e-08	1.28e-05	ugt-6	UDP-glucuronosyltransferase
	18611717	7.68	4.99	6.46	1.05e-08	1.28e-05	mes-1	Maternal Effect Sterile
	18625111	4.53	6.8	-4.82	1.43e-08	1.45e-05	F35A5.4	hypothetical protein
	18591546	5.54	10.11	-23.69	1.54e-08	1.51e-05	col-156	COLlagen
	18472371	8.74	11.32	-5.94	1.66e-08	1.57e-05	R12E2.7	hypothetical protein
	18501709	6.9	9.56	-6.33	1.96e-08	1.79e-05	R03C1.1	hypothetical protein
	18543282	5.47	7.84	-5.16	2.04e-08	1.81e-05
	18601975	5.8	8.31	-5.71	2.15e-08	1.85e-05	lron-2	eLRR (extracellular Leucine-Rich Repeat) ONly
	18506684	6.25	8.41	-4.45	2.37e-08	1.95e-05	ZC204.12	hypothetical protein
	18579057	7.76	9.18	-2.68	2.4e-08	1.95e-05	grsp-1	Glycine Rich Secreted Protein
	18633021	4.78	7.06	-4.88	2.54e-08	2e-05	Y102A11A.7	hypothetical protein
	18618113	5.95	8.16	-4.61	2.95e-08	2.08e-05	ZK662.2	hypothetical protein
	18561415	6.27	8.74	-5.53	2.83e-08	2.08e-05	pqn-2	Prion-like-(Q/N-rich)-domain-bearing protein
	18487953	7.38	5.67	3.27	3e-08	2.08e-05	T05H10.4	hypothetical protein
	18568457	6.73	4.71	4.05	2.95e-08	2.08e-05	F26G5.1	hypothetical protein
	18587972	5.78	8.13	-5.12	2.91e-08	2.08e-05	F21C10.9	hypothetical protein
	18591632	7.44	4.94	5.68	3.11e-08	2.1e-05	fbxa-192	F-box A protein
	18458679	3.69	6.67	-7.88	3.22e-08	2.13e-05	R12E2.14	hypothetical protein
	18568239	6.9	9.2	-4.9	3.93e-08	2.54e-05	asns-1	Asparagine synthetase
	18589254	8.24	10.55	-4.96	4.1e-08	2.59e-05	F35E12.5	hypothetical protein
	18506823	8.47	11.03	-5.88	4.46e-08	2.69e-05	abu-14	Activated in Blocked Unfolded protein response
	18486634	5.45	8.17	-6.62	4.42e-08	2.69e-05	M02G9.2	hypothetical protein
	18480145	8.59	10.88	-4.9	4.77e-08	2.82e-05	C30G12.2	hypothetical protein
	18618819	7.35	5.38	3.91	5.19e-08	3e-05	tag-52	Putative protein tag-52
	18606667	6.48	8.78	-4.93	5.53e-08	3.14e-05	C54D2.1	hypothetical protein
	18622280	4.95	7.6	-6.27	6.14e-08	3.42e-05	lgx-1	Lin-12 and Glp-1 X-hybridizing
	18620962	7.5	10.31	-7.05	6.62e-08	3.48e-05	lgc-21	Ligand-Gated ion Channel
	18595579	5.17	7.73	-5.92	6.6e-08	3.48e-05	T06E4.12	hypothetical protein
	18613159	6.9	5.01	3.71	6.67e-08	3.48e-05	K08H2.3	hypothetical protein
	18627561	6.56	8.66	-4.31	6.75e-08	3.48e-05	drd-5	dietary restriction down regulated
	18507925	10.33	8.27	4.19	6.97e-08	3.53e-05	ckb-2	Choline kinase B2
	18502392	8.09	10.56	-5.53	7.37e-08	3.61e-05	abu-11	Activated in Blocked Unfolded protein response
	18615564	6	8.7	-6.5	7.29e-08	3.61e-05	col-170	COLlagen
	18635443	10.38	8.78	3.04	7.66e-08	3.68e-05
	18553423	9.44	11.95	-5.67	8e-08	3.75e-05	col-104	COLlagen
	18478644	5.68	4.33	2.55	8.06e-08	3.75e-05	C05D12.2	hypothetical protein
	18533847	9.02	10.55	-2.89	8.3e-08	3.8e-05	C17H12.8	hypothetical protein
	18574047	8	10.3	-4.94	8.62e-08	3.82e-05	pqn-54	Prion-like-(Q/N-rich)-domain-bearing protein
	18468865	6.12	7.76	-3.1	8.59e-08	3.82e-05	F30F8.5	hypothetical protein
	18603195	7.3	9.89	-6.02	9.19e-08	3.84e-05	C06G1.1	hypothetical protein
	18543570	6.96	3.95	8.04	8.92e-08	3.84e-05	flh-3	FLYWCH zinc finger transcription factor homolog
	18560391	2.99	5.78	-6.88	9.06e-08	3.84e-05	pqn-90	Prion-like-(Q/N-rich)-domain-bearing protein
	18478611	9.68	11.95	-4.83	9.08e-08	3.84e-05	pho-11	Putative acid phosphatase 11
	18614535	6.57	4.91	3.17	9.59e-08	3.95e-05	R09A8.2	hypothetical protein
	18495737	7.35	8.64	-2.46	9.96e-08	4.04e-05	C44B7.11	Putative endoplasmic reticulum metallopeptidase 1-B
	18586880	7.75	11.22	-11.06	1.03e-07	4.13e-05	fat-7	Delta(9)-fatty-acid desaturase fat-7
	18499262	8.36	10.86	-5.69	1.09e-07	4.24e-05	msra-1	Methionine Sulfoxide Reductase A
	18592451	4.67	6.7	-4.08	1.08e-07	4.24e-05	K01D12.9	hypothetical protein
	18635583	7.75	5.76	3.96	1.27e-07	4.87e-05
	18453349	10.88	12.42	-2.93	1.38e-07	5.03e-05	acdh-1	Acyl CoA DeHydrogenase
	18595414	9.54	11.37	-3.54	1.38e-07	5.03e-05	T05E12.6	hypothetical protein
	18494685	5.08	7.23	-4.42	1.38e-07	5.03e-05	C18E9.7	hypothetical protein
	18586012	9.71	11.47	-3.39	1.4e-07	5.03e-05	ttr-44	TransThyretin-Related family domain
	18630323	7.29	6.11	2.27	1.38e-07	5.03e-05	R07E4.5	hypothetical protein
	18534521	6.75	10.03	-9.67	1.52e-07	5.25e-05	C30H6.5	hypothetical protein
	18623658	6.5	7.8	-2.46	1.52e-07	5.25e-05	otpl-3	OToPetrin-Like
	18633764	7.21	5.52	3.23	1.49e-07	5.25e-05	ZC53.1	hypothetical protein
	18476075	10.66	12.45	-3.46	1.6e-07	5.48e-05	Y48G8AL.12	hypothetical protein
	18551393	6.52	4.43	4.24	1.72e-07	5.82e-05	his-31	Histone H4
	18613758	6.93	9.67	-6.7	1.83e-07	6.08e-05	M153.1	hypothetical protein
	18502360	4.49	6.52	-4.09	1.86e-07	6.08e-05	T01B7.8	hypothetical protein
	18595432	6.75	4.42	5.02	1.86e-07	6.08e-05	pzf-1	Paired Zinc Finger protein
	18579916	7.13	8.68	-2.93	1.91e-07	6.17e-05	abu-4	Activated in Blocked Unfolded protein response
	18523094	9.23	11.71	-5.58	2.04e-07	6.5e-05	col-91	Putative cuticle collagen 91
	18540716	8.34	10.64	-4.91	2.06e-07	6.5e-05	trx-3	ThioRedoXin [see also xtr]
	18538697	7.06	5.04	4.05	2.35e-07	6.79e-05	drd-50	dietary restriction down regulated
	18589942	7.46	10.11	-6.3	2.28e-07	6.79e-05	F41F3.3	hypothetical protein
	18492437	6.56	5.16	2.63	2.32e-07	6.79e-05	ZK673.1	hypothetical protein
	18539225	7.04	8.61	-2.97	2.34e-07	6.79e-05	clec-67	C-type LECtin
	18578973	5.45	7.15	-3.26	2.23e-07	6.79e-05	Y43F8B.3	hypothetical protein
	18604143	4.79	6.31	-2.87	2.25e-07	6.79e-05	C17G1.1	hypothetical protein
	18622488	5.02	6.79	-3.4	2.21e-07	6.79e-05	nspc-17	Nematode Specific Peptide family, group C
	18631357	8.08	6.37	3.29	2.23e-07	6.79e-05	nfya-1	Nuclear transcription Factor Y, A (alpha) subunit
	18510959	9.78	6.94	7.12	2.41e-07	6.9e-05	col-98	COLlagen
	18546366	8.21	10.45	-4.73	2.53e-07	7.1e-05	bli-6	BLIstered cuticle
	18495865	5.13	3.58	2.92	2.52e-07	7.1e-05	C46E10.8	hypothetical protein
	18567233	5.65	8.12	-5.55	2.7e-07	7.29e-05	pud-4	Protein Up-regulated in Daf-2(gf)
	18516242	8.54	11.64	-8.6	2.65e-07	7.29e-05	col-88	COLlagen
	18568976	7.47	6.07	2.64	2.69e-07	7.29e-05	best-14	Bestrophin homolog 14
	18629185	5.39	3.93	2.75	2.69e-07	7.29e-05	set-12	Histone-lysine N-methyltransferase
	18486839	6.65	4.42	4.67	2.96e-07	7.86e-05	M151.3	hypothetical protein
	18624199	3.11	5.77	-6.34	2.94e-07	7.86e-05	abu-2	Activated in Blocked Unfolded protein response
	18533086	11.22	10.05	2.24	3.08e-07	8.03e-05	lip-1	Lateral-signal-Induced Phosphatase
	18606355	6.86	4.27	6.01	3.07e-07	8.03e-05	C49F5.6	hypothetical protein
	18476583	9.29	11.88	-6.01	3.25e-07	8.37e-05	grl-16	GRound-Like (grd related)
	18453693	5.03	7.7	-6.39	3.27e-07	8.37e-05	D2092.8	hypothetical protein
	18587205	6.34	4	5.08	3.35e-07	8.4e-05	F14H3.3	hypothetical protein
	18491386	7.51	6.35	2.23	3.37e-07	8.4e-05	sinh-1	Stress-activated map kinase-interacting protein 1 homolog
	18589884	6.2	8.02	-3.53	3.37e-07	8.4e-05	F41E6.11	hypothetical protein
	18576006	8.7	11.15	-5.44	3.5e-07	8.43e-05	grd-6	GRounDhog (hedgehog-like family)
	18492914	7.72	6.51	2.31	3.49e-07	8.43e-05	B0304.4	hypothetical protein
	18621635	8.2	9.52	-2.5	3.45e-07	8.43e-05	ifp-1	Intermediate filament protein ifp-1
	18630081	5.84	4.14	3.24	3.46e-07	8.43e-05	R04D3.2	hypothetical protein
	18484302	9.56	11.14	-2.99	3.61e-07	8.47e-05	tba-4	TuBulin, Alpha
	18527221	10.43	11.7	-2.41	3.62e-07	8.47e-05	ech-6	Probable enoyl-CoA hydratase, mitochondrial
	18584428	5.84	8.42	-5.98	3.64e-07	8.47e-05	ech-1.1	Enoyl-CoA Hydratase
	18618965	8.89	10.16	-2.42	3.63e-07	8.47e-05	scav-1	SCAVenger receptor (CD36 family) related
	18596755	6.84	8.36	-2.87	3.75e-07	8.56e-05	T21C9.9	hypothetical protein
	18467409	8.77	7.48	2.44	3.71e-07	8.56e-05	inx-14	Innexin-14
	18510048	4.7	6.15	-2.72	3.77e-07	8.56e-05	C40H1.8	hypothetical protein
	18629144	6.64	3.99	6.3	3.88e-07	8.74e-05	K09E3.7	hypothetical protein
	18587219	6.69	4.7	3.98	3.92e-07	8.75e-05	F14H3.5	hypothetical protein
	18606732	7.03	5.63	2.64	3.98e-07	8.83e-05	C55B6.1	hypothetical protein
	18610838	6.79	4.99	3.47	4.17e-07	8.93e-05	F47G3.3	hypothetical protein
	18457672	7.04	5.83	2.32	4.17e-07	8.93e-05	ulp-5	Ubiquitin-Like Protease
	18550608	8.7	7.6	2.15	4.16e-07	8.93e-05	D1046.2	hypothetical protein
	18553377	8.98	10.74	-3.39	4.28e-07	8.93e-05	lys-4	LYSozyme
	18568985	5.36	8.57	-9.25	4.22e-07	8.93e-05	col-152	COLlagen
	18581627	6.45	8.53	-4.22	4.23e-07	8.93e-05	abu-1	Activated in Blocked Unfolded protein response
	18587135	6.56	4.81	3.37	4.25e-07	8.93e-05	F14D7.2	hypothetical protein
	18611572	6.03	7.24	-2.32	4.07e-07	8.93e-05	F53H8.3	hypothetical protein
	18560527	5.66	7.74	-4.21	4.31e-07	8.93e-05	Y94H6A.10	hypothetical protein
	18561405	6.33	8.99	-6.34	4.37e-07	9e-05
	18564092	9.03	10.27	-2.36	4.47e-07	9.05e-05	C29F3.7	hypothetical protein
	18616430	9.59	10.8	-2.32	4.46e-07	9.05e-05	nep-22	NEPrilysin metallopeptidase family
	18614769	6.88	9.02	-4.39	4.57e-07	9.14e-05	grd-14	GRounDhog (hedgehog-like family)
	18490455	6.93	8.39	-2.75	4.55e-07	9.14e-05	spds-1	SPermiDine Synthase
	18517626	5.94	8.46	-5.74	4.64e-07	9.15e-05	Y47D3B.6	hypothetical protein
	18519200	4.46	6.62	-4.49	4.64e-07	9.15e-05	ZC21.3	hypothetical protein
	18548568	5.77	7.06	-2.45	4.7e-07	9.19e-05	C08F11.13	hypothetical protein
	18507015	8.17	10.38	-4.62	4.83e-07	9.38e-05	ZK1307.1	hypothetical protein
	18459640	10.68	9.66	2.01	5.03e-07	9.55e-05	lst-1	Lateral Signaling Target
	18495241	7.16	5.41	3.36	4.98e-07	9.55e-05	fbxc-32	F-box C protein
	18539603	8	6.75	2.37	5.04e-07	9.55e-05	H04M03.3	hypothetical protein
	18620658	7.3	8.45	-2.21	5.05e-07	9.55e-05	C28G1.5	hypothetical protein
	18497340	9.81	11.85	-4.1	5.13e-07	9.57e-05	col-73	COLlagen
	18531521	6.49	9.5	-8.06	5.26e-07	9.57e-05	col-97	COLlagen
	18550966	8.1	10.82	-6.58	5.14e-07	9.57e-05	col-130	COLlagen
	18465957	6.85	4.34	5.68	5.39e-07	9.57e-05	nhr-2	Nuclear hormone receptor family member nhr-2
	18481512	7.16	5.38	3.43	5.29e-07	9.57e-05	EEED8.3	hypothetical protein
	18482671	7.66	5.44	4.65	5.53e-07	9.57e-05	F19B10.5	hypothetical protein
	18486863	6.92	4.52	5.27	5.48e-07	9.57e-05	M151.7	hypothetical protein
	18497532	5.12	3.8	2.5	5.53e-07	9.57e-05	F14D2.15	hypothetical protein
	18528749	5.92	7.49	-2.95	5.5e-07	9.57e-05	Y1A5A.1	hypothetical protein
	18566718	8.73	10.74	-4.05	5.43e-07	9.57e-05	F10A3.4	hypothetical protein
	18580224	6.05	4.46	3.01	5.41e-07	9.57e-05	ztf-25	Zinc finger putative Transcription Factor family
	18587550	5.79	6.94	-2.21	5.46e-07	9.57e-05	F17C11.12	hypothetical protein
	18615401	6.7	4.74	3.89	5.34e-07	9.57e-05	lsd-1	Lysine-Specific histone Demethylase homolog
	18623937	6.79	8.26	-2.78	5.19e-07	9.57e-05	F16F9.4	hypothetical protein
	18555112	9.63	8.58	2.07	5.59e-07	9.61e-05	wapl-1	WAPL (Drosophila Wings APart-Like cohesin interactor)
	18467576	8.96	11.32	-5.15	5.66e-07	9.68e-05	F10D11.6	hypothetical protein
	18570777	9.55	11.35	-3.47	5.71e-07	9.7e-05	F53F1.4	hypothetical protein
	18458199	6.42	8.27	-3.61	5.84e-07	9.87e-05	K12C11.3	hypothetical protein
	18619236	6.34	9.22	-7.36	5.97e-07	9.95e-05	C05E7.2	hypothetical protein
	18484797	6.16	5.05	2.16	5.99e-07	9.95e-05	F52H3.4	hypothetical protein
	18575114	7.17	8.84	-3.18	5.97e-07	9.95e-05	T06A1.5	hypothetical protein
	18629461	8.48	10.25	-3.39	6.11e-07	0.0001	asns-2	ASparagiNe Synthetase
	18595609	5.97	8.14	-4.51	6.15e-07	0.0001	T06E4.8	hypothetical protein
	18628851	8.05	10.42	-5.18	6.25e-07	0.0001	dao-3	Dauer or Aging adult Overexpression
	18471685	9.12	11.61	-5.61	6.43e-07	0.0001	col-65	COLlagen
	18501178	7.88	9.95	-4.21	6.55e-07	0.0001	cpg-7	Chondroitin proteoglycan 7
	18551642	9.78	10.96	-2.27	6.6e-07	0.0001	pcp-3	Prolyl Carboxy Peptidase like
	18582341	5.9	8.23	-5.01	6.66e-07	0.0001	C02E7.7	hypothetical protein
	18575610	4.9	7.66	-6.78	6.85e-07	0.0001	clec-47	C-type LECtin
	18464209	5.63	4.2	2.69	6.97e-07	0.0001	clec-97	C-type LECtin
	18545113	6.89	8.36	-2.78	6.97e-07	0.0001	Y54G2A.45	hypothetical protein
	18557156	6.79	8.62	-3.56	6.93e-07	0.0001	Y105C5A.13; Y105C5A.12	hypothetical protein
	18480434	10.03	12.03	-4.01	7.32e-07	0.0001	tag-297	hypothetical protein
	18606946	5.01	7.27	-4.78	7.41e-07	0.0001	E01G6.1	hypothetical protein
	18575832	9.17	11.68	-5.71	7.27e-07	0.0001	col-157	COLlagen
	18536463	7.57	9.87	-4.92	7.42e-07	0.0001	F08G5.6	hypothetical protein
	18552037	7	5.54	2.76	7.44e-07	0.0001	F32E10.5	hypothetical protein
	18621274	6.32	4.14	4.52	7.39e-07	0.0001	fbxa-170	F-box A protein
	18454463	9.85	8.75	2.15	7.54e-07	0.0001	F21F3.7	hypothetical protein
	18497931	5.77	4.11	3.17	7.58e-07	0.0001	sea-1	T-box transcription factor 18
	18475964	8.99	7.64	2.54	7.69e-07	0.0001	mbtr-1	Malignant brain tumor repeat protein 1
	18623082	9	10.27	-2.4	7.69e-07	0.0001	F09B12.3	Putative phospholipase B-like 2
	18571247	6.08	7.89	-3.52	7.73e-07	0.0001	F56A4.3	hypothetical protein
	18630051	4.78	6.62	-3.58	7.8e-07	0.0001	R04B3.3	hypothetical protein
	18481429	8.84	10.32	-2.8	8.04e-07	0.0001	cut-4	CUTiclin
	18616896	6.89	5.14	3.35	7.9e-07	0.0001	W06D11.1	hypothetical protein
	18622486	4.78	7.1	-5	7.96e-07	0.0001	nspc-18	Nematode Specific Peptide family, group C
	18622594	8.15	6.27	3.67	8e-07	0.0001	E02H4.6	hypothetical protein
	18627016	7.6	5.49	4.33	8.01e-07	0.0001	meg-3	hypothetical protein
	18560836	9.79	11.92	-4.37	8.23e-07	0.0001	ZK180.5	hypothetical protein
	18544421	5.64	8.16	-5.77	8.31e-07	0.0001	col-115	COLlagen
	18466497	7.79	8.99	-2.31	8.29e-07	0.0001	fhod-1	Formin HOmology Domain
	18476427	7.86	6.82	2.06	8.15e-07	0.0001	ztf-23	Zinc finger putative Transcription Factor family
	18483470	7.46	8.77	-2.47	8.32e-07	0.0001	F35C11.4	hypothetical protein
	18524645	9.13	7.75	2.61	8.25e-07	0.0001	ztf-1	Zinc finger transcription factor family protein 1
	18481901	8.12	6.9	2.33	8.38e-07	0.0001	pch-2	Putative pachytene checkpoint protein 2
	18582663	7.69	6.6	2.13	8.48e-07	0.0001	C04F5.9	hypothetical protein
	18615398	5.67	3.63	4.12	8.62e-07	0.0001
	18473381	7.04	5.8	2.35	8.65e-07	0.0001	T22C1.4	hypothetical protein
	18511895	6.64	7.78	-2.2	8.67e-07	0.0001	F42A10.9	hypothetical protein
	18585678	6.92	5.83	2.13	8.68e-07	0.0001	C53A5.16	hypothetical protein
	18564014	9.11	8.1	2.02	8.92e-07	0.0001	lig-1	DNA ligase 1
	18588557	5.05	6.76	-3.27	9.04e-07	0.0001	F26F12.4	hypothetical protein
	18472362	9.38	11.96	-5.96	9.31e-07	0.0001	R12E2.15	hypothetical protein
	18588389	5.21	6.49	-2.42	9.36e-07	0.0001	slc-17.8	SLC (SoLute Carrier) homolog
	18593243	7.96	9.85	-3.69	9.5e-07	0.0001	odc-1	Ornithine decarboxylase
	18605568	7.15	5.75	2.63	9.61e-07	0.0001	meg-4	hypothetical protein
	18628482	7.65	4.86	6.9	9.65e-07	0.0001	meg-2	hypothetical protein
	18627311	7.39	6.21	2.26	9.72e-07	0.0001	csb-1	human CSB (Cockayne Syndrome B) homolog
	18537191	7.83	9	-2.25	9.98e-07	0.0001	atgp-1	Amino acid Transporter GlycoProtein subunit
	18600049	8.06	6.78	2.42	1.03e-06	0.0001	Y50D4C.6	hypothetical protein
	18613669	9.52	11.01	-2.8	1.04e-06	0.0001	dhs-28	DeHydrogenases, Short chain
	18588591	7.85	10.46	-6.11	1.07e-06	0.0001	F26F2.10	hypothetical protein
	18460564	9	7.79	2.32	1.07e-06	0.0001	W04A8.6	hypothetical protein
	18623015	7.2	4.73	5.55	1.08e-06	0.0001	inx-2	Innexin-2
	18562051	7.86	9.76	-3.73	1.1e-06	0.0001	C02E7.6	hypothetical protein
	18565969	8.66	7.51	2.21	1.1e-06	0.0001	him-5	High Incidence of Males (increased X chromosome loss)
	18598293	9.42	8.3	2.17	1.1e-06	0.0001	efl-1	E2F-like (mammalian transcription factor)
	18620203	8.32	9.52	-2.3	1.1e-06	0.0001	ugt-23	UDP-glucuronosyltransferase
	18475690	8.35	10.75	-5.25	1.12e-06	0.0001	Y47G6A.15	hypothetical protein
	18457472	7.47	6.23	2.36	1.13e-06	0.0001	hus-1	human HUS1 related
	18485924	9.16	7.67	2.8	1.13e-06	0.0001	tdc-1	Tyrosine decarboxylase
	18601944	10.51	11.87	-2.57	1.13e-06	0.0001	ZK6.11	hypothetical protein
	18617831	6.24	7.4	-2.23	1.12e-06	0.0001	set-30	SET (trithorax/polycomb) domain containing
	18472635	5.22	3.96	2.38	1.14e-06	0.0001	T04D3.1	hypothetical protein
	18630129	7.48	8.89	-2.66	1.15e-06	0.0001	ifd-1	Intermediate filament protein ifd-1
	18458712	7.09	8.38	-2.45	1.16e-06	0.0001	inx-16	Innexin-16
	18575870	8.66	10.05	-2.62	1.19e-06	0.0001	T15B7.1	hypothetical protein
	18602543	6.63	9.03	-5.29	1.2e-06	0.0001	adt-1	ADAMTS family
	18529043	8.2	9.57	-2.59	1.21e-06	0.0001	Y37D8A.16	hypothetical protein
	18540287	5.5	6.7	-2.3	1.2e-06	0.0001	K07H8.5	hypothetical protein
	18560642	8.26	7.13	2.18	1.2e-06	0.0001	mans-4	alpha-1,2-Mannosidase
	18466869	5.11	7.27	-4.5	1.22e-06	0.0001	C54G4.4	hypothetical protein
	18569727	9.35	10.67	-2.5	1.22e-06	0.0001	aqp-4	AQuaPorin or aquaglyceroporin related
	18492634	7.74	8.99	-2.38	1.24e-06	0.0001	lact-2	Beta-lactamase domain-containing protein 2
	18532223	8.53	7.33	2.29	1.25e-06	0.0001	ZK688.9	TIP41-like protein
	18633148	8.13	6.79	2.53	1.24e-06	0.0001	ekl-5	hypothetical protein
	18571305	5.87	4.58	2.44	1.29e-06	0.0001	F57A10.4	hypothetical protein
	18609313	8.45	6.37	4.2	1.28e-06	0.0001	F31B9.3	hypothetical protein
	18542252	7.6	5.43	4.51	1.32e-06	0.0001	cav-1	Caveolin
	18582416	9.72	11.62	-3.74	1.34e-06	0.0001	abu-6	Activated in Blocked Unfolded protein response
	18464121	8.08	9.7	-3.08	1.35e-06	0.0001	ptr-23	PaTched Related family
	18622354	8.08	7.06	2.02	1.36e-06	0.0002	tag-294	hypothetical protein
	18624803	7.38	6.23	2.23	1.38e-06	0.0002	F28C10.3	hypothetical protein
	18569293	8.12	6.98	2.2	1.39e-06	0.0002	ztf-28	Zinc finger putative Transcription Factor family
	18566958	8.89	10.5	-3.05	1.41e-06	0.0002	bcl-11	mammalian BCL (B cell lymphoma) gene homologs
	18612320	6.96	4.88	4.23	1.41e-06	0.0002	ttr-42	TransThyretin-Related family domain
	18493867	7.35	8.5	-2.21	1.43e-06	0.0002	math-4	MATH (meprin-associated Traf homology) domain containing
	18467264	5.52	7.56	-4.12	1.46e-06	0.0002	pqn-26	Prion-like-(Q/N-rich)-domain-bearing protein
	18498023	8.52	7.25	2.42	1.46e-06	0.0002	F22D3.5	hypothetical protein
	18523746	9.02	7.83	2.27	1.46e-06	0.0002	evl-18	hypothetical protein
	18631349	8.11	9.22	-2.17	1.46e-06	0.0002	spp-4	SaPosin-like Protein family
	18611326	7.1	6.07	2.03	1.47e-06	0.0002	F52D2.7	hypothetical protein
	18465047	8.24	6.66	3	1.49e-06	0.0002	C04F12.1	hypothetical protein
	18588857	4.92	3.53	2.62	1.49e-06	0.0002	F29G9.7	hypothetical protein
	18621920	7.06	8.09	-2.04	1.5e-06	0.0002	cdd-1	CytiDine Deaminase
	18563297	9.1	10.56	-2.76	1.52e-06	0.0002	asp-10	ASpartyl Protease
	18503713	5.1	7.64	-5.81	1.53e-06	0.0002	nas-27	Zinc metalloproteinase nas-27
	18550457	9.09	11.62	-5.79	1.55e-06	0.0002	col-138	COLlagen
	18453316	8.8	7.61	2.28	1.55e-06	0.0002	glh-2	ATP-dependent RNA helicase glh-2
	18593828	8.4	7.29	2.16	1.54e-06	0.0002	R02F11.4	hypothetical protein
	18602379	6.69	5.17	2.87	1.55e-06	0.0002	vang-1	VANG (Van Gogh/Strabismus planar polarity protein) homolog
	18501892	8.89	10.26	-2.58	1.58e-06	0.0002	tts-2	ncRNA
	18497465	8.63	11.15	-5.72	1.62e-06	0.0002	F13H8.5	hypothetical protein
	18499587	8.27	7.02	2.37	1.61e-06	0.0002	F46C5.1	hypothetical protein
	18584870	8.91	7.39	2.87	1.6e-06	0.0002	C37C3.9	hypothetical protein
	18615536	4	6.33	-5.02	1.63e-06	0.0002	col-168	COLlagen
	18621016	4.82	7.06	-4.72	1.62e-06	0.0002	C34E11.2	hypothetical protein
	18551505	7.53	6.42	2.16	1.64e-06	0.0002	F20C5.3	hypothetical protein
	18627960	5.95	4.92	2.04	1.66e-06	0.0002	F59D12.5	hypothetical protein
	18481012	5.14	7.37	-4.67	1.67e-06	0.0002	C56C10.4	hypothetical protein
	18458105	7.42	5.64	3.44	1.69e-06	0.0002	taf-11.2	TAF (TBP-associated transcription factor) family
	18460593	8.33	9.54	-2.31	1.69e-06	0.0002	haf-4	HAlF transporter (PGP related)
	18505176	5.99	7.38	-2.63	1.68e-06	0.0002	Y38F1A.8	hypothetical protein
	18516793	6.81	5.77	2.06	1.68e-06	0.0002	orc-4	ORC (Origin Recognition Complex) subunit
	18484237	6.31	3.43	7.34	1.7e-06	0.0002	F43G6.10	hypothetical protein
	18525231	6.27	8.88	-6.14	1.71e-06	0.0002	H10E21.4	hypothetical protein
	18472072	9.31	8.15	2.24	1.73e-06	0.0002	M04F3.5	hypothetical protein
	18482844	7.66	5.69	3.93	1.73e-06	0.0002	F22E5.17	hypothetical protein
	18585144	6.48	4.98	2.84	1.72e-06	0.0002	C45H4.14	hypothetical protein
	18602239	8.89	9.96	-2.11	1.74e-06	0.0002	B0272.3	Probable 3-hydroxyacyl-CoA dehydrogenase B0272.3
	18480548	7.13	5.76	2.58	1.75e-06	0.0002	C41H7.3	hypothetical protein
	18629588	5.64	7.35	-3.27	1.75e-06	0.0002	M153.2	hypothetical protein
	18558023	8.3	10.9	-6.03	1.8e-06	0.0002	col-109	COLlagen
	18556780	8.62	9.98	-2.57	1.84e-06	0.0002	T28F3.8	hypothetical protein
	18569753	5.76	3.21	5.84	1.84e-06	0.0002	F40G12.11	hypothetical protein
	18569519	11.26	9.45	3.51	1.85e-06	0.0002	mom-2	Protein mom-2
	18496450	5.43	4.06	2.59	1.85e-06	0.0002	dmsr-4	DroMyoSuppressin Receptor related
	18529027	8.33	7.28	2.08	1.88e-06	0.0002	cec-7	C.Elegans Chromodomain protein
	18529034	9.28	7.86	2.68	1.9e-06	0.0002	unc-71	hypothetical protein
	18571050	7.09	5.75	2.54	1.92e-06	0.0002	F55A11.8	hypothetical protein
	18453143	8.63	7.48	2.22	1.94e-06	0.0002	C50F2.2	hypothetical protein
	18505656	6.33	5.08	2.38	1.93e-06	0.0002	clec-145	C-type LECtin
	18607679	7.64	8.69	-2.06	1.96e-06	0.0002	F11C1.5	hypothetical protein
	18611315	7.93	6.39	2.91	2.03e-06	0.0002	F52D2.12; F52D2.6	hypothetical protein
	18523691	6.62	8.09	-2.77	2.06e-06	0.0002	F28F5.6	hypothetical protein
	18505159	9.35	10.62	-2.42	2.07e-06	0.0002	Y38F1A.6	Probable hydroxyacid-oxoacid transhydrogenase, mitochondrial
	18506271	9.08	10.14	-2.08	2.08e-06	0.0002	ctl-2	Peroxisomal catalase 1
	18582419	9.96	11.8	-3.58	2.09e-06	0.0002	abu-7	Activated in Blocked Unfolded protein response
	18466522	4.84	7	-4.46	2.12e-06	0.0002	phat-1	PHAryngeal gland Toxin-related
	18453993	7.8	8.89	-2.13	2.12e-06	0.0002	pes-7	Patterned Expression Site
	18492884	8.04	10.13	-4.28	2.1e-06	0.0002	B0286.3	Phosphoribosylaminoimidazole carboxylase
	18528124	6.22	4.81	2.67	2.12e-06	0.0002	T24C4.2	hypothetical protein
	18578512	8.09	7.05	2.05	2.12e-06	0.0002	fbxa-210	F-box A protein
	18484400	5.11	3.81	2.46	2.13e-06	0.0002	btb-6	BTB (Broad/complex/Tramtrack/Bric a brac) domain protein
	18616902	7.94	5.41	5.75	2.15e-06	0.0002	W06D11.3	hypothetical protein
	18554249	8.89	10.02	-2.18	2.22e-06	0.0002	K08D8.6	hypothetical protein
	18562774	9.32	8	2.49	2.22e-06	0.0002	cpg-4	Chondroitin proteoglycan 4
	18598228	7.94	6.65	2.45	2.21e-06	0.0002	W09D12.1	hypothetical protein
	18624603	8.86	10.45	-3.02	2.21e-06	0.0002	ifd-2	Intermediate filament protein ifd-2
	18518462	6.36	7.63	-2.41	2.25e-06	0.0002	Y66D12A.13	hypothetical protein
	18465867	8	9.86	-3.61	2.27e-06	0.0002	sem-2	hypothetical protein
	18530398	8.47	9.8	-2.53	2.27e-06	0.0002	Y56A3A.7; mir-8211	hypothetical protein; ncRNA
	18489154	5.46	4.45	2.02	2.29e-06	0.0002	T25D3.3	hypothetical protein
	18617793	6.03	4.24	3.44	2.32e-06	0.0002	dot-1.5	Histone-lysine N-methyltransferase, H3 lysine-79 specific
	18503247	10.17	9.16	2.01	2.33e-06	0.0002	T12C9.7	hypothetical protein
	18585365	8.35	5.99	5.14	2.33e-06	0.0002	C50E3.11	hypothetical protein
	18483668	8.62	7.62	2	2.36e-06	0.0002	zfp-2	Zinc Finger Protein
	18563197	6.93	7.95	-2.04	2.36e-06	0.0002	hex-2	HEXosaminidase
	18604404	5.78	7.5	-3.31	2.38e-06	0.0002	C23H4.3	hypothetical protein
	18610456	4.41	6.17	-3.38	2.39e-06	0.0002	col-174	COLlagen
	18481543	6.59	8.75	-4.46	2.44e-06	0.0002	F01D5.6	hypothetical protein
	18466529	6.21	8.13	-3.77	2.46e-06	0.0002	phat-2	PHAryngeal gland Toxin-related
	18579402	6	8.68	-6.37	2.46e-06	0.0002
	18555643	7.32	5.35	3.92	2.45e-06	0.0002	T04A11.1; T04A11.4	hypothetical protein
	18555654	7.32	5.35	3.92	2.45e-06	0.0002	T04A11.1; T04A11.4	hypothetical protein
	18601095	7.56	6.49	2.09	2.45e-06	0.0002	Y97E10AR.3	hypothetical protein
	18632586	7.12	8.65	-2.89	2.45e-06	0.0002	cgr-1	CRAL/TRIO and GOLD domain suppressor of activated Ras
	18481211	8.71	10.43	-3.3	2.49e-06	0.0002	pyr-1	PYRimidine biosynthesis
	18462176	9.47	7.77	3.26	2.5e-06	0.0002	Y48G1A.2	hypothetical protein
	18598528	8.79	10.15	-2.57	2.51e-06	0.0002	pcp-4	Prolyl Carboxy Peptidase like
	18545574	6.42	8.07	-3.15	2.56e-06	0.0002	Y57G11C.42	hypothetical protein
	18629818	6.29	8.85	-5.92	2.56e-06	0.0002	R02E4.3	hypothetical protein
	18521153	6.06	4.81	2.38	2.55e-06	0.0002	bath-15	BTB and MATH domain-containing protein 15
	18573672	8.32	9.55	-2.33	2.56e-06	0.0002	cpz-2	CathePsin Z
	18585112	9.5	8.47	2.04	2.56e-06	0.0002	pak-2	Serine/threonine-protein kinase pak-2
	18534810	10.8	12.55	-3.36	2.67e-06	0.0002	col-107	COLlagen
	18463648	5.83	7.41	-2.99	2.67e-06	0.0002	nas-30	Zinc metalloproteinase nas-30
	18517498	7.87	6.85	2.03	2.65e-06	0.0002	mcm-10	yeast MCM (licensing factor) related
	18579399	7.62	6.2	2.67	2.66e-06	0.0002	skr-7	SKp1 Related (ubiquitin ligase complex component)
	18596461	7.49	10.07	-5.99	2.7e-06	0.0002	T19A5.3	hypothetical protein
	18485564	6.08	8.52	-5.44	2.69e-06	0.0002	F59B10.3	hypothetical protein
	18462391	11.41	9.55	3.63	2.73e-06	0.0002	Y51F10.2	hypothetical protein
	18613096	4.42	6.56	-4.42	2.75e-06	0.0002	K07E3.9	hypothetical protein
	18555847	8.08	9.28	-2.29	2.75e-06	0.0002	kgb-1	GLH-binding kinase 1
	18575473	9.83	10.93	-2.15	2.75e-06	0.0002	T08H10.1	hypothetical protein
	18592262	7.01	9.83	-7.08	2.76e-06	0.0002	H23N18.5	hypothetical protein
	18489229	7.47	9.14	-3.18	2.8e-06	0.0002	slc-36.2	SLC (SoLute Carrier) homolog
	18617964	7.99	6.84	2.21	2.83e-06	0.0002	ZK402.3	hypothetical protein
	18452507	10.3	9.17	2.19	2.85e-06	0.0002	imp-1	IntraMembrane Protease (IMPAS) family
	18485698	9.02	7.93	2.13	2.86e-06	0.0002	gbas-1	Ga Binding and Activating and Spk (SPK) domain containing
	18602839	6.21	7.61	-2.64	2.91e-06	0.0002	C04A11.1	hypothetical protein
	18618858	7.19	5.83	2.58	2.9e-06	0.0002	C02F12.8	hypothetical protein
	18576780	7.41	8.7	-2.44	2.97e-06	0.0002	T25F10.3	hypothetical protein
	18594733	10.37	9.09	2.43	2.99e-06	0.0002	cdt-2	CDT (S. pombe CDC10 Dependent Transcript) homolog
	18473971	9.94	8.94	2.01	3.01e-06	0.0002	pri-2	DNA PRImase homolog
	18509439	3.21	5.87	-6.35	3.02e-06	0.0002	C29F9.2	hypothetical protein
	18499462	6.48	5.16	2.49	3.03e-06	0.0002	ceh-83	C. Elegans Homeobox
	18526222	9.43	7.93	2.85	3.06e-06	0.0002	egg-2	EGG sterile (unfertilizable)
	18472367	5.82	8.17	-5.1	3.07e-06	0.0002	R12E2.6	hypothetical protein
	18625016	7.93	5.42	5.72	3.09e-06	0.0002	F31F6.1	hypothetical protein
	18451973	10.37	9.29	2.12	3.11e-06	0.0002	C25A1.1	hypothetical protein
	18532049	7.78	5.46	5.01	3.11e-06	0.0002	cdc-25.3	M-phase inducer phosphatase cdc-25.3
	18602314	7.31	5.77	2.9	3.13e-06	0.0002	nhx-1	Sodium/hydrogen exchanger
	18466118	10.45	9.22	2.35	3.19e-06	0.0002	C36B1.11	hypothetical protein
	18490928	8.07	6.44	3.1	3.17e-06	0.0002	Y51H7C.3	hypothetical protein
	18530388	8.58	10.03	-2.73	3.19e-06	0.0002	Y56A3A.6	hypothetical protein
	18582396	4.38	6.01	-3.08	3.17e-06	0.0002	abu-8	Activated in Blocked Unfolded protein response
	18539581	8.77	7.18	3.02	3.24e-06	0.0002	cyp-31A2	CYtochrome P450 family
	18505530	9.48	8.29	2.28	3.25e-06	0.0002	jmjd-2	Lysine-specific demethylase 4
	18505048	9.67	7.94	3.32	3.26e-06	0.0002	Y38E10A.14	hypothetical protein
	18548494	8.84	10.39	-2.92	3.27e-06	0.0002	swt-3	Sugar transporter SWEET
	18590720	8.11	7.04	2.1	3.31e-06	0.0002	vha-18	Probable V-type proton ATPase subunit H 1
	18565114	9.67	8.54	2.19	3.32e-06	0.0002	C50B6.3	hypothetical protein
	18485538	8.08	6.91	2.24	3.37e-06	0.0002	F59A6.5	hypothetical protein
	18464231	8.78	10.22	-2.72	3.44e-06	0.0002	haf-9	HAlF transporter (PGP related)
	18512707	11.5	10.4	2.14	3.44e-06	0.0002	F56C9.3	hypothetical protein
	18538909	8.55	7.13	2.67	3.42e-06	0.0002	egl-18	hypothetical protein
	18576999	9.22	11.22	-4	3.42e-06	0.0002	hsp-16.48; hsp-16.49	Heat shock protein Hsp-16.48/Hsp-16.49
	18578308	11.21	12.56	-2.56	3.41e-06	0.0002
	18592394	8.71	6.51	4.6	3.4e-06	0.0002	cdr-4	CaDmium Responsive
	18597334	9.22	11.22	-4	3.42e-06	0.0002
	18621174	8.6	10.99	-5.25	3.46e-06	0.0002	col-175	COLlagen
	18534767	4.65	6.63	-3.92	3.46e-06	0.0002	nas-8	Zinc metalloproteinase nas-8
	18533414	9.14	10.25	-2.16	3.5e-06	0.0002	ugt-22	UDP-glucuronosyltransferase
	18569790	5.38	7.17	-3.46	3.51e-06	0.0002	cyp-33C5	CYtochrome P450 family
	18625034	7.98	5.47	5.68	3.48e-06	0.0002	F31F6.2	hypothetical protein
	18457542	8.34	7.09	2.38	3.55e-06	0.0002	H31G24.3	hypothetical protein
	18533625	12.08	10.9	2.26	3.55e-06	0.0002	oma-1	hypothetical protein
	18582764	6.18	8.25	-4.19	3.57e-06	0.0002	cyp-35C1	CYtochrome P450 family
	18535282	7.87	9.84	-3.92	3.59e-06	0.0002	col-14	COLlagen
	18475219	5.49	7.86	-5.15	3.62e-06	0.0002	Y18H1A.9	hypothetical protein
	18587679	9.67	11.41	-3.33	3.65e-06	0.0002	F19B2.5	hypothetical protein
	18629301	10.87	11.89	-2.02	3.65e-06	0.0002	asp-14	ASpartyl Protease
	18546291	9.4	8.28	2.19	3.69e-06	0.0002	htp-2	Him-Three Paralog
	18571800	4.68	6.41	-3.32	3.72e-06	0.0002	asp-8	ASpartyl Protease
	18454813	6.21	8.29	-4.24	3.75e-06	0.0002	col-58	COLlagen
	18536706	8.29	7.14	2.23	3.77e-06	0.0002	F13G11.3	hypothetical protein
	18486426	9.05	7.59	2.75	3.79e-06	0.0002	clec-88	C-type LECtin
	18537796	5.96	7.24	-2.44	3.81e-06	0.0002	F36H1.11	hypothetical protein
	18478092	4.49	5.75	-2.39	3.93e-06	0.0002	B0334.6	hypothetical protein
	18500266	8.07	6.79	2.42	3.91e-06	0.0002	btb-19	BTB (Broad/complex/Tramtrack/Bric a brac) domain protein
	18528508	7.21	8.3	-2.13	3.94e-06	0.0002	W06F12.2	hypothetical protein
	18596532	10.14	8.66	2.8	3.94e-06	0.0002	dvc-1	SprT-like domain-containing protein Spartan
	18631811	5.98	8.09	-4.32	3.93e-06	0.0002	cdf-2	Cation Diffusion Facilitator family
	18632541	7.3	5.65	3.15	3.92e-06	0.0002	ceh-21	Homeobox protein ceh-21
	18476569	5.37	7.04	-3.18	3.98e-06	0.0002	Y65B4BL.6	hypothetical protein
	18561435	6.22	7.6	-2.59	4e-06	0.0002	ugt-1	UDP-GlucuronosylTransferase
	18577358	7.02	5.5	2.87	4.07e-06	0.0002	clec-218	C-type LECtin
	18484064	8.51	7.49	2.04	4.03e-06	0.0002	F42A8.3	hypothetical protein
	18571252	5.35	6.87	-2.86	4.06e-06	0.0002	F56A4.4; Y45G12C.3	hypothetical protein
	18579195	5.35	6.87	-2.86	4.06e-06	0.0002	F56A4.4; Y45G12C.3	hypothetical protein
	18591501	9.77	8.73	2.06	4.05e-06	0.0002	sun-1	Sun domain-containing protein 1
	18500653	7.76	6.58	2.27	4.13e-06	0.0003	fbf-1	Fem-3 mRNA-binding factor 1
	18472519	8.48	9.88	-2.64	4.17e-06	0.0003	dhs-3	DeHydrogenases, Short chain
	18500038	10.2	9.05	2.22	4.17e-06	0.0003	F54D10.5	hypothetical protein
	18594950	4.83	6.22	-2.63	4.16e-06	0.0003	T02B5.3	Carboxylic ester hydrolase
	18496561	9.74	10.76	-2.04	4.18e-06	0.0003	E01G4.3; mir-4929	hypothetical protein; ncRNA
	18532461	6.76	8.64	-3.66	4.2e-06	0.0003	faah-2	Fatty Acid Amide Hydrolase homolog
	18582103	4.42	3.3	2.18	4.2e-06	0.0003	fbxa-153	F-box A protein
	18561801	7.19	5.44	3.36	4.22e-06	0.0003	B0507.3	hypothetical protein
	18631594	6.27	7.99	-3.3	4.23e-06	0.0003	T13G4.4	hypothetical protein
	18481309	6.82	8.54	-3.31	4.25e-06	0.0003	DH11.2	hypothetical protein
	18582922	6.6	8.08	-2.79	4.27e-06	0.0003	ugt-17	UDP-GlucuronosylTransferase
	18506450	7.71	8.89	-2.26	4.29e-06	0.0003	daf-22	Non-specific lipid-transfer protein-like 2
	18589917	5.39	3.69	3.26	4.31e-06	0.0003	F41E6.15	hypothetical protein
	18616860	7.84	6.83	2.03	4.32e-06	0.0003	W05H9.4	hypothetical protein
	18515076	4.72	6.55	-3.55	4.36e-06	0.0003	T02C1.1	Uncharacterized RING finger protein T02C1.1
	18559757	7.74	6.57	2.25	4.38e-06	0.0003	dmd-9	DM (Doublesex/MAB-3) Domain family
	18561662	10.38	9.09	2.45	4.38e-06	0.0003	acly-2	ATP-citrate synthase
	18525269	7.73	6.73	2.01	4.4e-06	0.0003	cic-1	Cyclin-C
	18556993	8.67	7.52	2.22	4.41e-06	0.0003	pig-1	Maternal embryonic leucine zipper kinase
	18600465	6.17	8.03	-3.64	4.47e-06	0.0003	Y5H2A.5	ncRNA
	18574887	4.12	6.17	-4.13	4.45e-06	0.0003	lrx-1	LRP X(cross)-hybridizing
	18554285	9.34	8.32	2.03	4.48e-06	0.0003	eak-7	Enhancer of AKt-1 null
	18634076	7.59	8.6	-2.01	4.46e-06	0.0003	nck-1	NCK (Non-Catalytic region of tyrosine Kinase) adaptor protein family
	18542538	3.39	5.2	-3.51	4.49e-06	0.0003	T23F6.1	hypothetical protein
	18456843	8.25	7.24	2.01	4.56e-06	0.0003	slx-1	Structure-specific endonuclease subunit SLX1 homolog
	18513001	11.21	9.71	2.83	4.55e-06	0.0003	zif-1	Zinc finger-interacting factor 1
	18628514	6.77	7.89	-2.17	4.56e-06	0.0003	K02E10.6	hypothetical protein
	18496792	9.28	10.48	-2.3	4.58e-06	0.0003	pho-1	intestinal acid PHOsphatase
	18523225	4.55	6.62	-4.21	4.62e-06	0.0003	pqn-29	Prion-like-(Q/N-rich)-domain-bearing protein
	18493059	8.99	7.82	2.25	4.66e-06	0.0003	B0432.8	hypothetical protein
	18586626	8.57	5.8	6.8	4.76e-06	0.0003	F08F3.6	hypothetical protein
	18471546	10.97	9.71	2.39	4.79e-06	0.0003	egg-6	Leucine-rich repeat-containing protein egg-6
	18498238	7.12	8.41	-2.44	4.8e-06	0.0003	F27E5.3	hypothetical protein
	18543615	9.96	8.55	2.66	4.8e-06	0.0003	Y11D7A.7; Y11D7A.21	hypothetical protein; ncRNA
	18492525	9.91	11.8	-3.71	4.86e-06	0.0003	ZK84.1	hypothetical protein
	18468592	6.95	5.79	2.24	4.82e-06	0.0003	nmat-2	Nicotinamide/nicotinic acid mononucleotide adenylyltransferase 2
	18547573	6.81	4.95	3.63	4.84e-06	0.0003	tbx-36	Putative T-box protein 36
	18604953	7.86	9.65	-3.47	4.85e-06	0.0003	C29F7.2	hypothetical protein
	18557177	7.02	4.85	4.52	4.89e-06	0.0003	Y105C5A.8	hypothetical protein
	18527786	7.42	9.82	-5.29	4.92e-06	0.0003	T17H7.7	hypothetical protein
	18575986	6.72	9.36	-6.22	4.91e-06	0.0003	T16G1.2	hypothetical protein
	18633916	8.26	9.56	-2.48	4.95e-06	0.0003	dve-1	hypothetical protein
	18462778	7.25	6.21	2.05	4.97e-06	0.0003	let-49	Mediator of RNA polymerase II transcription subunit 7
	18583919	7.07	8.29	-2.32	5.01e-06	0.0003	ugt-48	Putative UDP-glucuronosyltransferase ugt-48
	18570960	8.83	9.85	-2.02	5.02e-06	0.0003	nid-1	NIDogen (basement membrane protein)
	18459842	8.92	7.51	2.67	5.04e-06	0.0003	gna-2	Glucosamine phosphate N-Acetyl transferase
	18465139	8.22	7.21	2.01	5.07e-06	0.0003	rnf-1	RiNg Finger protein
	18477054	9.56	8.48	2.11	5.08e-06	0.0003	rcor-1	RCOR (REST CO-Repressor) homolog
	18502140	7.64	6.45	2.28	5.19e-06	0.0003	R12C12.5	hypothetical protein
	18518405	7.39	6.27	2.18	5.21e-06	0.0003	ceh-91	C. Elegans Homeobox
	18488633	7.49	8.83	-2.53	5.23e-06	0.0003	agxt-1	Serine--pyruvate aminotransferase
	18608626	7.37	9.75	-5.19	5.26e-06	0.0003	pes-8	Patterned Expression Site
	18598762	8.96	7.95	2.01	5.26e-06	0.0003	mes-4	Histone-lysine N-methyltransferase mes-4
	18628330	6.55	5.01	2.91	5.27e-06	0.0003	H29C22.1	hypothetical protein
	18473952	7.12	8.45	-2.53	5.29e-06	0.0003	lbp-5	Fatty acid-binding protein homolog 5
	18479405	6.87	5.59	2.43	5.32e-06	0.0003	C16C8.12	hypothetical protein
	18517212	6.92	4.98	3.84	5.3e-06	0.0003	Y41C4A.11	hypothetical protein
	18523865	10.38	9.35	2.05	5.31e-06	0.0003	bath-41	BTB and MATH domain-containing protein 41
	18534110	4.87	7.01	-4.43	5.37e-06	0.0003	C26B2.8	hypothetical protein
	18485597	7.88	6.84	2.05	5.4e-06	0.0003	zyg-1	Probable serine/threonine-protein kinase zyg-1
	18499163	10.23	7.69	5.79	5.38e-06	0.0003	F42A8.1	hypothetical protein
	18625934	7.8	8.87	-2.09	5.39e-06	0.0003	tag-343	hypothetical protein
	18622607	7.54	8.66	-2.17	5.43e-06	0.0003	mrp-3	hypothetical protein
	18510144	7.68	6.66	2.03	5.48e-06	0.0003	C45G9.2	Uncharacterized tRNA-dihydrouridine synthase-like protein C45G9.2
	18521804	7.77	6.42	2.54	5.52e-06	0.0003	C27F2.7	Uncharacterized F-box protein C27F2.7
	18603456	8.08	9.1	-2.03	5.52e-06	0.0003	clc-1	CLaudin-like in Caenorhabditis
	18488915	9.58	8.38	2.3	5.56e-06	0.0003	dpl-1	Transcription factor dpl-1
	18562596	3.96	5.27	-2.49	5.56e-06	0.0003	fbxa-157	F-box A protein
	18501661	4.62	6.62	-4.01	5.68e-06	0.0003	col-77	COLlagen
	18457330	5.61	6.74	-2.18	5.68e-06	0.0003	F59C6.11	hypothetical protein
	18500149	6.63	4.55	4.23	5.65e-06	0.0003	F54D5.5	hypothetical protein
	18560277	4.97	3.49	2.79	5.69e-06	0.0003	Y73F4A.3	hypothetical protein
	18592490	7.18	8.96	-3.44	5.69e-06	0.0003	K02E11.7	hypothetical protein
	18626238	8.12	6.2	3.8	5.7e-06	0.0003	F46F2.3	hypothetical protein
	18608850	10.26	8.66	3.04	5.72e-06	0.0003	mrp-4	hypothetical protein
	18459176	9.53	8.27	2.39	5.76e-06	0.0003	pigv-1	GPI mannosyltransferase pigv-1
	18495027	6.33	7.43	-2.15	5.85e-06	0.0003	C27H5.4	hypothetical protein
	18571589	4.28	5.46	-2.27	5.9e-06	0.0003	F58E6.13	hypothetical protein
	18459649	6.16	7.18	-2.03	6.03e-06	0.0003	set-18	SET (trithorax/polycomb) domain containing
	18517082	8.9	7.45	2.74	6.04e-06	0.0003	pqn-82	Prion-like-(Q/N-rich)-domain-bearing protein
	18613318	8.16	9.37	-2.31	6.02e-06	0.0003	pbo-4	Na(+)/H(+) exchanger protein 7
	18610381	5.96	7.26	-2.47	6.1e-06	0.0003	F45E1.4	hypothetical protein
	18516529	8.49	7.44	2.06	6.12e-06	0.0003	orc-3	ORC (Origin Recognition Complex) subunit
	18525134	8.32	7.29	2.05	6.14e-06	0.0003	H04D03.2	hypothetical protein
	18627287	4.78	5.91	-2.18	6.14e-06	0.0003	F53B3.3	hypothetical protein
	18490151	6.41	4.67	3.34	6.18e-06	0.0003	sri-40	Serpentine Receptor, class I
	18510464	5.39	7.32	-3.8	6.26e-06	0.0003	D2045.8	hypothetical protein
	18587902	8.88	9.88	-2.01	6.26e-06	0.0003	F20G2.2	hypothetical protein
	18475981	8.67	6.77	3.72	6.27e-06	0.0003
	18470418	9.28	10.38	-2.14	6.36e-06	0.0003	apm-1	AdaPtin, Mu/medium chain (clathrin associated complex)
	18472652	6.33	4.63	3.23	6.36e-06	0.0003	T04D3.5	hypothetical protein
	18571184	8.68	7.47	2.31	6.35e-06	0.0003	capg-2	CAP-G condensin subunit
	18543113	6.68	8.54	-3.61	6.43e-06	0.0003	W08E12.5; W08E12.4	hypothetical protein
	18582685	7.37	6.3	2.09	6.41e-06	0.0003	C05C8.5	hypothetical protein
	18530551	8.22	9.34	-2.17	6.48e-06	0.0003	pbo-1	hypothetical protein
	18572283	10.05	11.29	-2.37	6.48e-06	0.0003	K03B8.6	hypothetical protein
	18577206	8.4	9.96	-2.94	6.48e-06	0.0003	T28H10.3	hypothetical protein
	18622556	5.58	6.75	-2.26	6.48e-06	0.0003	flp-20	FMRF-Like Peptide
	18575030	4.32	3.16	2.24	6.52e-06	0.0003	T05E12.10	ncRNA
	18472384	6.76	7.89	-2.19	6.55e-06	0.0003	inx-15	Innexin
	18577279	8.57	7.08	2.8	6.56e-06	0.0003	dgtr-1	DGAT (acyl-CoA:DiacylGlycerol AcylTransferase) Related
	18458043	8.47	10.99	-5.74	6.6e-06	0.0003	col-49	COLlagen
	18459513	8.03	9.1	-2.11	6.67e-06	0.0003	T19B4.3	Adenine phosphoribosyltransferase
	18515383	8.83	9.95	-2.16	6.7e-06	0.0003	T07E3.4	hypothetical protein
	18587213	6.25	5.06	2.29	6.72e-06	0.0003	F14H3.4	hypothetical protein
	18486620	5.37	7.56	-4.54	6.76e-06	0.0003	M02G9.1	hypothetical protein
	18493664	7.39	9.25	-3.64	6.8e-06	0.0003	nas-7	Zinc metalloproteinase nas-7
	18553258	10.98	8.64	5.04	6.81e-06	0.0003	col-103	COLlagen
	18520749	10.23	11.38	-2.22	6.84e-06	0.0003	mel-32	Serine hydroxymethyltransferase
	18461431	8.66	7.48	2.27	6.88e-06	0.0003	pif-1	ATP-dependent DNA helicase PIF1
	18541928	7.26	6.13	2.18	6.98e-06	0.0003	zim-1	Zinc finger In Meiosis
	18492165	8.56	5.51	8.29	7.01e-06	0.0003	ZK177.1	hypothetical protein
	18632868	4.47	6.35	-3.66	7.02e-06	0.0003	W04G3.7	hypothetical protein
	18623647	8.45	9.55	-2.15	7.09e-06	0.0003	F14B8.6	hypothetical protein
	18483062	5.41	7.94	-5.75	7.17e-06	0.0003	phg-1	Growth arrest-specific protein 1 homolog
	18528133	6.48	8.23	-3.37	7.32e-06	0.0003	T24C4.4	hypothetical protein
	18523371	8.29	6.74	2.92	7.28e-06	0.0003	polk-1	DNA polymerase kappa
	18532400	9.88	8.78	2.14	7.27e-06	0.0003	B0035.6	hypothetical protein
	18532863	7.81	6.33	2.79	7.24e-06	0.0003	fem-3	FEMinization of XX and XO animals
	18558601	10.07	8.46	3.06	7.26e-06	0.0003	fbxa-215	F-box A protein
	18623122	5.35	7	-3.14	7.31e-06	0.0003	F09C8.1	hypothetical protein
	18631392	8.71	9.83	-2.17	7.27e-06	0.0003	acdh-10	Probable medium-chain specific acyl-CoA dehydrogenase 10, mitochondrial
	18556504	5.18	6.85	-3.18	7.33e-06	0.0003	T22D1.11	hypothetical protein
	18514466	7.79	10.02	-4.68	7.37e-06	0.0003	R07E5.4	hypothetical protein
	18479992	10.56	9.2	2.56	7.38e-06	0.0003	C27D9.1	hypothetical protein
	18521843	8.7	7.57	2.18	7.49e-06	0.0003	C28A5.1	hypothetical protein
	18558673	8.89	7.02	3.64	7.5e-06	0.0003	Y4C6A.3	hypothetical protein
	18576993	9.33	11.11	-3.44	7.52e-06	0.0003	hsp-16.1; hsp-16.11	Heat shock protein Hsp-16.1/Hsp-16.11
	18585377	6.68	5.57	2.15	7.52e-06	0.0003	C50E3.13	hypothetical protein
	18600069	9.51	8.4	2.16	7.48e-06	0.0003	unc-61	hypothetical protein
	18625208	8.14	6.76	2.61	7.5e-06	0.0003	chtl-1	Choline transporter-like protein 1
	18452059	5.06	7.7	-6.25	7.55e-06	0.0003	nas-36	Zinc metalloproteinase nas-36
	18536454	4.69	5.98	-2.46	7.56e-06	0.0003	ugt-65	UDP-GlucuronosylTransferase
	18456490	12.03	11	2.04	7.63e-06	0.0003	mex-3	Muscle EXcess
	18474920	9.18	8.07	2.15	7.65e-06	0.0003	Y106G6H.6	hypothetical protein
	18504941	7.95	6.17	3.43	7.64e-06	0.0003	Y25C1A.14	hypothetical protein
	18624172	5.49	7.29	-3.49	7.66e-06	0.0003	F19C6.5	hypothetical protein
	18556105	7.8	5.79	4.04	7.68e-06	0.0003	T12G3.6	hypothetical protein
	18492200	7.29	6.14	2.21	7.82e-06	0.0003	cyp-44A1	Probable cytochrome P450 CYP44
	18484745	6.9	9.02	-4.34	7.83e-06	0.0003	efl-3	E2F-like (mammalian transcription factor)
	18610435	8.39	6.27	4.35	7.89e-06	0.0003	F46C3.7	hypothetical protein
	18582880	5.67	7.12	-2.74	7.96e-06	0.0003	fbxa-156	F-box A protein
	18507259	7.29	5.51	3.42	8.03e-06	0.0003	try-1	TRYpsin-like protease
	18478566	6.32	8.74	-5.37	8.05e-06	0.0003	C04G6.2	hypothetical protein
	18510826	7.59	6.5	2.13	8.16e-06	0.0003	F10E9.5	hypothetical protein
	18568934	5.37	6.92	-2.94	8.28e-06	0.0003	F32D8.3	hypothetical protein
	18513478	10.26	8.7	2.94	8.26e-06	0.0003	K03H1.7	hypothetical protein
	18527794	7.07	5.43	3.11	8.33e-06	0.0003	best-17	Bestrophin homolog 17
	18597786	4.72	3.41	2.47	8.31e-06	0.0003	W04E12.2	hypothetical protein
	18459947	10.83	9.82	2.02	8.38e-06	0.0003	sqv-5	Chondroitin sulfate synthase sqv-5
	18565159	5.43	6.81	-2.59	8.44e-06	0.0003	C50B8.5	hypothetical protein
	18563866	9.71	10.99	-2.42	8.45e-06	0.0003	C26F1.1	hypothetical protein
	18584177	10.43	9.06	2.58	8.44e-06	0.0003	mcm-3	DNA helicase
	18567439	4.35	6.05	-3.24	8.48e-06	0.0003	F18E3.11	hypothetical protein
	18579740	7.41	5.94	2.77	8.49e-06	0.0003	hmit-1.2	H(+) MyoInositol coTransporter
	18500541	8.54	7.51	2.04	8.5e-06	0.0003	fut-3	FUcosyl Transferase
	18474445	8.65	9.77	-2.17	8.55e-06	0.0003	W10C8.5	hypothetical protein
	18455805	9.02	7.98	2.06	8.6e-06	0.0003	mrt-1	MoRTal germline
	18497150	6.81	5.77	2.07	8.69e-06	0.0003	agt-2	AlkylGuanine DNA alkylTransferase
	18528778	6.56	8.53	-3.91	8.7e-06	0.0003	cht-4	CHiTinase
	18633945	7.8	6.61	2.28	8.71e-06	0.0003	ZK154.5	hypothetical protein
	18597331	9.74	11.7	-3.89	8.74e-06	0.0003	hsp-16.1; hsp-16.11	Heat shock protein Hsp-16.1/Hsp-16.11
	18568886	11.75	10.73	2.03	8.76e-06	0.0003	mcm-7	DNA helicase
	18463671	7.14	8.83	-3.24	8.8e-06	0.0003	Y95B8A.2	hypothetical protein
	18461979	8.13	7.04	2.12	8.85e-06	0.0003	tag-63	hypothetical protein
	18505906	10.32	11.98	-3.15	8.85e-06	0.0003	Y51H7C.13	hypothetical protein
	18565012	7.47	6.36	2.16	8.85e-06	0.0003	set-5	SET (trithorax/polycomb) domain containing
	18616168	7.64	10.36	-6.58	8.87e-06	0.0003	alh-13	Glutamate 5-kinase
	18474128	7.72	6.46	2.39	8.91e-06	0.0003	W04A8.1	hypothetical protein
	18567397	8.31	9.89	-3	8.89e-06	0.0003	F17C11.6	hypothetical protein
	18530635	6.92	8.82	-3.72	9.11e-06	0.0003	pho-9	intestinal acid PHOsphatase
	18520530	6.59	8.81	-4.66	8.98e-06	0.0003	agmo-1	Alkylglycerol monooxygenase homolog
	18475212	8.22	7.16	2.08	9.09e-06	0.0003	Y18H1A.7	hypothetical protein
	18482964	3.25	4.45	-2.3	8.99e-06	0.0003	F26G1.10	hypothetical protein
	18506837	7.05	5.85	2.29	9.09e-06	0.0003	him-14	MutS protein homolog him-14
	18508355	6.92	5.69	2.33	9.1e-06	0.0003	C02F5.13	TM2 domain-containing protein C02F5.13
	18579661	6.2	7.42	-2.32	9.04e-06	0.0003	grdn-1	GiRDiN (mammalian actin-binding protein) homolog
	18601311	9.12	8.11	2.02	9.1e-06	0.0003	mre-11	Double-strand break repair protein mre-11
	18491360	10.87	12.65	-3.42	9.16e-06	0.0004	rol-1	ROLler: helically twisted, animals roll when moving
	18462659	6.31	8.79	-5.57	9.18e-06	0.0004	col-48	COLlagen
	18630455	8.35	5.82	5.78	9.18e-06	0.0004	R09F10.8	hypothetical protein
	18511545	9.48	8.44	2.05	9.22e-06	0.0004	wdr-48	WD repeat-containing protein 48 homolog
	18518533	9.47	8.43	2.05	9.25e-06	0.0004	ceh-92	C. Elegans Homeobox
	18617598	7.51	6.43	2.11	9.28e-06	0.0004	cbs-1	Cystathionine Beta-Synthase
	18572932	8.59	7.58	2.02	9.28e-06	0.0004	K08F9.4	hypothetical protein
	18505570	7.29	8.38	-2.13	9.33e-06	0.0004	Y48B6A.5	Major sperm protein
	18620038	11.26	12.51	-2.37	9.32e-06	0.0004	C15C7.5	hypothetical protein
	18550584	7.18	8.3	-2.18	9.36e-06	0.0004	ilys-4	Invertebrate LYSozyme
	18573123	7.46	8.56	-2.15	9.46e-06	0.0004	K09H11.1	hypothetical protein
	18519525	8.41	9.46	-2.07	9.54e-06	0.0004	ZK1128.7	hypothetical protein
	18619922	7.81	9.29	-2.8	9.58e-06	0.0004	C14H10.3	hypothetical protein
	18559968	9.06	7.84	2.33	9.6e-06	0.0004	mdf-2	MAD (yeast Mitosis arrest DeFicient) related
	18532482	6.96	4.83	4.38	9.7e-06	0.0004	puf-7	Pumilio domain-containing protein 7
	18533453	10.17	8.91	2.39	9.7e-06	0.0004	C08F8.3	hypothetical protein
	18601901	7.17	6.16	2.01	9.69e-06	0.0004	ztf-9	Zinc finger putative Transcription Factor family
	18471303	8.74	7.37	2.6	9.74e-06	0.0004	mut-2	MUTator
	18458112	8.66	7.39	2.41	9.8e-06	0.0004	atm-1	Serine/threonine-protein kinase ATM
	18579975	4.06	5.76	-3.27	9.79e-06	0.0004	Y60A3A.23	hypothetical protein
	18586061	10.78	9.76	2.03	9.81e-06	0.0004	zhit-1	Zinc finger, HIT-type
	18542829	4.7	5.93	-2.35	9.84e-06	0.0004	W01B6.4	hypothetical protein
	18484778	5.37	4.23	2.2	9.89e-06	0.0004	F52C6.3	hypothetical protein
	18573732	5.91	7.34	-2.68	9.86e-06	0.0004	R02D5.3	hypothetical protein
	18451963	7.04	5.29	3.35	9.96e-06	0.0004	acd-2	hypothetical protein
	18544229	7.84	9.03	-2.28	9.94e-06	0.0004	hpo-6	hypothetical protein
	18621960	5.42	3.81	3.04	9.92e-06	0.0004	C49F5.3	hypothetical protein
	18471935	6.41	5.25	2.24	1e-05	0.0004	rrf-2	RNA-dependent RNA polymerase Family
	18588649	8.77	10.66	-3.7	9.99e-06	0.0004	asp-13	ASpartyl Protease
	18550294	7.21	8.44	-2.34	1e-05	0.0004	C49C3.10	hypothetical protein
	18590015	9.79	8.75	2.07	1e-05	0.0004	gon-14	hypothetical protein
	18461467	8.29	7.22	2.09	1.01e-05	0.0004	Y23H5A.2	hypothetical protein
	18518935	6.38	7.76	-2.6	1.01e-05	0.0004	Y75B8A.4	Lon protease homolog 2, peroxisomal
	18634189	8.76	11.48	-6.58	1.02e-05	0.0004	wrt-4	Warthog protein 4 N-product
	18500026	9.96	12.29	-5.03	1.02e-05	0.0004	col-38	COLlagen
	18506385	7.7	6.02	3.21	1.02e-05	0.0004	tag-276	hypothetical protein
	18458907	7.02	5.63	2.62	1.03e-05	0.0004	T04D3.8	hypothetical protein
	18635621	10.15	8.69	2.76	1.03e-05	0.0004
	18527310	7.95	6.25	3.26	1.03e-05	0.0004	tbx-9	T-box transcription factor tbx-9
	18575917	5.85	3.95	3.73	1.04e-05	0.0004	col-142	COLlagen
	18611594	6.52	8.3	-3.44	1.04e-05	0.0004	F54B11.11	hypothetical protein
	18534119	9.03	7.91	2.17	1.05e-05	0.0004	vha-7	V-type proton ATPase subunit a
	18543694	7.44	6.2	2.36	1.05e-05	0.0004	set-21	SET (trithorax/polycomb) domain containing
	18549681	8.77	10.17	-2.64	1.05e-05	0.0004	col-113	COLlagen
	18472323	6.97	9.4	-5.4	1.05e-05	0.0004	suro-1	SUPpressor of ROller
	18569819	11.02	12.19	-2.25	1.05e-05	0.0004	grd-5	GRounDhog (hedgehog-like family)
	18537444	9.13	10.99	-3.65	1.06e-05	0.0004	dpy-13	Cuticle collagen dpy-13
	18503866	6.1	4.55	2.92	1.06e-05	0.0004	T24E12.11	hypothetical protein
	18462207	8.13	6.94	2.29	1.07e-05	0.0004	atm-1	Serine/threonine-protein kinase ATM
	18452187	6.04	8.34	-4.92	1.08e-05	0.0004	C30F8.3	hypothetical protein
	18511149	4.97	6.11	-2.2	1.08e-05	0.0004	F23F12.13	hypothetical protein
	18516786	8.42	7.26	2.24	1.08e-05	0.0004	orc-1	ORC (Origin Recognition Complex) subunit
	18523147	9.46	8.36	2.15	1.08e-05	0.0004	sas-4	Spindle assembly abnormal protein 4
	18532838	9.4	8.35	2.08	1.08e-05	0.0004	cpna-3	CoPiNe domain protein, Atypical
	18546479	7.4	8.89	-2.8	1.08e-05	0.0004	pqn-89	Prion-like-(Q/N-rich)-domain-bearing protein
	18571464	5.81	7.05	-2.37	1.07e-05	0.0004	F57G8.5	hypothetical protein
	18577743	8.35	9.8	-2.74	1.08e-05	0.0004	W07G4.5	hypothetical protein
	18560357	9.08	7.87	2.31	1.09e-05	0.0004	tag-349	hypothetical protein
	18632123	5.41	6.5	-2.13	1.09e-05	0.0004	T22B2.6	hypothetical protein
	18505204	7.84	8.92	-2.12	1.1e-05	0.0004	Y39G8B.1	hypothetical protein
	18587225	9.77	7.57	4.61	1.1e-05	0.0004	F14H3.6	hypothetical protein
	18551197	6.71	8.14	-2.68	1.1e-05	0.0004	F13B6.2	hypothetical protein
	18492671	7.78	6.45	2.52	1.1e-05	0.0004	ZK970.7	hypothetical protein
	18467284	10.86	9.14	3.3	1.11e-05	0.0004	DY3.8	hypothetical protein
	18465129	8.16	6.92	2.36	1.12e-05	0.0004	C06A5.8	hypothetical protein
	18547290	7.93	9.09	-2.24	1.12e-05	0.0004	ZK593.3	hypothetical protein
	18509325	8.58	7.39	2.29	1.13e-05	0.0004	bcl-7	BCL7-like protein C28H8.1
	18454899	9.54	8.45	2.13	1.14e-05	0.0004	prom-1	PRogression Of Meiosis
	18484287	7.61	9.59	-3.93	1.14e-05	0.0004
	18539486	7.03	8.09	-2.08	1.14e-05	0.0004	F58G6.7	hypothetical protein
	18484266	6.6	5.26	2.52	1.14e-05	0.0004	F43G6.7	hypothetical protein
	18489421	8.78	7.46	2.5	1.15e-05	0.0004	osta-3	Organic Solute Transporter Alpha-like protein
	18518881	7.44	6.12	2.49	1.15e-05	0.0004	pqn-92	Prion-like-(Q/N-rich)-domain-bearing protein
	18626291	9.4	10.48	-2.12	1.16e-05	0.0004	mxl-3	MaX-Like
	18633648	5.43	7.06	-3.09	1.16e-05	0.0004	ZC374.2	hypothetical protein
	18593566	4.93	7.13	-4.59	1.17e-05	0.0004	M03E7.4	hypothetical protein
	18552573	8.09	6.78	2.48	1.17e-05	0.0004	F42A9.8	hypothetical protein
	18610335	6.75	4.69	4.16	1.17e-05	0.0004	rgs-11	Regulator of G-protein signaling rgs-11
	18455243	11.81	10.74	2.1	1.18e-05	0.0004	gras-1	GRASP (General Receptor for phosphoinositides 1-Associated Scaffold Protein) homolog
	18491017	6.56	7.6	-2.05	1.18e-05	0.0004	Y53F4B.11	hypothetical protein
	18511239	8.74	7.55	2.28	1.18e-05	0.0004	nop-1	Pseudocleavage protein nop-1
	18597632	6.31	7.62	-2.49	1.18e-05	0.0004	W02F12.2	Alkaline ceramidase
	18476356	9.64	8.52	2.17	1.19e-05	0.0004	cdt-1	CDT (S. pombe CDC10 Dependent Transcript) homolog
	18585310	11.26	12.3	-2.05	1.19e-05	0.0004	col-161	COLlagen
	18552754	9.13	10.47	-2.53	1.21e-05	0.0004	nlp-20	Neuropeptide-Like Protein
	18614327	5.11	7.05	-3.85	1.21e-05	0.0004	R07B1.9	hypothetical protein
	18577245	9.99	11.24	-2.38	1.22e-05	0.0004	npa-1	Nematode Polyprotein Allergen related
	18535969	6.97	9.07	-4.28	1.22e-05	0.0004	atic-1	5-Aminoimidazole-4-carboxamide ribonucleotide formylTransferase/IMP Cyclohydrolase homolog
	18609707	7.5	9.55	-4.16	1.22e-05	0.0004	F38B6.4	hypothetical protein
	18489186	7.86	9.02	-2.23	1.23e-05	0.0004	gst-13	Glutathione S-Transferase
	18552470	7.79	6.51	2.43	1.23e-05	0.0004	F40F11.3	hypothetical protein
	18621105	7.5	8.62	-2.17	1.24e-05	0.0004	C34F6.5	hypothetical protein
	18467117	9.15	8.07	2.12	1.26e-05	0.0004	D1081.9	hypothetical protein
	18565902	6.56	7.62	-2.08	1.25e-05	0.0004	D1054.8	hypothetical protein
	18598838	7.5	9.22	-3.29	1.25e-05	0.0004	Y32F6B.1	Solute carrier organic anion transporter family member
	18504874	10.63	9.44	2.29	1.28e-05	0.0004	mcm-2	DNA helicase
	18613516	4.4	5.6	-2.3	1.28e-05	0.0004	K11E4.2	hypothetical protein
	18571734	6.1	7.94	-3.59	1.28e-05	0.0004	dgat-2	acyl-CoA:DiacylGlycerol AcylTransferase
	18606022	4.44	3.37	2.1	1.29e-05	0.0004	C44C10.5	hypothetical protein
	18493473	7.03	5.62	2.65	1.3e-05	0.0004	clec-147	C-type LECtin
	18595959	8.91	7.59	2.49	1.3e-05	0.0004
	18459023	6.38	8.1	-3.31	1.3e-05	0.0004	T06A4.3	hypothetical protein
	18496869	10.94	9.78	2.23	1.3e-05	0.0004	gfat-1	Glutamine-Fructose 6-phosphate AminoTransferase homolog
	18631523	4.67	5.91	-2.36	1.32e-05	0.0004	T10E10.4	hypothetical protein
	18462670	6.86	5.79	2.1	1.32e-05	0.0004	dnj-28	DNaJ domain (prokaryotic heat shock protein)
	18510107	8.64	7.61	2.05	1.34e-05	0.0004	com-1	Completion Of Meiotic recombination (budding yeast Com) related
	18615544	8.56	9.93	-2.58	1.34e-05	0.0004	col-167	COLlagen
	18633603	5.66	8.61	-7.75	1.34e-05	0.0004	mab-7	Protein male abnormal 7
	18529851	9.91	8.75	2.24	1.35e-05	0.0004	pph-4.2	Serine/threonine-protein phosphatase
	18577369	9.44	7.63	3.51	1.34e-05	0.0004	era-1	Embryonic mRna (mRNA) Anterior
	18611705	5.23	4.01	2.33	1.36e-05	0.0004	F54F7.2	hypothetical protein
	18458967	9.51	7.96	2.93	1.36e-05	0.0004	T05F1.2	hypothetical protein
	18584753	6.59	7.61	-2.03	1.37e-05	0.0004	C35A5.3	hypothetical protein
	18614926	9.44	10.8	-2.58	1.37e-05	0.0004	T02C5.1	hypothetical protein
	18593089	6.59	5.22	2.59	1.39e-05	0.0004	K09D9.12	pseudo
	18457149	8	6.92	2.11	1.39e-05	0.0004	F57B10.4	hypothetical protein
	18614567	5.52	7.24	-3.29	1.39e-05	0.0004	R09F10.18	ncRNA
	18502108	3.87	6.28	-5.33	1.39e-05	0.0004	nas-23	Zinc metalloproteinase nas-23
	18461117	6.65	5.62	2.04	1.4e-05	0.0004	Y106G6H.16	hypothetical protein
	18520651	11.1	9.95	2.21	1.4e-05	0.0004	rnr-2	Ribonucleoside-diphosphate reductase small chain
	18604780	6.67	8.92	-4.74	1.42e-05	0.0004	C26B9.3	hypothetical protein
	18465747	9.78	8.58	2.29	1.42e-05	0.0004	C30F12.4	hypothetical protein
	18505735	9.69	11.74	-4.14	1.43e-05	0.0004	col-71	COLlagen
	18482137	8.42	6.85	2.98	1.43e-05	0.0004	F12E12.1	hypothetical protein
	18519964	6.05	4.94	2.15	1.43e-05	0.0004	ZK643.2	Probable deoxycytidylate deaminase
	18615258	8.12	9.53	-2.67	1.43e-05	0.0004	ugt-50	Putative UDP-glucuronosyltransferase ugt-50
	18621219	5.35	7.14	-3.46	1.42e-05	0.0004	C36B7.5	hypothetical protein
	18520278	8.97	7.86	2.17	1.44e-05	0.0004	abi-1	ABl Interactor homolog
	18538887	7.79	9.24	-2.73	1.45e-05	0.0004	F54D1.6	hypothetical protein
	18584409	8.58	7.49	2.14	1.45e-05	0.0004	C29A12.1	hypothetical protein
	18588842	5.65	4.59	2.09	1.45e-05	0.0004	dhs-17	DeHydrogenases, Short chain
	18499581	5.32	6.47	-2.21	1.46e-05	0.0004	drr-1	Dietary Restriction Response (WT but not eat-2 lifespan increased)
	18493719	7.46	6.42	2.06	1.47e-05	0.0004	ceh-58	C. Elegans Homeobox
	18572509	6.06	8.2	-4.41	1.47e-05	0.0004	swt-5	SWEET sugar transporter family
	18514094	6.36	5.07	2.44	1.47e-05	0.0004	ins-23	Probable insulin-like peptide alpha-type 3
	18557527	9.98	8.65	2.51	1.48e-05	0.0004	flh-1	FLYWCH zinc finger transcription factor homolog
	18488150	10.49	9.36	2.19	1.5e-05	0.0004	gld-3	Defective in germ line development protein 3
	18587525	5.17	3.67	2.82	1.5e-05	0.0004	ceh-49	One cut domain family member
	18517141	10.65	9.11	2.9	1.51e-05	0.0004	Y39E4B.5	hypothetical protein
	18574614	5.15	3.46	3.24	1.52e-05	0.0004	T01G5.7	hypothetical protein
	18622000	8.94	10.96	-4.03	1.52e-05	0.0004	C49F8.3	hypothetical protein
	18458235	9	7.99	2.02	1.53e-05	0.0004	M01A10.1	hypothetical protein
	18495548	6.5	4.79	3.27	1.53e-05	0.0004	C34F11.8	hypothetical protein
	18486907	6.21	8.39	-4.54	1.53e-05	0.0004	M195.2	hypothetical protein
	18489570	11.73	10.34	2.62	1.54e-05	0.0004	mex-1	Muscle EXcess
	18490265	7.67	6.36	2.49	1.54e-05	0.0004	cyd-1	G1/S-specific cyclin-D
	18478448	8.76	10.15	-2.63	1.55e-05	0.0004	mtrr-1	Putative methionine synthase reductase
	18604729	6.25	8.7	-5.48	1.56e-05	0.0004	C25F6.7	hypothetical protein
	18531250	7.62	6.28	2.54	1.56e-05	0.0004	ZC155.4	hypothetical protein
	18485759	4.59	5.83	-2.37	1.56e-05	0.0004	H17B01.2	hypothetical protein
	18500024	7.64	8.87	-2.34	1.56e-05	0.0004	F54C9.3	hypothetical protein
	18532111	7.62	8.99	-2.58	1.61e-05	0.0005	cuc-1	CU (copper) Chaperonin
	18572914	10.4	9.15	2.38	1.61e-05	0.0005	apx-1	Anterior pharynx in excess protein 1
	18494351	6.41	5.25	2.24	1.61e-05	0.0005	C16C8.5	hypothetical protein
	18494950	8.35	7.3	2.08	1.61e-05	0.0005	dsh-2	DiSHevelled related
	18520388	10.88	9.7	2.27	1.61e-05	0.0005	B0393.6	hypothetical protein
	18542880	12.94	11.88	2.08	1.63e-05	0.0005	mex-5	Zinc finger protein mex-5
	18497648	6.48	5.33	2.22	1.64e-05	0.0005	F15A4.10	hypothetical protein
	18607926	5.53	4.39	2.21	1.64e-05	0.0005	F13C5.1	hypothetical protein
	18580166	11.74	9.94	3.47	1.65e-05	0.0005	col-42	COLlagen
	18475078	7.3	8.71	-2.66	1.65e-05	0.0005	zig-9	2 (Zwei) IG domain protein
	18579561	6.18	5.12	2.09	1.65e-05	0.0005	Y50D4C.2	pseudo
	18626025	5.23	7.21	-3.94	1.66e-05	0.0005	F44A6.5	hypothetical protein
	18480101	9.68	8.07	3.05	1.66e-05	0.0005	szy-4	Suppressor of ZYg-1
	18466319	8.84	7.78	2.09	1.67e-05	0.0005	cmt-1	p31CoMeT related
	18483228	5.19	6.42	-2.33	1.68e-05	0.0005	F31D5.1	hypothetical protein
	18489645	10.17	8.82	2.55	1.68e-05	0.0005	W06B4.1	hypothetical protein
	18587689	8.72	7.69	2.05	1.68e-05	0.0005	ets-6	ETS class transcription factor
	18521112	8.79	7.67	2.18	1.69e-05	0.0005	clk-2	Telomere length regulation protein clk-2
	18463813	8.5	6.41	4.25	1.7e-05	0.0005	ZC308.4	hypothetical protein
	18549389	10.58	9.12	2.74	1.69e-05	0.0005	C31H1.8	hypothetical protein
	18618956	4.55	6.73	-4.52	1.7e-05	0.0005	C03F11.2	hypothetical protein
	18625274	7.68	8.91	-2.34	1.7e-05	0.0005	F36G3.2	hypothetical protein
	18540695	9.57	10.7	-2.2	1.7e-05	0.0005	LLC1.2	hypothetical protein
	18478064	6.11	8.84	-6.61	1.71e-05	0.0005	B0334.13	hypothetical protein
	18524372	7.56	8.69	-2.19	1.71e-05	0.0005	prk-2	Serine/threonine-protein kinase prk-2
	18486646	4.54	5.89	-2.54	1.72e-05	0.0005	M02G9.3	hypothetical protein
	18566952	8.25	6.9	2.54	1.73e-05	0.0005	F13A7.14	hypothetical protein
	18576585	8.44	7.4	2.04	1.73e-05	0.0005	phf-30	PHd Finger family
	18490903	9.34	10.81	-2.78	1.74e-05	0.0005	Y51H7C.1	hypothetical protein
	18524318	8.05	6.99	2.08	1.74e-05	0.0005	F44E2.7	Putative zinc finger protein F44E2.7
	18628019	6.98	8.56	-2.99	1.74e-05	0.0005	F59F4.1	Acyl-coenzyme A oxidase
	18587533	10.07	9.03	2.05	1.76e-05	0.0005	F17C11.10	hypothetical protein
	18634523	6.44	5	2.72	1.76e-05	0.0005
	18634531	6.44	5	2.72	1.76e-05	0.0005
	18547112	5.95	4.35	3.03	1.77e-05	0.0005	sdz-36	SKN-1 Dependent Zygotic transcript
	18486555	8.42	7.01	2.66	1.79e-05	0.0005	K12D12.5	hypothetical protein
	18610258	6.68	8.13	-2.74	1.81e-05	0.0005	nspc-12; nspc-15	Nematode Specific Peptide family, group C
	18501732	10.03	8.84	2.29	1.82e-05	0.0005	nos-1	NanOS related
	18524166	7.81	6.77	2.05	1.82e-05	0.0005	nhr-20	Nuclear hormone receptor family member nhr-20
	18536266	6.72	5.37	2.56	1.82e-05	0.0005	F02H6.2	hypothetical protein
	18553369	8.08	9.38	-2.47	1.82e-05	0.0005	mec-17	Alpha-tubulin N-acetyltransferase 1
	18557028	6.83	8.21	-2.6	1.82e-05	0.0005	egl-20	hypothetical protein
	18576416	9.31	7.36	3.86	1.83e-05	0.0005	T21C9.13	hypothetical protein
	18495360	7.97	9.03	-2.08	1.83e-05	0.0005	shn-1	SHaNk (SH3/ankyrin domain scaffold protein) related
	18475491	12.07	11.06	2.01	1.84e-05	0.0005	tpxl-1	TPX2 (Targeting Protein for Xenopus Klp2)-Like
	18534884	9.78	8.59	2.27	1.85e-05	0.0005	C39E9.12	hypothetical protein
	18595575	4.18	5.66	-2.8	1.85e-05	0.0005	T06E4.10	hypothetical protein
	18635339	7.75	6.48	2.4	1.85e-05	0.0005
	18551136	8.47	7.3	2.25	1.86e-05	0.0005	F12F6.7	Probable DNA polymerase delta small subunit
	18633798	9.89	11.04	-2.23	1.88e-05	0.0005	ttr-48	TransThyretin-Related family domain
	18608737	8.1	6.09	4.03	1.89e-05	0.0005	F19H6.4	hypothetical protein
	18632928	8.55	10.07	-2.87	1.89e-05	0.0005	sma-5	Mitogen-activated protein kinase sma-5
	18463539	8.11	7.04	2.1	1.9e-05	0.0005	nyn-2	NYN domain ribonuclease homolog
	18627323	6.43	8.09	-3.17	1.95e-05	0.0005	F53H4.3	hypothetical protein
	18616284	5.08	7.24	-4.48	1.95e-05	0.0005	ram-5	hypothetical protein
	18473595	7.1	6.07	2.04	1.97e-05	0.0005	har-2	hypothetical protein
	18459967	10.53	9.16	2.58	1.97e-05	0.0005	chs-1	CHitin Synthase
	18621038	10.49	11.53	-2.05	1.99e-05	0.0005	C34E7.4	hypothetical protein
	18537845	9.39	8.35	2.06	2.01e-05	0.0005	lin-3	Protein lin-3
	18556570	6.97	8.15	-2.28	2.02e-05	0.0005	T23F6.3	hypothetical protein
	18478443	9.3	6.77	5.75	2.03e-05	0.0005	C01G6.3	hypothetical protein
	18543375	6.93	8.79	-3.64	2.05e-05	0.0005	Y105C5B.9	Phytanoyl-CoA dioxygenase domain-containing protein 1 homolog
	18635099	3.84	6.87	-8.13	2.04e-05	0.0005
	18622959	4.13	3.08	2.07	2.06e-05	0.0005	ced-8	Cell death abnormality protein 8
	18503800	6.86	5.59	2.41	2.07e-05	0.0005	T24B8.5	hypothetical protein
	18521314	8.7	7.56	2.2	2.07e-05	0.0005	C13G5.2	hypothetical protein
	18586029	9.71	8.68	2.04	2.08e-05	0.0005	C56A3.4	hypothetical protein
	18498551	7.78	6.69	2.13	2.09e-05	0.0005	F33G12.3	hypothetical protein
	18553006	6.46	7.82	-2.55	2.09e-05	0.0005	F52G2.3	hypothetical protein
	18535158	6.27	7.4	-2.19	2.14e-05	0.0005	fbxc-1; fbxc-5	F-box C protein
	18535167	6.27	7.4	-2.19	2.14e-05	0.0005	fbxc-2; fbxc-4; fbxc-3	F-box C protein
	18535171	6.27	7.4	-2.19	2.14e-05	0.0005	fbxc-2; fbxc-4; fbxc-3	F-box C protein
	18535175	6.27	7.4	-2.19	2.14e-05	0.0005	fbxc-1; fbxc-5	F-box C protein
	18555874	11	9.82	2.27	2.15e-05	0.0005	daf-18	hypothetical protein
	18451679	7.19	9.23	-4.11	2.17e-05	0.0005	C15C6.1	hypothetical protein
	18458611	7.64	6.37	2.41	2.18e-05	0.0005	ztf-15	Zinc finger putative Transcription Factor family
	18466311	8.54	7.52	2.03	2.18e-05	0.0005	C41D11.3	hypothetical protein
	18483036	9.06	7.98	2.11	2.17e-05	0.0005	dsb-2	Double-Strand Break factor
	18606824	6.02	4.94	2.12	2.18e-05	0.0005	D1005.2	hypothetical protein
	18455031	7.46	5.88	2.99	2.21e-05	0.0005	F27D4.8	hypothetical protein
	18536490	7.8	6.7	2.14	2.21e-05	0.0005	msh-5	MSH (MutS Homolog) family
	18483480	11.78	10.6	2.26	2.23e-05	0.0005	F35C11.5	hypothetical protein
	18536274	6.51	4.3	4.61	2.23e-05	0.0005	F02H6.3	hypothetical protein
	18565963	6.65	8.87	-4.65	2.23e-05	0.0005	D1086.3	hypothetical protein
	18476550	10.91	9.73	2.25	2.24e-05	0.0005	Y65B4BL.4	hypothetical protein
	18598319	7.15	5.46	3.23	2.24e-05	0.0005	Y102A5C.36	hypothetical protein
	18491340	7.1	5.84	2.39	2.26e-05	0.0006	Y57A10A.1	hypothetical protein
	18601483	12.35	11.29	2.08	2.27e-05	0.0006	spn-4	hypothetical protein
	18620082	6.95	8.1	-2.23	2.29e-05	0.0006	prx-3	PeRoXisome assembly factor
	18480833	4.82	6.4	-2.99	2.29e-05	0.0006	col-68	COLlagen
	18551901	3.83	4.84	-2.02	2.3e-05	0.0006	aat-8	Amino Acid Transporter
	18477880	12.03	10.55	2.79	2.3e-05	0.0006	mex-6	Zinc finger protein mex-6
	18508907	10.48	9.46	2.03	2.3e-05	0.0006	plk-1	Serine/threonine-protein kinase plk-1
	18599266	5.25	4.23	2.02	2.31e-05	0.0006	ztf-20	Zinc finger putative Transcription Factor family
	18603118	7.02	8.04	-2.04	2.31e-05	0.0006	amt-4	Ammonium transporter
	18494931	10.98	9.95	2.05	2.32e-05	0.0006	ify-1	Interactor of FizzY protein
	18508703	12.98	11.72	2.41	2.32e-05	0.0006	cpg-1	Chondroitin proteoglycan 1
	18618683	8.4	9.61	-2.31	2.33e-05	0.0006	acl-12	Putative 1-acyl-sn-glycerol-3-phosphate acyltransferase acl-12
	18482914	4.54	5.59	-2.07	2.33e-05	0.0006	F23F1.2	hypothetical protein
	18536086	8.59	7.56	2.04	2.34e-05	0.0006	D2096.12	hypothetical protein
	18549584	9.81	8.65	2.24	2.38e-05	0.0006	sgo-1	ShuGOshin (yeast chromosome segregation protein) homolog
	18588709	7.56	6.55	2	2.38e-05	0.0006	F28F8.9	hypothetical protein
	18478622	11.93	10.76	2.24	2.39e-05	0.0006	C05C10.5	hypothetical protein
	18497443	8.77	9.95	-2.26	2.42e-05	0.0006	F13D12.9	hypothetical protein
	18477545	8.38	10.73	-5.08	2.43e-05	0.0006	col-63	COLlagen
	18536483	8.7	7.27	2.71	2.47e-05	0.0006	grd-10	GRounDhog (hedgehog-like family)
	18576165	8.62	10.25	-3.08	2.48e-05	0.0006	nlp-33	Neuropeptide-like protein 33
	18544747	5.23	6.38	-2.22	2.49e-05	0.0006	clec-72	C-type LECtin
	18578408	8.48	7.34	2.2	2.5e-05	0.0006	set-22	SET (trithorax/polycomb) domain containing
	18508842	9.04	7.98	2.09	2.5e-05	0.0006	C14B1.2	hypothetical protein
	18548419	6.85	8.69	-3.6	2.51e-05	0.0006	C06E7.4	hypothetical protein
	18614569	8.21	10.11	-3.72	2.51e-05	0.0006	pqn-57; abu-9	Prion-like-(Q/N-rich)-domain-bearing protein; Activated in Blocked Unfolded protein response
	18570681	7.56	8.6	-2.05	2.53e-05	0.0006	F53C11.3	Uncharacterized oxidoreductase F53C11.3
	18552204	6.49	7.62	-2.2	2.54e-05	0.0006
	18558393	11.2	12.81	-3.06	2.55e-05	0.0006	dpy-4	DumPY: shorter than wild-type
	18509896	9.35	8.17	2.26	2.57e-05	0.0006	C38D4.4	hypothetical protein
	18553914	7.59	6.58	2.02	2.58e-05	0.0006	inx-7	Innexin
	18573309	7.13	5.58	2.93	2.57e-05	0.0006	K11D12.13	hypothetical protein
	18548305	7.43	8.93	-2.82	2.6e-05	0.0006	C05C12.4	hypothetical protein
	18499489	5.47	7.78	-4.95	2.6e-05	0.0006	F45D11.14; F45D11.15; F45D11.16	hypothetical protein
	18499498	5.47	7.78	-4.95	2.6e-05	0.0006	F45D11.14; F45D11.15; F45D11.16	hypothetical protein
	18499507	5.47	7.78	-4.95	2.6e-05	0.0006	F45D11.14; F45D11.15; F45D11.16	hypothetical protein
	18522323	10.86	9.74	2.17	2.62e-05	0.0006	pal-1	Homeobox protein pal-1
	18489549	9.48	8.28	2.29	2.63e-05	0.0006	W03C9.2	hypothetical protein
	18487680	10.8	9.48	2.5	2.64e-05	0.0006	perm-1	PERMeable eggshell
	18518591	7.35	6.34	2.02	2.64e-05	0.0006	Y67D2.4	hypothetical protein
	18586524	6.4	7.96	-2.94	2.65e-05	0.0006	F07C3.9	hypothetical protein
	18507773	10.98	9.56	2.68	2.66e-05	0.0006	egg-1	EGG sterile (unfertilizable)
	18623969	8.62	6.06	5.89	2.67e-05	0.0006	ent-5	Equilibrative Nucleoside Transporter
	18494406	4.44	8.14	-12.95	2.71e-05	0.0006	acdh-2	Acyl CoA DeHydrogenase
	18623927	7.2	6	2.29	2.7e-05	0.0006	dpy-6	DumPY: shorter than wild-type
	18565224	9.6	8.6	2.01	2.72e-05	0.0006	C50E3.5	hypothetical protein
	18584435	4.97	7.44	-5.54	2.73e-05	0.0006	wrt-8	Warthog protein 8 N-product
	18509362	6.63	8.03	-2.64	2.73e-05	0.0006	col-90	Putative cuticle collagen 90
	18542887	6.19	7.48	-2.44	2.74e-05	0.0006	W02A2.9	hypothetical protein
	18517568	5.27	3.78	2.81	2.74e-05	0.0006	Y47D3B.12	hypothetical protein
	18464393	8.95	7.85	2.15	2.76e-05	0.0006	ZK973.1	hypothetical protein
	18572147	5.45	6.56	-2.15	2.76e-05	0.0006	K01D12.5	hypothetical protein
	18603967	7.03	8.35	-2.5	2.8e-05	0.0006	C15C7.7	GDP-fucose protein O-fucosyltransferase 1
	18595703	8.59	7.58	2.02	2.82e-05	0.0006	T07F10.3	hypothetical protein
	18630092	5.96	4.64	2.49	2.8e-05	0.0006	R04D3.4	hypothetical protein
	18568988	8.61	7.33	2.42	2.84e-05	0.0006	cat-4	GTP cyclohydrolase 1
	18474726	7.33	6.19	2.21	2.86e-05	0.0006	Y105E8B.9	hypothetical protein
	18461367	7.93	8.95	-2.03	2.87e-05	0.0006	nhx-8	Sodium/hydrogen exchanger
	18476956	9.07	11.19	-4.36	2.87e-05	0.0006	Y71G12B.25	hypothetical protein
	18489778	8.42	7.25	2.24	2.91e-05	0.0006	taf-6.1	TAF (TBP-associated transcription factor) family
	18458205	8.7	9.73	-2.05	2.93e-05	0.0006	dapk-1	DAP (Death-Associated Protein) Kinase homolog
	18516053	8.05	6.95	2.14	2.93e-05	0.0006	T28A8.6	hypothetical protein
	18607944	6.74	7.81	-2.1	2.94e-05	0.0006	acp-5	ACid Phosphatase family
	18495707	5.37	7	-3.09	2.95e-05	0.0006	ptr-3	PaTched Related family
	18498196	8.2	9.92	-3.3	2.99e-05	0.0006	F26G1.5	hypothetical protein
	18454779	7.58	8.59	-2.02	2.99e-05	0.0006	F26A3.5	hypothetical protein
	18480329	7.41	6.37	2.06	2.98e-05	0.0006	C33F10.4	hypothetical protein
	18517840	10.41	8.85	2.95	3e-05	0.0006	pie-1	Pharynx and intestine in excess protein 1
	18605145	5.56	3.84	3.3	3.03e-05	0.0006	C33D3.3	hypothetical protein
	18460128	9.22	8.12	2.15	3.05e-05	0.0006	sygl-1	hypothetical protein
	18524196	12.29	11.01	2.42	3.04e-05	0.0006	sip-1	Stress-induced protein 1
	18534330	7.3	5.85	2.72	3.05e-05	0.0006	mesp-1	MEiotic SPindle
	18579173	5.83	7.06	-2.34	3.04e-05	0.0006	Y45G12C.1	hypothetical protein
	18568946	7.79	9.01	-2.34	3.06e-05	0.0006	F32D8.7	hypothetical protein
	18472432	10.44	9.24	2.3	3.08e-05	0.0007	rskn-1	Putative ribosomal protein S6 kinase alpha-1
	18583804	3.96	5.28	-2.51	3.08e-05	0.0007	C17E7.13	hypothetical protein
	18493140	8.06	10.54	-5.55	3.12e-05	0.0007	sqt-1	Cuticle collagen sqt-1
	18527898	4.82	6.41	-3	3.14e-05	0.0007	T20B6.3	hypothetical protein
	18630086	9.96	7.07	7.42	3.19e-05	0.0007	R04D3.3	hypothetical protein
	18455376	8.44	9.45	-2.01	3.2e-05	0.0007	F32B5.1	hypothetical protein
	18552583	8.94	10.12	-2.26	3.2e-05	0.0007	ifo-1	Intermediate Filament Organize
	18530423	5.96	7.44	-2.79	3.22e-05	0.0007	Y66A7A.7	hypothetical protein
	18606138	9.86	8.25	3.05	3.24e-05	0.0007	C45B2.2	hypothetical protein
	18483123	9.46	8.33	2.18	3.25e-05	0.0007	vrk-1	Serine/threonine-protein kinase VRK1
	18560626	10.01	9.01	2	3.25e-05	0.0007	orc-5	ORC (Origin Recognition Complex) subunit
	18599898	7.68	8.9	-2.33	3.27e-05	0.0007	Y47D7A.13	hypothetical protein
	18611062	7.44	8.54	-2.13	3.28e-05	0.0007	flp-7	FMRF-Like Peptide
	18498949	11.06	12.33	-2.4	3.29e-05	0.0007	ram-2	hypothetical protein
	18455438	8.08	7.07	2.02	3.32e-05	0.0007	F32H2.10	hypothetical protein
	18573797	7.54	6.54	2	3.31e-05	0.0007	R04B5.5	hypothetical protein
	18585314	6.91	8.5	-3.01	3.31e-05	0.0007	C50B6.7	Alpha-amylase
	18608994	9.16	6.47	6.47	3.32e-05	0.0007	inx-3	Innexin-3
	18602897	9.76	7.43	5.01	3.34e-05	0.0007	C04B4.2	hypothetical protein
	18551829	9	7.24	3.38	3.35e-05	0.0007	trcs-1	TRansport of membrane to Cell Surface
	18473498	8.33	7.05	2.43	3.36e-05	0.0007	sys-1	SYmmetrical Sister cell hermaphrodite gonad defect
	18635373	7.26	8.7	-2.71	3.35e-05	0.0007
	18575914	10.49	7.35	8.8	3.37e-05	0.0007	col-143	COLlagen
	18462926	8.53	7.47	2.08	3.39e-05	0.0007	psf-3	PSF (yeast Partner of Sld Five) conserved replication factor, GINS complex
	18485817	6.13	5.02	2.16	3.4e-05	0.0007	H41C03.1	hypothetical protein
	18496681	6.8	5.58	2.34	3.4e-05	0.0007	E04F6.6	hypothetical protein
	18559494	6.4	8.26	-3.64	3.4e-05	0.0007	Y59H11AR.4	hypothetical protein
	18456630	6.58	7.86	-2.44	3.4e-05	0.0007	dhs-2	DeHydrogenases, Short chain
	18507766	5.15	3.67	2.8	3.42e-05	0.0007	B0244.7	Putative G-protein coupled receptor B0244.7
	18460384	9.31	8.18	2.19	3.45e-05	0.0007	hmg-20	HMG
	18610682	8.08	9.37	-2.45	3.45e-05	0.0007	acbp-3	Acyl-CoA-binding protein homolog 3
	18580737	8.78	7.59	2.29	3.46e-05	0.0007	wdr-5.3	WD repeat-containing protein wdr-5.3
	18625642	7.16	5.96	2.29	3.47e-05	0.0007	F41B4.3	hypothetical protein
	18618424	6.84	5.4	2.73	3.48e-05	0.0007	crn-4	Cell death-related nuclease 4
	18491567	5.4	7.19	-3.46	3.51e-05	0.0007	lgc-27	Ligand-Gated ion Channel
	18507003	6.17	7.9	-3.32	3.54e-05	0.0007	wrt-10	WaRThog (hedgehog-like family)
	18560844	9.46	11.75	-4.89	3.56e-05	0.0007	ZK180.6	hypothetical protein
	18626210	8.17	10.49	-4.99	3.55e-05	0.0007	F46C8.8	hypothetical protein
	18452477	5.37	4.21	2.24	3.55e-05	0.0007	C35E7.5	hypothetical protein
	18602245	6.15	7.16	-2.02	3.56e-05	0.0007	B0272.4	hypothetical protein
	18453646	9	7.98	2.04	3.58e-05	0.0007	D2030.8	hypothetical protein
	18572216	6.07	7.15	-2.11	3.58e-05	0.0007	K02E2.6	hypothetical protein
	18561523	7.5	5.07	5.4	3.59e-05	0.0007	nlp-29	Neuropeptide-like protein 29
	18527284	10.36	11.42	-2.09	3.61e-05	0.0007	umps-1	Uridine MonoPhosphate Synthetase
	18539937	9.89	8.78	2.15	3.61e-05	0.0007	lin-54	Protein lin-54
	18476143	7.69	6.52	2.25	3.62e-05	0.0007	impt-1	Protein IMPACT homolog
	18612616	8.59	7.57	2.03	3.65e-05	0.0007	pdk-1	3-phosphoinositide-dependent protein kinase 1
	18461938	8.13	7.11	2.03	3.7e-05	0.0007	inx-21	Innexin
	18493753	7.12	6.04	2.11	3.71e-05	0.0007	hda-2	Putative histone deacetylase 2
	18569962	8.31	7.25	2.08	3.72e-05	0.0007	F43H9.4	hypothetical protein
	18460111	8.56	7.3	2.39	3.73e-05	0.0007	mop-25.3	MO25-like protein 3
	18500470	6.37	4.54	3.55	3.73e-05	0.0007	F59A6.12	hypothetical protein
	18584251	5.05	6.1	-2.07	3.73e-05	0.0007	C25F9.12	hypothetical protein
	18604228	8	9.45	-2.73	3.73e-05	0.0007	C18A11.3	hypothetical protein
	18470865	10.12	8.95	2.24	3.76e-05	0.0007	mei-2	Meiotic spindle formation protein 2
	18497540	6.41	7.55	-2.2	3.76e-05	0.0007	F14D2.19	hypothetical protein
	18586386	5.83	6.94	-2.16	3.78e-05	0.0007	cln-3.1	Battenin
	18510612	9.98	8.86	2.17	3.83e-05	0.0007	glp-1	Protein glp-1
	18599811	3.74	5.68	-3.82	3.84e-05	0.0007	hsp-16.2	Heat Shock Protein
	18483150	10	8.64	2.56	3.87e-05	0.0007	aptf-3	AP-2 Transcription Factor family
	18540302	10.63	9.56	2.09	3.89e-05	0.0007	lag-1	Lin-12 And Glp-1 phenotype
	18565487	6.18	5.16	2.04	3.93e-05	0.0007	C53A5.13	hypothetical protein
	18492132	7.13	6.13	2	3.95e-05	0.0007	ZK1320.7	G patch domain and ankyrin repeat-containing protein 1 homolog
	18513977	8.8	7.62	2.27	3.96e-05	0.0007	K11H3.8	hypothetical protein
	18573143	9.8	8.78	2.02	3.96e-05	0.0007	rga-3	Rho GTPase Activating protein
	18570638	4.14	5.86	-3.3	4e-05	0.0008	F52F10.2	hypothetical protein
	18477827	9.02	7.91	2.16	4.01e-05	0.0008	ZK973.9	hypothetical protein
	18491960	5.78	6.83	-2.07	4.02e-05	0.0008	ZK1290.13	hypothetical protein
	18575266	8.93	7.87	2.08	4.04e-05	0.0008	suds-3	hypothetical protein
	18476637	5.72	6.78	-2.09	4.05e-05	0.0008	lagr-1	Probable ceramide synthase lagr-1
	18534741	5.8	6.92	-2.17	4.05e-05	0.0008	C34D4.2	Serine/threonine-protein phosphatase
	18498462	8.14	10.25	-4.32	4.06e-05	0.0008	moe-3	see oma
	18577964	9.42	8.35	2.09	4.06e-05	0.0008	arid-1	ARID (AT-rich Interactive Domain-containing protein) homolog
	18495022	4.61	6.37	-3.37	4.11e-05	0.0008	C27D9.2	hypothetical protein
	18616126	6.84	8.96	-4.35	4.11e-05	0.0008	T22B7.3	hypothetical protein
	18612929	8.71	5.51	9.18	4.11e-05	0.0008	K04C1.5	hypothetical protein
	18611731	5.55	4.4	2.21	4.12e-05	0.0008	F54F7.6	hypothetical protein
	18590076	9	7.91	2.13	4.13e-05	0.0008	F44E7.5	hypothetical protein
	18465275	10.93	9.41	2.87	4.16e-05	0.0008	lin-41	Protein lin-41
	18563092	4.84	6.46	-3.08	4.2e-05	0.0008	srr-6	Serpentine Receptor, class R
	18576093	7.97	9.85	-3.68	4.2e-05	0.0008	T19B10.2	hypothetical protein
	18459385	8.08	6.92	2.23	4.22e-05	0.0008	sld-2	hypothetical protein
	18536663	5	7.1	-4.28	4.31e-05	0.0008	F13B6.1	hypothetical protein
	18634086	5.74	8.06	-5.01	4.31e-05	0.0008	ZK470.6	hypothetical protein
	18551083	9.81	8.6	2.32	4.31e-05	0.0008	F11E6.7	hypothetical protein
	18604156	7.34	5.79	2.92	4.34e-05	0.0008	C17G1.2	hypothetical protein
	18515284	10.37	9.34	2.04	4.37e-05	0.0008	cdk-1	Cyclin-dependent kinase 1
	18551650	9.17	10.35	-2.27	4.39e-05	0.0008	pcp-2	Prolyl Carboxy Peptidase like
	18580983	12.62	11	3.08	4.41e-05	0.0008	oma-2	hypothetical protein
	18632949	5.42	6.59	-2.25	4.42e-05	0.0008	dot-1.3	Histone-lysine N-methyltransferase, H3 lysine-79 specific
	18482900	8.9	7.68	2.32	4.47e-05	0.0008	F22E5.9	hypothetical protein
	18604673	8.36	9.64	-2.44	4.47e-05	0.0008	dlg-1	Drosophila Discs LarGe homolog
	18602363	8.81	10.05	-2.36	4.48e-05	0.0008	B0403.5	hypothetical protein
	18551788	12.03	10.54	2.8	4.5e-05	0.0008	gln-5	GLutamiNe synthetase (glutamate-ammonia ligase)
	18539068	7.47	8.53	-2.09	4.51e-05	0.0008	F55G11.8	hypothetical protein
	18472268	7.13	6.09	2.05	4.52e-05	0.0008
	18552141	8.94	9.96	-2.02	4.55e-05	0.0008	F35H10.10	hypothetical protein
	18480995	7.41	6.31	2.13	4.56e-05	0.0008	vps-33.2	related to yeast Vacuolar Protein Sorting factor
	18591845	6.32	7.39	-2.09	4.6e-05	0.0008	flr-2	hypothetical protein
	18492212	9.89	8.81	2.1	4.62e-05	0.0008	fzy-1	WD repeat-containing protein fzy-1
	18574166	7.96	6.64	2.49	4.64e-05	0.0008	R11D1.1	hypothetical protein
	18497203	9.15	8.11	2.05	4.68e-05	0.0008	F10B5.8	hypothetical protein
	18463828	9.33	8.14	2.28	4.7e-05	0.0008	san-1	hypothetical protein
	18546937	6.12	4.76	2.57	4.69e-05	0.0008	ZC168.2	hypothetical protein
	18630259	7.37	8.44	-2.09	4.7e-05	0.0008	R07E3.1	hypothetical protein
	18456764	6.7	7.98	-2.43	4.71e-05	0.0008	F55H12.3	hypothetical protein
	18602644	3.82	5.19	-2.59	4.71e-05	0.0008	jud-4	hypothetical protein
	18498560	8.41	7.25	2.23	4.73e-05	0.0008	lrr-1	Leucine-Rich Repeat protein
	18562012	5.67	6.82	-2.22	4.76e-05	0.0008	C01G10.9	Methylthioribose-1-phosphate isomerase
	18597671	3.34	5.31	-3.92	4.77e-05	0.0008	W02F12.8	hypothetical protein
	18549285	12	10.57	2.68	4.77e-05	0.0008	gln-6	GLutamiNe synthetase (glutamate-ammonia ligase)
	18493700	6.4	7.71	-2.49	4.78e-05	0.0008	C07E3.3	hypothetical protein
	18458037	8.45	7.27	2.26	4.86e-05	0.0008	K09H9.2	hypothetical protein
	18452161	7.11	8.33	-2.32	4.88e-05	0.0008	nmur-4	NMUR (NeuroMedin U Receptor) homolog
	18474025	7.3	4.98	5	4.89e-05	0.0008	W03F11.1	hypothetical protein
	18585304	11.6	10.1	2.84	4.88e-05	0.0008	nasp-2	NASP (human Nuclear Autoantigenic Sperm Protein) homolog
	18609505	7.16	9.3	-4.43	4.88e-05	0.0008	abu-10	Activated in Blocked Unfolded protein response
	18494707	8.77	9.89	-2.17	4.9e-05	0.0008	C18E9.9	hypothetical protein
	18459659	9.46	8.33	2.19	4.94e-05	0.0008	pash-1	PArtner of DroSHa (DRSH-1 interactor)
	18465432	10.49	9.09	2.64	4.95e-05	0.0008	marc-3	MARCH (Membrane-Associated Ring finger (C3HC4)) homolog
	18605443	8.35	9.48	-2.18	4.95e-05	0.0008	C35C5.10	hypothetical protein
	18617186	9.98	11.03	-2.06	4.94e-05	0.0008	Y34B4A.9	hypothetical protein
	18590202	10.99	9.88	2.16	4.95e-05	0.0008	F45F2.11	hypothetical protein
	18629563	5.62	7.23	-3.06	4.97e-05	0.0008	M03F4.6	hypothetical protein
	18517308	6.3	7.53	-2.35	4.99e-05	0.0009	Y42G9A.1	hypothetical protein
	18475727	7.92	9.04	-2.16	5e-05	0.0009	Y47G6A.19	hypothetical protein
	18599780	7.87	6.86	2.02	5.01e-05	0.0009	Y45G5AM.7	hypothetical protein
	18609993	6.23	8.42	-4.55	5.02e-05	0.0009	F40E10.5	hypothetical protein
	18604439	5.7	7.42	-3.29	5.04e-05	0.0009	C23H4.7	Carboxylic ester hydrolase
	18540265	7.85	6.75	2.14	5.05e-05	0.0009	tbce-1	TuBulin folding Cofactor E homolog
	18606538	7.2	5.49	3.27	5.05e-05	0.0009	C53B7.3	hypothetical protein
	18537527	7.93	6.77	2.24	5.07e-05	0.0009	cec-4	C.Elegans Chromodomain protein
	18483576	6.52	8.31	-3.46	5.1e-05	0.0009	pqn-35	Prion-like-(Q/N-rich)-domain-bearing protein
	18591850	8.37	9.41	-2.07	5.12e-05	0.0009	F58H1.7	hypothetical protein
	18485000	12.73	11.39	2.52	5.17e-05	0.0009	puf-5	Pumilio domain-containing protein 5
	18592594	7.01	5.7	2.48	5.19e-05	0.0009	K03B8.8	hypothetical protein
	18555168	4.77	6	-2.35	5.2e-05	0.0009	R09E10.13	hypothetical protein
	18508574	6.58	7.8	-2.33	5.21e-05	0.0009	bas-1	Biogenic Amine Synthesis related
	18527805	8.15	10.53	-5.22	5.23e-05	0.0009	T19C3.2	hypothetical protein
	18530728	8.05	9.56	-2.86	5.23e-05	0.0009	php-3	Posterior Hox gene Paralog
	18632783	5.05	3.89	2.24	5.22e-05	0.0009	W02H3.1	hypothetical protein
	18494264	6.55	5.43	2.17	5.28e-05	0.0009	fbxc-44	F-box C protein
	18490344	4.59	3.57	2.02	5.31e-05	0.0009	Y43F11A.1; Y43F11A.4	hypothetical protein
	18493026	8.15	7.03	2.18	5.3e-05	0.0009	B0432.13	hypothetical protein
	18505258	4.59	3.57	2.02	5.31e-05	0.0009	Y43F11A.1; Y43F11A.4	hypothetical protein
	18578647	5.84	6.95	-2.17	5.31e-05	0.0009	Y39B6A.25	hypothetical protein
	18608708	5.74	6.82	-2.11	5.31e-05	0.0009	F19G12.12	ncRNA
	18505077	7.25	5.63	3.08	5.32e-05	0.0009	nspe-6	Nematode Specific Peptide family, group E
	18547366	11.46	10.04	2.68	5.32e-05	0.0009	ZK616.5	hypothetical protein
	18592512	3.79	5.18	-2.63	5.4e-05	0.0009	K02E2.8	hypothetical protein
	18508939	7	5.39	3.05	5.42e-05	0.0009	C16A3.2	hypothetical protein
	18475499	9.62	8.57	2.07	5.43e-05	0.0009	icp-1	InCenP homolog
	18489961	9.65	8.5	2.22	5.45e-05	0.0009	Y110A2AR.1	Receptor expression-enhancing protein
	18507880	8.51	7.46	2.06	5.5e-05	0.0009	hse-5	D-glucuronyl C5-epimerase
	18558773	7.08	9.83	-6.72	5.62e-05	0.0009	col-137	COLlagen
	18465488	8.79	7.26	2.89	5.63e-05	0.0009	hop-1	Presenilin hop-1
	18483787	6.17	7.19	-2.03	5.64e-05	0.0009	sfxn-1.2	Sideroflexin
	18526573	6.87	5.38	2.81	5.65e-05	0.0009	nth-1	Endonuclease III homolog
	18533906	6.6	8.08	-2.78	5.65e-05	0.0009	C18H7.11	hypothetical protein
	18469164	9.01	7.83	2.26	5.67e-05	0.0009	pole-1	DNA polymerase
	18534890	11.24	10.17	2.11	5.67e-05	0.0009	rfc-3	RFC (DNA replication factor) family
	18528139	7.39	5.72	3.18	5.67e-05	0.0009	T24C4.5	DNA primase
	18600801	4.68	5.74	-2.08	5.75e-05	0.0009	irld-57	Insulin/EGF-Receptor L Domain protein
	18473994	5.88	4.66	2.34	5.77e-05	0.0009	W02D9.7	hypothetical protein
	18530012	7.24	5.87	2.58	5.77e-05	0.0009	Y54F10AM.11	hypothetical protein
	18468988	9.43	10.87	-2.71	5.77e-05	0.0009	cpz-1	CathePsin Z
	18515298	11.18	9.66	2.87	5.79e-05	0.0009	rmd-1	Regulator of microtubule dynamics protein 1
	18633429	10.71	9.18	2.89	5.81e-05	0.0009	Y73B3A.1	hypothetical protein
	18536283	7.62	6.23	2.61	5.81e-05	0.0009
	18633509	9.53	6.87	6.35	5.83e-05	0.0009	Y75D11A.3	hypothetical protein
	18494175	7.03	8.1	-2.09	5.85e-05	0.0009	C14A4.6	hypothetical protein
	18465642	8.28	7.11	2.25	5.88e-05	0.0009	C27A12.6	hypothetical protein
	18458596	9.54	7.77	3.42	5.88e-05	0.0009	cpg-3	Chondroitin proteoglycan 3
	18583840	5.69	4.33	2.58	5.91e-05	0.0009	C17E7.9	hypothetical protein
	18523562	5.19	7.05	-3.63	5.98e-05	0.001	F26A1.9	hypothetical protein
	18464655	5.35	6.54	-2.27	5.97e-05	0.001	B0207.7	hypothetical protein
	18625685	6.28	8.29	-4.03	6e-05	0.001	col-173	COLlagen
	18547745	8.59	7.56	2.04	6.02e-05	0.001	B0001.7	hypothetical protein
	18568737	5.47	3.98	2.82	6.03e-05	0.001	F29G9.1	hypothetical protein
	18558452	9.43	8.25	2.26	6.1e-05	0.001	Y42H9B.3	hypothetical protein
	18497767	11.86	10.37	2.82	6.14e-05	0.001	F18A1.7	hypothetical protein
	18563353	6.98	4.75	4.68	6.13e-05	0.001	C16D9.1	hypothetical protein
	18563992	8	6.89	2.16	6.13e-05	0.001	C27H6.9	Mitochondrial genome maintenance exonuclease 1
	18487986	7.35	5.32	4.08	6.17e-05	0.001	T06D4.1	hypothetical protein
	18582377	4.99	6.82	-3.54	6.18e-05	0.001	ugt-51	UDP-GlucuronosylTransferase
	18573971	7.02	8.42	-2.65	6.21e-05	0.001	R08E5.3	hypothetical protein
	18500789	8.44	6.9	2.89	6.23e-05	0.001	gei-14	GEX Interacting protein
	18558160	6.65	5.54	2.15	6.23e-05	0.001	dnj-26	DNaJ domain (prokaryotic heat shock protein)
	18498531	6.08	8.54	-5.53	6.28e-05	0.001	F33A8.7	hypothetical protein
	18496737	6.76	5.19	2.98	6.32e-05	0.001	EEED8.14	hypothetical protein
	18572518	8.36	7.12	2.36	6.33e-05	0.001	haao-1	3-hydroxyanthranilate 3,4-dioxygenase
	18555288	5.52	4.1	2.68	6.36e-05	0.001	R102.6	hypothetical protein
	18598504	7.44	5.76	3.19	6.41e-05	0.001	Y116F11B.17; linc-51	hypothetical protein; ncRNA
	18547578	9.75	7.02	6.65	6.46e-05	0.001	ZK829.9	hypothetical protein
	18601362	7.84	6.7	2.21	6.5e-05	0.001	ZC317.7	hypothetical protein
	18528412	8.89	9.94	-2.07	6.51e-05	0.001	dnj-24	DNaJ domain (prokaryotic heat shock protein)
	18567238	10.65	12.08	-2.69	6.52e-05	0.001	pud-1.2; pud-1.1	Protein Up-regulated in Daf-2(gf)
	18461969	9.1	7.94	2.23	6.68e-05	0.001	inx-22	Innexin
	18479063	5.6	7.49	-3.7	6.68e-05	0.001	C09F9.2	hypothetical protein
	18617532	7.65	6.03	3.07	6.76e-05	0.001	Y75D11A.2	hypothetical protein
	18538736	8.35	7.1	2.38	6.78e-05	0.001	F52C12.1	Probable tyrosyl-DNA phosphodiesterase
	18515617	7.59	5.45	4.39	6.78e-05	0.001	ttr-7	TransThyretin-Related family domain
	18575221	12.63	11.45	2.27	6.83e-05	0.001	cyb-3	G2/mitotic-specific cyclin-B3
	18628348	6.14	5.09	2.08	6.86e-05	0.001	H35N09.2	hypothetical protein
	18491793	7.01	4.87	4.41	6.91e-05	0.001	nos-2	NanOS related
	18522616	9.43	8.42	2.02	6.9e-05	0.001	C48B4.7	hypothetical protein
	18524443	9.37	8.21	2.23	6.9e-05	0.001	skpt-1	SKP2 (S phase Kinase associated Protein Two) homolog
	18606834	7.77	9.09	-2.5	6.9e-05	0.001	acs-22	fatty Acid CoA Synthetase family
	18530428	6.33	5.14	2.28	6.93e-05	0.001	tbx-33	Putative T-box protein 33
	18534715	9.11	8.06	2.08	6.94e-05	0.001	swd-2.1	Set1 WD40 repeat protein homolog
	18588271	9.87	8.84	2.04	6.94e-05	0.001	rtfo-1	RNA polymerase-associated protein RTF1 homolog
	18475867	6.96	8.38	-2.66	6.95e-05	0.001	Y47H10A.5	hypothetical protein
	18506572	6.23	5.13	2.14	7.03e-05	0.001	Y62F5A.12	hypothetical protein
	18554854	6.75	5.58	2.25	7.09e-05	0.0011	col-135	COLlagen
	18501575	8.01	6.93	2.11	7.22e-05	0.0011	M110.3	hypothetical protein
	18457949	9.77	8.07	3.25	7.31e-05	0.0011	dut-1	DeoxyUTPase
	18624665	7.54	9.69	-4.44	7.35e-05	0.0011	F26A10.2	hypothetical protein
	18452018	9.9	8.77	2.18	7.4e-05	0.0011	rsa-1	Regulator of Spindle Assembly
	18465601	12.9	11.5	2.64	7.51e-05	0.0011	clec-87	C-type lectin domain-containing protein 87
	18499362	10.22	8.86	2.57	7.52e-05	0.0011	egg-3	EGG sterile (unfertilizable)
	18520714	4.31	5.75	-2.71	7.53e-05	0.0011	wht-1	ABC transporter ATP-binding protein/permease wht-1
	18525543	8.34	7.31	2.04	7.54e-05	0.0011	brd-1	BRCA1-associated RING domain protein 1
	18579010	7.72	8.74	-2.03	7.55e-05	0.0011	nlp-25	Neuropeptide-Like Protein
	18616817	7.39	9.2	-3.5	7.56e-05	0.0011	lpr-3	LiPocalin-Related protein
	18597456	4.66	5.92	-2.4	7.58e-05	0.0011	T28C12.6	hypothetical protein
	18564438	3.63	4.8	-2.25	7.65e-05	0.0011	C35A5.10	hypothetical protein
	18604561	6.71	5.24	2.78	7.66e-05	0.0011	C25A11.1	hypothetical protein
	18477914	6.7	4.58	4.34	7.67e-05	0.0011	B0228.1	hypothetical protein
	18458291	9.3	10.31	-2.02	7.69e-05	0.0011	nlp-12	Neuropeptide-Like Protein
	18616634	7.78	9.41	-3.08	7.69e-05	0.0011	pat-9	Paralysed Arrest at Two-fold
	18635129	8.66	10.4	-3.33	7.74e-05	0.0011
	18494465	8.03	6.39	3.13	7.74e-05	0.0011	fbxc-50	F-box C protein
	18559563	6.14	5.01	2.18	7.79e-05	0.0011	aptf-2	AP-2 Transcription Factor family
	18545521	5.84	4.75	2.13	7.81e-05	0.0011	ccch-5	CCCH-type zinc finger putative transcription factor
	18625884	5.11	6.58	-2.77	7.81e-05	0.0011	nspc-9	Nematode Specific Peptide family, group C
	18549752	5.93	8.16	-4.69	7.89e-05	0.0011	col-131	COLlagen
	18502847	7.53	10.2	-6.36	7.91e-05	0.0011	T06D8.10	hypothetical protein
	18465269	5.19	6.8	-3.06	7.96e-05	0.0011	hsp-70	Heat Shock Protein
	18572738	7.56	9.31	-3.35	7.96e-05	0.0011	K07C11.4	Carboxylic ester hydrolase
	18624551	5.81	4.28	2.89	7.97e-05	0.0011	F23D12.2	hypothetical protein
	18598700	10.28	11.65	-2.58	7.99e-05	0.0011	pud-1.2; pud-1.1	Protein Up-regulated in Daf-2(gf)
	18536422	10.14	9.13	2.02	8.05e-05	0.0011	dsb-1	Double-Strand Break factor
	18547796	7.89	9.13	-2.36	8.05e-05	0.0011	B0035.13	hypothetical protein
	18457355	5.94	7.34	-2.65	8.09e-05	0.0011	dhhc-12	Palmitoyltransferase
	18484714	4.82	6.6	-3.43	8.16e-05	0.0012	F49E12.10	hypothetical protein
	18522247	8.4	7.27	2.19	8.15e-05	0.0012	brc-1	BRCa homolog (tumor suppressor gene Brca1)
	18483411	10.94	9.88	2.08	8.28e-05	0.0012	F33H1.3	hypothetical protein
	18617910	7.28	9.77	-5.62	8.31e-05	0.0012	wrt-6	Warthog protein 6
	18520285	7.29	6.24	2.07	8.36e-05	0.0012	B0336.7	hypothetical protein
	18464249	6.15	7.27	-2.17	8.4e-05	0.0012	spe-4	Presenilin spe-4
	18496829	6.9	7.95	-2.07	8.46e-05	0.0012	cyp-37A1	CYtochrome P450 family
	18530318	7.54	6.47	2.1	8.46e-05	0.0012	top-3	DNA topoisomerase 3
	18542800	6.38	4.53	3.61	8.48e-05	0.0012	pes-1	Patterned Expression Site
	18534018	8.33	6.59	3.34	8.51e-05	0.0012	cht-3	Chitinase-like protein C25A8.4
	18477726	9.63	7.65	3.97	8.57e-05	0.0012	clec-91	C-type lectin domain-containing protein 91
	18607229	9.26	7.26	4	8.6e-05	0.0012	F02E8.4	hypothetical protein
	18570591	12.3	10.98	2.49	8.71e-05	0.0012	pos-1	POsterior Segregation
	18595988	8.79	6.92	3.65	8.72e-05	0.0012	T10C6.7	hypothetical protein
	18585667	4.13	5.32	-2.28	8.74e-05	0.0012	C53A3.2	hypothetical protein
	18620622	7.57	4.65	7.54	8.75e-05	0.0012	C27C12.3	hypothetical protein
	18595207	5.17	6.24	-2.1	8.76e-05	0.0012	T04C12.14	ncRNA
	18505912	8.18	6.49	3.22	8.82e-05	0.0012	Y51H7C.15	hypothetical protein
	18633928	7.41	8.57	-2.24	8.81e-05	0.0012	mec-7	Tubulin beta-1 chain
	18466585	9.37	10.42	-2.07	8.83e-05	0.0012	C48B6.10	hypothetical protein
	18500156	9.36	8.26	2.13	8.84e-05	0.0012	F54D5.9	hypothetical protein
	18477692	6.71	7.94	-2.34	8.87e-05	0.0012	ZK849.1	hypothetical protein
	18559518	7.95	6.94	2.01	8.9e-05	0.0012	Y5F2A.4	hypothetical protein
	18619422	4.26	3.22	2.07	8.95e-05	0.0012	C08A9.9	hypothetical protein
	18525988	7.16	8.33	-2.25	9.03e-05	0.0012	hmit-1.3	H(+) MyoInositol coTransporter
	18627158	8.48	9.7	-2.33	9.02e-05	0.0012	F52H2.6	Diminuto-like protein
	18532945	8.19	7.02	2.26	9.07e-05	0.0012	fan-1	Fanconi Anemia-associated Nuclease
	18592473	6.4	8.63	-4.66	9.12e-05	0.0012	K02E11.10	hypothetical protein
	18542134	6.37	4.87	2.83	9.15e-05	0.0012	T12B3.2	hypothetical protein
	18591009	7.55	5.44	4.32	9.21e-05	0.0012	F53F8.3	hypothetical protein
	18479448	4.99	3.79	2.3	9.25e-05	0.0012	C16C8.20	hypothetical protein
	18617029	6.39	4.71	3.2	9.28e-05	0.0012	Y13C8A.1	hypothetical protein
	18619381	5.45	6.49	-2.07	9.28e-05	0.0012	C07B5.8	hypothetical protein
	18524497	9.28	8.22	2.08	9.33e-05	0.0013	polh-1	POLH (DNA polymerase eta) homolog
	18529375	6.02	7.16	-2.19	9.33e-05	0.0013	Y41C4A.8	hypothetical protein
	18626959	7.46	9.79	-5.01	9.33e-05	0.0013	abu-12	Activated in Blocked Unfolded protein response
	18490377	10.13	8.44	3.22	9.44e-05	0.0013	spsb-2	SPSB (SPry and Socs Box) family
	18509753	8.47	7.23	2.36	9.44e-05	0.0013	C35D10.7	hypothetical protein
	18522410	10.07	8.55	2.86	9.42e-05	0.0013	C44B9.3	hypothetical protein
	18479040	5.14	6.89	-3.34	9.46e-05	0.0013	lips-7	LIPaSe related
	18559881	10.4	9.25	2.22	9.49e-05	0.0013	Y67H2A.10	hypothetical protein
	18622639	6.17	7.64	-2.76	9.52e-05	0.0013	dpy-3	DumPY: shorter than wild-type
	18452934	11.34	10.34	2.01	9.55e-05	0.0013	gale-1	UDP-GALactose 4-Epimerase
	18562849	4.8	3.76	2.05	9.67e-05	0.0013	C10G8.4	hypothetical protein
	18569464	8.44	7.4	2.05	9.69e-05	0.0013	duo-1	Deubiquitylating with USP/UBP and OTU domains
	18573349	5.32	7.1	-3.42	9.69e-05	0.0013	K11G9.2	Carboxylic ester hydrolase
	18472336	10.92	9.9	2.04	9.69e-05	0.0013	egg-5	EGG sterile (unfertilizable)
	18554730	8.1	9.11	-2	9.74e-05	0.0013	M04B2.6	hypothetical protein
	18518415	6.97	8.55	-2.99	9.9e-05	0.0013	gly-8	Probable N-acetylgalactosaminyltransferase 8
	18564087	4.47	5.98	-2.86	9.94e-05	0.0013	srx-58	Serpentine Receptor, class X
	18506618	6.88	8.6	-3.3	9.99e-05	0.0013	ZC101.1	hypothetical protein
	18574882	7.69	6.49	2.31	9.99e-05	0.0013	T04H1.5	hypothetical protein
	18614518	5.37	3.63	3.34	0.0001	0.0013	R09A8.1	hypothetical protein
	18576109	9.87	8.87	2	0.0001	0.0013	ima-1	Importin subunit alpha-1
	18583523	6.98	9.22	-4.71	0.0001	0.0013	pqn-13	Prion-like-(Q/N-rich)-domain-bearing protein
	18605784	4.39	5.77	-2.61	0.0001	0.0013	lact-7	beta-LACTamase domain containing
	18593225	7.11	8.47	-2.56	0.0001	0.0013	K10G4.3	hypothetical protein
	18542052	10.18	8.92	2.4	0.0001	0.0014	rme-2	Receptor Mediated Endocytosis
	18519600	5.44	6.47	-2.04	0.0001	0.0014	ZK353.2	hypothetical protein
	18532652	10.9	9.27	3.1	0.0001	0.0014	B0513.4	hypothetical protein
	18565146	10.1	9.02	2.12	0.0001	0.0014	bir-2	BIR (baculovirus inhibitory repeat) family
	18545820	10.14	8.88	2.41	0.0001	0.0014	Y65A5A.2	hypothetical protein
	18475399	6.92	7.97	-2.07	0.0001	0.0014	Y37E3.19	hypothetical protein
	18577319	9.13	7.04	4.24	0.0001	0.0014	W01F3.2	hypothetical protein
	18605288	9.37	10.56	-2.29	0.0001	0.0014	C34E11.15	ncRNA
	18466380	6.52	8.12	-3.04	0.0001	0.0014	C41G7.8	hypothetical protein
	18566806	6.65	4.69	3.89	0.0001	0.0014	clec-7	C-type LECtin
	18522897	5.98	7.12	-2.2	0.0001	0.0014	his-70	Histone H3.3-like type 1
	18621603	8.14	10.18	-4.1	0.0001	0.0014	acn-1	Inactive angiotensin-converting enzyme-related protein
	18595674	7.29	6.27	2.03	0.0001	0.0015	T07C12.12	hypothetical protein
	18500445	6.53	8.56	-4.07	0.0001	0.0015	lips-9	LIPaSe related
	18591013	8.94	7.72	2.34	0.0001	0.0015	F53F8.4	hypothetical protein
	18546196	6.48	7.57	-2.13	0.0001	0.0015
	18485353	7.8	6.52	2.43	0.0001	0.0015	pot-2	Protection Of Telomeres 1 (Pot1) homolog
	18594291	6.22	7.48	-2.39	0.0001	0.0015	R10D12.1	hypothetical protein
	18475976	5.93	4.35	2.99	0.0001	0.0015
	18497331	8.75	10.38	-3.11	0.0001	0.0015	col-17	COLlagen
	18572833	4.78	6.06	-2.43	0.0001	0.0015	cyp-35A5	CYtochrome P450 family
	18540446	4.49	5.77	-2.43	0.0001	0.0015	K08D12.4	hypothetical protein
	18597011	9.95	8.33	3.09	0.0001	0.0015	gyg-2	GlYcoGenin like
	18626196	3.98	5.03	-2.07	0.0001	0.0015	dpy-7	Cuticle collagen dpy-7
	18540327	5.99	7.64	-3.15	0.0001	0.0015	fmo-1	Dimethylaniline monooxygenase [N-oxide-forming]
	18604930	4.88	3.66	2.33	0.0001	0.0015	C28G1.2	hypothetical protein
	18462462	9.57	7.92	3.13	0.0001	0.0015	Y52B11A.8	Phospholipase A2-like protein Y52B11A.8
	18452419	7.7	9.21	-2.84	0.0001	0.0015	pgp-2	P-GlycoProtein related
	18605222	6.48	7.54	-2.09	0.0001	0.0015	C33G3.4	Probable beta-mannosidase
	18575315	6.94	8.49	-2.93	0.0001	0.0015	bus-19	hypothetical protein
	18482174	10	8.26	3.33	0.0001	0.0015	F13D12.3	hypothetical protein
	18577326	7.4	8.63	-2.35	0.0001	0.0016	mlt-11; W01F3.4	hypothetical protein; ncRNA
	18593334	5.89	7.62	-3.32	0.0001	0.0016	cpt-4	Carnitine Palmitoyl Transferase
	18622795	5.5	4.37	2.19	0.0001	0.0016	F02D10.6	hypothetical protein
	18473990	7.42	6.03	2.63	0.0001	0.0016	W02D9.6	hypothetical protein
	18488872	7.43	8.78	-2.54	0.0001	0.0016	vab-19	hypothetical protein
	18541882	8.02	6.84	2.26	0.0001	0.0016	zim-2	Zinc finger In Meiosis
	18551206	9.08	10.13	-2.07	0.0001	0.0016	F13B6.3	hypothetical protein
	18510814	9.08	7.92	2.24	0.0001	0.0016	F10E9.3	hypothetical protein
	18502487	7.79	6.52	2.4	0.0001	0.0016
	18468662	10.57	12.51	-3.83	0.0001	0.0016	dpy-5	Cuticle collagen dpy-5
	18495729	7.31	5.82	2.8	0.0001	0.0016	C41H7.9	hypothetical protein
	18498201	4.7	6.02	-2.49	0.0001	0.0016	nep-12	NEPrilysin metallopeptidase family
	18511161	5.63	4.38	2.38	0.0001	0.0016	F23F12.3	hypothetical protein
	18562318	7.9	9.84	-3.83	0.0001	0.0016	fkb-3	Peptidyl-prolyl cis-trans isomerase
	18511633	6.74	7.77	-2.04	0.0001	0.0016	F37A4.5	hypothetical protein
	18520293	10.46	9.39	2.09	0.0001	0.0016	lgg-3	Ubiquitin-like protein ATG12
	18516420	5.32	3.66	3.14	0.0001	0.0016	Y111B2A.2	hypothetical protein
	18602815	9.04	10.1	-2.09	0.0001	0.0016	nspc-6; nspc-2	Nematode Specific Peptide family, group C
	18619006	9.04	10.1	-2.09	0.0001	0.0016	nspc-6; nspc-2	Nematode Specific Peptide family, group C
	18626744	7.84	6.43	2.67	0.0001	0.0016	F48E3.4	hypothetical protein
	18530482	8.35	7.23	2.17	0.0001	0.0016	Y66D12A.6	hypothetical protein
	18526423	5.45	6.89	-2.73	0.0001	0.0016	nac-2	NADC (Na+-coupled dicarboxylate transporter) family
	18465496	9.25	7.96	2.45	0.0001	0.0017	C18E3.9	hypothetical protein
	18563706	6.86	8.13	-2.42	0.0001	0.0017	C25D7.5	hypothetical protein
	18614817	6.1	7.55	-2.73	0.0001	0.0017	T01B6.1	hypothetical protein
	18544530	9.9	8.23	3.2	0.0001	0.0017	cyb-2.1	CYclin B
	18558507	9.49	8.44	2.06	0.0001	0.0017	Y43D4A.3; Y43D4A.4	hypothetical protein
	18504527	10.17	11.85	-3.22	0.0001	0.0017	mlt-8	hypothetical protein
	18535524	5.06	6.21	-2.23	0.0001	0.0017	C49A9.5	hypothetical protein
	18496809	6.17	8.08	-3.76	0.0001	0.0017	F01D5.10	hypothetical protein
	18473582	8.04	6.63	2.65	0.0001	0.0017	T24D1.3	hypothetical protein
	18626720	5.97	4.74	2.35	0.0002	0.0017	F48E3.2	hypothetical protein
	18595523	5.57	6.76	-2.27	0.0002	0.0017	cgt-1	Ceramide glucosyltransferase 1
	18506231	5.75	6.79	-2.05	0.0002	0.0017	Y54E2A.9	hypothetical protein
	18589573	7.55	6.45	2.14	0.0002	0.0017	F36H9.4	hypothetical protein
	18578760	5.24	6.41	-2.25	0.0002	0.0018	Y39B6A.9	hypothetical protein
	18490252	7.31	9.42	-4.31	0.0002	0.0018	ptr-18	PaTched Related family
	18494261	5.68	4.62	2.08	0.0002	0.0018	C15F1.8	hypothetical protein
	18618604	7.76	8.88	-2.18	0.0002	0.0018	B0410.3	hypothetical protein
	18546297	5.42	4.05	2.58	0.0002	0.0018	linc-29	ncRNA
	18609727	4.27	6.55	-4.87	0.0002	0.0018	col-172	COLlagen
	18628474	10.91	8.17	6.68	0.0002	0.0018	meg-1	hypothetical protein
	18543104	5.83	7.18	-2.56	0.0002	0.0018	W08E12.3	hypothetical protein
	18562116	6.64	4.4	4.7	0.0002	0.0018	clec-223	C-type LECtin
	18516555	8.83	9.87	-2.06	0.0002	0.0018	Y119D3B.21	hypothetical protein
	18543723	7.81	6.76	2.06	0.0002	0.0018	Y24F12A.1	hypothetical protein
	18558894	4.6	5.77	-2.25	0.0002	0.0018	lad-2	L1 CAM ADhesion molecule homolog
	18518612	8.3	9.31	-2.02	0.0002	0.0018	alh-12	ALdehyde deHydrogenase
	18567209	5.82	7.86	-4.11	0.0002	0.0018	F15B9.8	hypothetical protein
	18474786	6.93	5.71	2.32	0.0002	0.0018	Y106G6D.5; Y106G6D.6	hypothetical protein
	18594770	9.62	7.86	3.38	0.0002	0.0018	T01C3.3	hypothetical protein
	18618641	7.88	5.29	6.01	0.0002	0.0018	B0416.7	hypothetical protein
	18619282	6	7.15	-2.22	0.0002	0.0018	C05G5.7	hypothetical protein
	18505996	8.96	7.66	2.46	0.0002	0.0018	Y53C12A.11	hypothetical protein
	18535712	8.95	7.88	2.09	0.0002	0.0018	C49H3.6	hypothetical protein
	18506034	3.87	4.93	-2.08	0.0002	0.0018	Y53C12A.8	hypothetical protein
	18589031	10.88	9.64	2.36	0.0002	0.0019	neg-1	Negative Effect on Gut development
	18568819	5.63	6.81	-2.27	0.0002	0.0019	F31F4.1	hypothetical protein
	18632339	4.5	6.39	-3.68	0.0002	0.0019	T24C12.4	hypothetical protein
	18488327	9.64	8.1	2.91	0.0002	0.0019	gpd-1	Glyceraldehyde-3-phosphate dehydrogenase 1
	18595810	8.9	10	-2.15	0.0002	0.0019	mtl-2	Metallothionein-2
	18605612	5.05	6.36	-2.49	0.0002	0.0019	C36E6.8	hypothetical protein
	18591358	6.04	7.32	-2.43	0.0002	0.0019	daam-1	DAAM (Disheveled-Associated Activator of Morphogenesis) homolog
	18464889	11.15	9.71	2.71	0.0002	0.0019	C01G8.1	hypothetical protein
	18505788	4.94	3.92	2.03	0.0002	0.0019	Y49F6C.8	hypothetical protein
	18482276	8.11	6.6	2.84	0.0002	0.0019	bath-27	BTB and MATH domain containing
	18549213	8.21	4.86	10.22	0.0002	0.0019	C27B7.9	hypothetical protein
	18592103	6.64	7.75	-2.16	0.0002	0.0019	clec-229	C-type LECtin
	18473486	6.01	4.79	2.34	0.0002	0.0019
	18599606	7.06	8.16	-2.14	0.0002	0.002	Y43F8C.13	hypothetical protein
	18580303	11.68	10.54	2.21	0.0002	0.002	Y75B12B.1	hypothetical protein
	18495222	6.48	8.27	-3.48	0.0002	0.002	C31C9.2	hypothetical protein
	18600636	4.61	6	-2.63	0.0002	0.002	Y68A4A.13	hypothetical protein
	18462850	6.95	8.46	-2.83	0.0002	0.002	Y65B4BL.1	hypothetical protein
	18484034	4.16	5.27	-2.16	0.0002	0.002	F41G3.3	hypothetical protein
	18466050	8.49	9.98	-2.82	0.0002	0.002	noah-1	NOmpA Homolog (Drosophila nompA: no mechanoreceptor potential A)
	18626595	8.13	6.73	2.65	0.0002	0.002	F47B7.7	hypothetical protein
	18491324	8.93	7.49	2.72	0.0002	0.002	Y54G9A.5	hypothetical protein
	18487577	8.42	7.34	2.12	0.0002	0.002	psf-1	Probable DNA replication complex GINS protein PSF1
	18616740	5.91	7.15	-2.35	0.0002	0.0021	lpr-6	LiPocalin-Related protein
	18514293	8.58	7.3	2.42	0.0002	0.0021	R02F2.4	hypothetical protein
	18608371	7.5	6.47	2.04	0.0002	0.0021	F16B12.6	hypothetical protein
	18617379	5.28	6.51	-2.35	0.0002	0.0021	Y70D2A.1	hypothetical protein
	18457549	8.14	7.11	2.05	0.0002	0.0021	cyb-2.2	CYclin B
	18468095	9.88	8.74	2.2	0.0002	0.0021	F20G4.2	hypothetical protein
	18615016	4.78	6.62	-3.58	0.0002	0.0021	T03G6.1	hypothetical protein
	18522471	7.47	4.92	5.85	0.0002	0.0021	C45G9.12	hypothetical protein
	18594262	7.35	8.38	-2.04	0.0002	0.0021	flp-34	FMRF-Like Peptide
	18482299	6.49	5.46	2.05	0.0002	0.0021	bath-29	BTB and MATH domain containing
	18478312	6.94	8.89	-3.85	0.0002	0.0021	sqt-2	SQuaT
	18512081	4.39	6.09	-3.25	0.0002	0.0021	nas-1	Zinc metalloproteinase nas-1
	18516460	8.13	7.13	2	0.0002	0.0021	sas-1	hypothetical protein
	18532321	4.35	5.38	-2.04	0.0002	0.0021	fbxa-6	F-box A protein
	18616764	6.86	8.43	-2.98	0.0002	0.0021	lpr-4	LiPocalin-Related protein
	18623632	8.02	9.18	-2.24	0.0002	0.0022	F14B8.5	hypothetical protein
	18512040	8.02	6.86	2.23	0.0002	0.0022	F43D9.8	ncRNA
	18567935	10.6	12.25	-3.15	0.0002	0.0022	sqt-3	Cuticle collagen 1
	18523034	8.02	6.81	2.32	0.0002	0.0022	F08F8.4	hypothetical protein
	18515354	10.08	8.96	2.18	0.0002	0.0022	ttr-15	Transthyretin-like protein 15
	18564223	5.38	3.83	2.93	0.0002	0.0022	C31G12.1	hypothetical protein
	18569391	7.39	8.39	-2	0.0002	0.0022	pha-4	Defective pharyngeal development protein 4
	18497783	9.05	7.66	2.62	0.0002	0.0022	puf-6	Pumilio domain-containing protein 6
	18517908	5.09	4.03	2.09	0.0002	0.0022	Y49E10.29	hypothetical protein
	18541971	5.46	6.7	-2.36	0.0002	0.0022	T08B6.9	hypothetical protein
	18622202	3.35	4.46	-2.16	0.0002	0.0022	C54D2.15	ncRNA
	18522274	6.72	7.89	-2.25	0.0002	0.0022	glb-11	GLoBin related
	18528905	6.96	8.13	-2.24	0.0002	0.0022	dhs-9	DeHydrogenases, Short chain
	18598275	5.33	4.06	2.41	0.0002	0.0022	fbxa-206	F-box A protein
	18596403	7.92	9.01	-2.13	0.0002	0.0022	T16G1.9	hypothetical protein
	18488608	5.39	6.5	-2.15	0.0002	0.0022	tsp-10	TetraSPanin family
	18494326	7.06	9.3	-4.74	0.0002	0.0023	skpo-2	ShK domain and PerOxidase domain containing protein
	18480337	6.69	8.86	-4.51	0.0002	0.0023	C34C6.3	hypothetical protein
	18627010	8.75	5.87	7.37	0.0002	0.0023	rgs-8.2; rgs-8.1	Regulator of G protein Signaling
	18633269	8.75	5.87	7.37	0.0002	0.0023	rgs-8.2; rgs-8.1	Regulator of G protein Signaling
	18451589	7.11	8.82	-3.26	0.0002	0.0023	ugt-25	UDP-glucuronosyltransferase
	18584457	4.56	6.22	-3.16	0.0002	0.0023	clec-230	C-type LECtin
	18542388	4.99	6.56	-2.97	0.0002	0.0023	bus-4	hypothetical protein
	18476995	5.46	6.53	-2.1	0.0002	0.0023	Y71G12B.33	hypothetical protein
	18468885	9.65	8.65	2	0.0002	0.0023	F31C3.3	hypothetical protein
	18618160	4.4	5.7	-2.46	0.0002	0.0023	ZK662.6	hypothetical protein
	18452774	9.57	8.54	2.04	0.0002	0.0023	met-1	Histone-lysine N-methyltransferase
	18537097	11.11	9.85	2.4	0.0002	0.0023	gfat-2	Glutamine-Fructose 6-phosphate AminoTransferase homolog
	18580589	6.06	7.23	-2.25	0.0002	0.0023	cln-3.3	Battenin
	18488965	6.13	5.01	2.19	0.0002	0.0023	T24E12.1	hypothetical protein
	18584449	6.93	5.8	2.19	0.0002	0.0023	C29F3.3	hypothetical protein
	18576575	5.67	6.95	-2.44	0.0002	0.0023	wago-10	Piwi-like protein
	18521602	6.42	7.5	-2.11	0.0002	0.0023	C23G10.6	UDP-glucuronosyltransferase
	18510167	5.59	6.67	-2.11	0.0002	0.0024	C45G9.6	hypothetical protein
	18635645	5.1	3.82	2.42	0.0002	0.0024
	18559414	6.88	5.52	2.58	0.0002	0.0024	Y57G11C.51	hypothetical protein
	18590594	6.69	5.33	2.57	0.0002	0.0024	lsy-27	hypothetical protein
	18604568	7.14	5.47	3.18	0.0002	0.0024	C25A11.10	hypothetical protein
	18510413	7.72	8.72	-2	0.0002	0.0024	D2007.1	hypothetical protein
	18465099	6.63	5.39	2.36	0.0002	0.0024	C06A5.12	hypothetical protein
	18491394	6.83	8.79	-3.91	0.0002	0.0024	Y57A10A.23	hypothetical protein
	18609226	4.85	5.9	-2.06	0.0002	0.0025	F29G6.1	hypothetical protein
	18552254	6.55	5.42	2.19	0.0002	0.0025	clec-165	C-type LECtin
	18553946	7.38	5.09	4.89	0.0003	0.0025	col-101	COLlagen
	18614565	5.94	7.02	-2.11	0.0003	0.0025	R09F10.17	ncRNA
	18546727	6.06	7.65	-3.01	0.0003	0.0025	Y77E11A.14	hypothetical protein
	18580503	6.41	4.78	3.09	0.0003	0.0025	ZC116.1	hypothetical protein
	18483380	4.81	6.09	-2.44	0.0003	0.0025	F33A8.10	hypothetical protein
	18599247	10.21	9.02	2.29	0.0003	0.0025	Y39B6A.42	hypothetical protein
	18559581	4.62	5.94	-2.49	0.0003	0.0025	Y62E10A.3	hypothetical protein
	18480565	7.61	6.59	2.04	0.0003	0.0025	C41H7.6	hypothetical protein
	18523201	7.52	8.83	-2.47	0.0003	0.0025	F10F2.2	Probable phosphoribosylformylglycinamidine synthase
	18558523	11.47	10.11	2.56	0.0003	0.0025	puf-3	PUF (Pumilio/FBF) domain-containing
	18474216	12.49	11.15	2.54	0.0003	0.0025	W05F2.3	hypothetical protein
	18555537	4.91	6.72	-3.49	0.0003	0.0025	ant-1.4	Adenine Nucleotide Translocator
	18590753	4.81	5.83	-2.02	0.0003	0.0025	hsp-17	Heat Shock Protein
	18534447	6.94	8.07	-2.18	0.0003	0.0026	nhr-43	Nuclear Hormone Receptor family
	18506114	7.18	8.27	-2.14	0.0003	0.0026	elo-9	Elongation of very long chain fatty acids protein
	18628495	4	5.16	-2.22	0.0003	0.0026	K02D3.2	hypothetical protein
	18536321	3.6	4.82	-2.32	0.0003	0.0026	F07C6.2	hypothetical protein
	18500849	5.89	7.36	-2.77	0.0003	0.0026	ltd-1	Lim and Transglutaminase Domain
	18492063	8.75	7.45	2.46	0.0003	0.0026	ZK1307.9	Coiled-coil domain-containing protein 130 homolog
	18524622	8.86	7.75	2.15	0.0003	0.0026	ska-3	Spindle and Kinetochore-Associated protein homolog
	18550799	5.26	4.09	2.25	0.0003	0.0026	F01D4.8	hypothetical protein
	18555257	4.19	5.76	-2.98	0.0003	0.0026	R102.11	hypothetical protein
	18452402	10.06	8.91	2.21	0.0003	0.0027	tyr-4	TYRosinase
	18509210	8.16	7.13	2.05	0.0003	0.0027	flh-2	FLYWCH zinc finger transcription factor homolog
	18508678	4.56	5.97	-2.65	0.0003	0.0027	C06G4.6	hypothetical protein
	18559643	7.35	8.58	-2.35	0.0003	0.0027	hum-8	Heavy chain, Unconventional Myosin
	18601002	5.44	6.97	-2.88	0.0003	0.0027	Y75B7AR.1	hypothetical protein
	18510133	5.67	6.79	-2.18	0.0003	0.0027	C45G9.13	hypothetical protein
	18525630	6.54	8.64	-4.31	0.0003	0.0027	K04H4.2	hypothetical protein
	18499093	7.34	5.91	2.7	0.0003	0.0027	F41G3.10	hypothetical protein
	18523887	7.22	8.38	-2.24	0.0003	0.0028	nlp-10	Neuropeptide-Like Protein
	18520160	13.26	12.18	2.11	0.0003	0.0028	cpg-2	Chondroitin proteoglycan-2
	18612286	4.68	6.58	-3.73	0.0003	0.0028	F59F5.7	hypothetical protein
	18541182	5.25	4.17	2.11	0.0003	0.0028	R07H5.11	hypothetical protein
	18544500	8.97	7.8	2.25	0.0003	0.0028	Y43D4A.3; Y43D4A.4	hypothetical protein
	18475832	6.03	7.1	-2.09	0.0003	0.0028	Y47G6A.30	hypothetical protein
	18475161	4.13	5.3	-2.24	0.0003	0.0028	col-46	COLlagen
	18564164	6.38	7.45	-2.11	0.0003	0.0028	oac-6	O-ACyltransferase homolog
	18540722	5.04	6.29	-2.39	0.0003	0.0029	M01H9.5	hypothetical protein
	18603902	6.17	7.19	-2.03	0.0003	0.0029	C15B12.1	Putative sarcosine oxidase
	18526338	5.13	6.36	-2.34	0.0003	0.0029	R06B10.1	pseudo
	18555610	7.24	8.28	-2.05	0.0003	0.0029	pmp-4	Peroxisomal Membrane Protein related
	18489005	4.95	6.13	-2.27	0.0003	0.0029	T24E12.5	hypothetical protein
	18589038	9.59	7.92	3.18	0.0003	0.0029	F32D1.7	hypothetical protein
	18551928	6.9	8.79	-3.7	0.0003	0.0029	col-111	COLlagen
	18576126	3.85	5.26	-2.67	0.0003	0.0029	mam-4	MAM (Meprin, A5-protein, PTPmu) domain protein
	18470777	4.45	5.56	-2.15	0.0003	0.0029	F56G4.7	hypothetical protein
	18534841	7.1	8.33	-2.35	0.0003	0.0029	C35B1.7	hypothetical protein
	18599849	4.74	2.76	3.95	0.0003	0.003	Y46H3C.7	hypothetical protein
	18454535	9.79	8.77	2.03	0.0003	0.003	F22G12.5	hypothetical protein
	18502123	3.98	5.21	-2.34	0.0003	0.003	R12C12.10	hypothetical protein
	18532922	7.43	6.16	2.42	0.0003	0.003	C01G5.5	hypothetical protein
	18567241	11	12.09	-2.12	0.0003	0.003	pud-2.2; pud-2.1	Protein Up-regulated in Daf-2(gf)
	18587324	11	12.09	-2.12	0.0003	0.003	pud-2.2; pud-2.1	Protein Up-regulated in Daf-2(gf)
	18521864	7.25	6.12	2.19	0.0003	0.003	C28A5.2	hypothetical protein
	18619226	6.34	8.09	-3.37	0.0003	0.003	C05E7.1	hypothetical protein
	18617799	7.33	5.61	3.29	0.0003	0.003	rgs-9	Regulator of G-protein signaling rgs-9
	18551181	3.84	5.18	-2.53	0.0003	0.003	F13B12.4	Putative pyridoxal-phosphate dependent protein F13B12.4
	18562087	3.16	4.81	-3.13	0.0003	0.0031	abu-15	Activated in Blocked Unfolded protein response
	18601746	7.17	6.07	2.14	0.0003	0.0031	ZK1037.6	hypothetical protein
	18567885	5.07	6.26	-2.29	0.0003	0.0031	F23B12.1	Serine/threonine-protein phosphatase
	18552849	8	9.16	-2.24	0.0003	0.0031	F49C12.7	hypothetical protein
	18478554	6.37	7.57	-2.3	0.0003	0.0031	C04G6.10	hypothetical protein
	18585264	4.19	5.19	-2	0.0003	0.0031	C49G7.1	hypothetical protein
	18488478	5.24	6.8	-2.94	0.0003	0.0031	T13C2.2	hypothetical protein
	18505216	6.33	5.26	2.1	0.0004	0.0032	Y39G8B.2	hypothetical protein
	18530984	6.54	5.34	2.3	0.0004	0.0032	Y76A2B.7	ncRNA
	18529507	5.22	6.62	-2.64	0.0004	0.0032	Y46E12A.5	hypothetical protein
	18545942	7.64	6.6	2.06	0.0004	0.0032	Y67D8C.3	hypothetical protein
	18564128	6.07	5.03	2.06	0.0004	0.0032	hil-1	Histone H1.X
	18514784	6.47	5.16	2.48	0.0004	0.0032	kbp-1	KNL (kinetochore null) Binding Protein
	18551801	6.42	8.07	-3.13	0.0004	0.0032	aat-1	Amino Acid Transporter
	18456827	7.24	6.21	2.04	0.0004	0.0032	fncm-1	FANCM (Fanconi anemia complex component M) homolog
	18611199	7.88	9.63	-3.37	0.0004	0.0033	F49H12.5	hypothetical protein
	18629126	4.81	6.07	-2.4	0.0004	0.0033	K09C8.7	hypothetical protein
	18524961	7.45	8.61	-2.23	0.0004	0.0033	gei-13	Gex-3-interacting protein 13
	18627216	9.3	11.29	-3.97	0.0004	0.0033	F53B1.4	hypothetical protein
	18500134	4.8	5.81	-2	0.0004	0.0033	F54D5.15	hypothetical protein
	18598890	5.57	7.36	-3.45	0.0004	0.0034	Y32G9B.1	hypothetical protein
	18473986	5.58	4.34	2.37	0.0004	0.0034	ssp-37	Sperm Specific family, class P
	18535775	5.61	6.66	-2.08	0.0004	0.0034	C52D10.3	hypothetical protein
	18570672	7.42	8.47	-2.08	0.0004	0.0034	F53C11.1	hypothetical protein
	18530290	7.6	6.57	2.05	0.0004	0.0034	Y56A3A.16	hypothetical protein
	18553578	9.89	8.57	2.5	0.0004	0.0034	H02I12.5	hypothetical protein
	18548067	4.74	5.82	-2.13	0.0004	0.0034	C01B10.10	hypothetical protein
	18505003	3.92	4.98	-2.09	0.0004	0.0034	Y27F2A.9	hypothetical protein
	18546377	9.71	8.7	2	0.0004	0.0035	puf-11	PUF (Pumilio/FBF) domain-containing
	18482757	6.77	5.54	2.34	0.0004	0.0035	F21H12.8	ncRNA
	18475011	6.19	7.2	-2.01	0.0004	0.0035	Y110A7A.21	hypothetical protein
	18509978	4.65	3.55	2.14	0.0004	0.0035	fbxa-62	F-box A protein
	18501837	5.35	4.28	2.11	0.0004	0.0035	R05G9.3	hypothetical protein
	18602296	7.83	9.71	-3.66	0.0004	0.0036	wrt-9	WaRThog (hedgehog-like family)
	18561911	5.55	4.54	2.02	0.0004	0.0036	C01B4.8; Y19D10A.5	hypothetical protein
	18578251	5.55	4.54	2.02	0.0004	0.0036	C01B4.8; Y19D10A.5	hypothetical protein
	18499672	7.48	8.7	-2.33	0.0004	0.0036	lin-42	Period protein homolog lin-42
	18608934	5.06	6.12	-2.08	0.0004	0.0036	pgp-13	P-GlycoProtein related
	18608896	7.74	9.2	-2.76	0.0004	0.0036	ttr-35	TransThyretin-Related family domain
	18529744	8.68	7.38	2.47	0.0004	0.0036	Y48A6B.7	hypothetical protein
	18470183	9.1	8.04	2.09	0.0004	0.0036	F52B5.3	hypothetical protein
	18496983	4.89	7.37	-5.56	0.0004	0.0036	dct-5	Protein dct-5
	18535641	7.39	6.34	2.07	0.0004	0.0036	C49C3.7	hypothetical protein
	18491992	8.29	9.83	-2.91	0.0004	0.0036	rol-8	Cuticle collagen 6
	18475849	4.27	3.23	2.06	0.0004	0.0037	Y47H10A.2	hypothetical protein
	18578054	6.94	5.87	2.11	0.0004	0.0037	fog-2	Feminization Of Germline
	18493095	4.53	6.15	-3.07	0.0004	0.0037	B0454.8	hypothetical protein
	18511011	6.91	8.23	-2.49	0.0004	0.0037	col-89	COLlagen
	18530963	8.5	7.48	2.03	0.0004	0.0037	Y76A2B.4	hypothetical protein
	18571508	6.28	4.74	2.91	0.0004	0.0037	F58D12.1; T08G5.19	hypothetical protein; ncRNA
	18613794	8.94	10.16	-2.33	0.0004	0.0037	M163.15	ncRNA
	18499749	8.68	6.99	3.24	0.0005	0.0039	skpo-1	Peroxidase skpo-1
	18543022	9.28	7.38	3.71	0.0005	0.0039	grd-3	GRounDhog (hedgehog-like family)
	18511676	6.79	8.03	-2.37	0.0005	0.0039	F37A8.5	Protein yippee-like F37A8.5
	18474429	4.43	5.57	-2.2	0.0005	0.0039	W10C8.3	hypothetical protein
	18506305	6.16	5.13	2.04	0.0005	0.0039	Y54G9A.4	hypothetical protein
	18591323	6.21	7.54	-2.51	0.0005	0.004	F56A4.13	ncRNA
	18616135	4.69	5.71	-2.03	0.0005	0.004	T22B7.8	hypothetical protein
	18470715	7.28	8.97	-3.23	0.0005	0.004	ptr-11	PaTched Related family
	18521356	8.77	7.62	2.21	0.0005	0.004	C14B1.9	hypothetical protein
	18625316	4.97	6.21	-2.37	0.0005	0.004	F38B2.6	hypothetical protein
	18627869	4.15	5.38	-2.35	0.0005	0.0041	F57G12.2	hypothetical protein
	18555332	7.51	6.5	2.01	0.0005	0.0041	R11A8.1	hypothetical protein
	18565042	3.4	5.04	-3.12	0.0005	0.0041	C49G7.12	hypothetical protein
	18634182	5.22	6.45	-2.34	0.0005	0.0041	ZK678.11	ncRNA
	18615377	8.29	6.82	2.78	0.0005	0.0041	ttr-30	TransThyretin-Related family domain
	18552947	7.63	6.61	2.03	0.0005	0.0041	F49F1.7	hypothetical protein
	18551434	5.23	6.67	-2.72	0.0005	0.0041	col-110	COLlagen
	18631698	4.2	5.76	-2.95	0.0005	0.0041	T14E8.4	hypothetical protein
	18527529	8.38	9.43	-2.06	0.0005	0.0042	fbxa-59	F-box A protein
	18468332	8.72	7.57	2.22	0.0005	0.0042	maph-1.2	Microtubule-Associated Protein Homolog
	18530620	5.88	7.4	-2.88	0.0005	0.0042	Y71H2AM.15	hypothetical protein
	18600379	7.05	9.12	-4.22	0.0005	0.0044	lon-8	LONg
	18499829	5.1	4.09	2.01	0.0005	0.0044	bath-4	BTB and MATH domain containing
	18561144	4.47	6.62	-4.44	0.0005	0.0044	lips-6	LIPaSe related
	18576182	3.62	4.71	-2.13	0.0005	0.0044	T19C9.8	hypothetical protein
	18613652	7.69	8.85	-2.22	0.0006	0.0044	clec-265	C-type LECtin
	18583083	6.32	7.33	-2.02	0.0006	0.0044	fut-8	Alpha-(1,6)-fucosyltransferase
	18509354	4.47	6.21	-3.33	0.0006	0.0044	C28H8.5	hypothetical protein
	18537150	6.95	9.05	-4.31	0.0006	0.0044	bed-3	BED-type zinc finger putative transcription factor
	18454869	5.35	4.04	2.47	0.0006	0.0045	F26E4.18	ncRNA
	18482326	6.97	8.16	-2.28	0.0006	0.0045	lips-10	LIPaSe related
	18484617	5.41	6.5	-2.13	0.0006	0.0045	chs-2	CHitin Synthase
	18501848	5.36	7.36	-4	0.0006	0.0045	R05G9R.1	hypothetical protein
	18629024	8.22	9.23	-2.02	0.0006	0.0045
	18558758	7.29	8.31	-2.03	0.0006	0.0045	Y51H4A.7	Probable urocanate hydratase
	18559748	4.41	5.57	-2.23	0.0006	0.0045	paqr-3	Progestin and AdipoQ Receptor family
	18490770	5.67	6.75	-2.12	0.0006	0.0046	Y49F6B.15	ncRNA
	18580703	5.65	7.37	-3.3	0.0006	0.0046	cyn-17	CYclophyliN
	18584527	7.33	5.75	3.01	0.0006	0.0046	C31B8.8	hypothetical protein
	18566529	4.73	5.91	-2.26	0.0006	0.0046	F09C6.12	hypothetical protein
	18469493	6.51	7.69	-2.26	0.0006	0.0046	F36H2.3	hypothetical protein
	18535766	5.04	6.08	-2.06	0.0006	0.0046	C52D10.3	hypothetical protein
	18582801	6.16	7.48	-2.51	0.0006	0.0046	C06B8.2	hypothetical protein
	18536517	5.48	7.65	-4.52	0.0006	0.0047	nas-14	Zinc metalloproteinase nas-14
	18557545	3.39	5.11	-3.29	0.0006	0.0047	Y11D7A.5	hypothetical protein
	18468162	8.95	7.93	2.02	0.0006	0.0047	rde-2	hypothetical protein
	18600057	5.66	6.67	-2.02	0.0006	0.0047	Y50E8A.12	hypothetical protein
	18454483	4.14	5.17	-2.05	0.0006	0.0047	gly-19	GLYcosylation related
	18483928	7.65	6.11	2.89	0.0006	0.0048	F40H3.2	hypothetical protein
	18491133	5.95	7.94	-3.97	0.0006	0.0048	Y53F4B.27	hypothetical protein
	18521969	7.89	6.64	2.38	0.0006	0.0048	C29E4.13	hypothetical protein
	18545423	9.32	7.09	4.69	0.0006	0.0048	Y57G11B.5	hypothetical protein
	18554217	8.38	9.44	-2.08	0.0006	0.0049	K08D8.3	hypothetical protein
	18581777	5.18	6.33	-2.22	0.0006	0.0049	cyp-34A9	CYtochrome P450 family
	18552159	7.2	9.08	-3.67	0.0006	0.0049	col-34	Cuticle collagen 34
	18617899	7.8	9.17	-2.58	0.0007	0.0051	ZK154.1	hypothetical protein
	18613139	7.9	6.81	2.14	0.0007	0.0052	K08B5.1	hypothetical protein
	18536216	5.68	7.38	-3.26	0.0007	0.0052	F01G10.10	hypothetical protein
	18621379	11.91	10.78	2.19	0.0007	0.0052	C39D10.7	hypothetical protein
	18600143	6.77	5.4	2.59	0.0007	0.0052	ttr-26	TransThyretin-Related family domain
	18457277	8.61	10.06	-2.73	0.0007	0.0053	F58H10.1	hypothetical protein
	18543288	4.27	6.41	-4.4	0.0007	0.0053	pqn-79; pqn-76; abu-5; pqn-78	Prion-like-(Q/N-rich)-domain-bearing protein; Activated in Blocked Unfolded protein response
	18619185	9.04	7.3	3.33	0.0007	0.0053	C05D9.9	hypothetical protein
	18561519	6.74	4.28	5.51	0.0007	0.0053	nlp-28	GMYGGW-amide
	18628217	9.47	7.97	2.84	0.0007	0.0054	tbh-1	Tyramine Beta Hydroxylase
	18471865	6.68	5.51	2.25	0.0007	0.0054	klp-15	Kinesin-like protein
	18470007	5.81	4.79	2.03	0.0007	0.0054	gadr-6	hypothetical protein
	18459590	10.66	9.45	2.31	0.0007	0.0055	egg-4	EGG sterile (unfertilizable)
	18463990	7.05	8.78	-3.34	0.0007	0.0055	ZK1025.2; ZK1025.8	hypothetical protein
	18477431	7.05	8.78	-3.34	0.0007	0.0055	ZK1025.2; ZK1025.8	hypothetical protein
	18563438	6.74	4.98	3.38	0.0007	0.0055	C17E7.4	hypothetical protein
	18545074	7.89	8.95	-2.08	0.0007	0.0056	samt-1	SAM (S-Adenosyl Methionine) Transporter
	18524946	7.04	8.97	-3.81	0.0007	0.0056	abu-13	Activated in Blocked Unfolded protein response
	18456907	5.87	6.93	-2.08	0.0008	0.0056	F56C11.6	Carboxylic ester hydrolase
	18487861	7.39	6.27	2.16	0.0008	0.0056	T05A7.1	hypothetical protein
	18616541	9.02	7.3	3.3	0.0008	0.0056	T25G12.3	hypothetical protein
	18626695	6.32	7.48	-2.23	0.0008	0.0056	F48C5.2	hypothetical protein
	18613693	6.52	7.78	-2.39	0.0008	0.0057	M03A8.3	hypothetical protein
	18526666	7.3	5.84	2.73	0.0008	0.0057	ttr-8	TransThyretin-Related family domain
	18621723	2.79	3.84	-2.08	0.0008	0.0057	col-180	COLlagen
	18534782	6.66	7.77	-2.16	0.0008	0.0057	C34H4.1	hypothetical protein
	18625497	4.02	5.73	-3.29	0.0008	0.0057	nas-13	Zinc metalloproteinase nas-13
	18510852	5.04	6.53	-2.8	0.0008	0.0057	lips-3	LIPaSe related
	18584016	5.89	7.87	-3.94	0.0008	0.0058	ptr-1	PaTched Related family
	18612127	5.78	6.89	-2.16	0.0008	0.0058	cdh-9	CaDHerin family
	18538940	8.95	7.06	3.7	0.0008	0.0058	F55B11.3	hypothetical protein
	18617617	5.56	7.61	-4.13	0.0008	0.0058	dao-4	Dauer or Aging adult Overexpression
	18628595	9.16	7.77	2.62	0.0008	0.0059	aqp-8	AQuaPorin or aquaglyceroporin related
	18484657	5.82	7.79	-3.93	0.0008	0.0059	F49C5.11	hypothetical protein
	18582119	4.28	5.55	-2.41	0.0008	0.0059	oac-1	O-ACyltransferase homolog
	18515724	7.23	6.21	2.04	0.0008	0.006	T20G5.8	hypothetical protein
	18609861	5.4	6.81	-2.66	0.0008	0.006	F39D8.3	hypothetical protein
	18593614	7.2	8.49	-2.45	0.0008	0.006	M04C3.1	hypothetical protein
	18535134	10.69	9.49	2.29	0.0008	0.006	perm-2	PERMeable eggshell
	18556277	6.44	7.57	-2.18	0.0008	0.006	T14A8.2	hypothetical protein
	18632007	7.26	8.8	-2.92	0.0008	0.006	pgp-6	P-GlycoProtein related
	18563794	7.37	8.41	-2.06	0.0008	0.0061	C25F9.14	hypothetical protein
	18487612	6.64	8.26	-3.08	0.0008	0.0061	rol-6	Cuticle collagen rol-6
	18457965	4.56	5.59	-2.05	0.0008	0.0061
	18595295	7.2	5.96	2.35	0.0008	0.0061	T05B11.4	hypothetical protein
	18621718	5.93	4.92	2.02	0.0008	0.0061	C44C1.6	hypothetical protein
	18590657	4.97	6.69	-3.28	0.0008	0.0061	F48G7.8	hypothetical protein
	18627946	5.07	6.56	-2.81	0.0009	0.0061	F59D12.2	hypothetical protein
	18549353	5.39	6.52	-2.18	0.0009	0.0062	tag-141	hypothetical protein
	18485357	8.35	6.36	3.97	0.0009	0.0062	F57C2.4	hypothetical protein
	18537967	5.53	6.58	-2.08	0.0009	0.0062	clec-170	C-type LECtin
	18606437	3.73	4.77	-2.06	0.0009	0.0062	ets-10	ETS class transcription factor
	18451787	5.54	4.47	2.09	0.0009	0.0062	C17E4.20	hypothetical protein
	18461055	5.81	4.62	2.28	0.0009	0.0063	Y106G6A.8	ncRNA
	18634767	5.16	6.28	-2.16	0.0009	0.0063
	18614858	8.05	9.41	-2.56	0.0009	0.0063	T01C8.10	ncRNA
	18491660	4.75	6.61	-3.63	0.0009	0.0063	hhat-1	Homolog of Hedgehog AcylTransferase
	18481376	8.45	10.57	-4.36	0.0009	0.0063	E01G4.6	hypothetical protein
	18532291	11.41	10.36	2.07	0.0009	0.0063	upp-1	Uridine PhosPhorylase
	18618252	7.66	5.14	5.71	0.0009	0.0063	ZK813.2	hypothetical protein
	18527200	3.57	4.63	-2.08	0.0009	0.0063	dao-6	Dauer or Aging adult Overexpression
	18520709	4.7	5.7	-2.01	0.0009	0.0063	C05B5.8	hypothetical protein
	18598952	5.42	7.39	-3.92	0.0009	0.0063	Y38A10A.2	hypothetical protein
	18630180	3.8	5.06	-2.39	0.0009	0.0064	R07A4.4	hypothetical protein
	18592476	3.85	5.44	-3	0.0009	0.0064	K02E11.11	hypothetical protein
	18524301	6.68	8.24	-2.95	0.0009	0.0065	F44E2.4	hypothetical protein
	18528819	5.99	4.59	2.65	0.0009	0.0066	Y22D7AR.10	hypothetical protein
	18635453	9.05	10.1	-2.06	0.0009	0.0066
	18536786	6.71	4.91	3.49	0.0009	0.0066
	18606503	7.07	8.19	-2.17	0.0009	0.0066	C52G5.2	hypothetical protein
	18622208	7.02	5.93	2.13	0.0009	0.0066	sul-3	SULfatase domain protein
	18545417	5.25	6.77	-2.87	0.001	0.0067	Y57G11B.2	hypothetical protein
	18608063	8.29	6.93	2.56	0.001	0.0067	pes-23	Patterned Expression Site
	18524346	4.13	5.39	-2.39	0.001	0.0067	bli-5	BLIstered cuticle
	18464966	6.19	7.33	-2.2	0.001	0.0068	col-61	COLlagen
	18553123	9.75	8.63	2.17	0.001	0.0069	F55B11.2	hypothetical protein
	18584927	6.86	5.21	3.16	0.001	0.0069	nas-9	Zinc metalloproteinase nas-9
	18590646	7.18	9.04	-3.61	0.001	0.0069	F48G7.5	hypothetical protein
	18556361	7.64	6.45	2.29	0.001	0.007	T19E7.6	hypothetical protein
	18631408	4.43	5.59	-2.24	0.001	0.007	slc-17.9	SLC (SoLute Carrier) homolog
	18618269	3.5	4.52	-2.03	0.001	0.007	ZK813.9	ncRNA
	18635015	3.5	4.52	-2.03	0.001	0.007
	18621535	5.83	4.78	2.07	0.001	0.007	C41G11.1	hypothetical protein
	18571348	7.01	5.29	3.31	0.001	0.007	fipr-13	FIP (Fungus-Induced Protein) Related
	18551861	7.4	9.17	-3.4	0.001	0.0071	acs-20	fatty Acid CoA Synthetase family
	18535394	5.06	7.35	-4.88	0.001	0.0071	mam-2	MAM (Meprin, A5-protein, PTPmu) domain protein
	18606886	4.44	5.85	-2.66	0.001	0.0071	nspc-19	Nematode Specific Peptide family, group C
	18589662	5.32	6.5	-2.27	0.001	0.0072	F38A6.4	hypothetical protein
	18620692	3.97	2.95	2.03	0.0011	0.0073	fkh-3	ForKHead transcription factor family
	18546507	6.13	4.24	3.72	0.0011	0.0074	Y73F8A.1161	ncRNA
	18616755	6.85	8.24	-2.62	0.0011	0.0074	lpr-5	LiPocalin-Related protein
	18495882	9.31	8.06	2.39	0.0011	0.0074	trr-1	Transcription-associated protein 1
	18487151	4.46	5.62	-2.25	0.0011	0.0074	cdh-7	CaDHerin family
	18567115	4.07	5.58	-2.85	0.0011	0.0074	cyp-35D1	CYtochrome P450 family
	18567087	5.73	3.75	3.95	0.0011	0.0074	F14F9.3	hypothetical protein
	18500592	6.17	5.01	2.24	0.0011	0.0075	bath-19	BTB and MATH domain containing
	18538164	4.36	5.73	-2.59	0.0011	0.0075	cutl-28	CUTiclin-Like
	18589579	7.11	8.46	-2.55	0.0011	0.0076	F36H9.5	hypothetical protein
	18452140	6.07	5.03	2.05	0.0011	0.0076	nhr-74	Nuclear Hormone Receptor family
	18523700	5.91	7.61	-3.24	0.0011	0.0076	F30H5.3	hypothetical protein
	18612750	6.08	7.2	-2.17	0.0011	0.0077	K02E10.4	hypothetical protein
	18614862	7.29	6.15	2.2	0.0011	0.0077	T01C8.2	hypothetical protein
	18543660	8.24	7.15	2.14	0.0012	0.0078	cyp-31A3	CYtochrome P450 family
	18608216	4.91	6	-2.13	0.0012	0.008	tre-4	Trehalase
	18462829	5.85	6.93	-2.11	0.0012	0.0081	Y65B4A.2	hypothetical protein
	18496819	6.03	4.97	2.08	0.0012	0.0081	F01D5.2	hypothetical protein
	18633316	8.07	5.77	4.91	0.0012	0.0081	Y62H9A.3	hypothetical protein
	18453480	6.44	5.35	2.13	0.0012	0.0082	D1007.8	hypothetical protein
	18479096	5.87	7.93	-4.15	0.0013	0.0083	col-79	Putative cuticle collagen 79
	18490186	4.01	5.27	-2.39	0.0013	0.0083	nhr-234	Nuclear Hormone Receptor family
	18565979	7.9	6.36	2.91	0.0013	0.0084	D1086.6	hypothetical protein
	18453942	6.27	7.66	-2.62	0.0013	0.0084	acox-2	Acyl-coenzyme A oxidase
	18522392	5.43	6.77	-2.53	0.0013	0.0084	elo-4	Putative fatty acid elongation protein 4
	18504737	8.03	9.37	-2.54	0.0013	0.0084	ptc-3	PaTChed family
	18615148	7.58	6.55	2.04	0.0013	0.0084	T04G9.7	hypothetical protein
	18555942	6.18	7.29	-2.16	0.0013	0.0085	T11B7.2	hypothetical protein
	18614398	7.03	8.06	-2.04	0.0013	0.0085	R07E4.3	hypothetical protein
	18561011	5.13	6.36	-2.34	0.0013	0.0085	ZK593.11	ncRNA
	18539435	4.74	5.82	-2.11	0.0013	0.0086	F58F9.3	hypothetical protein
	18492425	7.28	6.12	2.25	0.0013	0.0086	ZK669.3	GILT-like protein ZK669.3
	18468364	8.88	7.64	2.37	0.0013	0.0086	glc-2	Glutamate-gated chloride channel subunit beta
	18576427	10.13	8.14	3.96	0.0013	0.0087	del-6	DEgenerin Like
	18611252	9.68	10.73	-2.07	0.0013	0.0087	aagr-4	Acid Alpha Glucosidase Relate
	18503977	8.08	9.36	-2.44	0.0014	0.0088	T25D10.4	hypothetical protein
	18555780	8.13	7.13	2	0.0014	0.0089	spo-11	Meiotic recombination protein spo-11
	18615118	5.76	7.97	-4.63	0.0014	0.0091	nas-15	Zinc metalloproteinase nas-15
	18567443	3.62	4.98	-2.57	0.0014	0.0091	F18E3.12	hypothetical protein
	18618266	10.89	8.69	4.59	0.0014	0.0092	ZK813.7	hypothetical protein
	18599926	5.52	7.3	-3.42	0.0014	0.0092	grl-5	GRound-Like (grd related)
	18508300	8.95	7.73	2.32	0.0015	0.0093	tyr-1	Putative tyrosinase-like protein tyr-1
	18475388	7.45	8.64	-2.27	0.0015	0.0093	fpn-1.1	FerroPortiN
	18572151	2.84	4.52	-3.19	0.0015	0.0093	K01D12.8	hypothetical protein
	18589211	6.04	4.4	3.13	0.0015	0.0094	F35B12.3	hypothetical protein
	18623507	8.4	9.63	-2.35	0.0015	0.0094	F13D11.4	hypothetical protein
	18451611	7.26	8.48	-2.34	0.0015	0.0094	ugt-26	UDP-glucuronosyltransferase
	18494757	4.84	5.89	-2.07	0.0015	0.0094	C23H3.9	hypothetical protein
	18599488	5.44	7.11	-3.2	0.0015	0.0094	lact-8	beta-LACTamase domain containing
	18558802	5.92	4.66	2.38	0.0015	0.0095	Y54G2A.12	hypothetical protein
	18627658	5.01	6.48	-2.78	0.0015	0.0095	F56C3.9	hypothetical protein
	18535009	6.28	7.44	-2.24	0.0015	0.0096	C42D4.2	hypothetical protein
	18515634	5.53	6.59	-2.08	0.0015	0.0096	T20B12.11	ncRNA
	18495789	8.13	6.67	2.75	0.0015	0.0096	C44B7.5	hypothetical protein
	18469519	5.16	6.24	-2.11	0.0015	0.0097	F36H2.5	hypothetical protein
	18511034	6.13	5.09	2.05	0.0015	0.0097	F17C8.9	hypothetical protein
	18625525	4.74	5.79	-2.07	0.0015	0.0097	igcm-1	ImmunoGlobulin-like Cell adhesion Molecule family
	18453711	6.37	4.75	3.09	0.0015	0.0097	trt-1	Telomerase Reverse Transcriptase
	18608598	4.4	5.89	-2.79	0.0016	0.0101	F18E9.4	hypothetical protein
	18618255	9.16	6.6	5.9	0.0016	0.0101	ZK813.3	hypothetical protein
	18556612	8.44	6.87	2.97	0.0016	0.0101	T25B9.1	hypothetical protein
	18612629	8.53	10.08	-2.94	0.0017	0.0102	H42K12.3	hypothetical protein
	18619825	10.36	8.81	2.93	0.0017	0.0102	hsp-43	Heat Shock Protein
	18576248	6.32	7.37	-2.07	0.0017	0.0102	T20B3.1	hypothetical protein
	18508646	7.7	6.52	2.27	0.0017	0.0104	C06G4.1	KH domain-containing protein C06G4.1
	18479048	7.48	9.24	-3.37	0.0017	0.0104	mlt-10	hypothetical protein
	18514369	5.73	6.82	-2.12	0.0017	0.0104	R05D3.5	hypothetical protein
	18554415	4.35	6.28	-3.8	0.0017	0.0105	mam-3	MAM (Meprin, A5-protein, PTPmu) domain protein
	18569326	6.64	5.25	2.61	0.0017	0.0106	F36G9.3	hypothetical protein
	18604078	7.99	6.53	2.76	0.0017	0.0106	C16E9.1	hypothetical protein
	18599203	6.52	7.61	-2.14	0.0017	0.0106	asp-17	ASpartyl Protease
	18629895	4.18	5.52	-2.53	0.0017	0.0107	R03E9.2	hypothetical protein
	18630973	5.01	6.01	-2	0.0018	0.0107	zig-6	2 (Zwei) IG domain protein
	18493817	5.52	6.56	-2.05	0.0018	0.0109	C08E3.13	hypothetical protein
	18519193	8.14	6.77	2.58	0.0018	0.0109	ZC21.3	hypothetical protein
	18615941	5.89	7.44	-2.93	0.0018	0.0109	lpr-7	LiPocalin-Related protein
	18614621	6.88	8.39	-2.86	0.0018	0.0112	R11.2	hypothetical protein
	18477439	6.11	8.2	-4.25	0.0019	0.0113	ZK1025.3	hypothetical protein
	18621832	6.95	8.73	-3.45	0.0019	0.0114	ptr-4	PaTched Related family
	18549891	5.14	6.25	-2.15	0.0019	0.0116	C42D4.13	hypothetical protein
	18463510	5.26	6.27	-2.01	0.002	0.0117	grd-15	GRounDhog (hedgehog-like family)
	18500537	8.82	10.62	-3.48	0.002	0.0118	bli-2	BLIstered cuticle
	18523239	8.37	6.24	4.39	0.002	0.0121	col-8	Cuticle collagen 8
	18485341	9.56	10.93	-2.57	0.0021	0.0121	F56D3.1	hypothetical protein
	18587197	6.27	5.16	2.16	0.0021	0.0123	F14H3.12	hypothetical protein
	18476848	8.58	7.39	2.28	0.0021	0.0124	Y71F9B.13	hypothetical protein
	18617093	6.41	8.03	-3.07	0.0021	0.0124	Y34B4A.10	hypothetical protein
	18590572	4.85	5.88	-2.04	0.0021	0.0125	cutl-18	CUTiclin-Like
	18616248	7.82	9.51	-3.22	0.0021	0.0125	bus-8	hypothetical protein
	18562619	5.2	7.44	-4.72	0.0022	0.0127	irg-1	Infection Response Gene
	18546659	4.5	6.2	-3.25	0.0022	0.0127	pqn-91	Prion-like-(Q/N-rich)-domain-bearing protein
	18599334	5.12	6.27	-2.22	0.0022	0.0128	Y39H10A.4	hypothetical protein
	18508321	5.55	7.17	-3.07	0.0022	0.0129	acdh-6	Probable acyl-CoA dehydrogenase 6
	18582461	4.93	6.55	-3.06	0.0022	0.013	cyp-35A2	CYtochrome P450 family
	18574261	4.97	3.89	2.11	0.0022	0.013	pqn-60	Prion-like-(Q/N-rich)-domain-bearing protein
	18583272	5.4	7.04	-3.12	0.0023	0.013	C13C12.2	hypothetical protein
	18618550	4.43	5.55	-2.18	0.0023	0.0131	B0310.6	hypothetical protein
	18614267	6.09	7.75	-3.15	0.0023	0.0132	R07B1.13	hypothetical protein
	18617357	8.94	6.88	4.16	0.0023	0.0133	Y62H9A.6	hypothetical protein
	18632903	4.66	6.27	-3.04	0.0024	0.0135	hog-1	HOG only (Hedgehog Hog domain alone)
	18487907	6.48	8.03	-2.93	0.0024	0.0136	qua-1	QUAhog (hedgehog related)
	18602331	5.47	6.78	-2.49	0.0024	0.0139	mboa-1	O-acyltransferase
	18491120	5.24	6.79	-2.94	0.0024	0.0139	Y53F4B.25	hypothetical protein
	18576074	6.38	7.42	-2.06	0.0025	0.014	cyp-29A2	CYtochrome P450 family
	18605934	7.32	8.33	-2.01	0.0025	0.014	trpp-12	TRansport Protein Particle
	18471757	6.1	7.54	-2.71	0.0025	0.014	K10D3.4	hypothetical protein
	18597274	5.06	6.19	-2.18	0.0025	0.014	hpo-36	hypothetical protein
	18473518	7.43	8.82	-2.62	0.0025	0.0141	lron-9	eLRR (extracellular Leucine-Rich Repeat) ONly
	18484721	4.41	6.13	-3.28	0.0025	0.0142	F49E12.12	hypothetical protein
	18451457	6.21	7.23	-2.03	0.0025	0.0142	C09D4.1	Uncharacterized MFS-type transporter C09D4.1
	18633010	5.63	6.98	-2.56	0.0026	0.0144	Y102A11A.5	hypothetical protein
	18627064	5.69	7.18	-2.81	0.0026	0.0144	wrt-2	WaRThog (hedgehog-like family)
	18575566	3.29	4.36	-2.09	0.0026	0.0145	T09F5.1	hypothetical protein
	18452435	9.08	7.96	2.16	0.0026	0.0145	cdc-7	Cell Division Cycle related
	18503598	6.77	8.06	-2.45	0.0027	0.015	cutl-15	CUTiclin-Like
	18557127	5.01	6.55	-2.91	0.0027	0.015	W09G12.10	hypothetical protein
	18490494	5.55	6.7	-2.22	0.0027	0.0151	Y46G5A.29	hypothetical protein
	18633322	10.28	8.4	3.67	0.0027	0.0151	Y62H9A.5	hypothetical protein
	18588166	8.99	7.67	2.5	0.0027	0.0152	F22F7.8	hypothetical protein
	18586350	5.25	6.52	-2.42	0.0028	0.0154	fut-2	FUcosyl Transferase
	18600889	6.57	7.84	-2.42	0.0028	0.0155	Y73C8B.1	hypothetical protein
	18617353	9.48	7.52	3.9	0.0028	0.0155	Y62H9A.4	hypothetical protein
	18464106	3.84	4.89	-2.08	0.0029	0.0161	cutl-8	CUTiclin-Like
	18467493	5.62	6.69	-2.1	0.0029	0.0162	F08A8.8	hypothetical protein
	18574818	6.59	5.44	2.22	0.003	0.0162	T04C12.7	hypothetical protein
	18598426	5.17	6.57	-2.65	0.003	0.0165	Y113G7B.12	hypothetical protein
	18573619	6	7.36	-2.58	0.0032	0.017	M03F8.1	hypothetical protein
	18483202	8.67	10.09	-2.69	0.0032	0.0173	pqn-32	Prion-like-(Q/N-rich)-domain-bearing protein
	18599946	3.83	5.76	-3.8	0.0032	0.0174	Y47D7A.9	hypothetical protein
	18538726	8.68	9.71	-2.05	0.0033	0.0175	noah-2	NOmpA Homolog (Drosophila nompA: no mechanoreceptor potential A)
	18565856	3	5	-4.02	0.0033	0.0176	D1014.6	hypothetical protein
	18565877	11.31	9.65	3.16	0.0033	0.0177	D1054.11	hypothetical protein
	18503640	4.3	5.43	-2.18	0.0033	0.0177	srh-70	Serpentine Receptor, class H
	18547648	4.06	5.08	-2.03	0.0034	0.0181	nas-6	Metalloendopeptidase
	18630409	5.68	7.1	-2.66	0.0035	0.0183	col-182	COLlagen
	18598742	3.7	4.84	-2.19	0.0036	0.0187	lys-3	LYSozyme
	18480429	5.46	6.52	-2.08	0.0036	0.0188	C38C6.3	hypothetical protein
	18535055	3.88	5.52	-3.11	0.0037	0.0191	C43F9.11	hypothetical protein
	18488490	5.66	6.67	-2.01	0.0037	0.0193	T13C2.3	hypothetical protein
	18492500	7.09	5.91	2.26	0.0037	0.0194	rev-1	DNA repair protein REV1
	18552080	7.62	8.97	-2.55	0.0038	0.0195	F33D4.6	hypothetical protein
	18540157	9.66	8.59	2.11	0.0038	0.0195	gon-4	hypothetical protein
	18478399	6.21	7.48	-2.41	0.0038	0.0195	madf-5	MADF domain transcription factor
	18532764	8.19	9.31	-2.16	0.0039	0.0198	C01B10.11	hypothetical protein
	18615369	8.32	6.64	3.2	0.004	0.0204	ttr-59	TransThyretin-Related family domain
	18593930	3.35	4.38	-2.04	0.004	0.0206	R04F11.22	ncRNA
	18600183	6.1	5.06	2.05	0.004	0.0206	Y51A2D.26	ncRNA
	18568612	6.17	7.28	-2.15	0.0041	0.0208	acs-2	fatty Acid CoA Synthetase family
	18529368	10.5	9.06	2.7	0.0041	0.0208	col-96	COLlagen
	18471723	6.85	5.7	2.22	0.0041	0.0209	K09H9.8	hypothetical protein
	18634207	4.62	5.79	-2.25	0.0043	0.0216	bus-17	hypothetical protein
	18517546	5.13	6.34	-2.32	0.0044	0.0218	Y47D3B.1	hypothetical protein
	18459348	8.09	7.07	2.03	0.0044	0.0221	T10E9.2	hypothetical protein
	18589802	6.36	7.5	-2.2	0.0045	0.0225	F40F9.5	hypothetical protein
	18619451	4.85	6.35	-2.83	0.0046	0.0226	C09B8.4	hypothetical protein
	18483156	5.69	7.1	-2.66	0.0046	0.0226	F28C6.5	hypothetical protein
	18586100	10.94	9.34	3.05	0.0046	0.0226	D1054.10	hypothetical protein
	18533665	6.9	8.51	-3.06	0.0046	0.0227	C10C5.4	Aminoacylase-1
	18466036	6.72	5.7	2.02	0.0046	0.0229	cyp-36A1	Probable cytochrome P450 CYP36A1
	18452525	6.8	5.68	2.17	0.0046	0.0229	C36B1.14	hypothetical protein
	18567732	8.97	6.95	4.06	0.0047	0.023	pqn-31	Prion-like-(Q/N-rich)-domain-bearing protein
	18520167	3.61	5	-2.61	0.0047	0.0232	B0280.7	hypothetical protein
	18576462	6.1	7.64	-2.91	0.0049	0.0238	ptr-16	PaTched Related family
	18518889	5.67	7.18	-2.85	0.0049	0.024	Y75B8A.28	hypothetical protein
	18564293	8.27	5.5	6.81	0.0051	0.0245	C33G8.2	hypothetical protein
	18620774	6.07	7.47	-2.65	0.0051	0.0246	C30G4.4	hypothetical protein
	18536679	5.53	7.53	-3.98	0.0051	0.0248	F13E9.13	hypothetical protein
	18635551	3.71	5.12	-2.66	0.0052	0.0248
	18567960	10.9	9.4	2.83	0.0052	0.0248	fipr-2	FIP (Fungus-Induced Protein) Related
	18516733	9.09	7.41	3.21	0.0052	0.0249	Y37D8A.19	hypothetical protein
	18606126	11.2	9.21	3.96	0.0052	0.0251	C45B2.1	hypothetical protein
	18616392	7.73	6.46	2.41	0.0053	0.0254	T25B2.2	hypothetical protein
	18603219	4.98	6.05	-2.09	0.0053	0.0254	C06G1.2	hypothetical protein
	18499691	4.43	6.04	-3.06	0.0054	0.0258	oac-30	O-ACyltransferase homolog
	18606588	5.62	6.68	-2.09	0.0054	0.0258	C53C11.5	hypothetical protein
	18581646	6.88	5.54	2.53	0.0057	0.0267	col-149	COLlagen
	18559040	6.48	7.84	-2.58	0.0057	0.0269	Y55F3AM.14	hypothetical protein
	18633612	9.97	7.86	4.33	0.0058	0.0271	ZC373.2	hypothetical protein
	18608586	8.61	7.43	2.27	0.0058	0.0271	F18E9.3	hypothetical protein
	18494921	5.02	6.21	-2.28	0.0058	0.0273	C27A2.12	hypothetical protein
	18556483	4.45	5.62	-2.25	0.0058	0.0274	dpy-20	Protein dumpy-20
	18629330	8.11	5.94	4.49	0.0059	0.0275	K10C2.8	hypothetical protein
	18586146	5.45	6.51	-2.08	0.006	0.028	D1054.9	hypothetical protein
	18588239	10	8.2	3.48	0.006	0.0281	fipr-1	FIP (Fungus-Induced Protein) Related
	18490327	3.44	4.64	-2.29	0.0061	0.0283	Y39G8C.11	ncRNA
	18626647	4.6	5.66	-2.09	0.0062	0.0286	npax-2	N-terminal PAX (PAI domain only) protein
	18471508	7.97	5.81	4.48	0.0063	0.029	K07A1.6	hypothetical protein
	18582068	4.55	5.62	-2.09	0.0064	0.0294	clec-225	C-type LECtin
	18525560	4.31	5.48	-2.25	0.0065	0.0298	K04C2.5	hypothetical protein
	18528369	7.47	6.41	2.08	0.0065	0.0299	polq-1	DNA polymerase theta
	18489190	5.39	6.39	-2	0.0066	0.03	T26C5.2	hypothetical protein
	18527989	3.08	4.09	-2.01	0.0066	0.0302	T21D11.1	hypothetical protein
	18594254	4.08	5.25	-2.26	0.0066	0.0303	R09A1.3	hypothetical protein
	18468529	7.83	6.73	2.15	0.0069	0.0314	drsh-1	Ribonuclease 3
	18603383	7.46	6.2	2.39	0.0069	0.0314	C08A9.10	hypothetical protein
	18479108	7.96	9.22	-2.4	0.007	0.0317	bli-1	Cuticle collagen bli-1
	18609327	5.26	6.58	-2.49	0.0071	0.0321	daf-6	hypothetical protein
	18623059	7.69	8.96	-2.41	0.0072	0.0322	mlt-9	hypothetical protein
	18625148	7.9	9.18	-2.43	0.0073	0.0326	F35B3.4	hypothetical protein
	18559568	4.85	6.05	-2.3	0.0074	0.0332	Y62E10A.19	hypothetical protein
	18456706	6.4	7.52	-2.18	0.0075	0.0335	F55D12.2	hypothetical protein
	18484071	5.08	6.11	-2.04	0.0075	0.0335	F42G2.2	hypothetical protein
	18595822	3.4	4.81	-2.65	0.0075	0.0335	T08G5.3	hypothetical protein
	18562911	7.31	5.81	2.83	0.0077	0.0341	fipr-7	FIP (Fungus-Induced Protein) Related
	18570274	5.28	6.86	-2.99	0.0078	0.0344	grd-2	GRounDhog (hedgehog-like family)
	18595729	4.1	5.21	-2.16	0.0079	0.0349	ptr-15	PaTched Related family
	18463737	6.4	7.69	-2.44	0.008	0.0352	ZC123.1	hypothetical protein
	18504672	6.17	4.84	2.5	0.0081	0.0357	W10G11.3	hypothetical protein
	18488896	7.59	6.33	2.4	0.0083	0.0362	T23B7.3	hypothetical protein
	18477357	4.2	5.35	-2.22	0.0084	0.0368	ZC434.10; ZC434.3	hypothetical protein
	18635689	7.69	6.63	2.09	0.0086	0.0373
	18608979	4.9	6	-2.15	0.0087	0.0376	F22F4.1	hypothetical protein
	18463342	3.15	4.84	-3.22	0.009	0.0385	Y71G12B.18	hypothetical protein
	18456997	4.98	6.12	-2.2	0.009	0.0386	che-14	hypothetical protein
	18601214	9.65	8.18	2.77	0.009	0.0387	pqn-94	Prion-like-(Q/N-rich)-domain-bearing protein
	18535480	7.07	8.25	-2.27	0.0092	0.0394	C49A9.2	hypothetical protein
	18479104	12.14	10.86	2.42	0.0093	0.0396	col-80	Putative cuticle collagen 80
	18592869	6.64	7.64	-2	0.0093	0.0397	K07C11.8	hypothetical protein
	18540457	12.07	11.03	2.05	0.0094	0.04	K08D12.6	hypothetical protein
	18565334	7.82	6.03	3.46	0.0095	0.0402	fipr-10	FIP (Fungus-Induced Protein) Related
	18580941	3.78	5.61	-3.54	0.0096	0.0406	ZC513.2	hypothetical protein
	18463981	4.05	5.13	-2.11	0.0097	0.0408	bah-1	Biofilm Absent on Head (after Yersinia exposure)
	18467543	9.69	8.62	2.1	0.0097	0.0408	F10D11.2	hypothetical protein
	18539609	5.45	6.53	-2.11	0.0097	0.0409	glf-1	GaLactoFuranose synthesis (UGM, UDP-galactopyranose mutase)
	18586361	3.85	5.13	-2.42	0.01	0.0418	EGAP9.3	hypothetical protein
	18635153	5.38	4.3	2.12	0.01	0.0418
	18566300	4.19	5.22	-2.04	0.0102	0.0426	ptd-2	disPaTcheD family
	18593053	5.13	6.36	-2.35	0.0103	0.0431	K09C6.8	hypothetical protein
	18557552	5.11	6.53	-2.68	0.0104	0.0433	Y11D7A.9	hypothetical protein
	18537691	5.45	6.6	-2.22	0.0106	0.0438	F35H10.14	ncRNA
	18552719	6.95	5.53	2.68	0.011	0.045	F45E4.5	hypothetical protein
	18546192	5.71	6.79	-2.11	0.0111	0.0454
	18532781	4.06	5.73	-3.18	0.0111	0.0456	C01B10.47	ncRNA
	18478970	8.09	7.06	2.05	0.0112	0.0457	C08H9.15	hypothetical protein
	18633588	4.81	5.96	-2.22	0.0115	0.0468	mam-1	MAM (Meprin, A5-protein, PTPmu) domain protein
	18615090	11.97	10.59	2.6	0.0116	0.0471	T04F8.8	hypothetical protein
	18614407	6.09	7.2	-2.15	0.0119	0.048	grd-1	GRounDhog (hedgehog-like family)
	18614358	6.04	7.12	-2.11	0.0122	0.0489	R07E3.6	hypothetical protein
	18612347	6.63	7.68	-2.08	0.0123	0.0493	H03E18.1	hypothetical protein
	18600666	4.13	5.56	-2.68	0.0123	0.0493	clec-242	C-type LECtin
