# Supplementary material for: Transcriptomic Analysis Reveals JAK2/MPL-Independent Effects of Calreticulin Mutations in a C. elegans Model
Source: Cells. 2023 Jan 2;12(1):186. doi: 10.3390/cells12010186 (PMC9818371; doi:10.3390/cells12010186)
Supplement: Supplementary file 1 [file cells-12-00186-s001.zip › Table S4.xlsx]

## Sheet: Hoja1
	Table S4. Results of microarray analysis when comparing CRT-1(mut2) vs WT
	ID	CRT-1(mut2) Avg (log2)	WT Avg (log2)	Fold Change	P-val	FDR P-val	Gene Symbol	Description
	18587327	3.58	6.94	-10.22	3.82e-11	1.08e-06	pud-3	Protein Up-regulated in Daf-2(gf)
	18556853	9	11.54	-5.81	1.27e-10	1.47e-06	pqn-74	Prion-like-(Q/N-rich)-domain-bearing protein
	18575180	4.21	6.52	-4.97	1.55e-10	1.47e-06	T06E4.14	hypothetical protein
	18488051	6.32	8.75	-5.39	2.59e-10	1.84e-06	T06D8.3	hypothetical protein
	18594507	6.32	9.88	-11.75	4.32e-10	2.45e-06	R12A1.3	hypothetical protein
	18557521	8.21	11.81	-12.07	7.2e-10	2.79e-06	col-120	COLlagen
	18476090	7.51	10.65	-8.87	9.77e-10	2.79e-06	Y48G8AL.16	hypothetical protein
	18481652	5.75	9	-9.47	6.01e-10	2.79e-06	F07H5.8	hypothetical protein
	18566617	5.59	8.12	-5.78	9.82e-10	2.79e-06	cpt-5	Carnitine Palmitoyl Transferase
	18574918	9.59	6.14	10.92	8.85e-10	2.79e-06	tbb-6	TuBulin, Beta
	18489178	4.26	6.66	-5.25	1.4e-09	3.31e-06	T25E4.1	hypothetical protein
	18575177	7.06	10.27	-9.27	1.33e-09	3.31e-06	pqn-63	Prion-like-(Q/N-rich)-domain-bearing protein
	18573737	7.83	11.14	-9.93	1.56e-09	3.4e-06	R02F11.1	hypothetical protein
	18601602	6.18	9.27	-8.49	1.8e-09	3.64e-06	ugt-6	UDP-glucuronosyltransferase
	18589752	5.93	9.07	-8.81	2.12e-09	3.79e-06	grl-27	GRound-Like (grd related)
	18480145	8.02	10.88	-7.25	2.14e-09	3.79e-06	C30G12.2	hypothetical protein
	18501709	6.68	9.56	-7.39	2.35e-09	3.92e-06	R03C1.1	hypothetical protein
	18632549	8.22	5.89	5.05	3.84e-09	4.78e-06	ceh-39	Homeobox protein ceh-39
	18543279	7.05	9.36	-4.98	3.67e-09	4.78e-06	pqn-76; abu-5; pqn-78	Prion-like-(Q/N-rich)-domain-bearing protein; Activated in Blocked Unfolded protein response
	18622280	4.47	7.6	-8.78	3.35e-09	4.78e-06	lgx-1	Lin-12 and Glp-1 X-hybridizing
	18478611	9.25	11.95	-6.49	3.59e-09	4.78e-06	pho-11	Putative acid phosphatase 11
	18492437	7.11	5.16	3.87	3.88e-09	4.78e-06	ZK673.1	hypothetical protein
	18499587	9.11	7.02	4.24	3.81e-09	4.78e-06	F46C5.1	hypothetical protein
	18589254	7.94	10.55	-6.12	4.12e-09	4.87e-06	F35E12.5	hypothetical protein
	18611717	7.74	4.99	6.75	4.72e-09	5.29e-06	mes-1	Maternal Effect Sterile
	18545113	6.16	8.36	-4.58	4.85e-09	5.29e-06	Y54G2A.45	hypothetical protein
	18567233	4.85	8.12	-9.65	5.34e-09	5.61e-06	pud-4	Protein Up-regulated in Daf-2(gf)
	18458679	3.5	6.67	-8.99	5.88e-09	5.7e-06	R12E2.14	hypothetical protein
	18568239	6.7	9.2	-5.62	5.92e-09	5.7e-06	asns-1	Asparagine synthetase
	18574047	7.61	10.3	-6.48	6.02e-09	5.7e-06	pqn-54	Prion-like-(Q/N-rich)-domain-bearing protein
	18550679	6.69	9.62	-7.61	6.23e-09	5.7e-06	D2096.6	hypothetical protein
	18490455	6.32	8.39	-4.17	7.2e-09	6.39e-06	spds-1	SPermiDine Synthase
	18627561	6.22	8.66	-5.43	8.2e-09	7.05e-06	drd-5	dietary restriction down regulated
	18454469	7.6	10.32	-6.61	8.62e-09	7.19e-06	col-60	COLlagen
	18468865	5.92	7.76	-3.57	8.93e-09	7.24e-06	F30F8.5	hypothetical protein
	18596111	9.53	11.12	-3.01	1.11e-08	7.86e-06	pmp-5	Peroxisomal Membrane Protein related
	18486262	8.4	11.4	-8.02	1.06e-08	7.86e-06	sdz-24	SKN-1 Dependent Zygotic transcript
	18582873	6.72	4.52	4.62	1.04e-08	7.86e-06	C06H2.7	hypothetical protein
	18506823	8.36	11.03	-6.36	9.99e-09	7.86e-06	abu-14	Activated in Blocked Unfolded protein response
	18553423	9.03	11.95	-7.55	1.09e-08	7.86e-06	col-104	COLlagen
	18601975	6.03	8.31	-4.87	1.16e-08	8.06e-06	lron-2	eLRR (extracellular Leucine-Rich Repeat) ONly
	18478908	6.19	8.24	-4.14	1.25e-08	8.34e-06	C08E3.1	hypothetical protein
	18591546	5.94	10.11	-17.93	1.26e-08	8.34e-06	col-156	COLlagen
	18568457	6.69	4.71	3.93	1.36e-08	8.71e-06	F26G5.1	hypothetical protein
	18476583	8.83	11.88	-8.27	1.38e-08	8.71e-06	grl-16	GRound-Like (grd related)
	18543282	5.64	7.84	-4.57	1.43e-08	8.74e-06
	18606667	6.38	8.78	-5.3	1.45e-08	8.74e-06	C54D2.1	hypothetical protein
	18533847	8.93	10.55	-3.07	1.62e-08	9.61e-06	C17H12.8	hypothetical protein
	18536954	6	7.56	-2.95	1.74e-08	9.95e-06	F20B10.3	hypothetical protein
	18560836	9.01	11.92	-7.52	1.75e-08	9.95e-06	ZK180.5	hypothetical protein
	18625111	4.82	6.8	-3.94	1.84e-08	1.01e-05	F35A5.4	hypothetical protein
	18472371	8.94	11.32	-5.18	2.05e-08	1.01e-05	R12E2.7	hypothetical protein
	18618113	5.98	8.16	-4.52	2.2e-08	1.01e-05	ZK662.2	hypothetical protein
	18587972	5.9	8.13	-4.7	2.2e-08	1.01e-05	F21C10.9	hypothetical protein
	18592451	4.49	6.7	-4.63	1.87e-08	1.01e-05	K01D12.9	hypothetical protein
	18494685	4.9	7.23	-5	1.96e-08	1.01e-05	C18E9.7	hypothetical protein
	18578973	5.14	7.15	-4.03	2.13e-08	1.01e-05	Y43F8B.3	hypothetical protein
	18507015	7.68	10.38	-6.5	2.05e-08	1.01e-05	ZK1307.1	hypothetical protein
	18623082	8.61	10.27	-3.15	2.09e-08	1.01e-05	F09B12.3	Putative phospholipase B-like 2
	18511895	6.22	7.78	-2.94	2.01e-08	1.01e-05	F42A10.9	hypothetical protein
	18496792	8.65	10.48	-3.56	2.18e-08	1.01e-05	pho-1	intestinal acid PHOsphatase
	18490903	8.1	10.81	-6.56	2.15e-08	1.01e-05	Y51H7C.1	hypothetical protein
	18459361	8.26	10.99	-6.62	2.4e-08	1.05e-05	T10E9.3	hypothetical protein
	18615564	6.07	8.7	-6.19	2.38e-08	1.05e-05	col-170	COLlagen
	18613758	6.78	9.67	-7.41	2.41e-08	1.05e-05	M153.1	hypothetical protein
	18497340	9.13	11.85	-6.57	2.49e-08	1.07e-05	col-73	COLlagen
	18505906	9.19	11.98	-6.91	2.56e-08	1.09e-05	Y51H7C.13	hypothetical protein
	18595579	5.31	7.73	-5.35	2.73e-08	1.09e-05	T06E4.12	hypothetical protein
	18507925	10.23	8.27	3.91	2.76e-08	1.09e-05	ckb-2	Choline kinase B2
	18476075	10.46	12.45	-3.97	2.73e-08	1.09e-05	Y48G8AL.12	hypothetical protein
	18579916	6.87	8.68	-3.52	2.64e-08	1.09e-05	abu-4	Activated in Blocked Unfolded protein response
	18575832	8.42	11.68	-9.61	2.75e-08	1.09e-05	col-157	COLlagen
	18618819	7.14	5.38	3.38	3.56e-08	1.39e-05	tag-52	Putative protein tag-52
	18561415	6.58	8.74	-4.47	3.64e-08	1.39e-05	pqn-2	Prion-like-(Q/N-rich)-domain-bearing protein
	18623658	6.41	7.8	-2.62	3.68e-08	1.39e-05	otpl-3	OToPetrin-Like
	18547893	6.94	9.08	-4.38	3.79e-08	1.42e-05	clec-52	C-type LECtin
	18495737	7.37	8.64	-2.41	4.01e-08	1.48e-05	C44B7.11	Putative endoplasmic reticulum metallopeptidase 1-B
	18486634	5.69	8.17	-5.57	4.31e-08	1.57e-05	M02G9.2	hypothetical protein
	18580845	6.49	4.17	4.99	4.59e-08	1.65e-05	ugt-18	UDP-glucuronosyltransferase
	18502392	8.24	10.56	-4.98	4.66e-08	1.65e-05	abu-11	Activated in Blocked Unfolded protein response
	18517626	5.62	8.46	-7.15	4.93e-08	1.71e-05	Y47D3B.6	hypothetical protein
	18483470	7.2	8.77	-2.97	4.89e-08	1.71e-05	F35C11.4	hypothetical protein
	18487953	7.11	5.67	2.7	5.15e-08	1.73e-05	T05H10.4	hypothetical protein
	18613159	6.67	5.01	3.16	5.36e-08	1.73e-05	K08H2.3	hypothetical protein
	18499262	8.45	10.86	-5.33	5.32e-08	1.73e-05	msra-1	Methionine Sulfoxide Reductase A
	18589884	6.08	8.02	-3.83	5.29e-08	1.73e-05	F41E6.11	hypothetical protein
	18467409	8.93	7.48	2.73	5.21e-08	1.73e-05	inx-14	Innexin-14
	18587550	5.67	6.94	-2.4	5.19e-08	1.73e-05	F17C11.12	hypothetical protein
	18478644	5.57	4.33	2.37	6.18e-08	1.77e-05	C05D12.2	hypothetical protein
	18543570	6.74	3.95	6.94	6.49e-08	1.77e-05	flh-3	FLYWCH zinc finger transcription factor homolog
	18586880	7.96	11.22	-9.56	5.66e-08	1.77e-05	fat-7	Delta(9)-fatty-acid desaturase fat-7
	18635583	7.69	5.76	3.79	6.1e-08	1.77e-05
	18453349	10.9	12.42	-2.88	6.28e-08	1.77e-05	acdh-1	Acyl CoA DeHydrogenase
	18534521	6.81	10.03	-9.33	6.04e-08	1.77e-05	C30H6.5	hypothetical protein
	18589942	7.17	10.11	-7.69	5.85e-08	1.77e-05	F41F3.3	hypothetical protein
	18546366	8.1	10.45	-5.07	5.71e-08	1.77e-05	bli-6	BLIstered cuticle
	18581627	6.18	8.53	-5.09	6.13e-08	1.77e-05	abu-1	Activated in Blocked Unfolded protein response
	18531521	5.99	9.5	-11.43	6.2e-08	1.77e-05	col-97	COLlagen
	18555112	9.75	8.58	2.24	6.44e-08	1.77e-05	wapl-1	WAPL (Drosophila Wings APart-Like cohesin interactor)
	18466497	7.55	8.99	-2.71	6.35e-08	1.77e-05	fhod-1	Formin HOmology Domain
	18602239	8.59	9.96	-2.6	5.76e-08	1.77e-05	B0272.3	Probable 3-hydroxyacyl-CoA dehydrogenase B0272.3
	18629588	5.19	7.35	-4.47	6.39e-08	1.77e-05	M153.2	hypothetical protein
	18607679	7.33	8.69	-2.57	5.66e-08	1.77e-05	F11C1.5	hypothetical protein
	18491360	9.86	12.65	-6.93	6.15e-08	1.77e-05	rol-1	ROLler: helically twisted, animals roll when moving
	18539225	7.07	8.61	-2.91	6.57e-08	1.78e-05	clec-67	C-type LECtin
	18453693	4.88	7.7	-7.09	6.73e-08	1.8e-05	D2092.8	hypothetical protein
	18616430	9.48	10.8	-2.5	6.84e-08	1.81e-05	nep-22	NEPrilysin metallopeptidase family
	18484302	9.45	11.14	-3.22	6.99e-08	1.84e-05	tba-4	TuBulin, Alpha
	18497465	8.01	11.15	-8.81	7.05e-08	1.84e-05	F13H8.5	hypothetical protein
	18492914	7.74	6.51	2.34	7.27e-08	1.86e-05	B0304.4	hypothetical protein
	18481901	8.3	6.9	2.63	7.27e-08	1.86e-05	pch-2	Putative pachytene checkpoint protein 2
	18595432	6.77	4.42	5.12	7.7e-08	1.94e-05	pzf-1	Paired Zinc Finger protein
	18558393	10.21	12.81	-6.07	7.71e-08	1.94e-05	dpy-4	DumPY: shorter than wild-type
	18540357	5.65	3.8	3.6	7.82e-08	1.95e-05	fmo-2	Dimethylaniline monooxygenase [N-oxide-forming]
	18635443	10.2	8.78	2.67	8.01e-08	1.96e-05
	18560527	5.53	7.74	-4.63	8.09e-08	1.96e-05	Y94H6A.10	hypothetical protein
	18537191	7.62	9	-2.59	8.05e-08	1.96e-05	atgp-1	Amino acid Transporter GlycoProtein subunit
	18621635	8.22	9.52	-2.46	8.59e-08	2.04e-05	ifp-1	Intermediate filament protein ifp-1
	18620658	7.2	8.45	-2.37	8.7e-08	2.04e-05	C28G1.5	hypothetical protein
	18623937	6.59	8.26	-3.18	8.54e-08	2.04e-05	F16F9.4	hypothetical protein
	18629461	8.39	10.25	-3.63	8.75e-08	2.04e-05	asns-2	ASparagiNe Synthetase
	18606946	4.91	7.27	-5.14	8.62e-08	2.04e-05	E01G6.1	hypothetical protein
	18614535	6.47	4.91	2.96	8.83e-08	2.04e-05	R09A8.2	hypothetical protein
	18454463	9.98	8.75	2.35	8.99e-08	2.06e-05	F21F3.7	hypothetical protein
	18560391	3.26	5.78	-5.71	9.22e-08	2.08e-05	pqn-90	Prion-like-(Q/N-rich)-domain-bearing protein
	18629301	10.54	11.89	-2.54	9.2e-08	2.08e-05	asp-14	ASpartyl Protease
	18537444	8.33	10.99	-6.33	9.36e-08	2.09e-05	dpy-13	Cuticle collagen dpy-13
	18588389	5.07	6.49	-2.67	9.52e-08	2.11e-05	slc-17.8	SLC (SoLute Carrier) homolog
	18620962	7.89	10.31	-5.38	9.99e-08	2.15e-05	lgc-21	Ligand-Gated ion Channel
	18584428	5.91	8.42	-5.7	9.91e-08	2.15e-05	ech-1.1	Enoyl-CoA Hydratase
	18484797	6.25	5.05	2.3	9.94e-08	2.15e-05	F52H3.4	hypothetical protein
	18628851	7.99	10.42	-5.39	9.89e-08	2.15e-05	dao-3	Dauer or Aging adult Overexpression
	18513150	9.34	8.14	2.3	1.02e-07	2.19e-05	H14A12.3	Protein rogdi homolog
	18533086	11.18	10.05	2.18	1.07e-07	2.28e-05	lip-1	Lateral-signal-Induced Phosphatase
	18548568	5.71	7.06	-2.55	1.09e-07	2.28e-05	C08F11.13	hypothetical protein
	18506135	7.68	8.88	-2.29	1.09e-07	2.28e-05	gst-26	Glutathione S-Transferase
	18615401	6.83	4.74	4.24	1.11e-07	2.29e-05	lsd-1	Lysine-Specific histone Demethylase homolog
	18492525	9.09	11.8	-6.56	1.22e-07	2.52e-05	ZK84.1	hypothetical protein
	18606355	6.81	4.27	5.82	1.26e-07	2.57e-05	C49F5.6	hypothetical protein
	18550966	8.21	10.82	-6.11	1.27e-07	2.57e-05	col-130	COLlagen
	18558023	7.96	10.9	-7.63	1.29e-07	2.58e-05	col-109	COLlagen
	18610178	10.37	11.41	-2.05	1.28e-07	2.58e-05	tatn-1	Tyrosine AminoTraNsferase
	18586012	9.88	11.47	-3.01	1.36e-07	2.66e-05	ttr-44	TransThyretin-Related family domain
	18519200	4.48	6.62	-4.43	1.36e-07	2.66e-05	ZC21.3	hypothetical protein
	18571247	5.9	7.89	-3.98	1.34e-07	2.66e-05	F56A4.3	hypothetical protein
	18569727	9.21	10.67	-2.74	1.39e-07	2.69e-05	aqp-4	AQuaPorin or aquaglyceroporin related
	18593243	7.94	9.85	-3.75	1.42e-07	2.74e-05	odc-1	Ornithine decarboxylase
	18550457	8.65	11.62	-7.83	1.43e-07	2.74e-05	col-138	COLlagen
	18633021	5.34	7.06	-3.31	1.48e-07	2.78e-05	Y102A11A.7	hypothetical protein
	18603195	7.65	9.89	-4.7	1.47e-07	2.78e-05	C06G1.1	hypothetical protein
	18498023	8.67	7.25	2.68	1.48e-07	2.78e-05	F22D3.5	hypothetical protein
	18506684	6.81	8.41	-3.02	1.55e-07	2.88e-05	ZC204.12	hypothetical protein
	18478891	10.87	9.72	2.23	1.55e-07	2.88e-05	zyg-11	Early embryogenesis protein zyg-11
	18606732	6.95	5.63	2.51	1.59e-07	2.91e-05	C55B6.1	hypothetical protein
	18566718	8.74	10.74	-4.02	1.59e-07	2.91e-05	F10A3.4	hypothetical protein
	18562051	7.49	9.76	-4.81	1.62e-07	2.95e-05	C02E7.6	hypothetical protein
	18539011	8.59	7.51	2.11	1.63e-07	2.95e-05	F55G1.6	hypothetical protein
	18630323	7.13	6.11	2.02	1.8e-07	3e-05	R07E4.5	hypothetical protein
	18502360	4.7	6.52	-3.52	1.69e-07	3e-05	T01B7.8	hypothetical protein
	18491386	7.47	6.35	2.17	1.73e-07	3e-05	sinh-1	Stress-activated map kinase-interacting protein 1 homolog
	18611572	6	7.24	-2.36	1.7e-07	3e-05	F53H8.3	hypothetical protein
	18481512	7.21	5.38	3.55	1.76e-07	3e-05	EEED8.3	hypothetical protein
	18585678	6.99	5.83	2.23	1.71e-07	3e-05	C53A5.16	hypothetical protein
	18485924	9.31	7.67	3.12	1.77e-07	3e-05	tdc-1	Tyrosine decarboxylase
	18493867	7.22	8.5	-2.42	1.8e-07	3e-05	math-4	MATH (meprin-associated Traf homology) domain containing
	18503713	4.59	7.64	-8.25	1.75e-07	3e-05	nas-27	Zinc metalloproteinase nas-27
	18584870	9.16	7.39	3.4	1.8e-07	3e-05	C37C3.9	hypothetical protein
	18505159	9.13	10.62	-2.81	1.76e-07	3e-05	Y38F1A.6	Probable hydroxyacid-oxoacid transhydrogenase, mitochondrial
	18534984	9.22	8	2.33	1.75e-07	3e-05	C42C1.8	hypothetical protein
	18540563	9.74	8.6	2.2	1.73e-07	3e-05	K08F4.3	Translocon-associated protein subunit beta
	18564092	9.02	10.27	-2.38	1.85e-07	3.07e-05	C29F3.7	hypothetical protein
	18621016	4.4	7.06	-6.32	1.88e-07	3.1e-05	C34E11.2	hypothetical protein
	18564014	9.16	8.1	2.09	1.91e-07	3.12e-05	lig-1	DNA ligase 1
	18533414	8.91	10.25	-2.53	1.91e-07	3.12e-05	ugt-22	UDP-glucuronosyltransferase
	18540716	8.65	10.64	-3.98	1.95e-07	3.15e-05	trx-3	ThioRedoXin [see also xtr]
	18459640	10.67	9.66	2	1.95e-07	3.15e-05	lst-1	Lateral Signaling Target
	18467576	8.87	11.32	-5.46	1.98e-07	3.17e-05	F10D11.6	hypothetical protein
	18475690	8.18	10.75	-5.91	1.99e-07	3.17e-05	Y47G6A.15	hypothetical protein
	18481211	8.41	10.43	-4.05	2.02e-07	3.21e-05	pyr-1	PYRimidine biosynthesis
	18629144	6.67	3.99	6.43	2.09e-07	3.28e-05	K09E3.7	hypothetical protein
	18534810	10.67	12.55	-3.69	2.09e-07	3.28e-05	col-107	COLlagen
	18511052	8.53	7.41	2.17	2.13e-07	3.32e-05	ddo-3	D-aspartate oxidase 3
	18492884	7.78	10.13	-5.12	2.15e-07	3.34e-05	B0286.3	Phosphoribosylaminoimidazole carboxylase
	18576006	8.85	11.15	-4.93	2.18e-07	3.36e-05	grd-6	GRounDhog (hedgehog-like family)
	18478566	5.55	8.74	-9.12	2.23e-07	3.41e-05	C04G6.2	hypothetical protein
	18530023	9.18	10.3	-2.16	2.23e-07	3.41e-05	Y54F10AM.8	Putative phospholipase B-like 3
	18585112	9.7	8.47	2.34	2.25e-07	3.41e-05	pak-2	Serine/threonine-protein kinase pak-2
	18570777	9.58	11.35	-3.4	2.29e-07	3.45e-05	F53F1.4	hypothetical protein
	18596853	9.33	8.18	2.22	2.32e-07	3.48e-05	T23B12.6	hypothetical protein
	18602543	6.54	9.03	-5.61	2.35e-07	3.51e-05	adt-1	ADAMTS family
	18551393	6.2	4.43	3.4	2.39e-07	3.54e-05	his-31	Histone H4
	18457330	5.24	6.74	-2.82	2.39e-07	3.54e-05	F59C6.11	hypothetical protein
	18615398	5.89	3.63	4.8	2.41e-07	3.55e-05
	18633764	6.99	5.52	2.77	2.51e-07	3.59e-05	ZC53.1	hypothetical protein
	18476427	7.89	6.82	2.09	2.5e-07	3.59e-05	ztf-23	Zinc finger putative Transcription Factor family
	18472362	9.06	11.96	-7.48	2.48e-07	3.59e-05	R12E2.15	hypothetical protein
	18485698	9.19	7.93	2.39	2.47e-07	3.59e-05	gbas-1	Ga Binding and Activating and Spk (SPK) domain containing
	18570960	8.57	9.85	-2.42	2.51e-07	3.59e-05	nid-1	NIDogen (basement membrane protein)
	18560844	8.36	11.75	-10.49	2.46e-07	3.59e-05	ZK180.6	hypothetical protein
	18610456	4.12	6.17	-4.13	2.53e-07	3.59e-05	col-174	COLlagen
	18587135	6.44	4.81	3.09	2.57e-07	3.61e-05	F14D7.2	hypothetical protein
	18475964	9.01	7.64	2.58	2.56e-07	3.61e-05	mbtr-1	Malignant brain tumor repeat protein 1
	18552037	7.11	5.54	2.96	2.59e-07	3.62e-05	F32E10.5	hypothetical protein
	18516242	8.61	11.64	-8.14	2.64e-07	3.63e-05	col-88	COLlagen
	18501892	8.72	10.26	-2.89	2.63e-07	3.63e-05	tts-2	ncRNA
	18505735	8.96	11.74	-6.87	2.63e-07	3.63e-05	col-71	COLlagen
	18470039	11.04	12.15	-2.16	2.73e-07	3.74e-05	smd-1	S-adenosylmethionine decarboxylase beta chain
	18568976	7.31	6.07	2.35	2.78e-07	3.77e-05	best-14	Bestrophin homolog 14
	18536463	7.59	9.87	-4.87	2.77e-07	3.77e-05	F08G5.6	hypothetical protein
	18532223	8.57	7.33	2.36	2.86e-07	3.85e-05	ZK688.9	TIP41-like protein
	18605111	7.56	6.48	2.11	2.86e-07	3.85e-05	C33A11.2	hypothetical protein
	18556504	4.93	6.85	-3.77	2.91e-07	3.87e-05	T22D1.11	hypothetical protein
	18551650	8.55	10.35	-3.48	2.9e-07	3.87e-05	pcp-2	Prolyl Carboxy Peptidase like
	18510959	9.4	6.94	5.5	2.99e-07	3.92e-05	col-98	COLlagen
	18629185	5.33	3.93	2.62	2.96e-07	3.92e-05	set-12	Histone-lysine N-methyltransferase
	18486839	6.41	4.42	3.96	2.99e-07	3.92e-05	M151.3	hypothetical protein
	18621274	6.36	4.14	4.66	3.01e-07	3.92e-05	fbxa-170	F-box A protein
	18484118	6.21	4.95	2.4	3e-07	3.92e-05	F42G4.5	hypothetical protein
	18542252	7.62	5.43	4.57	3.05e-07	3.93e-05	cav-1	Caveolin
	18582663	7.68	6.6	2.12	3.08e-07	3.94e-05	C04F5.9	hypothetical protein
	18623015	7.34	4.73	6.08	3.07e-07	3.94e-05	inx-2	Innexin-2
	18481012	4.95	7.37	-5.33	3.1e-07	3.95e-05	C56C10.4	hypothetical protein
	18550608	8.62	7.6	2.04	3.11e-07	3.95e-05	D1046.2	hypothetical protein
	18602379	6.89	5.17	3.3	3.14e-07	3.96e-05	vang-1	VANG (Van Gogh/Strabismus planar polarity protein) homolog
	18460593	8.25	9.54	-2.45	3.21e-07	4.04e-05	haf-4	HAlF transporter (PGP related)
	18563297	9	10.56	-2.96	3.23e-07	4.04e-05	asp-10	ASpartyl Protease
	18624199	3.52	5.77	-4.78	3.27e-07	4.08e-05	abu-2	Activated in Blocked Unfolded protein response
	18575114	7.14	8.84	-3.25	3.32e-07	4.08e-05	T06A1.5	hypothetical protein
	18582341	5.85	8.23	-5.19	3.37e-07	4.08e-05	C02E7.7	hypothetical protein
	18523746	9.07	7.83	2.36	3.37e-07	4.08e-05	evl-18	hypothetical protein
	18555643	7.58	5.35	4.69	3.35e-07	4.08e-05	T04A11.1; T04A11.4	hypothetical protein
	18555654	7.58	5.35	4.69	3.35e-07	4.08e-05	T04A11.1; T04A11.4	hypothetical protein
	18595609	6.09	8.14	-4.13	3.4e-07	4.11e-05	T06E4.8	hypothetical protein
	18631357	7.86	6.37	2.82	3.5e-07	4.16e-05	nfya-1	Nuclear transcription Factor Y, A (alpha) subunit
	18556780	8.54	9.98	-2.72	3.49e-07	4.16e-05	T28F3.8	hypothetical protein
	18632586	6.92	8.65	-3.33	3.48e-07	4.16e-05	cgr-1	CRAL/TRIO and GOLD domain suppressor of activated Ras
	18523094	9.58	11.71	-4.36	3.6e-07	4.21e-05	col-91	Putative cuticle collagen 91
	18587205	5.93	4	3.82	3.62e-07	4.21e-05	F14H3.3	hypothetical protein
	18596755	6.99	8.36	-2.58	3.57e-07	4.21e-05	T21C9.9	hypothetical protein
	18587219	6.48	4.7	3.45	3.61e-07	4.21e-05	F14H3.5	hypothetical protein
	18544421	5.73	8.16	-5.41	3.59e-07	4.21e-05	col-115	COLlagen
	18527221	10.56	11.7	-2.21	3.65e-07	4.23e-05	ech-6	Probable enoyl-CoA hydratase, mitochondrial
	18453993	7.65	8.89	-2.37	3.68e-07	4.23e-05	pes-7	Patterned Expression Site
	18609707	6.87	9.55	-6.41	3.68e-07	4.23e-05	F38B6.4	hypothetical protein
	18618965	9.03	10.16	-2.2	3.71e-07	4.24e-05	scav-1	SCAVenger receptor (CD36 family) related
	18568985	5.7	8.57	-7.3	3.82e-07	4.27e-05	col-152	COLlagen
	18616896	6.87	5.14	3.31	3.79e-07	4.27e-05	W06D11.1	hypothetical protein
	18472635	5.29	3.96	2.51	3.76e-07	4.27e-05	T04D3.1	hypothetical protein
	18551505	7.58	6.42	2.23	3.82e-07	4.27e-05	F20C5.3	hypothetical protein
	18540635	7.2	8.61	-2.67	3.82e-07	4.27e-05	dod-17	Downstream Of DAF-16 (regulated by DAF-16)
	18555281	9.88	8.78	2.15	3.8e-07	4.27e-05	R102.5	hypothetical protein
	18566958	8.84	10.5	-3.17	3.84e-07	4.28e-05	bcl-11	mammalian BCL (B cell lymphoma) gene homologs
	18466869	5.08	7.27	-4.57	3.88e-07	4.31e-05	C54G4.4	hypothetical protein
	18520846	7.91	9.12	-2.32	3.91e-07	4.31e-05	C05D2.8	hypothetical protein
	18627016	7.51	5.49	4.05	4.02e-07	4.41e-05	meg-3	hypothetical protein
	18549409	9.01	10.41	-2.65	4.01e-07	4.41e-05	dod-24	Downstream Of DAF-16 (regulated by DAF-16)
	18563197	6.84	7.95	-2.16	4.06e-07	4.43e-05	hex-2	HEXosaminidase
	18617831	6.21	7.4	-2.29	4.15e-07	4.46e-05	set-30	SET (trithorax/polycomb) domain containing
	18539581	8.99	7.18	3.51	4.12e-07	4.46e-05	cyp-31A2	CYtochrome P450 family
	18486751	5.24	6.42	-2.26	4.15e-07	4.46e-05	col-76	COLlagen
	18488531	5.85	6.95	-2.15	4.11e-07	4.46e-05	ctg-2	CRAL/TRIO and GOLD domain containing
	18481543	6.41	8.75	-5.05	4.18e-07	4.47e-05	F01D5.6	hypothetical protein
	18628482	7.58	4.86	6.57	4.2e-07	4.48e-05	meg-2	hypothetical protein
	18526222	9.6	7.93	3.19	4.24e-07	4.51e-05	egg-2	EGG sterile (unfertilizable)
	18588591	7.87	10.46	-6.03	4.31e-07	4.52e-05	F26F2.10	hypothetical protein
	18583919	6.95	8.29	-2.52	4.3e-07	4.52e-05	ugt-48	Putative UDP-glucuronosyltransferase ugt-48
	18572283	9.85	11.29	-2.71	4.32e-07	4.52e-05	K03B8.6	hypothetical protein
	18508114	10.25	9.13	2.17	4.31e-07	4.52e-05	B0393.3	hypothetical protein
	18481429	8.91	10.32	-2.67	4.37e-07	4.56e-05	cut-4	CUTiclin
	18597556	7.94	9.09	-2.22	4.41e-07	4.58e-05	lec-10	Galectin
	18605568	7.15	5.75	2.63	4.44e-07	4.6e-05	meg-4	hypothetical protein
	18467264	5.55	7.56	-4.03	4.48e-07	4.63e-05	pqn-26	Prion-like-(Q/N-rich)-domain-bearing protein
	18630081	5.67	4.14	2.88	4.59e-07	4.7e-05	R04D3.2	hypothetical protein
	18462778	7.44	6.21	2.35	4.65e-07	4.73e-05	let-49	Mediator of RNA polymerase II transcription subunit 7
	18486863	6.72	4.52	4.59	4.71e-07	4.77e-05	M151.7	hypothetical protein
	18592262	6.78	9.83	-8.33	4.72e-07	4.77e-05	H23N18.5	hypothetical protein
	18528124	6.26	4.81	2.73	4.75e-07	4.78e-05	T24C4.2	hypothetical protein
	18610838	6.55	4.99	2.94	4.79e-07	4.8e-05	F47G3.3	hypothetical protein
	18529034	9.33	7.86	2.78	4.86e-07	4.86e-05	unc-71	hypothetical protein
	18633148	8.11	6.79	2.49	4.91e-07	4.87e-05	ekl-5	hypothetical protein
	18635373	6.73	8.7	-3.91	4.91e-07	4.87e-05
	18530398	8.35	9.8	-2.74	4.96e-07	4.87e-05	Y56A3A.7; mir-8211	hypothetical protein; ncRNA
	18616168	7.1	10.36	-9.54	4.95e-07	4.87e-05	alh-13	Glutamate 5-kinase
	18498386	6.19	7.33	-2.2	4.96e-07	4.87e-05	mth-1	MeTHuselah (Drosophila aging-associated GPCR) homolog
	18595414	9.96	11.37	-2.65	5.05e-07	4.88e-05	T05E12.6	hypothetical protein
	18457672	6.91	5.83	2.12	5.05e-07	4.88e-05	ulp-5	Ubiquitin-Like Protease
	18582419	9.8	11.8	-4.01	5.02e-07	4.88e-05	abu-7	Activated in Blocked Unfolded protein response
	18489229	7.35	9.14	-3.45	5.03e-07	4.88e-05	slc-36.2	SLC (SoLute Carrier) homolog
	18572509	5.5	8.2	-6.5	5e-07	4.88e-05	swt-5	SWEET sugar transporter family
	18584753	6.27	7.61	-2.53	5.1e-07	4.91e-05	C35A5.3	hypothetical protein
	18588557	5.14	6.76	-3.08	5.19e-07	4.92e-05	F26F12.4	hypothetical protein
	18569293	8.03	6.98	2.07	5.14e-07	4.92e-05	ztf-28	Zinc finger putative Transcription Factor family
	18587902	8.68	9.88	-2.3	5.19e-07	4.92e-05	F20G2.2	hypothetical protein
	18515212	9.27	8.23	2.06	5.23e-07	4.92e-05	T04A8.8	hypothetical protein
	18527591	8.99	10.07	-2.12	5.26e-07	4.92e-05	T16G12.1	hypothetical protein
	18609739	8.59	7.26	2.5	5.25e-07	4.92e-05	F38E9.1	hypothetical protein
	18489186	7.62	9.02	-2.64	5.34e-07	4.97e-05	gst-13	Glutathione S-Transferase
	18465957	6.58	4.34	4.73	5.46e-07	5.06e-05	nhr-2	Nuclear hormone receptor family member nhr-2
	18452649	7.49	6.29	2.28	5.47e-07	5.06e-05	C37A5.7	hypothetical protein
	18551642	9.89	10.96	-2.1	5.59e-07	5.09e-05	pcp-3	Prolyl Carboxy Peptidase like
	18480434	10.1	12.03	-3.81	5.64e-07	5.09e-05	tag-297	hypothetical protein
	18622594	7.96	6.27	3.24	5.64e-07	5.09e-05	E02H4.6	hypothetical protein
	18453316	8.79	7.61	2.27	5.63e-07	5.09e-05	glh-2	ATP-dependent RNA helicase glh-2
	18529027	8.41	7.28	2.19	5.55e-07	5.09e-05	cec-7	C.Elegans Chromodomain protein
	18484064	8.62	7.49	2.19	5.56e-07	5.09e-05	F42A8.3	hypothetical protein
	18631594	6.08	7.99	-3.77	5.64e-07	5.09e-05	T13G4.4	hypothetical protein
	18610548	8.11	9.28	-2.26	5.53e-07	5.09e-05	ptr-24	PaTched Related family
	18592394	8.87	6.51	5.15	5.75e-07	5.16e-05	cdr-4	CaDmium Responsive
	18516793	6.81	5.77	2.06	5.82e-07	5.2e-05	orc-4	ORC (Origin Recognition Complex) subunit
	18471685	9.13	11.61	-5.6	5.85e-07	5.21e-05	col-65	COLlagen
	18603369	10.03	11.18	-2.22	5.91e-07	5.25e-05	C07D8.6	hypothetical protein
	18582416	9.72	11.62	-3.74	6.08e-07	5.27e-05	abu-6	Activated in Blocked Unfolded protein response
	18569519	11.35	9.45	3.73	6.05e-07	5.27e-05	mom-2	Protein mom-2
	18490928	8.17	6.44	3.33	6.11e-07	5.27e-05	Y51H7C.3	hypothetical protein
	18530388	8.35	10.03	-3.2	6.12e-07	5.27e-05	Y56A3A.6	hypothetical protein
	18486620	5.08	7.56	-5.56	6.13e-07	5.27e-05	M02G9.1	hypothetical protein
	18536454	4.5	5.98	-2.8	6.08e-07	5.27e-05	ugt-65	UDP-GlucuronosylTransferase
	18565902	6.24	7.62	-2.6	6.02e-07	5.27e-05	D1054.8	hypothetical protein
	18579862	9.26	8.14	2.17	6.02e-07	5.27e-05	Y59A8B.21	hypothetical protein
	18460564	8.94	7.79	2.22	6.23e-07	5.3e-05	W04A8.6	hypothetical protein
	18474445	8.42	9.77	-2.54	6.23e-07	5.3e-05	W10C8.5	hypothetical protein
	18571734	5.67	7.94	-4.83	6.23e-07	5.3e-05	dgat-2	acyl-CoA:DiacylGlycerol AcylTransferase
	18462897	8.56	9.67	-2.16	6.19e-07	5.3e-05	ptr-21	PaTched Related family
	18580224	5.79	4.46	2.51	6.31e-07	5.35e-05	ztf-25	Zinc finger putative Transcription Factor family
	18495241	6.98	5.41	2.96	6.45e-07	5.39e-05	fbxc-32	F-box C protein
	18582764	6.03	8.25	-4.63	6.44e-07	5.39e-05	cyp-35C1	CYtochrome P450 family
	18527786	7.15	9.82	-6.41	6.45e-07	5.39e-05	T17H7.7	hypothetical protein
	18458542	8.8	9.8	-2.01	6.4e-07	5.39e-05	gsa-1	G protein, Subunit Alpha
	18630051	4.94	6.62	-3.22	6.53e-07	5.39e-05	R04B3.3	hypothetical protein
	18601095	7.66	6.49	2.24	6.51e-07	5.39e-05	Y97E10AR.3	hypothetical protein
	18596461	7.38	10.07	-6.48	6.54e-07	5.39e-05	T19A5.3	hypothetical protein
	18452187	5.41	8.34	-7.6	6.5e-07	5.39e-05	C30F8.3	hypothetical protein
	18539486	6.82	8.09	-2.41	6.57e-07	5.4e-05	F58G6.7	hypothetical protein
	18535969	6.53	9.07	-5.83	6.66e-07	5.46e-05	atic-1	5-Aminoimidazole-4-carboxamide ribonucleotide formylTransferase/IMP Cyclohydrolase homolog
	18495865	4.83	3.58	2.39	6.77e-07	5.46e-05	C46E10.8	hypothetical protein
	18524645	9.02	7.75	2.41	6.77e-07	5.46e-05	ztf-1	Zinc finger transcription factor family protein 1
	18464121	8.13	9.7	-2.97	6.74e-07	5.46e-05	ptr-23	PaTched Related family
	18562774	9.33	8	2.52	6.82e-07	5.46e-05	cpg-4	Chondroitin proteoglycan 4
	18624603	8.77	10.45	-3.21	6.75e-07	5.46e-05	ifd-2	Intermediate filament protein ifd-2
	18475981	8.94	6.77	4.51	6.76e-07	5.46e-05
	18484224	9.41	8.32	2.13	6.87e-07	5.46e-05	dna-2	yeast DNA helicase/endonuclease family
	18493049	8.6	7.57	2.04	6.87e-07	5.46e-05	B0432.7	hypothetical protein
	18593909	8.91	10.13	-2.32	6.85e-07	5.46e-05	ugt-47	Putative UDP-glucuronosyltransferase ugt-47
	18625874	8.55	9.58	-2.05	6.87e-07	5.46e-05	tni-1	Troponin I 1
	18472072	9.36	8.15	2.32	6.92e-07	5.47e-05	M04F3.5	hypothetical protein
	18461168	8.87	7.69	2.27	6.95e-07	5.48e-05	aap-1	phosphoinositide kinase AdAPter subunit
	18458199	6.65	8.27	-3.09	7.02e-07	5.52e-05	K12C11.3	hypothetical protein
	18560642	8.19	7.13	2.09	7.05e-07	5.53e-05	mans-4	alpha-1,2-Mannosidase
	18501178	7.99	9.95	-3.89	7.13e-07	5.56e-05	cpg-7	Chondroitin proteoglycan 7
	18483668	8.66	7.62	2.05	7.13e-07	5.56e-05	zfp-2	Zinc Finger Protein
	18631081	11.48	12.48	-2.01	7.19e-07	5.59e-05	trap-2	Translocon-associated protein subunit beta
	18468420	8.4	7.38	2.04	7.32e-07	5.66e-05	F25H5.5	hypothetical protein
	18615865	8.01	9.68	-3.19	7.32e-07	5.66e-05	myo-2	Myosin-2
	18590720	8.13	7.04	2.13	7.42e-07	5.72e-05	vha-18	Probable V-type proton ATPase subunit H 1
	18500266	8.23	6.79	2.71	7.43e-07	5.72e-05	btb-19	BTB (Broad/complex/Tramtrack/Bric a brac) domain protein
	18608626	7.05	9.75	-6.46	7.46e-07	5.72e-05	pes-8	Patterned Expression Site
	18462176	9.5	7.77	3.33	7.49e-07	5.73e-05	Y48G1A.2	hypothetical protein
	18560696	8.53	7.37	2.24	7.54e-07	5.75e-05	rde-8	hypothetical protein
	18582396	4.31	6.01	-3.24	7.63e-07	5.78e-05	abu-8	Activated in Blocked Unfolded protein response
	18514466	7.39	10.02	-6.19	7.64e-07	5.78e-05	R07E5.4	hypothetical protein
	18458565	11.1	12.12	-2.03	7.64e-07	5.78e-05	R06C1.4	hypothetical protein
	18451973	10.42	9.29	2.2	7.69e-07	5.79e-05	C25A1.1	hypothetical protein
	18511149	4.79	6.11	-2.49	7.73e-07	5.81e-05	F23F12.13	hypothetical protein
	18620038	10.97	12.51	-2.91	7.77e-07	5.82e-05	C15C7.5	hypothetical protein
	18473971	9.97	8.94	2.05	7.83e-07	5.82e-05	pri-2	DNA PRImase homolog
	18459649	6.08	7.18	-2.14	7.87e-07	5.82e-05	set-18	SET (trithorax/polycomb) domain containing
	18580589	5.31	7.23	-3.78	7.84e-07	5.82e-05	cln-3.3	Battenin
	18543836	8.41	7.38	2.04	7.85e-07	5.82e-05	smgl-2	hypothetical protein
	18575870	8.76	10.05	-2.45	7.94e-07	5.86e-05	T15B7.1	hypothetical protein
	18466118	10.47	9.22	2.39	8.14e-07	5.99e-05	C36B1.11	hypothetical protein
	18482671	7.34	5.44	3.73	8.26e-07	6.01e-05	F19B10.5	hypothetical protein
	18486077	8.38	7.26	2.17	8.21e-07	6.01e-05	smg-8	Protein smg-8
	18495951	8.9	7.7	2.3	8.26e-07	6.01e-05	C47G2.4	LMBR1 domain-containing protein 2 homolog
	18485538	8.11	6.91	2.29	8.36e-07	6.03e-05	F59A6.5	hypothetical protein
	18533625	12.14	10.9	2.36	8.35e-07	6.03e-05	oma-1	hypothetical protein
	18571252	5.27	6.87	-3.01	8.39e-07	6.03e-05	F56A4.4; Y45G12C.3	hypothetical protein
	18579195	5.27	6.87	-3.01	8.39e-07	6.03e-05	F56A4.4; Y45G12C.3	hypothetical protein
	18500026	9.27	12.29	-8.07	8.31e-07	6.03e-05	col-38	COLlagen
	18528749	6.27	7.49	-2.33	8.52e-07	6.1e-05	Y1A5A.1	hypothetical protein
	18554285	9.5	8.32	2.27	8.53e-07	6.1e-05	eak-7	Enhancer of AKt-1 null
	18505530	9.56	8.29	2.4	8.78e-07	6.18e-05	jmjd-2	Lysine-specific demethylase 4
	18485759	4.27	5.83	-2.95	8.72e-07	6.18e-05	H17B01.2	hypothetical protein
	18481599	7.54	8.76	-2.32	8.76e-07	6.18e-05	F07A11.4	Ubiquitin carboxyl-terminal hydrolase
	18495320	9.1	8	2.15	8.72e-07	6.18e-05	set-4	Histone-lysine N-methyltransferase Suv4-20
	18567417	10.19	9.12	2.09	8.76e-07	6.18e-05	scc-3	Cohesin subunit scc-3
	18593828	8.35	7.29	2.08	8.82e-07	6.2e-05	R02F11.4	hypothetical protein
	18600049	8	6.78	2.33	8.9e-07	6.23e-05	Y50D4C.6	hypothetical protein
	18476637	5.28	6.78	-2.82	8.91e-07	6.23e-05	lagr-1	Probable ceramide synthase lagr-1
	18604143	5.16	6.31	-2.22	9e-07	6.25e-05	C17G1.1	hypothetical protein
	18575473	9.82	10.93	-2.16	9.04e-07	6.25e-05	T08H10.1	hypothetical protein
	18575986	6.48	9.36	-7.34	9.05e-07	6.25e-05	T16G1.2	hypothetical protein
	18456948	6.53	7.75	-2.33	9.03e-07	6.25e-05	pept-3	Peptide transporter 3
	18613669	9.69	11.01	-2.49	9.4e-07	6.31e-05	dhs-28	DeHydrogenases, Short chain
	18601944	10.51	11.87	-2.56	9.49e-07	6.31e-05	ZK6.11	hypothetical protein
	18621174	8.53	10.99	-5.51	9.61e-07	6.31e-05	col-175	COLlagen
	18457542	8.38	7.09	2.45	9.44e-07	6.31e-05	H31G24.3	hypothetical protein
	18472519	8.41	9.88	-2.77	9.21e-07	6.31e-05	dhs-3	DeHydrogenases, Short chain
	18628330	6.61	5.01	3.04	9.6e-07	6.31e-05	H29C22.1	hypothetical protein
	18521804	7.92	6.42	2.82	9.55e-07	6.31e-05	C27F2.7	Uncharacterized F-box protein C27F2.7
	18458043	8.19	10.99	-6.95	9.55e-07	6.31e-05	col-49	COLlagen
	18624172	5.27	7.29	-4.08	9.63e-07	6.31e-05	F19C6.5	hypothetical protein
	18513478	10.47	8.7	3.4	9.61e-07	6.31e-05	K03H1.7	hypothetical protein
	18601901	7.35	6.16	2.28	9.55e-07	6.31e-05	ztf-9	Zinc finger putative Transcription Factor family
	18634189	8.32	11.48	-8.96	9.39e-07	6.31e-05	wrt-4	Warthog protein 4 N-product
	18633648	5.09	7.06	-3.93	9.42e-07	6.31e-05	ZC374.2	hypothetical protein
	18469956	10.13	8.98	2.21	9.47e-07	6.31e-05	F46F11.8	hypothetical protein
	18496597	7.81	6.75	2.08	9.39e-07	6.31e-05	nhr-19	Nuclear hormone receptor family member nhr-19
	18533591	9.56	8.47	2.13	9.62e-07	6.31e-05	mes-6	Polycomb protein mes-6
	18510048	5.02	6.15	-2.18	9.69e-07	6.34e-05	C40H1.8	hypothetical protein
	18572942	6.27	5.06	2.32	9.75e-07	6.36e-05	K08F9.3	hypothetical protein
	18598293	9.33	8.3	2.05	1e-06	6.45e-05	efl-1	E2F-like (mammalian transcription factor)
	18588857	4.83	3.53	2.46	9.98e-07	6.45e-05	F29G9.7	hypothetical protein
	18462659	5.95	8.79	-7.17	1e-06	6.45e-05	col-48	COLlagen
	18581852	10.94	12.08	-2.21	1e-06	6.45e-05	col-144	COLlagen
	18603118	6.77	8.04	-2.41	1.03e-06	6.58e-05	amt-4	Ammonium transporter
	18505176	6.11	7.38	-2.4	1.04e-06	6.6e-05	Y38F1A.8	hypothetical protein
	18459176	9.66	8.27	2.63	1.04e-06	6.6e-05	pigv-1	GPI mannosyltransferase pigv-1
	18602839	6.3	7.61	-2.49	1.04e-06	6.61e-05	C04A11.1	hypothetical protein
	18614294	5.93	7.14	-2.31	1.04e-06	6.61e-05	scav-5	SCAVenger receptor (CD36 family) related
	18592490	7.22	8.96	-3.33	1.06e-06	6.65e-05	K02E11.7	hypothetical protein
	18479179	9.39	8.31	2.12	1.06e-06	6.65e-05	nasp-1	NASP (human Nuclear Autoantigenic Sperm Protein) homolog
	18630129	7.62	8.89	-2.42	1.07e-06	6.72e-05	ifd-1	Intermediate filament protein ifd-1
	18453143	8.63	7.48	2.21	1.08e-06	6.73e-05	C50F2.2	hypothetical protein
	18629818	6.26	8.85	-6.03	1.09e-06	6.78e-05	R02E4.3	hypothetical protein
	18631811	5.93	8.09	-4.48	1.09e-06	6.78e-05	cdf-2	Cation Diffusion Facilitator family
	18631392	8.6	9.83	-2.33	1.11e-06	6.85e-05	acdh-10	Probable medium-chain specific acyl-CoA dehydrogenase 10, mitochondrial
	18582922	6.67	8.08	-2.65	1.11e-06	6.87e-05	ugt-17	UDP-GlucuronosylTransferase
	18476956	8.46	11.19	-6.65	1.12e-06	6.88e-05	Y71G12B.25	hypothetical protein
	18458907	7.2	5.63	2.98	1.13e-06	6.89e-05	T04D3.8	hypothetical protein
	18465047	8.21	6.66	2.94	1.14e-06	6.89e-05	C04F12.1	hypothetical protein
	18613318	8.03	9.37	-2.53	1.14e-06	6.89e-05	pbo-4	Na(+)/H(+) exchanger protein 7
	18492671	7.99	6.45	2.92	1.14e-06	6.89e-05	ZK970.7	hypothetical protein
	18593566	4.62	7.13	-5.69	1.13e-06	6.89e-05	M03E7.4	hypothetical protein
	18565963	6.13	8.87	-6.65	1.14e-06	6.89e-05	D1086.3	hypothetical protein
	18611737	7.21	8.27	-2.08	1.14e-06	6.89e-05	sec-22	yeast SEC homolog
	18598762	9.02	7.95	2.1	1.15e-06	6.92e-05	mes-4	Histone-lysine N-methyltransferase mes-4
	18569753	5.67	3.21	5.5	1.16e-06	6.98e-05	F40G12.11	hypothetical protein
	18496450	5.27	4.06	2.32	1.17e-06	6.98e-05	dmsr-4	DroMyoSuppressin Receptor related
	18571050	7.02	5.75	2.41	1.17e-06	6.99e-05	F55A11.8	hypothetical protein
	18521843	8.83	7.57	2.39	1.18e-06	7.01e-05	C28A5.1	hypothetical protein
	18523865	10.45	9.35	2.14	1.19e-06	7.02e-05	bath-41	BTB and MATH domain-containing protein 41
	18562596	3.99	5.27	-2.44	1.2e-06	7.03e-05	fbxa-157	F-box A protein
	18456490	12.17	11	2.26	1.19e-06	7.03e-05	mex-3	Muscle EXcess
	18490831	4.5	6.19	-3.22	1.19e-06	7.03e-05	Y51B9A.12	ncRNA
	18544856	8.82	7.76	2.09	1.2e-06	7.03e-05	Y4C6B.1	hypothetical protein
	18618858	7.16	5.83	2.53	1.2e-06	7.03e-05	C02F12.8	hypothetical protein
	18561662	10.41	9.09	2.5	1.21e-06	7.05e-05	acly-2	ATP-citrate synthase
	18523225	4.48	6.62	-4.42	1.24e-06	7.17e-05	pqn-29	Prion-like-(Q/N-rich)-domain-bearing protein
	18466030	4.1	5.7	-3.02	1.24e-06	7.17e-05	C34B2.9	hypothetical protein
	18512728	8	6.87	2.19	1.24e-06	7.17e-05	F56D2.2	hypothetical protein
	18526565	9.94	8.91	2.03	1.25e-06	7.2e-05	mcm-5	DNA replication licensing factor mcm-5
	18505983	11.61	10.6	2.02	1.26e-06	7.27e-05	wee-1.3	Membrane-associated tyrosine-and threonine-specific cdc2-inhibitory kinase wee-1.3
	18530151	6.48	7.49	-2.01	1.27e-06	7.29e-05	lec-6	Galectin
	18551197	6.53	8.14	-3.05	1.27e-06	7.31e-05	F13B6.2	hypothetical protein
	18611315	7.87	6.39	2.79	1.27e-06	7.31e-05	F52D2.12; F52D2.6	hypothetical protein
	18475219	5.53	7.86	-5.03	1.28e-06	7.34e-05	Y18H1A.9	hypothetical protein
	18579399	7.48	6.2	2.42	1.29e-06	7.35e-05	skr-7	SKp1 Related (ubiquitin ligase complex component)
	18594733	10.43	9.09	2.53	1.3e-06	7.38e-05	cdt-2	CDT (S. pombe CDC10 Dependent Transcript) homolog
	18539068	7.26	8.53	-2.41	1.31e-06	7.39e-05	F55G11.8	hypothetical protein
	18461467	8.3	7.22	2.1	1.31e-06	7.41e-05	Y23H5A.2	hypothetical protein
	18517498	7.88	6.85	2.05	1.32e-06	7.44e-05	mcm-10	yeast MCM (licensing factor) related
	18585365	8.16	5.99	4.49	1.34e-06	7.51e-05	C50E3.11	hypothetical protein
	18497331	7.96	10.38	-5.38	1.35e-06	7.55e-05	col-17	COLlagen
	18525231	6.34	8.88	-5.83	1.35e-06	7.55e-05	H10E21.4	hypothetical protein
	18594950	4.89	6.22	-2.52	1.36e-06	7.55e-05	T02B5.3	Carboxylic ester hydrolase
	18498949	10.84	12.33	-2.8	1.36e-06	7.55e-05	ram-2	hypothetical protein
	18578769	5.16	6.41	-2.38	1.36e-06	7.55e-05	Y39D8A.1	hypothetical protein
	18539603	7.79	6.75	2.06	1.39e-06	7.67e-05	H04M03.3	hypothetical protein
	18625016	7.91	5.42	5.64	1.4e-06	7.67e-05	F31F6.1	hypothetical protein
	18577326	6.44	8.63	-4.55	1.4e-06	7.67e-05	mlt-11; W01F3.4	hypothetical protein; ncRNA
	18615536	4.21	6.33	-4.35	1.41e-06	7.73e-05	col-168	COLlagen
	18495360	7.67	9.03	-2.56	1.41e-06	7.73e-05	shn-1	SHaNk (SH3/ankyrin domain scaffold protein) related
	18609313	8.25	6.37	3.66	1.43e-06	7.73e-05	F31B9.3	hypothetical protein
	18465867	8.07	9.86	-3.46	1.42e-06	7.73e-05	sem-2	hypothetical protein
	18613096	4.52	6.56	-4.12	1.42e-06	7.73e-05	K07E3.9	hypothetical protein
	18452507	10.26	9.17	2.13	1.42e-06	7.73e-05	imp-1	IntraMembrane Protease (IMPAS) family
	18553914	7.7	6.58	2.17	1.43e-06	7.73e-05	inx-7	Innexin
	18485785	8.8	7.69	2.16	1.45e-06	7.79e-05	madf-3	MADF domain transcription factor
	18496377	5.42	6.45	-2.05	1.45e-06	7.79e-05	D1022.4	hypothetical protein
	18452059	5.08	7.7	-6.14	1.46e-06	7.8e-05	nas-36	Zinc metalloproteinase nas-36
	18456764	6.28	7.98	-3.25	1.46e-06	7.8e-05	F55H12.3	hypothetical protein
	18472184	8.21	9.89	-3.2	1.46e-06	7.8e-05	myo-1	Myosin-1
	18616902	7.83	5.41	5.34	1.47e-06	7.81e-05	W06D11.3	hypothetical protein
	18622488	5.49	6.79	-2.45	1.47e-06	7.82e-05	nspc-17	Nematode Specific Peptide family, group C
	18614769	7.33	9.02	-3.21	1.48e-06	7.84e-05	grd-14	GRounDhog (hedgehog-like family)
	18556993	8.73	7.52	2.31	1.48e-06	7.85e-05	pig-1	Maternal embryonic leucine zipper kinase
	18505335	7.78	9.28	-2.82	1.51e-06	7.95e-05	Y46D2A.2	hypothetical protein
	18500038	10.21	9.05	2.23	1.53e-06	7.99e-05	F54D10.5	hypothetical protein
	18523691	6.74	8.09	-2.56	1.54e-06	7.99e-05	F28F5.6	hypothetical protein
	18571184	8.8	7.47	2.51	1.54e-06	7.99e-05	capg-2	CAP-G condensin subunit
	18586061	10.89	9.76	2.18	1.54e-06	7.99e-05	zhit-1	Zinc finger, HIT-type
	18522398	8.75	10.39	-3.13	1.56e-06	8.03e-05	mec-12	Tubulin alpha-3 chain
	18459842	8.96	7.51	2.74	1.56e-06	8.04e-05	gna-2	Glucosamine phosphate N-Acetyl transferase
	18483062	5.25	7.94	-6.45	1.57e-06	8.06e-05	phg-1	Growth arrest-specific protein 1 homolog
	18586029	9.84	8.68	2.22	1.58e-06	8.11e-05	C56A3.4	hypothetical protein
	18530774	7.42	6.39	2.05	1.58e-06	8.11e-05	Y75B8A.18	hypothetical protein
	18517212	6.92	4.98	3.83	1.59e-06	8.13e-05	Y41C4A.11	hypothetical protein
	18493140	7.25	10.54	-9.77	1.61e-06	8.19e-05	sqt-1	Cuticle collagen sqt-1
	18627311	7.23	6.21	2.03	1.64e-06	8.31e-05	csb-1	human CSB (Cockayne Syndrome B) homolog
	18520749	10.14	11.38	-2.35	1.66e-06	8.33e-05	mel-32	Serine hydroxymethyltransferase
	18459023	6.15	8.1	-3.88	1.65e-06	8.33e-05	T06A4.3	hypothetical protein
	18626210	7.41	10.49	-8.45	1.66e-06	8.33e-05	F46C8.8	hypothetical protein
	18527284	10.09	11.42	-2.52	1.66e-06	8.33e-05	umps-1	Uridine MonoPhosphate Synthetase
	18464231	8.79	10.22	-2.7	1.69e-06	8.46e-05	haf-9	HAlF transporter (PGP related)
	18500541	8.6	7.51	2.13	1.7e-06	8.5e-05	fut-3	FUcosyl Transferase
	18620174	6.66	7.81	-2.22	1.71e-06	8.53e-05	inx-1	Innexin
	18543615	9.99	8.55	2.73	1.72e-06	8.55e-05	Y11D7A.7; Y11D7A.21	hypothetical protein; ncRNA
	18476569	5.45	7.04	-3.01	1.75e-06	8.67e-05	Y65B4BL.6	hypothetical protein
	18572310	9.95	8.92	2.04	1.83e-06	8.97e-05	noca-1	NOn-Centrosomal microtubule Array
	18484745	6.72	9.02	-4.92	1.83e-06	8.98e-05	efl-3	E2F-like (mammalian transcription factor)
	18579975	3.93	5.76	-3.58	1.89e-06	9.21e-05	Y60A3A.23	hypothetical protein
	18569790	5.57	7.17	-3.03	1.9e-06	9.23e-05	cyp-33C5	CYtochrome P450 family
	18633603	5.29	8.61	-9.98	1.94e-06	9.34e-05	mab-7	Protein male abnormal 7
	18579661	6.1	7.42	-2.49	1.95e-06	9.38e-05	grdn-1	GiRDiN (mammalian actin-binding protein) homolog
	18465398	10.05	8.99	2.08	1.95e-06	9.38e-05	C17D12.7	hypothetical protein
	18504941	8.06	6.17	3.7	1.95e-06	9.39e-05	Y25C1A.14	hypothetical protein
	18458712	7.31	8.38	-2.11	2.02e-06	9.4e-05	inx-16	Innexin-16
	18571305	5.71	4.58	2.18	2e-06	9.4e-05	F57A10.4	hypothetical protein
	18462391	11.33	9.55	3.44	1.98e-06	9.4e-05	Y51F10.2	hypothetical protein
	18512707	11.45	10.4	2.07	2.01e-06	9.4e-05	F56C9.3	hypothetical protein
	18486426	8.94	7.59	2.55	1.98e-06	9.4e-05	clec-88	C-type LECtin
	18471546	10.94	9.71	2.35	1.97e-06	9.4e-05	egg-6	Leucine-rich repeat-containing protein egg-6
	18510144	7.68	6.66	2.03	1.99e-06	9.4e-05	C45G9.2	Uncharacterized tRNA-dihydrouridine synthase-like protein C45G9.2
	18571589	4.27	5.46	-2.29	2.01e-06	9.4e-05	F58E6.13	hypothetical protein
	18627287	4.86	5.91	-2.06	2e-06	9.4e-05	F53B3.3	hypothetical protein
	18510107	8.71	7.61	2.14	2.03e-06	9.4e-05	com-1	Completion Of Meiotic recombination (budding yeast Com) related
	18461117	6.73	5.62	2.15	2.01e-06	9.4e-05	Y106G6H.16	hypothetical protein
	18506618	6.15	8.6	-5.46	2.02e-06	9.4e-05	ZC101.1	hypothetical protein
	18465198	7.97	9.09	-2.18	1.99e-06	9.4e-05	lin-10	Protein lin-10
	18476414	6.44	5.17	2.41	1.98e-06	9.4e-05	mod-5	Transporter
	18519805	9.82	8.8	2.03	1.97e-06	9.4e-05	mcm-6	DNA replication licensing factor mcm-6
	18604638	11.57	12.64	-2.09	2.01e-06	9.4e-05	cpr-6	Cathepsin B-like cysteine proteinase 6
	18473381	6.88	5.8	2.11	2.03e-06	9.42e-05	T22C1.4	hypothetical protein
	18474920	9.16	8.07	2.14	2.07e-06	9.56e-05	Y106G6H.6	hypothetical protein
	18591187	11.12	12.37	-2.37	2.07e-06	9.56e-05	col-155	Putative cuticle collagen 155
	18582880	5.62	7.12	-2.84	2.08e-06	9.57e-05	fbxa-156	F-box A protein
	18567935	9.65	12.25	-6.06	2.08e-06	9.57e-05	sqt-3	Cuticle collagen 1
	18497931	5.45	4.11	2.53	2.1e-06	9.62e-05	sea-1	T-box transcription factor 18
	18632829	7.28	8.41	-2.18	2.13e-06	9.68e-05	W03G11.4	hypothetical protein
	18532400	9.97	8.78	2.28	2.13e-06	9.7e-05	B0035.6	hypothetical protein
	18561435	6.28	7.6	-2.49	2.15e-06	9.7e-05	ugt-1	UDP-GlucuronosylTransferase
	18586626	8.49	5.8	6.46	2.17e-06	9.7e-05	F08F3.6	hypothetical protein
	18590015	9.9	8.75	2.22	2.16e-06	9.7e-05	gon-14	hypothetical protein
	18480833	4.57	6.4	-3.56	2.17e-06	9.7e-05	col-68	COLlagen
	18456630	6.26	7.86	-3.03	2.14e-06	9.7e-05	dhs-2	DeHydrogenases, Short chain
	18626959	6.54	9.79	-9.47	2.17e-06	9.7e-05	abu-12	Activated in Blocked Unfolded protein response
	18543443	7.19	6.11	2.11	2.16e-06	9.7e-05	Y116A8C.13	hypothetical protein
	18557156	7.21	8.62	-2.67	2.17e-06	9.7e-05	Y105C5A.13; Y105C5A.12	hypothetical protein
	18595831	10.07	9.06	2.01	2.21e-06	9.83e-05	vps-39	related to yeast Vacuolar Protein Sorting factor
	18541928	7.19	6.13	2.08	2.24e-06	9.95e-05	zim-1	Zinc finger In Meiosis
	18550294	7.15	8.44	-2.45	2.24e-06	9.95e-05	C49C3.10	hypothetical protein
	18480548	7.07	5.76	2.48	2.25e-06	9.96e-05	C41H7.3	hypothetical protein
	18591845	6.1	7.39	-2.44	2.25e-06	9.96e-05	flr-2	hypothetical protein
	18472367	6.01	8.17	-4.46	2.26e-06	9.99e-05	R12E2.6	hypothetical protein
	18528778	6.69	8.53	-3.57	2.26e-06	0.0001	cht-4	CHiTinase
	18566806	7.66	4.69	7.84	2.28e-06	0.0001	clec-7	C-type LECtin
	18617964	7.87	6.84	2.05	2.29e-06	0.0001	ZK402.3	hypothetical protein
	18544229	7.91	9.03	-2.19	2.28e-06	0.0001	hpo-6	hypothetical protein
	18602245	5.86	7.16	-2.46	2.31e-06	0.0001	B0272.4	hypothetical protein
	18605443	8.16	9.48	-2.49	2.31e-06	0.0001	C35C5.10	hypothetical protein
	18530594	8.75	9.76	-2.01	2.31e-06	0.0001	Y71H2AM.13	hypothetical protein
	18463648	6.09	7.41	-2.5	2.34e-06	0.0001	nas-30	Zinc metalloproteinase nas-30
	18553369	7.89	9.38	-2.82	2.39e-06	0.0001	mec-17	Alpha-tubulin N-acetyltransferase 1
	18557177	7.02	4.85	4.51	2.4e-06	0.0001	Y105C5A.8	hypothetical protein
	18465747	9.89	8.58	2.48	2.41e-06	0.0001	C30F12.4	hypothetical protein
	18573751	6.01	7.17	-2.23	2.42e-06	0.0001	R02F11.2	hypothetical protein
	18596788	6.39	4.47	3.78	2.41e-06	0.0001	T22F3.11	hypothetical protein
	18523851	9.77	8.73	2.05	2.44e-06	0.0001	isw-1	Chromatin-remodeling complex ATPase chain isw-1
	18457472	7.29	6.23	2.08	2.5e-06	0.0001	hus-1	human HUS1 related
	18509439	3.4	5.87	-5.57	2.51e-06	0.0001	C29F9.2	hypothetical protein
	18476805	9	7.83	2.25	2.58e-06	0.0001	supr-1	SUPpressor of Rpm-1
	18568934	5.39	6.92	-2.89	2.6e-06	0.0001	F32D8.3	hypothetical protein
	18458967	9.62	7.96	3.16	2.6e-06	0.0001	T05F1.2	hypothetical protein
	18592473	5.87	8.63	-6.75	2.59e-06	0.0001	K02E11.10	hypothetical protein
	18532049	7.59	5.46	4.39	2.61e-06	0.0001	cdc-25.3	M-phase inducer phosphatase cdc-25.3
	18536706	8.21	7.14	2.11	2.62e-06	0.0001	F13G11.3	hypothetical protein
	18528508	7.27	8.3	-2.04	2.61e-06	0.0001	W06F12.2	hypothetical protein
	18473952	7.16	8.45	-2.45	2.66e-06	0.0001	lbp-5	Fatty acid-binding protein homolog 5
	18500149	6.55	4.55	4.01	2.66e-06	0.0001	F54D5.5	hypothetical protein
	18486907	5.97	8.39	-5.34	2.66e-06	0.0001	M195.2	hypothetical protein
	18504527	9.44	11.85	-5.34	2.67e-06	0.0001	mlt-8	hypothetical protein
	18502526	7.88	8.9	-2.03	2.68e-06	0.0001	T04B8.5	hypothetical protein
	18511545	9.49	8.44	2.06	2.68e-06	0.0001	wdr-48	WD repeat-containing protein 48 homolog
	18520278	9.07	7.86	2.32	2.69e-06	0.0001	abi-1	ABl Interactor homolog
	18535775	4.67	6.66	-3.96	2.69e-06	0.0001	C52D10.3	hypothetical protein
	18506385	7.75	6.02	3.32	2.73e-06	0.0001	tag-276	hypothetical protein
	18628210	9.38	10.53	-2.22	2.74e-06	0.0001	hke-4.2	Histidine-rich membrane protein KE4 homolog 2
	18527310	8	6.25	3.37	2.74e-06	0.0001	tbx-9	T-box transcription factor tbx-9
	18529043	8.51	9.57	-2.09	2.77e-06	0.0001	Y37D8A.16	hypothetical protein
	18515076	4.81	6.55	-3.34	2.76e-06	0.0001	T02C1.1	Uncharacterized RING finger protein T02C1.1
	18502108	3.69	6.28	-6.01	2.79e-06	0.0001	nas-23	Zinc metalloproteinase nas-23
	18587689	8.93	7.69	2.36	2.79e-06	0.0001	ets-6	ETS class transcription factor
	18524166	7.84	6.77	2.1	2.77e-06	0.0001	nhr-20	Nuclear hormone receptor family member nhr-20
	18609993	5.69	8.42	-6.63	2.77e-06	0.0001	F40E10.5	hypothetical protein
	18584449	7.43	5.8	3.11	2.79e-06	0.0001	C29F3.3	hypothetical protein
	18469011	10.01	8.94	2.1	2.79e-06	0.0001	spd-2	Spindle-defective protein 2
	18598228	7.77	6.65	2.18	2.82e-06	0.0001	W09D12.1	hypothetical protein
	18492805	8.32	9.35	-2.04	2.83e-06	0.0001	B0228.7	S-methyl-5-thioadenosine phosphorylase
	18604953	7.95	9.65	-3.26	2.86e-06	0.0001	C29F7.2	hypothetical protein
	18463292	7.43	8.57	-2.2	2.87e-06	0.0001	tln-1	TaLiN
	18521153	5.99	4.81	2.27	2.91e-06	0.0001	bath-15	BTB and MATH domain-containing protein 15
	18630585	9.38	10.4	-2.04	2.92e-06	0.0001	asp-4	ASpartyl Protease
	18495027	6.33	7.43	-2.14	2.95e-06	0.0001	C27H5.4	hypothetical protein
	18516786	8.54	7.26	2.42	2.95e-06	0.0001	orc-1	ORC (Origin Recognition Complex) subunit
	18534119	9.07	7.91	2.22	2.96e-06	0.0001	vha-7	V-type proton ATPase subunit a
	18511239	8.83	7.55	2.43	2.96e-06	0.0001	nop-1	Pseudocleavage protein nop-1
	18604404	6.06	7.5	-2.72	3e-06	0.0001	C23H4.3	hypothetical protein
	18535282	8.01	9.84	-3.56	3.02e-06	0.0001	col-14	COLlagen
	18615544	8.49	9.93	-2.7	3.02e-06	0.0001	col-167	COLlagen
	18635339	7.74	6.48	2.39	3.03e-06	0.0001
	18500653	7.74	6.58	2.24	3.05e-06	0.0001	fbf-1	Fem-3 mRNA-binding factor 1
	18535009	5.24	7.44	-4.61	3.05e-06	0.0001	C42D4.2	hypothetical protein
	18508574	6.32	7.8	-2.78	3.07e-06	0.0001	bas-1	Biogenic Amine Synthesis related
	18566839	5.84	4.82	2.03	3.07e-06	0.0001	glc-1	Glutamate-gated chloride channel alpha
	18459947	10.83	9.82	2.02	3.08e-06	0.0001	sqv-5	Chondroitin sulfate synthase sqv-5
	18482740	7.87	6.84	2.04	3.08e-06	0.0001	rbbp-5	Retinoblastoma-binding protein homolog 5
	18577279	8.53	7.08	2.73	3.11e-06	0.0001	dgtr-1	DGAT (acyl-CoA:DiacylGlycerol AcylTransferase) Related
	18552934	8.14	6.5	3.13	3.11e-06	0.0001	F49F1.5	hypothetical protein
	18593943	5.79	7.14	-2.55	3.11e-06	0.0001	twk-13	TWiK family of potassium channels
	18608850	10.19	8.66	2.89	3.16e-06	0.0001	mrp-4	hypothetical protein
	18596532	10.04	8.66	2.6	3.19e-06	0.0001	dvc-1	SprT-like domain-containing protein Spartan
	18585144	6.29	4.98	2.48	3.2e-06	0.0001	C45H4.14	hypothetical protein
	18540695	9.56	10.7	-2.21	3.23e-06	0.0001	LLC1.2	hypothetical protein
	18634523	6.48	5	2.8	3.23e-06	0.0001
	18634531	6.48	5	2.8	3.23e-06	0.0001
	18617910	6.51	9.77	-9.56	3.22e-06	0.0001	wrt-6	Warthog protein 6
	18482964	3.25	4.45	-2.29	3.24e-06	0.0001	F26G1.10	hypothetical protein
	18555847	8.24	9.28	-2.06	3.25e-06	0.0001	kgb-1	GLH-binding kinase 1
	18455302	8.45	9.68	-2.35	3.27e-06	0.0001	maph-1.1	Microtubule-Associated Protein Homolog
	18459731	9.52	8.4	2.16	3.26e-06	0.0001	T22C1.5	hypothetical protein
	18601311	9.14	8.11	2.04	3.28e-06	0.0001	mre-11	Double-strand break repair protein mre-11
	18625034	7.73	5.47	4.79	3.32e-06	0.0001	F31F6.2	hypothetical protein
	18612320	6.65	4.88	3.41	3.34e-06	0.0001	ttr-42	TransThyretin-Related family domain
	18632949	5.13	6.59	-2.76	3.35e-06	0.0001	dot-1.3	Histone-lysine N-methyltransferase, H3 lysine-79 specific
	18579173	5.66	7.06	-2.63	3.36e-06	0.0001	Y45G12C.1	hypothetical protein
	18535340	9.63	10.9	-2.41	3.37e-06	0.0001	C46G7.1	hypothetical protein
	18547573	6.65	4.95	3.25	3.41e-06	0.0001	tbx-36	Putative T-box protein 36
	18479405	6.83	5.59	2.36	3.41e-06	0.0001	C16C8.12	hypothetical protein
	18585377	6.7	5.57	2.19	3.41e-06	0.0001	C50E3.13	hypothetical protein
	18471303	8.83	7.37	2.75	3.41e-06	0.0001	mut-2	MUTator
	18630825	8.26	9.36	-2.15	3.4e-06	0.0001	got-1.2	Probable aspartate aminotransferase, cytoplasmic
	18622486	5.2	7.1	-3.74	3.45e-06	0.0001	nspc-18	Nematode Specific Peptide family, group C
	18571464	5.88	7.05	-2.26	3.45e-06	0.0001	F57G8.5	hypothetical protein
	18619236	7.04	9.22	-4.54	3.47e-06	0.0001	C05E7.2	hypothetical protein
	18598528	8.95	10.15	-2.31	3.48e-06	0.0001	pcp-4	Prolyl Carboxy Peptidase like
	18582317	8.83	9.84	-2.02	3.53e-06	0.0001	nra-4	Nicotinic Receptor Associated
	18523371	8.24	6.74	2.82	3.55e-06	0.0001	polk-1	DNA polymerase kappa
	18600069	9.57	8.4	2.24	3.56e-06	0.0001	unc-61	hypothetical protein
	18455805	9.06	7.98	2.11	3.55e-06	0.0001	mrt-1	MoRTal germline
	18573672	8.49	9.55	-2.08	3.57e-06	0.0001	cpz-2	CathePsin Z
	18457752	10.22	9.13	2.13	3.57e-06	0.0001	K04F10.3	hypothetical protein
	18604780	6.6	8.92	-4.96	3.59e-06	0.0001	C26B9.3	hypothetical protein
	18556570	6.85	8.15	-2.46	3.59e-06	0.0001	T23F6.3	hypothetical protein
	18482844	7.27	5.69	3	3.6e-06	0.0001	F22E5.17	hypothetical protein
	18543113	6.81	8.54	-3.3	3.65e-06	0.0001	W08E12.5; W08E12.4	hypothetical protein
	18484237	5.84	3.43	5.33	3.67e-06	0.0001	F43G6.10	hypothetical protein
	18454210	8.15	9.18	-2.05	3.67e-06	0.0001	sem-4	hypothetical protein
	18563133	9.2	10.25	-2.07	3.66e-06	0.0001	clec-48	C-type LECtin
	18488633	7.58	8.83	-2.38	3.69e-06	0.0001	agxt-1	Serine--pyruvate aminotransferase
	18494406	4.03	8.14	-17.3	3.69e-06	0.0001	acdh-2	Acyl CoA DeHydrogenase
	18546684	10.39	9.23	2.23	3.7e-06	0.0001	xpc-1	XPC (Xeroderma Pigmentosum group C) DNA repair gene homolog
	18518935	6.39	7.76	-2.59	3.79e-06	0.0001	Y75B8A.4	Lon protease homolog 2, peroxisomal
	18621219	5.47	7.14	-3.2	3.79e-06	0.0001	C36B7.5	hypothetical protein
	18463539	8.22	7.04	2.26	3.78e-06	0.0001	nyn-2	NYN domain ribonuclease homolog
	18586798	9.21	8.13	2.11	3.78e-06	0.0001	kup-1	Protein kup-1
	18545574	6.68	8.07	-2.63	3.8e-06	0.0001	Y57G11C.42	hypothetical protein
	18468592	6.87	5.79	2.11	3.82e-06	0.0001	nmat-2	Nicotinamide/nicotinic acid mononucleotide adenylyltransferase 2
	18568746	10.87	9.86	2.01	3.81e-06	0.0001	picc-1	PAC-1 Interacting Coiled-Coil protein
	18568886	11.78	10.73	2.07	3.82e-06	0.0001	mcm-7	DNA helicase
	18466522	5.27	7	-3.32	3.84e-06	0.0001	phat-1	PHAryngeal gland Toxin-related
	18459967	10.67	9.16	2.84	3.85e-06	0.0001	chs-1	CHitin Synthase
	18534110	5.06	7.01	-3.88	3.87e-06	0.0001	C26B2.8	hypothetical protein
	18507259	7.24	5.51	3.3	3.88e-06	0.0001	try-1	TRYpsin-like protease
	18563866	9.73	10.99	-2.39	3.97e-06	0.0001	C26F1.1	hypothetical protein
	18535532	5.79	7.02	-2.34	3.94e-06	0.0001	C49A9.6	hypothetical protein
	18601623	5.45	7.03	-2.97	3.92e-06	0.0001	ugt-5	UDP-GlucuronosylTransferase
	18613076	8.47	9.53	-2.08	3.92e-06	0.0001	K07E3.1	hypothetical protein
	18634347	8.58	11.82	-9.48	3.97e-06	0.0001
	18634353	8.58	11.82	-9.48	3.97e-06	0.0001
	18634359	8.58	11.82	-9.48	3.97e-06	0.0001
	18634365	8.58	11.82	-9.48	3.97e-06	0.0001
	18634371	8.58	11.82	-9.48	3.97e-06	0.0001
	18634381	8.58	11.82	-9.48	3.97e-06	0.0001
	18634449	8.58	11.82	-9.48	3.97e-06	0.0001
	18634453	8.58	11.82	-9.48	3.97e-06	0.0001
	18634461	8.58	11.82	-9.48	3.97e-06	0.0001
	18454813	6.32	8.29	-3.91	3.99e-06	0.0001	col-58	COLlagen
	18582685	7.32	6.3	2.03	4e-06	0.0001	C05C8.5	hypothetical protein
	18518462	6.58	7.63	-2.08	4.01e-06	0.0001	Y66D12A.13	hypothetical protein
	18523844	8.31	7.19	2.17	4.1e-06	0.0001	apc-11	Anaphase Promoting Complex; see also mat
	18466319	8.9	7.78	2.18	4.12e-06	0.0001	cmt-1	p31CoMeT related
	18483480	11.86	10.6	2.4	4.13e-06	0.0001	F35C11.5	hypothetical protein
	18599606	6.7	8.16	-2.76	4.13e-06	0.0001	Y43F8C.13	hypothetical protein
	18562012	5.44	6.82	-2.59	4.15e-06	0.0001	C01G10.9	Methylthioribose-1-phosphate isomerase
	18545820	10.5	8.88	3.07	4.17e-06	0.0001	Y65A5A.2	hypothetical protein
	18520530	6.69	8.81	-4.35	4.19e-06	0.0001	agmo-1	Alkylglycerol monooxygenase homolog
	18576780	7.59	8.7	-2.16	4.21e-06	0.0001	T25F10.3	hypothetical protein
	18574887	4.34	6.17	-3.54	4.23e-06	0.0001	lrx-1	LRP X(cross)-hybridizing
	18493664	7.56	9.25	-3.24	4.22e-06	0.0001	nas-7	Zinc metalloproteinase nas-7
	18635621	10.13	8.69	2.71	4.22e-06	0.0001
	18467284	10.84	9.14	3.25	4.26e-06	0.0001	DY3.8	hypothetical protein
	18488150	10.55	9.36	2.27	4.26e-06	0.0001	gld-3	Defective in germ line development protein 3
	18513616	8.8	7.72	2.11	4.29e-06	0.0001	apc-2	Anaphase-promoting complex subunit 2
	18534767	4.83	6.63	-3.48	4.35e-06	0.0001	nas-8	Zinc metalloproteinase nas-8
	18477545	7.96	10.73	-6.79	4.34e-06	0.0001	col-63	COLlagen
	18512040	8.74	6.86	3.68	4.35e-06	0.0001	F43D9.8	ncRNA
	18567238	10.38	12.08	-3.24	4.4e-06	0.0001	pud-1.2; pud-1.1	Protein Up-regulated in Daf-2(gf)
	18552470	7.8	6.51	2.44	4.41e-06	0.0001	F40F11.3	hypothetical protein
	18522610	8.71	7.67	2.05	4.46e-06	0.0001	C48B4.6	hypothetical protein
	18529851	9.93	8.75	2.27	4.49e-06	0.0001	pph-4.2	Serine/threonine-protein phosphatase
	18558673	8.79	7.02	3.42	4.5e-06	0.0001	Y4C6A.3	hypothetical protein
	18451717	8	9.04	-2.07	4.53e-06	0.0001	eat-16	hypothetical protein
	18556105	7.72	5.79	3.81	4.62e-06	0.0001	T12G3.6	hypothetical protein
	18515383	8.83	9.95	-2.17	4.64e-06	0.0001	T07E3.4	hypothetical protein
	18508355	6.87	5.69	2.26	4.66e-06	0.0001	C02F5.13	TM2 domain-containing protein C02F5.13
	18615570	7.2	8.21	-2.02	4.66e-06	0.0001	hum-6	Unconventional myosin heavy chain 6
	18627216	8.34	11.29	-7.7	4.7e-06	0.0001	F53B1.4	hypothetical protein
	18461969	9.33	7.94	2.62	4.73e-06	0.0001	inx-22	Innexin
	18622607	7.63	8.66	-2.03	4.79e-06	0.0001	mrp-3	hypothetical protein
	18627323	6.33	8.09	-3.39	4.79e-06	0.0001	F53H4.3	hypothetical protein
	18497443	8.73	9.95	-2.34	4.78e-06	0.0001	F13D12.9	hypothetical protein
	18468988	9.2	10.87	-3.17	4.79e-06	0.0001	cpz-1	CathePsin Z
	18610335	6.87	4.69	4.52	4.8e-06	0.0001	rgs-11	Regulator of G-protein signaling rgs-11
	18595317	5.24	6.48	-2.35	4.84e-06	0.0001	T05B4.12	hypothetical protein
	18483576	6.27	8.31	-4.1	4.86e-06	0.0001	pqn-35	Prion-like-(Q/N-rich)-domain-bearing protein
	18583523	6.33	9.22	-7.41	4.88e-06	0.0001	pqn-13	Prion-like-(Q/N-rich)-domain-bearing protein
	18475976	6.39	4.35	4.1	4.86e-06	0.0001
	18572496	7.94	8.95	-2.02	4.87e-06	0.0001	gsnl-1	Gelsolin-like protein 1
	18625208	8.19	6.76	2.71	4.91e-06	0.0001	chtl-1	Choline transporter-like protein 1
	18625685	5.79	8.29	-5.66	4.92e-06	0.0001	col-173	COLlagen
	18517533	8.57	7.51	2.09	4.93e-06	0.0001	cku-70	Caenorhabditis KU
	18517141	10.66	9.11	2.92	4.96e-06	0.0001	Y39E4B.5	hypothetical protein
	18522915	7.68	6.49	2.28	4.96e-06	0.0001	E_BE45912.2	hypothetical protein
	18471482	10.72	9.64	2.11	4.98e-06	0.0001	K07A1.17	hypothetical protein
	18628019	6.92	8.56	-3.11	5e-06	0.0001	F59F4.1	Acyl-coenzyme A oxidase
	18493473	7.05	5.62	2.69	5.01e-06	0.0001	clec-147	C-type LECtin
	18508907	10.55	9.46	2.13	5.03e-06	0.0001	plk-1	Serine/threonine-protein kinase plk-1
	18598700	10.01	11.65	-3.12	5.03e-06	0.0001	pud-1.2; pud-1.1	Protein Up-regulated in Daf-2(gf)
	18528106	7.19	8.3	-2.16	5.02e-06	0.0001	xbx-5	X-BoX promoter element regulated
	18459781	7.06	8.28	-2.33	5.04e-06	0.0001	pgrn-1	ProGRaNulin homolog
	18532461	6.99	8.64	-3.13	5.11e-06	0.0001	faah-2	Fatty Acid Amide Hydrolase homolog
	18532838	9.39	8.35	2.06	5.09e-06	0.0001	cpna-3	CoPiNe domain protein, Atypical
	18535158	6.21	7.4	-2.28	5.11e-06	0.0001	fbxc-1; fbxc-5	F-box C protein
	18535167	6.21	7.4	-2.28	5.11e-06	0.0001	fbxc-2; fbxc-4; fbxc-3	F-box C protein
	18535171	6.21	7.4	-2.28	5.11e-06	0.0001	fbxc-2; fbxc-4; fbxc-3	F-box C protein
	18535175	6.21	7.4	-2.28	5.11e-06	0.0001	fbxc-1; fbxc-5	F-box C protein
	18599266	5.28	4.23	2.07	5.11e-06	0.0001	ztf-20	Zinc finger putative Transcription Factor family
	18512220	8.39	9.98	-3.01	5.08e-06	0.0001	lon-1	LONg
	18541631	9.18	8.14	2.05	5.1e-06	0.0001	him-6	Bloom syndrome protein homolog
	18507773	11.08	9.56	2.86	5.13e-06	0.0001	egg-1	EGG sterile (unfertilizable)
	18558601	9.93	8.46	2.77	5.14e-06	0.0001	fbxa-215	F-box A protein
	18499462	6.25	5.16	2.13	5.16e-06	0.0001	ceh-83	C. Elegans Homeobox
	18574924	7.31	8.34	-2.05	5.2e-06	0.0001	T05B11.1	hypothetical protein
	18478256	5.49	6.74	-2.37	5.21e-06	0.0001	clh-2	Chloride channel protein
	18458205	8.62	9.73	-2.16	5.24e-06	0.0002	dapk-1	DAP (Death-Associated Protein) Kinase homolog
	18480101	9.68	8.07	3.05	5.25e-06	0.0002	szy-4	Suppressor of ZYg-1
	18587225	9.69	7.57	4.37	5.25e-06	0.0002	F14H3.6	hypothetical protein
	18505077	7.47	5.63	3.6	5.26e-06	0.0002	nspe-6	Nematode Specific Peptide family, group E
	18557527	10	8.65	2.55	5.27e-06	0.0002	flh-1	FLYWCH zinc finger transcription factor homolog
	18472432	10.57	9.24	2.51	5.31e-06	0.0002	rskn-1	Putative ribosomal protein S6 kinase alpha-1
	18608026	7.54	8.65	-2.17	5.31e-06	0.0002	F13E6.5	hypothetical protein
	18520651	11.07	9.95	2.17	5.36e-06	0.0002	rnr-2	Ribonucleoside-diphosphate reductase small chain
	18602314	7.06	5.77	2.44	5.45e-06	0.0002	nhx-1	Sodium/hydrogen exchanger
	18579740	7.31	5.94	2.59	5.45e-06	0.0002	hmit-1.2	H(+) MyoInositol coTransporter
	18634086	5.42	8.06	-6.24	5.46e-06	0.0002	ZK470.6	hypothetical protein
	18553006	6.43	7.82	-2.61	5.47e-06	0.0002	F52G2.3	hypothetical protein
	18496809	5.55	8.08	-5.78	5.48e-06	0.0002	F01D5.10	hypothetical protein
	18615258	8.12	9.53	-2.66	5.53e-06	0.0002	ugt-50	Putative UDP-glucuronosyltransferase ugt-50
	18584177	10.39	9.06	2.52	5.57e-06	0.0002	mcm-3	DNA helicase
	18458112	8.61	7.39	2.32	5.59e-06	0.0002	atm-1	Serine/threonine-protein kinase ATM
	18465129	8.1	6.92	2.26	5.56e-06	0.0002	C06A5.8	hypothetical protein
	18598838	7.55	9.22	-3.17	5.57e-06	0.0002	Y32F6B.1	Solute carrier organic anion transporter family member
	18574166	8.13	6.64	2.82	5.58e-06	0.0002	R11D1.1	hypothetical protein
	18578427	6.58	7.59	-2.02	5.56e-06	0.0002	crp-1	Cdc-42 Related Protein
	18606250	6.81	8.06	-2.37	5.59e-06	0.0002	C46F2.1	hypothetical protein
	18472652	6.17	4.63	2.9	5.64e-06	0.0002	T04D3.5	hypothetical protein
	18490151	6.24	4.67	2.95	5.66e-06	0.0002	sri-40	Serpentine Receptor, class I
	18505204	7.89	8.92	-2.05	5.66e-06	0.0002	Y39G8B.1	hypothetical protein
	18549389	10.69	9.12	2.97	5.66e-06	0.0002	C31H1.8	hypothetical protein
	18489778	8.45	7.25	2.3	5.66e-06	0.0002	taf-6.1	TAF (TBP-associated transcription factor) family
	18567397	8.3	9.89	-3.01	5.77e-06	0.0002	F17C11.6	hypothetical protein
	18614817	5.67	7.55	-3.68	5.76e-06	0.0002	T01B6.1	hypothetical protein
	18506837	6.91	5.85	2.08	5.78e-06	0.0002	him-14	MutS protein homolog him-14
	18484400	4.84	3.81	2.03	5.81e-06	0.0002	btb-6	BTB (Broad/complex/Tramtrack/Bric a brac) domain protein
	18557028	6.79	8.21	-2.68	5.84e-06	0.0002	egl-20	hypothetical protein
	18542829	4.77	5.93	-2.24	5.93e-06	0.0002	W01B6.4	hypothetical protein
	18577369	9.41	7.63	3.45	5.93e-06	0.0002	era-1	Embryonic mRna (mRNA) Anterior
	18622000	8.95	10.96	-4.01	5.91e-06	0.0002	C49F8.3	hypothetical protein
	18524693	6.34	7.49	-2.21	5.99e-06	0.0002	nhl-1	RING finger protein nhl-1
	18632541	6.95	5.65	2.47	6.03e-06	0.0002	ceh-21	Homeobox protein ceh-21
	18546479	7.44	8.89	-2.72	6.03e-06	0.0002	pqn-89	Prion-like-(Q/N-rich)-domain-bearing protein
	18614327	5.36	7.05	-3.23	6.02e-06	0.0002	R07B1.9	hypothetical protein
	18465432	10.72	9.09	3.11	6.04e-06	0.0002	marc-3	MARCH (Membrane-Associated Ring finger (C3HC4)) homolog
	18537796	6.11	7.24	-2.19	6.09e-06	0.0002	F36H1.11	hypothetical protein
	18633520	8.83	9.97	-2.2	6.1e-06	0.0002	Y7A5A.1	hypothetical protein
	18569962	8.37	7.25	2.17	6.11e-06	0.0002	F43H9.4	hypothetical protein
	18555874	11.05	9.82	2.36	6.12e-06	0.0002	daf-18	hypothetical protein
	18459824	9.68	8.44	2.37	6.14e-06	0.0002	hpo-24; T23D8.11	Protein argonaute; ncRNA
	18605531	6.68	5.54	2.2	6.16e-06	0.0002	C35C5.8	hypothetical protein
	18501661	4.86	6.62	-3.38	6.19e-06	0.0002	col-77	COLlagen
	18613516	4.37	5.6	-2.35	6.19e-06	0.0002	K11E4.2	hypothetical protein
	18466311	8.56	7.52	2.06	6.21e-06	0.0002	C41D11.3	hypothetical protein
	18599135	7.38	6.35	2.03	6.21e-06	0.0002	Y39B6A.10	hypothetical protein
	18534616	5.13	6.17	-2.05	6.23e-06	0.0002	C32H11.3	hypothetical protein
	18492165	8.38	5.51	7.34	6.33e-06	0.0002	ZK177.1	hypothetical protein
	18493059	8.89	7.82	2.1	6.37e-06	0.0002	B0432.8	hypothetical protein
	18479992	10.5	9.2	2.46	6.36e-06	0.0002	C27D9.1	hypothetical protein
	18630455	8.23	5.82	5.33	6.37e-06	0.0002	R09F10.8	hypothetical protein
	18569819	11.18	12.19	-2	6.37e-06	0.0002	grd-5	GRounDhog (hedgehog-like family)
	18543694	7.49	6.2	2.45	6.39e-06	0.0002	set-21	SET (trithorax/polycomb) domain containing
	18508842	9.09	7.98	2.16	6.39e-06	0.0002	C14B1.2	hypothetical protein
	18502847	7.14	10.2	-8.34	6.4e-06	0.0002	T06D8.10	hypothetical protein
	18505048	9.53	7.94	3.01	6.47e-06	0.0002	Y38E10A.14	hypothetical protein
	18490252	6.63	9.42	-6.93	6.48e-06	0.0002	ptr-18	PaTched Related family
	18559968	9	7.84	2.23	6.5e-06	0.0002	mdf-2	MAD (yeast Mitosis arrest DeFicient) related
	18504874	10.6	9.44	2.24	6.5e-06	0.0002	mcm-2	DNA helicase
	18562755	8.9	7.62	2.43	6.5e-06	0.0002	catp-3	Cation transporting ATPase
	18551206	8.78	10.13	-2.54	6.52e-06	0.0002	F13B6.3	hypothetical protein
	18527805	7.82	10.53	-6.56	6.53e-06	0.0002	T19C3.2	hypothetical protein
	18462547	9.48	8.44	2.05	6.54e-06	0.0002	nfya-2	Nuclear transcription Factor Y, A (alpha) subunit
	18604729	6.3	8.7	-5.27	6.55e-06	0.0002	C25F6.7	hypothetical protein
	18461431	8.54	7.48	2.08	6.63e-06	0.0002	pif-1	ATP-dependent DNA helicase PIF1
	18498531	5.5	8.54	-8.26	6.65e-06	0.0002	F33A8.7	hypothetical protein
	18566952	8.25	6.9	2.55	6.7e-06	0.0002	F13A7.14	hypothetical protein
	18458611	7.59	6.37	2.33	6.7e-06	0.0002	ztf-15	Zinc finger putative Transcription Factor family
	18477880	12.08	10.55	2.88	6.7e-06	0.0002	mex-6	Zinc finger protein mex-6
	18508703	13.02	11.72	2.47	6.7e-06	0.0002	cpg-1	Chondroitin proteoglycan 1
	18616284	5.18	7.24	-4.18	6.73e-06	0.0002	ram-5	hypothetical protein
	18537845	9.5	8.35	2.22	6.72e-06	0.0002	lin-3	Protein lin-3
	18474221	7.89	9	-2.15	6.72e-06	0.0002	W05F2.4	hypothetical protein
	18458105	7.12	5.64	2.78	6.76e-06	0.0002	taf-11.2	TAF (TBP-associated transcription factor) family
	18476356	9.63	8.52	2.16	6.77e-06	0.0002	cdt-1	CDT (S. pombe CDC10 Dependent Transcript) homolog
	18500445	6	8.56	-5.88	6.77e-06	0.0002	lips-9	LIPaSe related
	18521112	8.77	7.67	2.14	6.79e-06	0.0002	clk-2	Telomere length regulation protein clk-2
	18540581	6.88	8.02	-2.21	6.86e-06	0.0002	gst-4	Glutathione S-transferase 4
	18597767	8.89	7.84	2.07	6.86e-06	0.0002	W04D2.4	hypothetical protein
	18621960	5.3	3.81	2.8	6.9e-06	0.0002	C49F5.3	hypothetical protein
	18601483	12.41	11.29	2.17	6.91e-06	0.0002	spn-4	hypothetical protein
	18550584	7.15	8.3	-2.22	6.95e-06	0.0002	ilys-4	Invertebrate LYSozyme
	18488915	9.43	8.38	2.07	6.98e-06	0.0002	dpl-1	Transcription factor dpl-1
	18494950	8.38	7.3	2.12	7.01e-06	0.0002	dsh-2	DiSHevelled related
	18510612	10.15	8.86	2.44	7.04e-06	0.0002	glp-1	Protein glp-1
	18478092	4.62	5.75	-2.18	7.06e-06	0.0002	B0334.6	hypothetical protein
	18552573	8.12	6.78	2.53	7.07e-06	0.0002	F42A9.8	hypothetical protein
	18453310	11.14	12.3	-2.24	7.11e-06	0.0002	spp-17	SaPosin-like Protein family
	18612616	8.67	7.57	2.13	7.12e-06	0.0002	pdk-1	3-phosphoinositide-dependent protein kinase 1
	18494326	6.22	9.3	-8.47	7.14e-06	0.0002	skpo-2	ShK domain and PerOxidase domain containing protein
	18561405	7.36	8.99	-3.1	7.18e-06	0.0002
	18633916	8.46	9.56	-2.14	7.21e-06	0.0002	dve-1	hypothetical protein
	18553258	10.65	8.64	4.03	7.17e-06	0.0002	col-103	COLlagen
	18518881	7.37	6.12	2.38	7.21e-06	0.0002	pqn-92	Prion-like-(Q/N-rich)-domain-bearing protein
	18463813	8.52	6.41	4.34	7.18e-06	0.0002	ZC308.4	hypothetical protein
	18556861	9.76	8.73	2.05	7.2e-06	0.0002	rec-8	Meiotic recombination protein rec-8
	18499182	4.7	5.97	-2.42	7.25e-06	0.0002	fbxa-182	F-box A protein
	18581833	5.45	4.24	2.32	7.26e-06	0.0002	tag-38	hypothetical protein
	18517082	8.72	7.45	2.41	7.28e-06	0.0002	pqn-82	Prion-like-(Q/N-rich)-domain-bearing protein
	18549752	5.58	8.16	-5.99	7.27e-06	0.0002	col-131	COLlagen
	18497376	7.57	6.57	2	7.31e-06	0.0002	F12A10.8	hypothetical protein
	18482836	4.61	5.87	-2.39	7.38e-06	0.0002	F22E5.1	hypothetical protein
	18616634	7.38	9.41	-4.07	7.4e-06	0.0002	pat-9	Paralysed Arrest at Two-fold
	18530335	10.22	9.08	2.21	7.41e-06	0.0002	ung-1	Uracil DNA N-Glycosylase
	18603902	5.74	7.19	-2.74	7.44e-06	0.0002	C15B12.1	Putative sarcosine oxidase
	18518612	8.05	9.31	-2.41	7.45e-06	0.0002	alh-12	ALdehyde deHydrogenase
	18454899	9.55	8.45	2.14	7.47e-06	0.0002	prom-1	PRogression Of Meiosis
	18460111	8.65	7.3	2.55	7.49e-06	0.0002	mop-25.3	MO25-like protein 3
	18476442	6.47	7.54	-2.11	7.55e-06	0.0002	ttm-5	Putative sphingolipid delta(4)-desaturase/C4-monooxygenase
	18493026	8.28	7.03	2.38	7.58e-06	0.0002	B0432.13	hypothetical protein
	18533453	10.11	8.91	2.3	7.67e-06	0.0002	C08F8.3	hypothetical protein
	18540302	10.77	9.56	2.32	7.67e-06	0.0002	lag-1	Lin-12 And Glp-1 phenotype
	18554854	6.95	5.58	2.59	7.66e-06	0.0002	col-135	COLlagen
	18524443	9.53	8.21	2.48	7.72e-06	0.0002	skpt-1	SKP2 (S phase Kinase associated Protein Two) homolog
	18633909	9.15	7.94	2.32	7.73e-06	0.0002	ZK1193.4	hypothetical protein
	18617617	4.36	7.61	-9.52	7.79e-06	0.0002	dao-4	Dauer or Aging adult Overexpression
	18571800	5.04	6.41	-2.58	7.82e-06	0.0002	asp-8	ASpartyl Protease
	18527794	6.9	5.43	2.78	7.82e-06	0.0002	best-17	Bestrophin homolog 17
	18455031	7.46	5.88	3	7.86e-06	0.0002	F27D4.8	hypothetical protein
	18620082	6.96	8.1	-2.21	7.84e-06	0.0002	prx-3	PeRoXisome assembly factor
	18500470	6.53	4.54	3.97	7.84e-06	0.0002	F59A6.12	hypothetical protein
	18567241	10.55	12.09	-2.9	7.85e-06	0.0002	pud-2.2; pud-2.1	Protein Up-regulated in Daf-2(gf)
	18587324	10.55	12.09	-2.9	7.85e-06	0.0002	pud-2.2; pud-2.1	Protein Up-regulated in Daf-2(gf)
	18597416	10.93	9.78	2.21	7.89e-06	0.0002	T28B11.1	hypothetical protein
	18491017	6.55	7.6	-2.06	7.92e-06	0.0002	Y53F4B.11	hypothetical protein
	18611705	5.18	4.01	2.26	7.95e-06	0.0002	F54F7.2	hypothetical protein
	18548305	7.46	8.93	-2.77	7.99e-06	0.0002	C05C12.4	hypothetical protein
	18510826	7.5	6.5	2.01	8e-06	0.0002	F10E9.5	hypothetical protein
	18553896	5.25	6.58	-2.5	8e-06	0.0002	ant-1.3	Adenine Nucleotide Translocator
	18487680	10.85	9.48	2.58	8.06e-06	0.0002	perm-1	PERMeable eggshell
	18550245	10.49	9.42	2.1	8.12e-06	0.0002	ced-3	Cell death protein 3 subunit 1
	18495548	6.44	4.79	3.13	8.15e-06	0.0002	C34F11.8	hypothetical protein
	18498455	8.09	9.21	-2.18	8.15e-06	0.0002	F32A11.3	hypothetical protein
	18588709	7.61	6.55	2.08	8.18e-06	0.0002	F28F8.9	hypothetical protein
	18627158	8.3	9.7	-2.65	8.22e-06	0.0002	F52H2.6	Diminuto-like protein
	18470899	7.61	6.59	2.03	8.24e-06	0.0002	tofu-4	Twenty One u-rna (21U-RNA) biogenesis Fouled Up
	18542538	3.72	5.2	-2.79	8.32e-06	0.0002	T23F6.1	hypothetical protein
	18632123	5.44	6.5	-2.09	8.31e-06	0.0002	T22B2.6	hypothetical protein
	18520388	10.93	9.7	2.35	8.31e-06	0.0002	B0393.6	hypothetical protein
	18489645	10.13	8.82	2.48	8.31e-06	0.0002	W06B4.1	hypothetical protein
	18604439	5.54	7.42	-3.7	8.28e-06	0.0002	C23H4.7	Carboxylic ester hydrolase
	18593328	6.43	7.46	-2.05	8.32e-06	0.0002	K11D12.11	hypothetical protein
	18583804	3.89	5.28	-2.62	8.39e-06	0.0002	C17E7.13	hypothetical protein
	18470865	10.2	8.95	2.37	8.39e-06	0.0002	mei-2	Meiotic spindle formation protein 2
	18514094	6.29	5.07	2.33	8.46e-06	0.0002	ins-23	Probable insulin-like peptide alpha-type 3
	18587525	5.14	3.67	2.77	8.47e-06	0.0002	ceh-49	One cut domain family member
	18455376	8.41	9.45	-2.06	8.47e-06	0.0002	F32B5.1	hypothetical protein
	18602798	8.26	9.52	-2.39	8.48e-06	0.0002	nspc-3	Nematode Specific Peptide family, group C
	18474128	7.59	6.46	2.19	8.53e-06	0.0002	W04A8.1	hypothetical protein
	18625274	7.69	8.91	-2.33	8.56e-06	0.0002	F36G3.2	hypothetical protein
	18498238	7.26	8.41	-2.21	8.59e-06	0.0002	F27E5.3	hypothetical protein
	18619922	7.94	9.29	-2.56	8.59e-06	0.0002	C14H10.3	hypothetical protein
	18498462	7.99	10.25	-4.8	8.57e-06	0.0002	moe-3	see oma
	18480329	7.46	6.37	2.13	8.6e-06	0.0002	C33F10.4	hypothetical protein
	18621603	7.59	10.18	-6	8.61e-06	0.0002	acn-1	Inactive angiotensin-converting enzyme-related protein
	18626238	7.88	6.2	3.21	8.64e-06	0.0002	F46F2.3	hypothetical protein
	18453646	9.04	7.98	2.09	8.65e-06	0.0002	D2030.8	hypothetical protein
	18499489	5.44	7.78	-5.07	8.71e-06	0.0002	F45D11.14; F45D11.15; F45D11.16	hypothetical protein
	18499498	5.44	7.78	-5.07	8.71e-06	0.0002	F45D11.14; F45D11.15; F45D11.16	hypothetical protein
	18499507	5.44	7.78	-5.07	8.71e-06	0.0002	F45D11.14; F45D11.15; F45D11.16	hypothetical protein
	18611594	6.65	8.3	-3.15	8.75e-06	0.0002	F54B11.11	hypothetical protein
	18528412	8.68	9.94	-2.4	8.74e-06	0.0002	dnj-24	DNaJ domain (prokaryotic heat shock protein)
	18498349	8.73	7.71	2.03	8.75e-06	0.0002	rict-1	hypothetical protein
	18479063	5.36	7.49	-4.39	8.78e-06	0.0002	C09F9.2	hypothetical protein
	18562318	7.43	9.84	-5.31	8.81e-06	0.0002	fkb-3	Peptidyl-prolyl cis-trans isomerase
	18451611	6.36	8.48	-4.35	8.8e-06	0.0002	ugt-26	UDP-glucuronosyltransferase
	18528133	6.71	8.23	-2.88	8.88e-06	0.0002	T24C4.4	hypothetical protein
	18513001	10.99	9.71	2.43	8.97e-06	0.0002	zif-1	Zinc finger-interacting factor 1
	18543375	6.96	8.79	-3.56	8.94e-06	0.0002	Y105C5B.9	Phytanoyl-CoA dioxygenase domain-containing protein 1 homolog
	18452419	7.43	9.21	-3.44	8.95e-06	0.0002	pgp-2	P-GlycoProtein related
	18602815	8.77	10.1	-2.51	8.97e-06	0.0002	nspc-6; nspc-2	Nematode Specific Peptide family, group C
	18619006	8.77	10.1	-2.51	8.97e-06	0.0002	nspc-6; nspc-2	Nematode Specific Peptide family, group C
	18554730	7.93	9.11	-2.26	8.98e-06	0.0002	M04B2.6	hypothetical protein
	18635099	3.85	6.87	-8.12	9.02e-06	0.0002
	18551083	9.99	8.6	2.62	9.03e-06	0.0002	F11E6.7	hypothetical protein
	18483123	9.49	8.33	2.24	9.21e-06	0.0002	vrk-1	Serine/threonine-protein kinase VRK1
	18576093	7.72	9.85	-4.38	9.23e-06	0.0002	T19B10.2	hypothetical protein
	18548419	6.87	8.69	-3.54	9.25e-06	0.0002	C06E7.4	hypothetical protein
	18585314	6.86	8.5	-3.13	9.27e-06	0.0002	C50B6.7	Alpha-amylase
	18578647	5.71	6.95	-2.37	9.27e-06	0.0002	Y39B6A.25	hypothetical protein
	18478443	9.24	6.77	5.52	9.3e-06	0.0002	C01G6.3	hypothetical protein
	18583083	5.82	7.33	-2.85	9.37e-06	0.0002	fut-8	Alpha-(1,6)-fucosyltransferase
	18552141	8.86	9.96	-2.14	9.38e-06	0.0002	F35H10.10	hypothetical protein
	18551829	9.07	7.24	3.55	9.41e-06	0.0002	trcs-1	TRansport of membrane to Cell Surface
	18624665	7.13	9.69	-5.88	9.53e-06	0.0002	F26A10.2	hypothetical protein
	18626695	5.71	7.48	-3.4	9.57e-06	0.0002	F48C5.2	hypothetical protein
	18486657	9.29	8.29	2	9.68e-06	0.0002	vab-1	Ephrin receptor 1
	18575266	9.03	7.87	2.24	9.69e-06	0.0002	suds-3	hypothetical protein
	18519964	5.98	4.94	2.05	9.71e-06	0.0002	ZK643.2	Probable deoxycytidylate deaminase
	18576416	9.23	7.36	3.66	9.72e-06	0.0002	T21C9.13	hypothetical protein
	18478622	11.95	10.76	2.27	9.79e-06	0.0002	C05C10.5	hypothetical protein
	18618956	4.68	6.73	-4.16	9.81e-06	0.0002	C03F11.2	hypothetical protein
	18482174	10.35	8.26	4.26	9.88e-06	0.0002	F13D12.3	hypothetical protein
	18539937	10.01	8.78	2.34	9.95e-06	0.0002	lin-54	Protein lin-54
	18632007	6.48	8.8	-4.99	9.96e-06	0.0002	pgp-6	P-GlycoProtein related
	18542880	12.88	11.88	2.01	9.98e-06	0.0002	mex-5	Zinc finger protein mex-5
	18533906	6.45	8.08	-3.09	1e-05	0.0002	C18H7.11	hypothetical protein
	18618930	5.75	6.8	-2.08	1e-05	0.0002	C03B1.13	hypothetical protein
	18500156	9.54	8.26	2.43	1.01e-05	0.0002	F54D5.9	hypothetical protein
	18471935	6.37	5.25	2.17	1.02e-05	0.0002	rrf-2	RNA-dependent RNA polymerase Family
	18485564	6.82	8.52	-3.25	1.02e-05	0.0002	F59B10.3	hypothetical protein
	18595575	4.22	5.66	-2.72	1.03e-05	0.0002	T06E4.10	hypothetical protein
	18538909	8.32	7.13	2.28	1.03e-05	0.0002	egl-18	hypothetical protein
	18626121	7.19	8.27	-2.12	1.04e-05	0.0002	hum-4	Heavy chain, Unconventional Myosin
	18587679	10.03	11.41	-2.6	1.04e-05	0.0002	F19B2.5	hypothetical protein
	18560277	4.73	3.49	2.36	1.05e-05	0.0002	Y73F4A.3	hypothetical protein
	18534715	9.21	8.06	2.23	1.05e-05	0.0002	swd-2.1	Set1 WD40 repeat protein homolog
	18577319	9.46	7.04	5.35	1.05e-05	0.0002	W01F3.2	hypothetical protein
	18579402	6.58	8.68	-4.26	1.05e-05	0.0002
	18496681	6.84	5.58	2.4	1.06e-05	0.0002	E04F6.6	hypothetical protein
	18490265	7.55	6.36	2.28	1.06e-05	0.0002	cyd-1	G1/S-specific cyclin-D
	18510087	6.8	7.91	-2.16	1.07e-05	0.0002	C44B9.2	hypothetical protein
	18497150	6.78	5.77	2.02	1.08e-05	0.0002	agt-2	AlkylGuanine DNA alkylTransferase
	18521314	8.66	7.56	2.14	1.08e-05	0.0002	C13G5.2	hypothetical protein
	18451679	7.29	9.23	-3.85	1.08e-05	0.0002	C15C6.1	hypothetical protein
	18604156	7.41	5.79	3.09	1.07e-05	0.0002	C17G1.2	hypothetical protein
	18458037	8.53	7.27	2.39	1.08e-05	0.0002	K09H9.2	hypothetical protein
	18616578	6.68	7.81	-2.19	1.08e-05	0.0002	ckc-1	Choline Kinase C
	18573484	11.96	10.91	2.08	1.08e-05	0.0002	sodh-1	Alcohol dehydrogenase 1
	18537967	5.08	6.58	-2.84	1.09e-05	0.0002	clec-170	C-type LECtin
	18572833	4.56	6.06	-2.83	1.09e-05	0.0002	cyp-35A5	CYtochrome P450 family
	18625642	7.18	5.96	2.33	1.1e-05	0.0002	F41B4.3	hypothetical protein
	18506572	6.35	5.13	2.34	1.1e-05	0.0002	Y62F5A.12	hypothetical protein
	18500849	5.56	7.36	-3.48	1.09e-05	0.0002	ltd-1	Lim and Transglutaminase Domain
	18478448	8.89	10.15	-2.4	1.1e-05	0.0002	mtrr-1	Putative methionine synthase reductase
	18588415	7.65	6.58	2.1	1.1e-05	0.0002	F25H9.6	hypothetical protein
	18499163	9.79	7.69	4.28	1.11e-05	0.0002	F42A8.1	hypothetical protein
	18487533	4.02	5.42	-2.63	1.11e-05	0.0002	math-35	MATH (meprin-associated Traf homology) domain containing
	18463728	8.09	7.07	2.02	1.11e-05	0.0002	Y95D11A.3	hypothetical protein
	18489451	7.18	8.29	-2.15	1.12e-05	0.0002	W02B12.1	hypothetical protein
	18602296	7.17	9.71	-5.8	1.12e-05	0.0002	wrt-9	WaRThog (hedgehog-like family)
	18551399	7.86	8.87	-2.02	1.13e-05	0.0002	F18F11.1	hypothetical protein
	18520727	7.23	8.26	-2.03	1.14e-05	0.0002	C05D10.4	hypothetical protein
	18549694	9.52	10.58	-2.09	1.14e-05	0.0002	C35B1.5	hypothetical protein
	18577245	10.09	11.24	-2.22	1.14e-05	0.0002	npa-1	Nematode Polyprotein Allergen related
	18524196	12.32	11.01	2.48	1.15e-05	0.0002	sip-1	Stress-induced protein 1
	18604228	7.94	9.45	-2.85	1.15e-05	0.0002	C18A11.3	hypothetical protein
	18530428	6.46	5.14	2.5	1.15e-05	0.0002	tbx-33	Putative T-box protein 33
	18606138	9.86	8.25	3.06	1.16e-05	0.0002	C45B2.2	hypothetical protein
	18536045	3.41	4.51	-2.13	1.17e-05	0.0002	D2024.1	hypothetical protein
	18455438	8.09	7.07	2.03	1.17e-05	0.0002	F32H2.10	hypothetical protein
	18634405	4.87	6.35	-2.8	1.19e-05	0.0002
	18560626	10.01	9.01	2.01	1.19e-05	0.0002	orc-5	ORC (Origin Recognition Complex) subunit
	18586386	5.88	6.94	-2.08	1.2e-05	0.0002	cln-3.1	Battenin
	18489421	8.65	7.46	2.29	1.2e-05	0.0002	osta-3	Organic Solute Transporter Alpha-like protein
	18501732	9.94	8.84	2.14	1.2e-05	0.0002	nos-1	NanOS related
	18615561	7.5	8.77	-2.41	1.21e-05	0.0002	col-169	COLlagen
	18598504	7.68	5.76	3.78	1.21e-05	0.0002	Y116F11B.17; linc-51	hypothetical protein; ncRNA
	18534884	9.64	8.59	2.06	1.21e-05	0.0002	C39E9.12	hypothetical protein
	18476550	10.92	9.73	2.27	1.21e-05	0.0002	Y65B4BL.4	hypothetical protein
	18631972	7.97	9.04	-2.09	1.21e-05	0.0002	T21B6.3	hypothetical protein
	18536086	8.57	7.56	2.01	1.23e-05	0.0002	D2096.12	hypothetical protein
	18522657	8.66	7.65	2.01	1.25e-05	0.0002	cil-1	Inositol polyphosphate 5-phosphatase
	18570318	9.62	10.65	-2.03	1.25e-05	0.0002	acs-1	fatty Acid CoA Synthetase family
	18478312	6.35	8.89	-5.78	1.26e-05	0.0002	sqt-2	SQuaT
	18596641	6.57	7.64	-2.11	1.27e-05	0.0002	ugt-12	UDP-GlucuronosylTransferase
	18547366	11.53	10.04	2.82	1.28e-05	0.0002	ZK616.5	hypothetical protein
	18574882	7.86	6.49	2.59	1.28e-05	0.0002	T04H1.5	hypothetical protein
	18482757	7.41	5.54	3.65	1.27e-05	0.0002	F21H12.8	ncRNA
	18509253	8.63	7.54	2.13	1.27e-05	0.0002	eri-9	Enhanced RNAI (RNA interference)
	18522417	5.61	6.93	-2.51	1.28e-05	0.0002	C44F1.1	hypothetical protein
	18573309	7.08	5.58	2.81	1.29e-05	0.0002	K11D12.13	hypothetical protein
	18591013	9.16	7.72	2.72	1.29e-05	0.0002	F53F8.4	hypothetical protein
	18494264	6.6	5.43	2.24	1.31e-05	0.0002	fbxc-44	F-box C protein
	18616817	7.18	9.2	-4.05	1.3e-05	0.0002	lpr-3	LiPocalin-Related protein
	18488872	7.21	8.78	-2.95	1.3e-05	0.0002	vab-19	hypothetical protein
	18510234	7.24	8.3	-2.08	1.31e-05	0.0002	ptp-1	Tyrosine-protein phosphatase 1
	18573732	6.11	7.34	-2.34	1.33e-05	0.0002	R02D5.3	hypothetical protein
	18610682	8.08	9.37	-2.45	1.32e-05	0.0002	acbp-3	Acyl-CoA-binding protein homolog 3
	18475727	7.97	9.04	-2.1	1.32e-05	0.0002	Y47G6A.19	hypothetical protein
	18462850	6.62	8.46	-3.58	1.33e-05	0.0002	Y65B4BL.1	hypothetical protein
	18521598	5.71	4.29	2.67	1.32e-05	0.0002	C23G10.11	hypothetical protein
	18580737	8.79	7.59	2.3	1.33e-05	0.0002	wdr-5.3	WD repeat-containing protein wdr-5.3
	18538887	7.9	9.24	-2.53	1.33e-05	0.0002	F54D1.6	hypothetical protein
	18542469	9.21	8.2	2.01	1.34e-05	0.0003	T22D1.5	hypothetical protein
	18462207	8.09	6.94	2.23	1.34e-05	0.0003	atm-1	Serine/threonine-protein kinase ATM
	18498560	8.45	7.25	2.3	1.35e-05	0.0003	lrr-1	Leucine-Rich Repeat protein
	18522323	10.82	9.74	2.11	1.36e-05	0.0003	pal-1	Homeobox protein pal-1
	18491992	7.7	9.83	-4.36	1.36e-05	0.0003	rol-8	Cuticle collagen 6
	18623159	10.04	8.97	2.1	1.35e-05	0.0003	tts-1	ncRNA
	18552204	6.53	7.62	-2.13	1.36e-05	0.0003
	18635113	5.59	6.87	-2.43	1.36e-05	0.0003
	18499581	5.44	6.47	-2.04	1.37e-05	0.0003	drr-1	Dietary Restriction Response (WT but not eat-2 lifespan increased)
	18572216	6.06	7.15	-2.12	1.39e-05	0.0003	K02E2.6	hypothetical protein
	18484266	6.47	5.26	2.31	1.39e-05	0.0003	F43G6.7	hypothetical protein
	18548267	5.97	4.52	2.74	1.4e-05	0.0003	C05B10.17	ncRNA
	18595959	8.73	7.59	2.2	1.41e-05	0.0003
	18607574	7.92	9.33	-2.65	1.41e-05	0.0003	dhs-25	DeHydrogenases, Short chain
	18559179	7.51	8.82	-2.47	1.42e-05	0.0003	tag-273	hypothetical protein
	18561523	7.33	5.07	4.79	1.42e-05	0.0003	nlp-29	Neuropeptide-like protein 29
	18472323	7.38	9.4	-4.05	1.43e-05	0.0003	suro-1	SUPpressor of ROller
	18593225	6.98	8.47	-2.81	1.43e-05	0.0003	K10G4.3	hypothetical protein
	18578408	8.42	7.34	2.11	1.44e-05	0.0003	set-22	SET (trithorax/polycomb) domain containing
	18607926	5.52	4.39	2.19	1.44e-05	0.0003	F13C5.1	hypothetical protein
	18579010	7.65	8.74	-2.14	1.44e-05	0.0003	nlp-25	Neuropeptide-Like Protein
	18573349	5.14	7.1	-3.88	1.44e-05	0.0003	K11G9.2	Carboxylic ester hydrolase
	18532863	7.54	6.33	2.32	1.45e-05	0.0003	fem-3	FEMinization of XX and XO animals
	18563243	6.3	5.29	2.01	1.46e-05	0.0003	C14C6.2	hypothetical protein
	18459659	9.51	8.33	2.27	1.47e-05	0.0003	pash-1	PArtner of DroSHa (DRSH-1 interactor)
	18548067	4.56	5.82	-2.41	1.47e-05	0.0003	C01B10.10	hypothetical protein
	18633945	7.63	6.61	2.03	1.49e-05	0.0003	ZK154.5	hypothetical protein
	18464393	8.91	7.85	2.09	1.5e-05	0.0003	ZK973.1	hypothetical protein
	18496517	6.89	5.8	2.13	1.51e-05	0.0003	D2089.3	hypothetical protein
	18614569	8.3	10.11	-3.5	1.51e-05	0.0003	pqn-57; abu-9	Prion-like-(Q/N-rich)-domain-bearing protein; Activated in Blocked Unfolded protein response
	18589632	10.41	11.71	-2.47	1.51e-05	0.0003	folt-2	Folate-like transporter 2
	18489570	11.69	10.34	2.55	1.52e-05	0.0003	mex-1	Muscle EXcess
	18450893	8.69	7.69	2	1.52e-05	0.0003	B0205.9	hypothetical protein
	18468662	9.92	12.51	-5.98	1.52e-05	0.0003	dpy-5	Cuticle collagen dpy-5
	18608994	9.26	6.47	6.92	1.53e-05	0.0003	inx-3	Innexin-3
	18458596	9.55	7.77	3.45	1.54e-05	0.0003	cpg-3	Chondroitin proteoglycan 3
	18605342	5.14	6.14	-2	1.55e-05	0.0003	C34E7.3	hypothetical protein
	18630259	7.36	8.44	-2.12	1.56e-05	0.0003	R07E3.1	hypothetical protein
	18623969	8.59	6.06	5.79	1.6e-05	0.0003	ent-5	Equilibrative Nucleoside Transporter
	18632928	8.68	10.07	-2.63	1.6e-05	0.0003	sma-5	Mitogen-activated protein kinase sma-5
	18603967	7.2	8.35	-2.21	1.6e-05	0.0003	C15C7.7	GDP-fucose protein O-fucosyltransferase 1
	18577964	9.42	8.35	2.09	1.6e-05	0.0003	arid-1	ARID (AT-rich Interactive Domain-containing protein) homolog
	18618019	6.06	7.16	-2.14	1.6e-05	0.0003	oct-2	Organic Cation Transporter
	18537273	7.49	6.2	2.45	1.61e-05	0.0003	thn-2	THaumatiN family
	18552754	9.32	10.47	-2.21	1.63e-05	0.0003	nlp-20	Neuropeptide-Like Protein
	18538736	8.33	7.1	2.36	1.63e-05	0.0003	F52C12.1	Probable tyrosyl-DNA phosphodiesterase
	18534330	7.24	5.85	2.61	1.64e-05	0.0003	mesp-1	MEiotic SPindle
	18452402	10.34	8.91	2.69	1.65e-05	0.0003	tyr-4	TYRosinase
	18465626	6.1	7.19	-2.13	1.65e-05	0.0003	C26C6.9	hypothetical protein
	18524946	6.22	8.97	-6.73	1.66e-05	0.0003	abu-13	Activated in Blocked Unfolded protein response
	18531250	7.52	6.28	2.36	1.69e-05	0.0003	ZC155.4	hypothetical protein
	18547745	8.73	7.56	2.25	1.69e-05	0.0003	B0001.7	hypothetical protein
	18564128	6.42	5.03	2.62	1.68e-05	0.0003	hil-1	Histone H1.X
	18524372	7.67	8.69	-2.02	1.7e-05	0.0003	prk-2	Serine/threonine-protein kinase prk-2
	18534890	11.28	10.17	2.16	1.71e-05	0.0003	rfc-3	RFC (DNA replication factor) family
	18573971	6.94	8.42	-2.79	1.71e-05	0.0003	R08E5.3	hypothetical protein
	18635129	8.52	10.4	-3.68	1.72e-05	0.0003
	18483202	7.33	10.09	-6.81	1.72e-05	0.0003	pqn-32	Prion-like-(Q/N-rich)-domain-bearing protein
	18535766	4.58	6.08	-2.83	1.72e-05	0.0003	C52D10.3	hypothetical protein
	18524961	7.1	8.61	-2.84	1.72e-05	0.0003	gei-13	Gex-3-interacting protein 13
	18510464	5.86	7.32	-2.74	1.73e-05	0.0003	D2045.8	hypothetical protein
	18602897	9.64	7.43	4.62	1.74e-05	0.0003	C04B4.2	hypothetical protein
	18532120	6.6	7.77	-2.25	1.74e-05	0.0003	ZK652.8	hypothetical protein
	18605145	5.49	3.84	3.15	1.75e-05	0.0003	C33D3.3	hypothetical protein
	18593614	6.64	8.49	-3.63	1.77e-05	0.0003	M04C3.1	hypothetical protein
	18454483	3.81	5.17	-2.57	1.79e-05	0.0003	gly-19	GLYcosylation related
	18484657	4.95	7.79	-7.17	1.79e-05	0.0003	F49C5.11	hypothetical protein
	18532482	6.69	4.83	3.62	1.8e-05	0.0003	puf-7	Pumilio domain-containing protein 7
	18609505	7.11	9.3	-4.58	1.82e-05	0.0003	abu-10	Activated in Blocked Unfolded protein response
	18489549	9.36	8.28	2.12	1.84e-05	0.0003	W03C9.2	hypothetical protein
	18614926	9.58	10.8	-2.34	1.84e-05	0.0003	T02C5.1	hypothetical protein
	18457277	7.9	10.06	-4.48	1.84e-05	0.0003	F58H10.1	hypothetical protein
	18486555	8.29	7.01	2.41	1.86e-05	0.0003	K12D12.5	hypothetical protein
	18503866	5.76	4.55	2.31	1.86e-05	0.0003	T24E12.11	hypothetical protein
	18553103	8.04	9.04	-2	1.87e-05	0.0003	F55B11.1	hypothetical protein
	18454617	8.13	9.27	-2.21	1.87e-05	0.0003	blmp-1	B lymphocyte-induced maturation protein 1 homolog
	18549681	8.94	10.17	-2.35	1.88e-05	0.0003	col-113	COLlagen
	18461367	7.94	8.95	-2.02	1.88e-05	0.0003	nhx-8	Sodium/hydrogen exchanger
	18567209	5.48	7.86	-5.21	1.89e-05	0.0003	F15B9.8	hypothetical protein
	18483511	5.37	4.35	2.02	1.89e-05	0.0003	sra-14	Serpentine Receptor, class A (alpha)
	18481309	7.28	8.54	-2.41	1.9e-05	0.0003	DH11.2	hypothetical protein
	18539028	8.68	7.49	2.28	1.9e-05	0.0003	F55G11.4	hypothetical protein
	18545035	7.2	6.17	2.04	1.91e-05	0.0003	Y54G2A.36	hypothetical protein
	18567439	4.58	6.05	-2.77	1.92e-05	0.0003	F18E3.11	hypothetical protein
	18466449	9.65	10.65	-2	1.93e-05	0.0003	acbp-1	Acyl-CoA-binding protein homolog 1
	18581462	4.15	5.42	-2.42	1.93e-05	0.0003	ZK836.16	ncRNA
	18614027	7.26	8.32	-2.07	1.93e-05	0.0003	nkat-3	Nematode Kynurenine AminoTransferase
	18520285	7.35	6.24	2.17	1.95e-05	0.0003	B0336.7	hypothetical protein
	18487605	10.58	9.56	2.02	1.95e-05	0.0003	trcs-2	TRansport of membrane to Cell Surface
	18568946	7.88	9.01	-2.19	1.97e-05	0.0003	F32D8.7	hypothetical protein
	18465488	8.88	7.26	3.07	1.97e-05	0.0003	hop-1	Presenilin hop-1
	18525630	6.12	8.64	-5.73	1.98e-05	0.0003	K04H4.2	hypothetical protein
	18499362	10.25	8.86	2.63	1.98e-05	0.0003	egg-3	EGG sterile (unfertilizable)
	18559563	6.27	5.01	2.39	2e-05	0.0003	aptf-2	AP-2 Transcription Factor family
	18573392	4.1	5.28	-2.27	2e-05	0.0003	K12B6.11	hypothetical protein
	18632868	4.92	6.35	-2.68	2e-05	0.0003	W04G3.7	hypothetical protein
	18604673	8.37	9.64	-2.42	2e-05	0.0003	dlg-1	Drosophila Discs LarGe homolog
	18573143	9.78	8.78	2.01	2.01e-05	0.0003	rga-3	Rho GTPase Activating protein
	18492212	9.88	8.81	2.09	2.03e-05	0.0003	fzy-1	WD repeat-containing protein fzy-1
	18530771	9.79	8.63	2.23	2.05e-05	0.0003	gmn-1	GeMiNin homolog
	18526573	6.79	5.38	2.67	2.06e-05	0.0003	nth-1	Endonuclease III homolog
	18520714	4.25	5.75	-2.84	2.07e-05	0.0003	wht-1	ABC transporter ATP-binding protein/permease wht-1
	18572914	10.23	9.15	2.12	2.07e-05	0.0003	apx-1	Anterior pharynx in excess protein 1
	18580983	12.65	11	3.14	2.07e-05	0.0003	oma-2	hypothetical protein
	18527898	4.89	6.41	-2.86	2.08e-05	0.0003	T20B6.3	hypothetical protein
	18478064	6.42	8.84	-5.36	2.08e-05	0.0003	B0334.13	hypothetical protein
	18561801	6.72	5.44	2.42	2.09e-05	0.0003	B0507.3	hypothetical protein
	18530423	6.05	7.44	-2.62	2.09e-05	0.0003	Y66A7A.7	hypothetical protein
	18497540	6.32	7.55	-2.34	2.09e-05	0.0003	F14D2.19	hypothetical protein
	18533580	11.38	10.31	2.1	2.11e-05	0.0003	cks-1	Cyclin-dependent kinases regulatory subunit
	18597671	3.38	5.31	-3.82	2.13e-05	0.0003	W02F12.8	hypothetical protein
	18555610	7.02	8.28	-2.39	2.13e-05	0.0003	pmp-4	Peroxisomal Membrane Protein related
	18491340	7.07	5.84	2.34	2.18e-05	0.0003	Y57A10A.1	hypothetical protein
	18536490	7.72	6.7	2.02	2.2e-05	0.0003	msh-5	MSH (MutS Homolog) family
	18587490	6.6	7.78	-2.27	2.2e-05	0.0003	F16H6.10	hypothetical protein
	18584435	5.06	7.44	-5.2	2.21e-05	0.0003	wrt-8	Warthog protein 8 N-product
	18599898	7.75	8.9	-2.23	2.23e-05	0.0003	Y47D7A.13	hypothetical protein
	18507880	8.66	7.46	2.29	2.24e-05	0.0003	hse-5	D-glucuronyl C5-epimerase
	18459385	8.07	6.92	2.21	2.26e-05	0.0004	sld-2	hypothetical protein
	18606834	7.74	9.09	-2.55	2.28e-05	0.0004	acs-22	fatty Acid CoA Synthetase family
	18465601	12.94	11.5	2.72	2.28e-05	0.0004	clec-87	C-type lectin domain-containing protein 87
	18481376	7.61	10.57	-7.78	2.32e-05	0.0004	E01G4.6	hypothetical protein
	18452161	7.22	8.33	-2.15	2.35e-05	0.0004	nmur-4	NMUR (NeuroMedin U Receptor) homolog
	18483787	6.11	7.19	-2.11	2.35e-05	0.0004	sfxn-1.2	Sideroflexin
	18528139	7.49	5.72	3.41	2.36e-05	0.0004	T24C4.5	DNA primase
	18496829	6.91	7.95	-2.06	2.36e-05	0.0004	cyp-37A1	CYtochrome P450 family
	18593334	5.71	7.62	-3.75	2.35e-05	0.0004	cpt-4	Carnitine Palmitoyl Transferase
	18473582	8.23	6.63	3.02	2.35e-05	0.0004	T24D1.3	hypothetical protein
	18568819	5.46	6.81	-2.54	2.34e-05	0.0004	F31F4.1	hypothetical protein
	18578760	5.1	6.41	-2.49	2.36e-05	0.0004	Y39B6A.9	hypothetical protein
	18466585	9.3	10.42	-2.17	2.37e-05	0.0004	C48B6.10	hypothetical protein
	18585304	11.56	10.1	2.77	2.38e-05	0.0004	nasp-2	NASP (human Nuclear Autoantigenic Sperm Protein) homolog
	18591358	6.03	7.32	-2.45	2.38e-05	0.0004	daam-1	DAAM (Disheveled-Associated Activator of Morphogenesis) homolog
	18571864	7.53	8.54	-2.01	2.38e-05	0.0004	nhr-68	Nuclear Hormone Receptor family
	18632102	7.87	9.04	-2.24	2.38e-05	0.0004	T21H8.5	hypothetical protein
	18485817	6.06	5.02	2.06	2.4e-05	0.0004	H41C03.1	hypothetical protein
	18485000	12.74	11.39	2.54	2.4e-05	0.0004	puf-5	Pumilio domain-containing protein 5
	18491567	5.57	7.19	-3.07	2.43e-05	0.0004	lgc-27	Ligand-Gated ion Channel
	18575917	5.56	3.95	3.06	2.44e-05	0.0004	col-142	COLlagen
	18483150	10.03	8.64	2.63	2.45e-05	0.0004	aptf-3	AP-2 Transcription Factor family
	18473994	5.91	4.66	2.39	2.47e-05	0.0004	W02D9.7	hypothetical protein
	18606641	5.03	6.55	-2.88	2.47e-05	0.0004	clec-86	C-type LECtin
	18496869	10.82	9.78	2.05	2.53e-05	0.0004	gfat-1	Glutamine-Fructose 6-phosphate AminoTransferase homolog
	18491394	6.47	8.79	-5	2.53e-05	0.0004	Y57A10A.23	hypothetical protein
	18547578	9.75	7.02	6.67	2.55e-05	0.0004	ZK829.9	hypothetical protein
	18490377	10.22	8.44	3.43	2.55e-05	0.0004	spsb-2	SPSB (SPry and Socs Box) family
	18485341	8.77	10.93	-4.46	2.55e-05	0.0004	F56D3.1	hypothetical protein
	18548494	9.18	10.39	-2.31	2.55e-05	0.0004	swt-3	Sugar transporter SWEET
	18477726	9.7	7.65	4.15	2.55e-05	0.0004	clec-91	C-type lectin domain-containing protein 91
	18583139	5.11	6.12	-2.02	2.56e-05	0.0004	cyp-33A1	CYtochrome P450 family
	18565159	5.73	6.81	-2.12	2.59e-05	0.0004	C50B8.5	hypothetical protein
	18465275	10.86	9.41	2.73	2.59e-05	0.0004	lin-41	Protein lin-41
	18590076	8.95	7.91	2.06	2.59e-05	0.0004	F44E7.5	hypothetical protein
	18576165	8.79	10.25	-2.75	2.6e-05	0.0004	nlp-33	Neuropeptide-like protein 33
	18631523	4.89	5.91	-2.02	2.61e-05	0.0004	T10E10.4	hypothetical protein
	18497249	8.15	7.14	2.01	2.61e-05	0.0004	F10E7.11	hypothetical protein
	18526086	9.07	7.97	2.14	2.62e-05	0.0004	hat-1	Histone AcetylTransferase
	18559581	4.58	5.94	-2.56	2.62e-05	0.0004	Y62E10A.3	hypothetical protein
	18475078	7.5	8.71	-2.31	2.64e-05	0.0004	zig-9	2 (Zwei) IG domain protein
	18518415	6.97	8.55	-2.98	2.64e-05	0.0004	gly-8	Probable N-acetylgalactosaminyltransferase 8
	18515298	11.15	9.66	2.81	2.67e-05	0.0004	rmd-1	Regulator of microtubule dynamics protein 1
	18522159	9.95	8.95	2	2.68e-05	0.0004	sumv-1	Protein sumv-1
	18610435	8	6.27	3.32	2.71e-05	0.0004	F46C3.7	hypothetical protein
	18551136	8.3	7.3	2.01	2.71e-05	0.0004	F12F6.7	Probable DNA polymerase delta small subunit
	18482900	8.84	7.68	2.22	2.71e-05	0.0004	F22E5.9	hypothetical protein
	18455286	9.18	8.15	2.04	2.71e-05	0.0004	psf-2	Probable DNA replication complex GINS protein PSF2
	18581796	6.99	8.05	-2.07	2.71e-05	0.0004	nlp-34	Neuropeptide-Like Protein
	18617899	7.36	9.17	-3.51	2.73e-05	0.0004	ZK154.1	hypothetical protein
	18620842	5.38	6.61	-2.35	2.75e-05	0.0004	dpy-8	DumPY: shorter than wild-type
	18609727	4.2	6.55	-5.1	2.79e-05	0.0004	col-172	COLlagen
	18608912	6.8	8.25	-2.74	2.79e-05	0.0004	ttr-36	TransThyretin-Related family domain
	18465026	6.71	5.68	2.04	2.8e-05	0.0004	lab-1	Long Arms of the Bivalent protein
	18568988	8.49	7.33	2.23	2.81e-05	0.0004	cat-4	GTP cyclohydrolase 1
	18598738	8.12	9.47	-2.56	2.82e-05	0.0004	lys-2	LYSozyme
	18612929	8.5	5.51	7.91	2.82e-05	0.0004	K04C1.5	hypothetical protein
	18580166	11.44	9.94	2.82	2.83e-05	0.0004	col-42	COLlagen
	18495022	4.79	6.37	-2.97	2.84e-05	0.0004	C27D9.2	hypothetical protein
	18457556	6.37	7.4	-2.04	2.86e-05	0.0004	slc-36.4	SLC (SoLute Carrier) homolog
	18484034	3.97	5.27	-2.46	2.87e-05	0.0004	F41G3.3	hypothetical protein
	18583384	8.31	7.02	2.46	2.88e-05	0.0004	C13G3.1	hypothetical protein
	18630086	9.73	7.07	6.34	2.9e-05	0.0004	R04D3.3	hypothetical protein
	18509896	9.22	8.17	2.07	2.91e-05	0.0004	C38D4.4	hypothetical protein
	18452018	10.02	8.77	2.37	2.91e-05	0.0004	rsa-1	Regulator of Spindle Assembly
	18525543	8.43	7.31	2.17	2.93e-05	0.0004	brd-1	BRCA1-associated RING domain protein 1
	18547796	8.01	9.13	-2.18	2.97e-05	0.0004	B0035.13	hypothetical protein
	18477692	6.69	7.94	-2.39	2.97e-05	0.0004	ZK849.1	hypothetical protein
	18566893	8.26	6.84	2.66	2.98e-05	0.0004	F11A5.9	hypothetical protein
	18457949	9.76	8.07	3.24	2.99e-05	0.0004	dut-1	DeoxyUTPase
	18597786	4.41	3.41	2	3.01e-05	0.0004	W04E12.2	hypothetical protein
	18585667	4.28	5.32	-2.06	3.03e-05	0.0004	C53A3.2	hypothetical protein
	18524497	9.28	8.22	2.08	3.04e-05	0.0004	polh-1	POLH (DNA polymerase eta) homolog
	18494175	7.04	8.1	-2.08	3.04e-05	0.0004	C14A4.6	hypothetical protein
	18628348	6.1	5.09	2.02	3.04e-05	0.0004	H35N09.2	hypothetical protein
	18500639	4.06	5.08	-2.03	3.06e-05	0.0004	H12I13.1	hypothetical protein
	18452477	5.42	4.21	2.31	3.07e-05	0.0004	C35E7.5	hypothetical protein
	18551801	6	8.07	-4.19	3.08e-05	0.0004	aat-1	Amino Acid Transporter
	18491960	5.81	6.83	-2.02	3.09e-05	0.0004	ZK1290.13	hypothetical protein
	18537527	7.87	6.77	2.13	3.09e-05	0.0004	cec-4	C.Elegans Chromodomain protein
	18453016	11.81	10.71	2.14	3.1e-05	0.0004	C48E7.1	hypothetical protein
	18618683	8.58	9.61	-2.04	3.1e-05	0.0004	acl-12	Putative 1-acyl-sn-glycerol-3-phosphate acyltransferase acl-12
	18542388	4.64	6.56	-3.78	3.1e-05	0.0004	bus-4	hypothetical protein
	18479048	6.58	9.24	-6.32	3.11e-05	0.0004	mlt-10	hypothetical protein
	18513504	9.01	7.91	2.14	3.15e-05	0.0004	K04C2.3	hypothetical protein
	18551788	11.92	10.54	2.6	3.2e-05	0.0004	gln-5	GLutamiNe synthetase (glutamate-ammonia ligase)
	18588649	9.15	10.66	-2.86	3.21e-05	0.0004	asp-13	ASpartyl Protease
	18631470	5.4	6.73	-2.51	3.23e-05	0.0004	col-41	COLlagen
	18487986	7.27	5.32	3.86	3.24e-05	0.0004	T06D4.1	hypothetical protein
	18611731	5.43	4.4	2.04	3.25e-05	0.0004	F54F7.6	hypothetical protein
	18469164	8.91	7.83	2.12	3.28e-05	0.0005	pole-1	DNA polymerase
	18469493	6.13	7.69	-2.95	3.27e-05	0.0005	F36H2.3	hypothetical protein
	18529171	6.36	7.86	-2.83	3.28e-05	0.0005	Y39A1A.9	hypothetical protein
	18469611	9.69	8.67	2.02	3.3e-05	0.0005	sur-2	Mediator of RNA polymerase II transcription subunit 23
	18455450	8.95	7.83	2.17	3.31e-05	0.0005	thoc-3	THO Complex (transcription factor/nuclear export) subunit
	18629563	5.73	7.23	-2.83	3.37e-05	0.0005	M03F4.6	hypothetical protein
	18523700	5.23	7.61	-5.2	3.37e-05	0.0005	F30H5.3	hypothetical protein
	18520377	5.64	6.88	-2.36	3.37e-05	0.0005	B0393.4	hypothetical protein
	18607450	5.83	6.98	-2.22	3.37e-05	0.0005	spin-3	SPINster (Drosophila lysosomal permease) homolog
	18619282	6.07	7.15	-2.12	3.39e-05	0.0005	C05G5.7	hypothetical protein
	18530318	7.58	6.47	2.15	3.4e-05	0.0005	top-3	DNA topoisomerase 3
	18632783	4.95	3.89	2.09	3.41e-05	0.0005	W02H3.1	hypothetical protein
	18506114	7	8.27	-2.42	3.43e-05	0.0005	elo-9	Elongation of very long chain fatty acids protein
	18556732	6.48	7.53	-2.07	3.46e-05	0.0005	T28C6.8	hypothetical protein
	18608934	4.92	6.12	-2.3	3.48e-05	0.0005	pgp-13	P-GlycoProtein related
	18525485	4.09	5.12	-2.04	3.49e-05	0.0005	acr-5	Acetylcholine receptor subunit alpha-type acr-5
	18590202	11.02	9.88	2.21	3.51e-05	0.0005	F45F2.11	hypothetical protein
	18479040	5.12	6.89	-3.39	3.52e-05	0.0005	lips-7	LIPaSe related
	18508678	4.32	5.97	-3.14	3.53e-05	0.0005	C06G4.6	hypothetical protein
	18499672	7.2	8.7	-2.82	3.55e-05	0.0005	lin-42	Period protein homolog lin-42
	18482137	8.12	6.85	2.41	3.56e-05	0.0005	F12E12.1	hypothetical protein
	18530728	8.03	9.56	-2.91	3.58e-05	0.0005	php-3	Posterior Hox gene Paralog
	18465642	8.23	7.11	2.17	3.61e-05	0.0005	C27A12.6	hypothetical protein
	18610258	6.92	8.13	-2.32	3.62e-05	0.0005	nspc-12; nspc-15	Nematode Specific Peptide family, group C
	18520069	5.19	6.32	-2.2	3.62e-05	0.0005	fbn-1	FiBrilliN homolog
	18540265	7.86	6.75	2.16	3.68e-05	0.0005	tbce-1	TuBulin folding Cofactor E homolog
	18545521	5.94	4.75	2.28	3.68e-05	0.0005	ccch-5	CCCH-type zinc finger putative transcription factor
	18618160	4.24	5.7	-2.76	3.69e-05	0.0005	ZK662.6	hypothetical protein
	18451595	5.37	6.46	-2.13	3.7e-05	0.0005	ugt-28	UDP-GlucuronosylTransferase
	18494707	8.79	9.89	-2.14	3.76e-05	0.0005	C18E9.9	hypothetical protein
	18617532	7.73	6.03	3.26	3.76e-05	0.0005	Y75D11A.2	hypothetical protein
	18478399	5.52	7.48	-3.91	3.77e-05	0.0005	madf-5	MADF domain transcription factor
	18530290	7.79	6.57	2.33	3.81e-05	0.0005	Y56A3A.16	hypothetical protein
	18563992	7.99	6.89	2.14	3.82e-05	0.0005	C27H6.9	Mitochondrial genome maintenance exonuclease 1
	18515617	7.5	5.45	4.15	3.89e-05	0.0005	ttr-7	TransThyretin-Related family domain
	18536663	5.3	7.1	-3.48	3.9e-05	0.0005	F13B6.1	hypothetical protein
	18534598	4.35	5.76	-2.67	3.92e-05	0.0005	C32H11.8; C32H11.11	hypothetical protein
	18549420	4.35	5.76	-2.67	3.92e-05	0.0005	C32H11.8; C32H11.11	hypothetical protein
	18611199	7.62	9.63	-4.02	3.93e-05	0.0005	F49H12.5	hypothetical protein
	18633928	7.42	8.57	-2.21	3.95e-05	0.0005	mec-7	Tubulin beta-1 chain
	18523562	5.27	7.05	-3.43	3.96e-05	0.0005	F26A1.9	hypothetical protein
	18558773	7.22	9.83	-6.11	3.96e-05	0.0005	col-137	COLlagen
	18491793	7.05	4.87	4.53	3.98e-05	0.0005	nos-2	NanOS related
	18523201	7.37	8.83	-2.76	3.98e-05	0.0005	F10F2.2	Probable phosphoribosylformylglycinamidine synthase
	18606971	5	6.23	-2.35	3.99e-05	0.0005	E01G6.3	Carboxylic ester hydrolase
	18540722	4.83	6.29	-2.77	4e-05	0.0005	M01H9.5	hypothetical protein
	18530482	8.49	7.23	2.38	4.05e-05	0.0005	Y66D12A.6	hypothetical protein
	18499670	7.54	8.7	-2.24	4.05e-05	0.0005	F46F5.9	hypothetical protein
	18502487	8.02	6.52	2.82	4.07e-05	0.0005
	18532111	7.87	8.99	-2.17	4.11e-05	0.0005	cuc-1	CU (copper) Chaperonin
	18543723	7.88	6.76	2.17	4.12e-05	0.0005	Y24F12A.1	hypothetical protein
	18547112	5.68	4.35	2.51	4.14e-05	0.0005	sdz-36	SKN-1 Dependent Zygotic transcript
	18586524	6.87	7.96	-2.13	4.14e-05	0.0005	F07C3.9	hypothetical protein
	18582377	5.16	6.82	-3.16	4.15e-05	0.0005	ugt-51	UDP-GlucuronosylTransferase
	18563706	6.79	8.13	-2.54	4.17e-05	0.0005	C25D7.5	hypothetical protein
	18487612	6.01	8.26	-4.78	4.17e-05	0.0005	rol-6	Cuticle collagen rol-6
	18495222	6.35	8.27	-3.81	4.22e-05	0.0005	C31C9.2	hypothetical protein
	18475388	7	8.64	-3.11	4.25e-05	0.0005	fpn-1.1	FerroPortiN
	18480995	7.43	6.31	2.17	4.28e-05	0.0005	vps-33.2	related to yeast Vacuolar Protein Sorting factor
	18462462	9.62	7.92	3.25	4.3e-05	0.0005	Y52B11A.8	Phospholipase A2-like protein Y52B11A.8
	18466529	6.74	8.13	-2.61	4.3e-05	0.0005	phat-2	PHAryngeal gland Toxin-related
	18530635	7.51	8.82	-2.49	4.31e-05	0.0005	pho-9	intestinal acid PHOsphatase
	18546196	6.42	7.57	-2.22	4.35e-05	0.0006
	18537150	6.44	9.05	-6.11	4.36e-05	0.0006	bed-3	BED-type zinc finger putative transcription factor
	18517568	5.24	3.78	2.75	4.37e-05	0.0006	Y47D3B.12	hypothetical protein
	18549285	11.86	10.57	2.44	4.37e-05	0.0006	gln-6	GLutamiNe synthetase (glutamate-ammonia ligase)
	18508939	6.86	5.39	2.77	4.44e-05	0.0006	C16A3.2	hypothetical protein
	18570591	12.26	10.98	2.42	4.48e-05	0.0006	pos-1	POsterior Segregation
	18575610	6.36	7.66	-2.47	4.51e-05	0.0006	clec-47	C-type LECtin
	18510379	6.28	7.33	-2.08	4.54e-05	0.0006	D1044.1	Uncharacterized kinase-like protein D1044.1
	18519600	5.43	6.47	-2.05	4.55e-05	0.0006	ZK353.2	hypothetical protein
	18542052	10.19	8.92	2.42	4.57e-05	0.0006	rme-2	Receptor Mediated Endocytosis
	18575221	12.58	11.45	2.2	4.58e-05	0.0006	cyb-3	G2/mitotic-specific cyclin-B3
	18451963	6.65	5.29	2.56	4.6e-05	0.0006	acd-2	hypothetical protein
	18597011	9.93	8.33	3.05	4.6e-05	0.0006	gyg-2	GlYcoGenin like
	18633509	9.32	6.87	5.47	4.61e-05	0.0006	Y75D11A.3	hypothetical protein
	18622639	6.16	7.64	-2.78	4.61e-05	0.0006	dpy-3	DumPY: shorter than wild-type
	18544530	9.98	8.23	3.37	4.61e-05	0.0006	cyb-2.1	CYclin B
	18523071	7.51	6.51	2	4.63e-05	0.0006	F09F7.6	hypothetical protein
	18589573	7.57	6.45	2.18	4.76e-05	0.0006	F36H9.4	hypothetical protein
	18480337	6.42	8.86	-5.42	4.84e-05	0.0006	C34C6.3	hypothetical protein
	18623632	7.85	9.18	-2.5	4.87e-05	0.0006	F14B8.5	hypothetical protein
	18501575	7.96	6.93	2.04	4.88e-05	0.0006	M110.3	hypothetical protein
	18604930	4.91	3.66	2.38	4.89e-05	0.0006	C28G1.2	hypothetical protein
	18526423	5.4	6.89	-2.81	4.93e-05	0.0006	nac-2	NADC (Na+-coupled dicarboxylate transporter) family
	18559494	6.67	8.26	-3.02	4.94e-05	0.0006	Y59H11AR.4	hypothetical protein
	18532945	8.12	7.02	2.15	4.95e-05	0.0006	fan-1	Fanconi Anemia-associated Nuclease
	18559881	10.37	9.25	2.17	4.96e-05	0.0006	Y67H2A.10	hypothetical protein
	18510814	9.16	7.92	2.37	4.98e-05	0.0006	F10E9.3	hypothetical protein
	18477129	7.51	8.53	-2.03	5e-05	0.0006	aex-6	hypothetical protein
	18536934	3.79	4.87	-2.11	5.02e-05	0.0006	F19C7.4	hypothetical protein
	18542668	7.34	8.37	-2.05	5.05e-05	0.0006	T26C12.7	ncRNA
	18501848	4.93	7.36	-5.39	5.06e-05	0.0006	R05G9R.1	hypothetical protein
	18466050	8.27	9.98	-3.27	5.07e-05	0.0006	noah-1	NOmpA Homolog (Drosophila nompA: no mechanoreceptor potential A)
	18552583	9.1	10.12	-2.03	5.07e-05	0.0006	ifo-1	Intermediate Filament Organize
	18602644	3.96	5.19	-2.35	5.14e-05	0.0006	jud-4	hypothetical protein
	18605288	9.41	10.56	-2.22	5.14e-05	0.0006	C34E11.15	ncRNA
	18487577	8.44	7.34	2.14	5.18e-05	0.0006	psf-1	Probable DNA replication complex GINS protein PSF1
	18482935	6.15	7.2	-2.07	5.21e-05	0.0006	F26C11.1	Putative acid phosphatase F26C11.1
	18558452	9.33	8.25	2.11	5.23e-05	0.0006	Y42H9B.3	hypothetical protein
	18596403	7.91	9.01	-2.14	5.23e-05	0.0006	T16G1.9	hypothetical protein
	18502945	8.08	6.99	2.13	5.24e-05	0.0006	T07D4.5	hypothetical protein
	18484287	8.13	9.59	-2.74	5.29e-05	0.0006
	18516460	8.22	7.13	2.12	5.34e-05	0.0006	sas-1	hypothetical protein
	18545074	7.56	8.95	-2.61	5.36e-05	0.0006	samt-1	SAM (S-Adenosyl Methionine) Transporter
	18569871	5.11	6.16	-2.08	5.36e-05	0.0006	F41F3.8	hypothetical protein
	18522410	10	8.55	2.73	5.38e-05	0.0006	C44B9.3	hypothetical protein
	18576999	9.83	11.22	-2.61	5.4e-05	0.0006	hsp-16.48; hsp-16.49	Heat shock protein Hsp-16.48/Hsp-16.49
	18597334	9.83	11.22	-2.61	5.4e-05	0.0006
	18590753	4.71	5.83	-2.17	5.45e-05	0.0007	hsp-17	Heat Shock Protein
	18601746	7.31	6.07	2.35	5.46e-05	0.0007	ZK1037.6	hypothetical protein
	18600228	5.16	4.07	2.14	5.46e-05	0.0007	Y57E12B.10	hypothetical protein
	18623228	6.82	7.92	-2.13	5.56e-05	0.0007	F10D7.2	hypothetical protein
	18548952	5.48	6.72	-2.35	5.57e-05	0.0007	C17H12.6	hypothetical protein
	18558894	4.58	5.77	-2.28	5.64e-05	0.0007	lad-2	L1 CAM ADhesion molecule homolog
	18591009	7.45	5.44	4.02	5.66e-05	0.0007	F53F8.3	hypothetical protein
	18605784	4.47	5.77	-2.46	5.67e-05	0.0007	lact-7	beta-LACTamase domain containing
	18551434	5.02	6.67	-3.14	5.67e-05	0.0007	col-110	COLlagen
	18616248	7.06	9.51	-5.46	5.69e-05	0.0007	bus-8	hypothetical protein
	18576575	5.46	6.95	-2.81	5.73e-05	0.0007	wago-10	Piwi-like protein
	18618641	7.88	5.29	6	5.75e-05	0.0007	B0416.7	hypothetical protein
	18473813	5.87	7.02	-2.22	5.82e-05	0.0007	W01A8.6	hypothetical protein
	18487861	7.56	6.27	2.43	5.93e-05	0.0007	T05A7.1	hypothetical protein
	18470715	6.93	8.97	-4.1	5.95e-05	0.0007	ptr-11	PaTched Related family
	18550805	6.36	7.55	-2.28	6e-05	0.0007	ech-8	Enoyl-CoA Hydratase
	18607229	9.05	7.26	3.47	6.02e-05	0.0007	F02E8.4	hypothetical protein
	18564164	6.26	7.45	-2.29	6.02e-05	0.0007	oac-6	O-ACyltransferase homolog
	18590303	6.64	5.52	2.18	6.02e-05	0.0007	F46B6.4	hypothetical protein
	18493753	7.12	6.04	2.11	6.22e-05	0.0007	hda-2	Putative histone deacetylase 2
	18618424	6.59	5.4	2.28	6.26e-05	0.0007	crn-4	Cell death-related nuclease 4
	18517840	10.12	8.85	2.41	6.27e-05	0.0007	pie-1	Pharynx and intestine in excess protein 1
	18592512	3.92	5.18	-2.4	6.27e-05	0.0007	K02E2.8	hypothetical protein
	18598890	5.36	7.36	-4	6.27e-05	0.0007	Y32G9B.1	hypothetical protein
	18580703	5.23	7.37	-4.42	6.27e-05	0.0007	cyn-17	CYclophyliN
	18513977	8.71	7.62	2.13	6.28e-05	0.0007	K11H3.8	hypothetical protein
	18497767	11.7	10.37	2.52	6.34e-05	0.0007	F18A1.7	hypothetical protein
	18634282	9.67	10.73	-2.08	6.34e-05	0.0007	ZK899.2	hypothetical protein
	18475973	8.23	7.07	2.23	6.35e-05	0.0007
	18520293	10.44	9.39	2.07	6.36e-05	0.0007	lgg-3	Ubiquitin-like protein ATG12
	18555257	4.13	5.76	-3.11	6.41e-05	0.0007	R102.11	hypothetical protein
	18621718	6.18	4.92	2.4	6.45e-05	0.0007	C44C1.6	hypothetical protein
	18464249	6.15	7.27	-2.17	6.48e-05	0.0007	spe-4	Presenilin spe-4
	18542134	6.27	4.87	2.63	6.48e-05	0.0007	T12B3.2	hypothetical protein
	18509354	4.16	6.21	-4.13	6.48e-05	0.0007	C28H8.5	hypothetical protein
	18473486	6.01	4.79	2.34	6.49e-05	0.0007
	18605366	7.08	8.18	-2.15	6.53e-05	0.0007	idh-2	Isocitrate dehydrogenase [NADP]
	18509779	4.07	5.18	-2.16	6.56e-05	0.0007	cyp-25A1	CYtochrome P450 family
	18519364	6.38	5.35	2.04	6.59e-05	0.0007	ZK1058.3	Probable galactose-1-phosphate uridylyltransferase
	18601002	5.3	6.97	-3.19	6.6e-05	0.0007	Y75B7AR.1	hypothetical protein
	18523887	7.31	8.38	-2.1	6.69e-05	0.0008	nlp-10	Neuropeptide-Like Protein
	18526532	7.28	6.24	2.07	6.72e-05	0.0008	R10E4.11	hypothetical protein
	18600379	6.5	9.12	-6.17	6.75e-05	0.0008	lon-8	LONg
	18530012	7.08	5.87	2.31	6.77e-05	0.0008	Y54F10AM.11	hypothetical protein
	18632480	9.11	10.3	-2.28	6.79e-05	0.0008	acdh-7	Acyl CoA DeHydrogenase
	18536517	5.22	7.65	-5.4	6.88e-05	0.0008	nas-14	Zinc metalloproteinase nas-14
	18627869	3.97	5.38	-2.65	6.92e-05	0.0008	F57G12.2	hypothetical protein
	18515354	10.17	8.96	2.32	6.94e-05	0.0008	ttr-15	Transthyretin-like protein 15
	18491133	5.57	7.94	-5.19	6.97e-05	0.0008	Y53F4B.27	hypothetical protein
	18539287	5.18	6.22	-2.06	6.99e-05	0.0008	elo-7	Elongation of very long chain fatty acids protein
	18599926	4.93	7.3	-5.17	7.09e-05	0.0008	grl-5	GRound-Like (grd related)
	18597640	8.44	7.33	2.17	7.15e-05	0.0008	W02F12.4	hypothetical protein
	18589917	4.77	3.69	2.11	7.21e-05	0.0008	F41E6.15	hypothetical protein
	18500789	8.32	6.9	2.67	7.25e-05	0.0008	gei-14	GEX Interacting protein
	18463828	9.24	8.14	2.15	7.3e-05	0.0008	san-1	hypothetical protein
	18464655	5.46	6.54	-2.11	7.34e-05	0.0008	B0207.7	hypothetical protein
	18583840	5.63	4.33	2.46	7.34e-05	0.0008	C17E7.9	hypothetical protein
	18507003	6.36	7.9	-2.92	7.51e-05	0.0008	wrt-10	WaRThog (hedgehog-like family)
	18485353	7.69	6.52	2.26	7.56e-05	0.0008	pot-2	Protection Of Telomeres 1 (Pot1) homolog
	18605934	6.85	8.33	-2.78	7.57e-05	0.0008	trpp-12	TRansport Protein Particle
	18572738	7.8	9.31	-2.84	7.61e-05	0.0008	K07C11.4	Carboxylic ester hydrolase
	18488608	5.24	6.5	-2.4	7.62e-05	0.0008	tsp-10	TetraSPanin family
	18534782	6.52	7.77	-2.39	7.62e-05	0.0008	C34H4.1	hypothetical protein
	18570638	4.39	5.86	-2.76	7.65e-05	0.0008	F52F10.2	hypothetical protein
	18484617	5.24	6.5	-2.4	7.73e-05	0.0008	chs-2	CHitin Synthase
	18535524	5.08	6.21	-2.18	7.77e-05	0.0008	C49A9.5	hypothetical protein
	18534018	8.25	6.59	3.17	7.82e-05	0.0008	cht-3	Chitinase-like protein C25A8.4
	18491324	8.93	7.49	2.7	7.92e-05	0.0009	Y54G9A.5	hypothetical protein
	18615118	5.3	7.97	-6.36	7.92e-05	0.0009	nas-15	Zinc metalloproteinase nas-15
	18496737	6.75	5.19	2.97	7.99e-05	0.0009	EEED8.14	hypothetical protein
	18502123	3.76	5.21	-2.73	8.06e-05	0.0009	R12C12.10	hypothetical protein
	18612127	5.54	6.89	-2.54	8.1e-05	0.0009	cdh-9	CaDHerin family
	18577206	8.85	9.96	-2.15	8.18e-05	0.0009	T28H10.3	hypothetical protein
	18605222	6.48	7.54	-2.1	8.24e-05	0.0009	C33G3.4	Probable beta-mannosidase
	18609226	4.85	5.9	-2.07	8.31e-05	0.0009	F29G6.1	hypothetical protein
	18483380	4.78	6.09	-2.48	8.35e-05	0.0009	F33A8.10	hypothetical protein
	18453962	7.01	8.31	-2.46	8.35e-05	0.0009	F08A8.4	Acyl-coenzyme A oxidase
	18612286	4.59	6.58	-3.96	8.46e-05	0.0009	F59F5.7	hypothetical protein
	18599811	4.2	5.68	-2.8	8.49e-05	0.0009	hsp-16.2	Heat Shock Protein
	18599488	4.78	7.11	-5.02	8.64e-05	0.0009	lact-8	beta-LACTamase domain containing
	18506034	3.9	4.93	-2.04	8.67e-05	0.0009	Y53C12A.8	hypothetical protein
	18628474	10.85	8.17	6.4	8.67e-05	0.0009	meg-1	hypothetical protein
	18490770	5.26	6.75	-2.82	8.7e-05	0.0009	Y49F6B.15	ncRNA
	18529744	8.76	7.38	2.6	8.73e-05	0.0009	Y48A6B.7	hypothetical protein
	18626744	7.77	6.43	2.53	8.8e-05	0.0009	F48E3.4	hypothetical protein
	18513849	7.77	6.63	2.19	8.81e-05	0.0009	emb-1	hypothetical protein
	18612629	7.96	10.08	-4.36	8.82e-05	0.0009	H42K12.3	hypothetical protein
	18532652	10.72	9.27	2.74	8.9e-05	0.0009	B0513.4	hypothetical protein
	18479108	7.09	9.22	-4.39	8.91e-05	0.0009	bli-1	Cuticle collagen bli-1
	18526338	5.08	6.36	-2.42	8.94e-05	0.0009	R06B10.1	pseudo
	18492063	8.78	7.45	2.51	8.96e-05	0.0009	ZK1307.9	Coiled-coil domain-containing protein 130 homolog
	18620622	7.25	4.65	6.04	8.99e-05	0.0009	C27C12.3	hypothetical protein
	18463990	6.73	8.78	-4.16	9.02e-05	0.0009	ZK1025.2; ZK1025.8	hypothetical protein
	18477431	6.73	8.78	-4.16	9.02e-05	0.0009	ZK1025.2; ZK1025.8	hypothetical protein
	18580303	11.65	10.54	2.16	9.06e-05	0.0009	Y75B12B.1	hypothetical protein
	18476995	5.3	6.53	-2.35	9.09e-05	0.0009	Y71G12B.33	hypothetical protein
	18504737	7.71	9.37	-3.16	9.09e-05	0.0009	ptc-3	PaTChed family
	18463671	7.65	8.83	-2.26	9.19e-05	0.001	Y95B8A.2	hypothetical protein
	18613139	8.07	6.81	2.4	9.35e-05	0.001	K08B5.1	hypothetical protein
	18595988	8.59	6.92	3.18	9.41e-05	0.001	T10C6.7	hypothetical protein
	18506068	5.04	3.85	2.29	9.43e-05	0.001	Y53C12B.7	hypothetical protein
	18559040	5.45	7.84	-5.23	9.5e-05	0.001	Y55F3AM.14	hypothetical protein
	18589579	6.81	8.46	-3.12	9.78e-05	0.001	F36H9.5	hypothetical protein
	18468332	8.94	7.57	2.58	9.81e-05	0.001	maph-1.2	Microtubule-Associated Protein Homolog
	18546937	5.85	4.76	2.12	9.84e-05	0.001	ZC168.2	hypothetical protein
	18630092	5.72	4.64	2.11	9.89e-05	0.001	R04D3.4	hypothetical protein
	18542208	5.84	7.01	-2.25	9.91e-05	0.001	T13A10.1	hypothetical protein
	18619226	6.31	8.09	-3.43	9.94e-05	0.001	C05E7.1	hypothetical protein
	18514293	8.46	7.3	2.24	9.96e-05	0.001	R02F2.4	hypothetical protein
	18468095	9.92	8.74	2.27	9.96e-05	0.001	F20G4.2	hypothetical protein
	18510167	5.56	6.67	-2.15	9.97e-05	0.001	C45G9.6	hypothetical protein
	18555288	5.31	4.1	2.31	0.0001	0.001	R102.6	hypothetical protein
	18567665	9.45	8.3	2.22	0.0001	0.001	F21C10.10	hypothetical protein
	18483658	6.04	4.98	2.1	0.0001	0.001	F35H8.2	hypothetical protein
	18543288	4.41	6.41	-4	0.0001	0.001	pqn-79; pqn-76; abu-5; pqn-78	Prion-like-(Q/N-rich)-domain-bearing protein; Activated in Blocked Unfolded protein response
	18500134	4.73	5.81	-2.11	0.0001	0.001	F54D5.15	hypothetical protein
	18566485	7.32	6.13	2.28	0.0001	0.001	F08H9.14	ncRNA
	18497783	9.18	7.66	2.86	0.0001	0.001	puf-6	Pumilio domain-containing protein 6
	18546377	9.72	8.7	2.02	0.0001	0.001	puf-11	PUF (Pumilio/FBF) domain-containing
	18540462	4.21	5.26	-2.06	0.0001	0.001	K08D12.8	hypothetical protein
	18575315	7.11	8.49	-2.6	0.0001	0.001	bus-19	hypothetical protein
	18476096	5.27	6.27	-2	0.0001	0.001	grh-1	GRainyHead (Drosophila transcription factor) homolog
	18468364	9.14	7.64	2.84	0.0001	0.001	glc-2	Glutamate-gated chloride channel subunit beta
	18497062	5.25	6.28	-2.04	0.0001	0.001	pho-13	intestinal acid PHOsphatase
	18594770	9.52	7.86	3.16	0.0001	0.001	T01C3.3	hypothetical protein
	18510133	5.65	6.79	-2.21	0.0001	0.001	C45G9.13	hypothetical protein
	18522247	8.34	7.27	2.1	0.0001	0.001	brc-1	BRCa homolog (tumor suppressor gene Brca1)
	18613652	7.59	8.85	-2.38	0.0001	0.0011	clec-265	C-type LECtin
	18616740	5.96	7.15	-2.28	0.0001	0.0011	lpr-6	LiPocalin-Related protein
	18555537	4.89	6.72	-3.54	0.0001	0.0011	ant-1.4	Adenine Nucleotide Translocator
	18507947	5.34	6.55	-2.31	0.0001	0.0011	anmt-1	Uncharacterized methyltransferase B0303.2
	18537097	11.1	9.85	2.38	0.0001	0.0011	gfat-2	Glutamine-Fructose 6-phosphate AminoTransferase homolog
	18545942	7.69	6.6	2.13	0.0001	0.0011	Y67D8C.3	hypothetical protein
	18626025	5.8	7.21	-2.66	0.0001	0.0011	F44A6.5	hypothetical protein
	18535394	4.64	7.35	-6.52	0.0001	0.0011	mam-2	MAM (Meprin, A5-protein, PTPmu) domain protein
	18473990	7.37	6.03	2.54	0.0001	0.0011	W02D9.6	hypothetical protein
	18608371	7.48	6.47	2.01	0.0001	0.0011	F16B12.6	hypothetical protein
	18606538	6.86	5.49	2.58	0.0001	0.0011	C53B7.3	hypothetical protein
	18536283	7.35	6.23	2.17	0.0001	0.0011
	18627970	10.41	11.73	-2.5	0.0001	0.0011	vit-3	Vitellogenin-3
	18634403	3.92	5.39	-2.76	0.0001	0.0011
	18509210	8.17	7.13	2.06	0.0001	0.0011	flh-2	FLYWCH zinc finger transcription factor homolog
	18553578	9.95	8.57	2.61	0.0001	0.0011	H02I12.5	hypothetical protein
	18481392	7.61	6.53	2.12	0.0001	0.0011	parp-2	Poly(ADP-ribose) polymerase pme-2
	18615377	8.41	6.82	3.01	0.0001	0.0011	ttr-30	TransThyretin-Related family domain
	18614518	5.17	3.63	2.9	0.0001	0.0011	R09A8.1	hypothetical protein
	18511011	6.84	8.23	-2.62	0.0001	0.0011	col-89	COLlagen
	18522274	6.63	7.89	-2.39	0.0001	0.0011	glb-11	GLoBin related
	18526666	7.49	5.84	3.13	0.0001	0.0011	ttr-8	TransThyretin-Related family domain
	18530620	5.68	7.4	-3.31	0.0001	0.0012	Y71H2AM.15	hypothetical protein
	18561770	5.66	6.89	-2.36	0.0001	0.0012	B0507.1	hypothetical protein
	18469519	4.87	6.24	-2.58	0.0001	0.0012	F36H2.5	hypothetical protein
	18578395	4.32	5.64	-2.5	0.0001	0.0012	Y32B12C.1	hypothetical protein
	18635179	9.15	8.06	2.13	0.0001	0.0012
	18632339	4.5	6.39	-3.7	0.0001	0.0012	T24C12.4	hypothetical protein
	18520160	13.29	12.18	2.15	0.0001	0.0012	cpg-2	Chondroitin proteoglycan-2
	18510852	4.88	6.53	-3.13	0.0001	0.0012	lips-3	LIPaSe related
	18479096	5.42	7.93	-5.68	0.0001	0.0012	col-79	Putative cuticle collagen 79
	18465099	6.6	5.39	2.32	0.0001	0.0012	C06A5.12	hypothetical protein
	18477439	5.66	8.2	-5.8	0.0001	0.0012	ZK1025.3	hypothetical protein
	18565146	10.03	9.02	2.01	0.0001	0.0012	bir-2	BIR (baculovirus inhibitory repeat) family
	18475867	7.23	8.38	-2.21	0.0001	0.0012	Y47H10A.5	hypothetical protein
	18522471	7.3	4.92	5.2	0.0001	0.0012	C45G9.12	hypothetical protein
	18499829	5.23	4.09	2.2	0.0001	0.0012	bath-4	BTB and MATH domain containing
	18518646	6.02	7.04	-2.02	0.0001	0.0012	cdh-12	CaDHerin family
	18470777	4.4	5.56	-2.23	0.0001	0.0012	F56G4.7	hypothetical protein
	18509753	8.3	7.23	2.11	0.0001	0.0012	C35D10.7	hypothetical protein
	18621832	6.33	8.73	-5.29	0.0001	0.0012	ptr-4	PaTched Related family
	18498196	8.46	9.92	-2.75	0.0001	0.0012	F26G1.5	hypothetical protein
	18538726	8.19	9.71	-2.87	0.0001	0.0013	noah-2	NOmpA Homolog (Drosophila nompA: no mechanoreceptor potential A)
	18493095	4.33	6.15	-3.53	0.0001	0.0013	B0454.8	hypothetical protein
	18494465	7.73	6.39	2.53	0.0001	0.0013	fbxc-50	F-box C protein
	18500592	6.33	5.01	2.5	0.0001	0.0013	bath-19	BTB and MATH domain containing
	18616764	6.94	8.43	-2.82	0.0001	0.0013	lpr-4	LiPocalin-Related protein
	18543104	5.9	7.18	-2.44	0.0001	0.0013	W08E12.3	hypothetical protein
	18635379	8.4	7.27	2.2	0.0001	0.0013
	18562087	3.14	4.81	-3.17	0.0001	0.0013	abu-15	Activated in Blocked Unfolded protein response
	18508300	9.22	7.73	2.81	0.0001	0.0013	tyr-1	Putative tyrosinase-like protein tyr-1
	18534841	7.12	8.33	-2.32	0.0001	0.0013	C35B1.7	hypothetical protein
	18613693	6.51	7.78	-2.4	0.0001	0.0013	M03A8.3	hypothetical protein
	18535712	8.94	7.88	2.09	0.0001	0.0013	C49H3.6	hypothetical protein
	18505351	5.59	4.52	2.1	0.0001	0.0013	tig-3	TransformIng Growth factor beta family
	18508321	5.19	7.17	-3.95	0.0001	0.0013	acdh-6	Probable acyl-CoA dehydrogenase 6
	18522392	5.05	6.77	-3.3	0.0001	0.0013	elo-4	Putative fatty acid elongation protein 4
	18575914	9.68	7.35	5.03	0.0001	0.0013	col-143	COLlagen
	18505996	8.86	7.66	2.29	0.0001	0.0013	Y53C12A.11	hypothetical protein
	18564087	4.69	5.98	-2.45	0.0001	0.0013	srx-58	Serpentine Receptor, class X
	18499749	8.72	6.99	3.32	0.0001	0.0014	skpo-1	Peroxidase skpo-1
	18468885	9.66	8.65	2.02	0.0001	0.0014	F31C3.3	hypothetical protein
	18552159	6.91	9.08	-4.49	0.0002	0.0014	col-34	Cuticle collagen 34
	18598275	5.27	4.06	2.31	0.0002	0.0014	fbxa-206	F-box A protein
	18454869	5.63	4.04	3.01	0.0002	0.0014	F26E4.18	ncRNA
	18521356	8.88	7.62	2.39	0.0002	0.0014	C14B1.9	hypothetical protein
	18473498	8.17	7.05	2.17	0.0002	0.0014	sys-1	SYmmetrical Sister cell hermaphrodite gonad defect
	18554217	8.3	9.44	-2.19	0.0002	0.0014	K08D8.3	hypothetical protein
	18621535	6.03	4.78	2.38	0.0002	0.0014	C41G11.1	hypothetical protein
	18584927	7.14	5.21	3.81	0.0002	0.0014	nas-9	Zinc metalloproteinase nas-9
	18568737	5.22	3.98	2.37	0.0002	0.0014	F29G9.1	hypothetical protein
	18576126	3.85	5.26	-2.67	0.0002	0.0014	mam-4	MAM (Meprin, A5-protein, PTPmu) domain protein
	18514784	6.53	5.16	2.57	0.0002	0.0014	kbp-1	KNL (kinetochore null) Binding Protein
	18552080	7.14	8.97	-3.56	0.0002	0.0015	F33D4.6	hypothetical protein
	18454926	4.42	5.55	-2.18	0.0002	0.0015	uggt-2	UDP-Glucose Glycoprotein glucosylTransferase
	18494543	4.5	5.65	-2.22	0.0002	0.0015	C17G10.7	hypothetical protein
	18543660	8.42	7.15	2.42	0.0002	0.0015	cyp-31A3	CYtochrome P450 family
	18483156	5.21	7.1	-3.69	0.0002	0.0015	F28C6.5	hypothetical protein
	18611039	4.73	6.34	-3.06	0.0002	0.0015	F49E10.2	hypothetical protein
	18567159	9.56	8.51	2.07	0.0002	0.0015	inft-2	INverted Formin/formin Three-related
	18611252	9.41	10.73	-2.5	0.0002	0.0015	aagr-4	Acid Alpha Glucosidase Relate
	18530963	8.5	7.48	2.02	0.0002	0.0015	Y76A2B.4	hypothetical protein
	18524346	3.98	5.39	-2.66	0.0002	0.0015	bli-5	BLIstered cuticle
	18635721	7.51	6.48	2.04	0.0002	0.0015
	18536216	5.57	7.38	-3.51	0.0002	0.0015	F01G10.10	hypothetical protein
	18559748	4.29	5.57	-2.43	0.0002	0.0015	paqr-3	Progestin and AdipoQ Receptor family
	18570672	7.47	8.47	-2.01	0.0002	0.0015	F53C11.1	hypothetical protein
	18615148	7.83	6.55	2.42	0.0002	0.0016	T04G9.7	hypothetical protein
	18559643	7.55	8.58	-2.05	0.0002	0.0016	hum-8	Heavy chain, Unconventional Myosin
	18572151	2.5	4.52	-4.04	0.0002	0.0016	K01D12.8	hypothetical protein
	18549213	7.79	4.86	7.62	0.0002	0.0016	C27B7.9	hypothetical protein
	18565042	3.36	5.04	-3.21	0.0002	0.0016	C49G7.12	hypothetical protein
	18626196	4	5.03	-2.05	0.0002	0.0016	dpy-7	Cuticle collagen dpy-7
	18627946	4.93	6.56	-3.09	0.0002	0.0016	F59D12.2	hypothetical protein
	18589031	10.73	9.64	2.13	0.0002	0.0016	neg-1	Negative Effect on Gut development
	18616126	7.39	8.96	-2.97	0.0002	0.0016	T22B7.3	hypothetical protein
	18558758	7.24	8.31	-2.09	0.0002	0.0016	Y51H4A.7	Probable urocanate hydratase
	18562619	4.69	7.44	-6.71	0.0002	0.0017	irg-1	Infection Response Gene
	18627010	8.53	5.87	6.34	0.0002	0.0017	rgs-8.2; rgs-8.1	Regulator of G protein Signaling
	18633269	8.53	5.87	6.34	0.0002	0.0017	rgs-8.2; rgs-8.1	Regulator of G protein Signaling
	18474216	12.38	11.15	2.34	0.0002	0.0017	W05F2.3	hypothetical protein
	18464889	11.05	9.71	2.54	0.0002	0.0017	C01G8.1	hypothetical protein
	18466380	6.84	8.12	-2.43	0.0002	0.0017	C41G7.8	hypothetical protein
	18503640	3.98	5.43	-2.73	0.0002	0.0017	srh-70	Serpentine Receptor, class H
	18592594	6.73	5.7	2.04	0.0002	0.0017	K03B8.8	hypothetical protein
	18587826	5.94	6.96	-2.04	0.0002	0.0017	F20D6.11	hypothetical protein
	18633429	10.53	9.18	2.56	0.0002	0.0017	Y73B3A.1	hypothetical protein
	18474786	6.76	5.71	2.06	0.0002	0.0018	Y106G6D.5; Y106G6D.6	hypothetical protein
	18597309	4.92	5.93	-2.02	0.0002	0.0018	oac-50	O-ACyltransferase homolog
	18617799	7.27	5.61	3.16	0.0002	0.0018	rgs-9	Regulator of G-protein signaling rgs-9
	18487591	5.2	6.79	-3	0.0002	0.0018	T01B7.13	hypothetical protein
	18600143	6.88	5.4	2.78	0.0002	0.0018	ttr-26	TransThyretin-Related family domain
	18608063	8.41	6.93	2.78	0.0002	0.0018	pes-23	Patterned Expression Site
	18463737	5.74	7.69	-3.86	0.0002	0.0018	ZC123.1	hypothetical protein
	18616755	6.65	8.24	-3.01	0.0002	0.0018	lpr-5	LiPocalin-Related protein
	18563794	7.31	8.41	-2.14	0.0002	0.0018	C25F9.14	hypothetical protein
	18538940	9.07	7.06	4.02	0.0002	0.0018	F55B11.3	hypothetical protein
	18566497	6.13	7.16	-2.04	0.0002	0.0018	clec-57	C-type LECtin
	18495707	5.86	7	-2.2	0.0002	0.0018	ptr-3	PaTched Related family
	18599334	4.8	6.27	-2.77	0.0002	0.0018	Y39H10A.4	hypothetical protein
	18557545	3.36	5.11	-3.36	0.0002	0.0019	Y11D7A.5	hypothetical protein
	18465496	9.16	7.96	2.3	0.0002	0.0019	C18E3.9	hypothetical protein
	18525988	7.27	8.33	-2.08	0.0002	0.0019	hmit-1.3	H(+) MyoInositol coTransporter
	18608586	9.1	7.43	3.19	0.0002	0.0019	F18E9.3	hypothetical protein
	18619451	4.31	6.35	-4.13	0.0002	0.0019	C09B8.4	hypothetical protein
	18584016	5.75	7.87	-4.36	0.0002	0.0019	ptr-1	PaTched Related family
	18561144	4.46	6.62	-4.47	0.0002	0.0019	lips-6	LIPaSe related
	18551861	7.22	9.17	-3.86	0.0002	0.002	acs-20	fatty Acid CoA Synthetase family
	18567115	3.92	5.58	-3.17	0.0002	0.002	cyp-35D1	CYtochrome P450 family
	18539317	4.23	5.33	-2.15	0.0002	0.002	ora-1	Onchocerca Related Antigen family
	18534447	6.99	8.07	-2.11	0.0002	0.002	nhr-43	Nuclear Hormone Receptor family
	18491120	5.02	6.79	-3.41	0.0002	0.002	Y53F4B.25	hypothetical protein
	18547648	3.75	5.08	-2.51	0.0002	0.002	nas-6	Metalloendopeptidase
	18629895	4.09	5.52	-2.7	0.0003	0.002	R03E9.2	hypothetical protein
	18609861	5.31	6.81	-2.83	0.0003	0.002	F39D8.3	hypothetical protein
	18608896	7.72	9.2	-2.79	0.0003	0.002	ttr-35	TransThyretin-Related family domain
	18567885	5.12	6.26	-2.2	0.0003	0.002	F23B12.1	Serine/threonine-protein phosphatase
	18487907	6.13	8.03	-3.74	0.0003	0.0021	qua-1	QUAhog (hedgehog related)
	18491660	4.65	6.61	-3.89	0.0003	0.0021	hhat-1	Homolog of Hedgehog AcylTransferase
	18512081	4.52	6.09	-2.98	0.0003	0.0021	nas-1	Zinc metalloproteinase nas-1
	18503098	4.48	3.46	2.02	0.0003	0.0021	cyp-13A5	Putative cytochrome P450 CYP13A5
	18597274	4.78	6.19	-2.65	0.0003	0.0021	hpo-36	hypothetical protein
	18516118	7.67	6.64	2.04	0.0003	0.0021	VB0393L.2; B0393.8	hypothetical protein
	18520406	7.67	6.64	2.04	0.0003	0.0021	VB0393L.2; B0393.8	hypothetical protein
	18604391	4.55	5.59	-2.07	0.0003	0.0021	C23H4.2	Carboxylic ester hydrolase
	18622471	7.99	8.99	-2	0.0003	0.0021	gcsh-1	Glycine Cleavage System H protein
	18507167	4	5.01	-2.01	0.0003	0.0021	ZK250.13; math-47	hypothetical protein; pseudo
	18606909	6.62	5.44	2.26	0.0003	0.0021	utx-1	human UTX (Ubiquitously transcribed TPR on X) homolog
	18495729	7.18	5.82	2.56	0.0003	0.0021	C41H7.9	hypothetical protein
	18500537	8.45	10.62	-4.48	0.0003	0.0021	bli-2	BLIstered cuticle
	18589301	3.72	4.78	-2.09	0.0003	0.0021	F35E12.9	hypothetical protein
	18621379	11.98	10.78	2.3	0.0003	0.0021	C39D10.7	hypothetical protein
	18600465	6.85	8.03	-2.27	0.0003	0.0021	Y5H2A.5	ncRNA
	18482276	7.85	6.6	2.37	0.0003	0.0021	bath-27	BTB and MATH domain containing
	18456706	6.12	7.52	-2.65	0.0003	0.0021	F55D12.2	hypothetical protein
	18507766	4.71	3.67	2.07	0.0003	0.0021	B0244.7	Putative G-protein coupled receptor B0244.7
	18544737	6.69	5.37	2.49	0.0003	0.0021	clec-71	C-type LECtin
	18499093	7.2	5.91	2.45	0.0003	0.0022	F41G3.10	hypothetical protein
	18453942	6.18	7.66	-2.78	0.0003	0.0022	acox-2	Acyl-coenzyme A oxidase
	18451589	7.37	8.82	-2.73	0.0003	0.0022	ugt-25	UDP-glucuronosyltransferase
	18625884	5.27	6.58	-2.48	0.0003	0.0022	nspc-9	Nematode Specific Peptide family, group C
	18501027	8.7	7.34	2.56	0.0003	0.0022	ptr-13	PaTched Related family
	18538164	4.26	5.73	-2.76	0.0003	0.0022	cutl-28	CUTiclin-Like
	18532922	7.45	6.16	2.45	0.0003	0.0023	C01G5.5	hypothetical protein
	18612750	5.99	7.2	-2.31	0.0003	0.0023	K02E10.4	hypothetical protein
	18617093	6.23	8.03	-3.49	0.0003	0.0023	Y34B4A.10	hypothetical protein
	18549353	5.44	6.52	-2.11	0.0003	0.0023	tag-141	hypothetical protein
	18624551	5.58	4.28	2.47	0.0003	0.0023	F23D12.2	hypothetical protein
	18498201	4.87	6.02	-2.22	0.0003	0.0023	nep-12	NEPrilysin metallopeptidase family
	18505216	6.41	5.26	2.22	0.0003	0.0023	Y39G8B.2	hypothetical protein
	18576993	9.96	11.11	-2.22	0.0003	0.0023	hsp-16.1; hsp-16.11	Heat shock protein Hsp-16.1/Hsp-16.11
	18471757	5.69	7.54	-3.61	0.0003	0.0023	K10D3.4	hypothetical protein
	18635633	8.73	7.73	2	0.0003	0.0023
	18521969	7.77	6.64	2.2	0.0003	0.0023	C29E4.13	hypothetical protein
	18628595	9.22	7.77	2.73	0.0003	0.0023	aqp-8	AQuaPorin or aquaglyceroporin related
	18540873	6.99	5.92	2.09	0.0003	0.0023	M18.3	hypothetical protein
	18618252	7.74	5.14	6.07	0.0003	0.0023	ZK813.2	hypothetical protein
	18632903	4.36	6.27	-3.75	0.0003	0.0024	hog-1	HOG only (Hedgehog Hog domain alone)
	18613794	9.02	10.16	-2.21	0.0003	0.0024	M163.15	ncRNA
	18626720	5.88	4.74	2.2	0.0003	0.0024	F48E3.2	hypothetical protein
	18527529	8.43	9.43	-2	0.0003	0.0024	fbxa-59	F-box A protein
	18536321	3.75	4.82	-2.09	0.0003	0.0024	F07C6.2	hypothetical protein
	18551928	7.1	8.79	-3.23	0.0003	0.0024	col-111	COLlagen
	18541971	5.68	6.7	-2.03	0.0003	0.0024	T08B6.9	hypothetical protein
	18580503	6.18	4.78	2.64	0.0003	0.0024	ZC116.1	hypothetical protein
	18523034	7.86	6.81	2.08	0.0003	0.0024	F08F8.4	hypothetical protein
	18532291	11.41	10.36	2.07	0.0003	0.0024	upp-1	Uridine PhosPhorylase
	18606503	7.03	8.19	-2.23	0.0003	0.0024	C52G5.2	hypothetical protein
	18524622	8.81	7.75	2.08	0.0003	0.0024	ska-3	Spindle and Kinetochore-Associated protein homolog
	18457355	6.26	7.34	-2.13	0.0003	0.0024	dhhc-12	Palmitoyltransferase
	18629126	4.88	6.07	-2.29	0.0003	0.0025	K09C8.7	hypothetical protein
	18604541	4.97	6.1	-2.18	0.0003	0.0025	C24H10.1	hypothetical protein
	18474025	6.71	4.98	3.32	0.0003	0.0025	W03F11.1	hypothetical protein
	18555942	6.11	7.29	-2.26	0.0003	0.0025	T11B7.2	hypothetical protein
	18615941	5.67	7.44	-3.42	0.0003	0.0025	lpr-7	LiPocalin-Related protein
	18487151	4.4	5.62	-2.34	0.0003	0.0025	cdh-7	CaDHerin family
	18608737	7.34	6.09	2.38	0.0003	0.0025	F19H6.4	hypothetical protein
	18490715	4.41	5.51	-2.13	0.0003	0.0025	Y48E1B.8	hypothetical protein
	18592476	3.92	5.44	-2.87	0.0003	0.0025	K02E11.11	hypothetical protein
	18571572	6.9	5.79	2.17	0.0003	0.0025	sta-2	Signal transducer and activator of transcription b
	18551181	3.85	5.18	-2.52	0.0003	0.0025	F13B12.4	Putative pyridoxal-phosphate dependent protein F13B12.4
	18605862	6.23	7.3	-2.11	0.0003	0.0026	C42D8.1	hypothetical protein
	18544500	8.83	7.8	2.04	0.0003	0.0026	Y43D4A.3; Y43D4A.4	hypothetical protein
	18617500	6.86	5.81	2.08	0.0003	0.0026	Y73B3A.20	hypothetical protein
	18517546	4.76	6.34	-2.98	0.0004	0.0026	Y47D3B.1	hypothetical protein
	18576462	5.67	7.64	-3.92	0.0004	0.0026	ptr-16	PaTched Related family
	18535134	10.77	9.49	2.42	0.0004	0.0026	perm-2	PERMeable eggshell
	18598952	5.21	7.39	-4.54	0.0004	0.0026	Y38A10A.2	hypothetical protein
	18574614	4.46	3.46	2.01	0.0004	0.0027	T01G5.7	hypothetical protein
	18567270	11.42	10.41	2.01	0.0004	0.0027	F16B4.4	hypothetical protein
	18488327	9.59	8.1	2.8	0.0004	0.0027	gpd-1	Glyceraldehyde-3-phosphate dehydrogenase 1
	18544452	10.28	9.17	2.16	0.0004	0.0027	Y43B11AR.1	hypothetical protein
	18462829	5.8	6.93	-2.19	0.0004	0.0027	Y65B4A.2	hypothetical protein
	18557552	4.31	6.53	-4.67	0.0004	0.0027	Y11D7A.9	hypothetical protein
	18615016	5.03	6.62	-3.01	0.0004	0.0027	T03G6.1	hypothetical protein
	18540327	6.33	7.64	-2.49	0.0004	0.0027	fmo-1	Dimethylaniline monooxygenase [N-oxide-forming]
	18597331	10.43	11.7	-2.41	0.0004	0.0027	hsp-16.1; hsp-16.11	Heat shock protein Hsp-16.1/Hsp-16.11
	18542800	5.92	4.53	2.62	0.0004	0.0028	pes-1	Patterned Expression Site
	18550815	6.05	4.79	2.4	0.0004	0.0028	ech-9	Enoyl-CoA Hydratase
	18488490	5.44	6.67	-2.34	0.0004	0.0029	T13C2.3	hypothetical protein
	18461813	6.35	7.35	-2.01	0.0004	0.0029	ugt-31	UDP-GlucuronosylTransferase
	18586350	5.04	6.52	-2.8	0.0004	0.0029	fut-2	FUcosyl Transferase
	18480672	4.47	5.57	-2.15	0.0004	0.0029	math-24	MATH (meprin-associated Traf homology) domain containing
	18635645	4.94	3.82	2.16	0.0004	0.0029
	18619825	10.45	8.81	3.13	0.0004	0.0029	hsp-43	Heat Shock Protein
	18628613	4.76	5.82	-2.08	0.0004	0.003	K03A1.4	hypothetical protein
	18546659	4.32	6.2	-3.69	0.0004	0.003	pqn-91	Prion-like-(Q/N-rich)-domain-bearing protein
	18561519	6.52	4.28	4.71	0.0004	0.003	nlp-28	GMYGGW-amide
	18515027	5.27	6.57	-2.46	0.0004	0.003	R74.2	hypothetical protein
	18598426	4.95	6.57	-3.09	0.0004	0.003	Y113G7B.12	hypothetical protein
	18480659	4.7	6	-2.46	0.0004	0.0031	math-22	MATH (meprin-associated Traf homology) domain containing
	18536786	6.93	4.91	4.05	0.0004	0.0031
	18628217	9.36	7.97	2.63	0.0004	0.0031	tbh-1	Tyramine Beta Hydroxylase
	18595810	8.99	10	-2.01	0.0005	0.0032	mtl-2	Metallothionein-2
	18630409	5.19	7.1	-3.73	0.0005	0.0032	col-182	COLlagen
	18584527	7.16	5.75	2.67	0.0005	0.0032	C31B8.8	hypothetical protein
	18546727	6.29	7.65	-2.57	0.0005	0.0032	Y77E11A.14	hypothetical protein
	18634387	3.95	5.35	-2.65	0.0005	0.0032
	18505912	7.9	6.49	2.65	0.0005	0.0032	Y51H7C.15	hypothetical protein
	18621723	2.8	3.84	-2.06	0.0005	0.0032	col-180	COLlagen
	18539435	4.71	5.82	-2.16	0.0005	0.0033	F58F9.3	hypothetical protein
	18503598	6.55	8.06	-2.85	0.0005	0.0033	cutl-15	CUTiclin-Like
	18621726	4.92	6.41	-2.8	0.0005	0.0033	C44C10.11	hypothetical protein
	18495724	4.89	5.96	-2.1	0.0005	0.0034	clec-3	C-type LECtin
	18565979	7.91	6.36	2.93	0.0005	0.0034	D1086.6	hypothetical protein
	18454859	6.27	7.28	-2.02	0.0005	0.0034	gpx-1	Glutathione peroxidase 1
	18456907	5.92	6.93	-2.01	0.0005	0.0034	F56C11.6	Carboxylic ester hydrolase
	18536274	5.64	4.3	2.52	0.0005	0.0034	F02H6.3	hypothetical protein
	18543022	9.07	7.38	3.21	0.0005	0.0034	grd-3	GRounDhog (hedgehog-like family)
	18485826	6.66	7.9	-2.35	0.0005	0.0034	H41C03.3	hypothetical protein
	18590572	4.81	5.88	-2.1	0.0005	0.0034	cutl-18	CUTiclin-Like
	18556612	8.5	6.87	3.09	0.0005	0.0035	T25B9.1	hypothetical protein
	18505345	5.71	6.79	-2.11	0.0005	0.0035	Y46D2A.2	hypothetical protein
	18612829	4.51	3.45	2.09	0.0005	0.0035	K03A11.1	hypothetical protein
	18623059	7.25	8.96	-3.28	0.0005	0.0035	mlt-9	hypothetical protein
	18576074	6.27	7.42	-2.22	0.0005	0.0035	cyp-29A2	CYtochrome P450 family
	18553123	9.81	8.63	2.26	0.0005	0.0036	F55B11.2	hypothetical protein
	18617330	5.36	6.56	-2.29	0.0005	0.0036	Y62H9A.12	hypothetical protein
	18556361	7.6	6.45	2.23	0.0005	0.0036	T19E7.6	hypothetical protein
	18591323	6.3	7.54	-2.36	0.0005	0.0036	F56A4.13	ncRNA
	18494921	4.69	6.21	-2.86	0.0005	0.0036	C27A2.12	hypothetical protein
	18589802	6.09	7.5	-2.65	0.0005	0.0036	F40F9.5	hypothetical protein
	18584457	4.77	6.22	-2.72	0.0005	0.0036	clec-230	C-type LECtin
	18634361	4.06	5.29	-2.35	0.0005	0.0037
	18635453	9.05	10.1	-2.07	0.0005	0.0037
	18532764	7.96	9.31	-2.55	0.0006	0.0037	C01B10.11	hypothetical protein
	18632566	8.05	9.14	-2.14	0.0006	0.0037	T27A10.6	hypothetical protein
	18511984	5.65	7.35	-3.25	0.0006	0.0037	F43C1.5	hypothetical protein
	18622208	6.96	5.93	2.05	0.0006	0.0038	sul-3	SULfatase domain protein
	18584517	5.01	6.12	-2.16	0.0006	0.0038	C31B8.7	hypothetical protein
	18483812	4.5	5.73	-2.34	0.0006	0.0038
	18602331	5.25	6.78	-2.9	0.0006	0.0038	mboa-1	O-acyltransferase
	18566300	3.8	5.22	-2.68	0.0006	0.0038	ptd-2	disPaTcheD family
	18463981	3.67	5.13	-2.75	0.0006	0.0038	bah-1	Biofilm Absent on Head (after Yersinia exposure)
	18589662	5.36	6.5	-2.21	0.0006	0.0039	F38A6.4	hypothetical protein
	18599247	10.04	9.02	2.03	0.0006	0.0039	Y39B6A.42	hypothetical protein
	18563438	6.33	4.98	2.56	0.0006	0.0039	C17E7.4	hypothetical protein
	18625316	5.1	6.21	-2.17	0.0006	0.004	F38B2.6	hypothetical protein
	18569326	6.67	5.25	2.66	0.0006	0.0041	F36G9.3	hypothetical protein
	18583272	5.29	7.04	-3.38	0.0006	0.0041	C13C12.2	hypothetical protein
	18477914	5.72	4.58	2.21	0.0006	0.0042	B0228.1	hypothetical protein
	18474429	4.52	5.57	-2.07	0.0006	0.0042	W10C8.3	hypothetical protein
	18552719	7.5	5.53	3.91	0.0006	0.0042	F45E4.5	hypothetical protein
	18627064	5.55	7.18	-3.09	0.0006	0.0042	wrt-2	WaRThog (hedgehog-like family)
	18483715	6.18	7.37	-2.29	0.0006	0.0042	F36H5.14	hypothetical protein
	18535480	6.98	8.25	-2.42	0.0006	0.0042	C49A9.2	hypothetical protein
	18589038	9.2	7.92	2.42	0.0007	0.0042	F32D1.7	hypothetical protein
	18465269	5.54	6.8	-2.39	0.0007	0.0043	hsp-70	Heat Shock Protein
	18485357	8.14	6.36	3.45	0.0007	0.0043	F57C2.4	hypothetical protein
	18614267	5.98	7.75	-3.42	0.0007	0.0043	R07B1.13	hypothetical protein
	18631698	4.39	5.76	-2.59	0.0007	0.0043	T14E8.4	hypothetical protein
	18575566	3.31	4.36	-2.07	0.0007	0.0043	T09F5.1	hypothetical protein
	18558523	11.31	10.11	2.29	0.0007	0.0043	puf-3	PUF (Pumilio/FBF) domain-containing
	18597354	7.21	8.22	-2.02	0.0007	0.0044	zip-10	bZIP transcription factor family
	18571348	6.86	5.29	2.97	0.0007	0.0044	fipr-13	FIP (Fungus-Induced Protein) Related
	18480429	5.34	6.52	-2.27	0.0007	0.0044	C38C6.3	hypothetical protein
	18573619	5.84	7.36	-2.89	0.0007	0.0044	M03F8.1	hypothetical protein
	18590492	3.85	4.88	-2.05	0.0007	0.0045	ugt-32	UDP-GlucuronosylTransferase
	18618266	10.96	8.69	4.82	0.0007	0.0046	ZK813.7	hypothetical protein
	18614358	5.59	7.12	-2.89	0.0007	0.0046	R07E3.6	hypothetical protein
	18515253	7.74	8.96	-2.33	0.0007	0.0046	osm-7	hypothetical protein
	18628788	4.55	5.58	-2.05	0.0007	0.0046	K05B2.4	hypothetical protein
	18453480	6.48	5.35	2.18	0.0007	0.0047	D1007.8	hypothetical protein
	18602054	5.54	7.14	-3.01	0.0007	0.0047	lon-3	Cuticle collagen lon-3
	18635199	8.35	7.33	2.02	0.0007	0.0047
	18571921	8.37	7.19	2.27	0.0007	0.0047	nspa-2	Nematode Specific Peptide family, group A
	18623507	8.46	9.63	-2.26	0.0007	0.0047	F13D11.4	hypothetical protein
	18604078	8.04	6.53	2.85	0.0008	0.0047	C16E9.1	hypothetical protein
	18459590	10.52	9.45	2.1	0.0008	0.0048	egg-4	EGG sterile (unfertilizable)
	18471865	6.57	5.51	2.07	0.0008	0.0048	klp-15	Kinesin-like protein
	18576427	10.06	8.14	3.78	0.0008	0.0048	del-6	DEgenerin Like
	18473518	7.35	8.82	-2.77	0.0008	0.0048	lron-9	eLRR (extracellular Leucine-Rich Repeat) ONly
	18570274	4.57	6.86	-4.88	0.0008	0.0049	grd-2	GRounDhog (hedgehog-like family)
	18607711	6.23	7.31	-2.12	0.0008	0.0049	nhr-25	Nuclear hormone receptor family member nhr-25
	18494757	4.87	5.89	-2.02	0.0008	0.005	C23H3.9	hypothetical protein
	18535055	3.78	5.52	-3.34	0.0008	0.005	C43F9.11	hypothetical protein
	18582461	4.91	6.55	-3.11	0.0008	0.0051	cyp-35A2	CYtochrome P450 family
	18580842	9.1	7.89	2.31	0.0008	0.0052
	18464106	3.74	4.89	-2.22	0.0009	0.0052	cutl-8	CUTiclin-Like
	18608216	4.85	6	-2.23	0.0009	0.0053	tre-4	Trehalase
	18545417	5.38	6.77	-2.62	0.0009	0.0053	Y57G11B.2	hypothetical protein
	18490494	5.48	6.7	-2.32	0.0009	0.0054	Y46G5A.29	hypothetical protein
	18615369	8.53	6.64	3.72	0.0009	0.0054	ttr-59	TransThyretin-Related family domain
	18616541	8.76	7.3	2.75	0.0009	0.0054	T25G12.3	hypothetical protein
	18612347	6.02	7.68	-3.17	0.0009	0.0054	H03E18.1	hypothetical protein
	18619185	8.81	7.3	2.84	0.0009	0.0055	C05D9.9	hypothetical protein
	18604561	6.24	5.24	2	0.0009	0.0055	C25A11.1	hypothetical protein
	18614407	5.64	7.2	-2.94	0.0009	0.0055	grd-1	GRounDhog (hedgehog-like family)
	18466036	6.86	5.7	2.23	0.0009	0.0056	cyp-36A1	Probable cytochrome P450 CYP36A1
	18586361	3.56	5.13	-2.97	0.0009	0.0056	EGAP9.3	hypothetical protein
	18516420	4.94	3.66	2.42	0.0009	0.0057	Y111B2A.2	hypothetical protein
	18514162	5.35	6.44	-2.13	0.0009	0.0057	M88.4	hypothetical protein
	18616392	7.94	6.46	2.78	0.0009	0.0057	T25B2.2	hypothetical protein
	18623200	5.78	7.28	-2.82	0.001	0.0057	F09F9.2	hypothetical protein
	18566786	4.88	6.06	-2.27	0.001	0.0058	ugt-39	UDP-GlucuronosylTransferase
	18512736	3.87	4.87	-2	0.001	0.0059	F56D2.3	hypothetical protein
	18532524	3.51	4.54	-2.04	0.001	0.0059	B0350.71	ncRNA
	18632734	7.52	8.66	-2.2	0.001	0.0059	W01C8.5	hypothetical protein
	18549891	5.16	6.25	-2.13	0.001	0.0059	C42D4.13	hypothetical protein
	18575755	8.34	7.31	2.04	0.001	0.006	T10H9.8	hypothetical protein
	18608598	4.58	5.89	-2.46	0.001	0.006	F18E9.4	hypothetical protein
	18483691	4.89	6.61	-3.29	0.001	0.0061	math-26	MATH (meprin-associated Traf homology) domain containing
	18515612	4.59	5.74	-2.21	0.001	0.0061	T17H7.1	hypothetical protein
	18536635	4.66	5.78	-2.17	0.001	0.0061	F13B12.3	hypothetical protein
	18563353	6.16	4.75	2.66	0.001	0.0061	C16D9.1	hypothetical protein
	18586146	5.31	6.51	-2.3	0.001	0.0061	D1054.9	hypothetical protein
	18554415	4.37	6.28	-3.74	0.001	0.0061	mam-3	MAM (Meprin, A5-protein, PTPmu) domain protein
	18606886	4.68	5.85	-2.25	0.0011	0.0062	nspc-19	Nematode Specific Peptide family, group C
	18613493	6.34	7.41	-2.1	0.0011	0.0063	K10B3.1	hypothetical protein
	18488478	5.53	6.8	-2.41	0.0011	0.0063	T13C2.2	hypothetical protein
	18587197	6.2	5.16	2.06	0.0011	0.0063	F14H3.12	hypothetical protein
	18619108	5.31	7.33	-4.07	0.0011	0.0064	pgp-5	P-GlycoProtein related
	18567087	5.59	3.75	3.58	0.0011	0.0064	F14F9.3	hypothetical protein
	18595096	6.37	8.02	-3.15	0.0011	0.0064	T03D8.6	hypothetical protein
	18555321	7.64	6.62	2.03	0.0011	0.0065	R10H10.7	hypothetical protein
	18540178	8.81	7.75	2.09	0.0011	0.0065
	18511501	5.56	6.58	-2.03	0.0012	0.0067	lin-48	hypothetical protein
	18492425	7.15	6.12	2.04	0.0012	0.0068	ZK669.3	GILT-like protein ZK669.3
	18594991	7.21	8.96	-3.36	0.0012	0.0068	grl-7	GRound-Like (grd related)
	18633010	5.65	6.98	-2.52	0.0012	0.0069	Y102A11A.5	hypothetical protein
	18626647	4.64	5.66	-2.03	0.0012	0.007	npax-2	N-terminal PAX (PAI domain only) protein
	18499691	4.24	6.04	-3.5	0.0013	0.0072	oac-30	O-ACyltransferase homolog
	18540803	8.21	7.13	2.1	0.0013	0.0072	M04B2.2	hypothetical protein
	18618255	8.95	6.6	5.09	0.0013	0.0073	ZK813.3	hypothetical protein
	18545423	8.88	7.09	3.47	0.0013	0.0073	Y57G11B.5	hypothetical protein
	18464966	6.18	7.33	-2.21	0.0013	0.0075	col-61	COLlagen
	18557127	4.95	6.55	-3.05	0.0013	0.0075	W09G12.10	hypothetical protein
	18463515	4.41	6.41	-3.99	0.0014	0.0076	Y87G2A.16	hypothetical protein
	18633316	7.79	5.77	4.06	0.0014	0.0076	Y62H9A.3	hypothetical protein
	18565856	2.9	5	-4.3	0.0014	0.0076	D1014.6	hypothetical protein
	18502178	6.49	7.52	-2.04	0.0014	0.0077	R12C12.9	hypothetical protein
	18483928	7.3	6.11	2.27	0.0014	0.0077	F40H3.2	hypothetical protein
	18603383	7.63	6.2	2.69	0.0014	0.0077	C08A9.10	hypothetical protein
	18495227	6.97	5.76	2.31	0.0014	0.0078	C31C9.6	hypothetical protein
	18468809	3.6	4.89	-2.45	0.0014	0.0079	F30A10.2	hypothetical protein
	18463443	4.88	5.89	-2.01	0.0015	0.0081	Y73E7A.8	hypothetical protein
	18582068	4.47	5.62	-2.22	0.0015	0.0083	clec-225	C-type LECtin
	18549953	7.3	8.39	-2.13	0.0015	0.0083	bicd-1	BICaudal D (Drosophila) homolog
	18508646	7.53	6.52	2.01	0.0015	0.0083	C06G4.1	KH domain-containing protein C06G4.1
	18632278	6.23	7.35	-2.18	0.0015	0.0084	T23F2.2	hypothetical protein
	18630199	5.17	6.28	-2.16	0.0016	0.0084	glo-1	Gut granule LOss
	18574697	5.74	6.77	-2.04	0.0016	0.0085	ugt-53	UDP-GlucuronosylTransferase
	18617353	9.43	7.52	3.75	0.0016	0.0086	Y62H9A.4	hypothetical protein
	18457351	8.79	7.25	2.92	0.0016	0.0086	F59C6.16	hypothetical protein
	18634521	4.06	6.4	-5.06	0.0016	0.0087
	18592869	6.45	7.64	-2.28	0.0016	0.0087	K07C11.8	hypothetical protein
	18484721	4.4	6.13	-3.32	0.0016	0.0087	F49E12.12	hypothetical protein
	18495789	7.96	6.67	2.44	0.0016	0.0087	C44B7.5	hypothetical protein
	18471508	8.19	5.81	5.22	0.0016	0.0088	K07A1.6	hypothetical protein
	18536810	6.91	5.73	2.27	0.0017	0.0089	F17E9.4	hypothetical protein
	18599946	3.82	5.76	-3.86	0.0017	0.009	Y47D7A.9	hypothetical protein
	18583928	6.35	8.11	-3.39	0.0017	0.009	C18C4.5	hypothetical protein
	18528819	5.8	4.59	2.31	0.0019	0.0098	Y22D7AR.10	hypothetical protein
	18630180	4.05	5.06	-2	0.0019	0.01	R07A4.4	hypothetical protein
	18518889	5.61	7.18	-2.97	0.0019	0.01	Y75B8A.28	hypothetical protein
	18470463	4.62	3.37	2.37	0.0019	0.0101	F55A3.7	hypothetical protein
	18600889	6.58	7.84	-2.39	0.002	0.0102	Y73C8B.1	hypothetical protein
	18595729	4.05	5.21	-2.23	0.002	0.0102	ptr-15	PaTched Related family
	18524301	6.96	8.24	-2.42	0.002	0.0104	F44E2.4	hypothetical protein
	18486206	7.06	5.67	2.63	0.002	0.0104	cutl-16	CUTiclin-Like
	18489190	5.33	6.39	-2.1	0.002	0.0104	T26C5.2	hypothetical protein
	18625497	4.28	5.73	-2.73	0.002	0.0105	nas-13	Zinc metalloproteinase nas-13
	18574365	7.4	6.23	2.24	0.0021	0.0106	pho-8	intestinal acid PHOsphatase
	18558802	5.79	4.66	2.19	0.0021	0.0108	Y54G2A.12	hypothetical protein
	18477357	4.22	5.35	-2.19	0.0021	0.0109	ZC434.10; ZC434.3	hypothetical protein
	18565846	4.51	6.12	-3.05	0.0021	0.0109	D1014.5	hypothetical protein
	18491953	5.35	6.68	-2.52	0.0022	0.011	wrt-1	Warthog protein 1 N-product
	18452525	6.88	5.68	2.3	0.0022	0.0111	C36B1.14	hypothetical protein
	18510037	7.57	6.32	2.39	0.0022	0.0112	C40H1.7	hypothetical protein
	18509612	5.4	6.79	-2.61	0.0022	0.0113	C34C12.6	CRAL-TRIO domain-containing protein C34C12.6
	18601281	4.01	5.35	-2.54	0.0022	0.0113	nstp-3	Nucleotide Sugar TransPorter family
	18500494	7.38	6.11	2.41	0.0022	0.0114	F59B10.4	hypothetical protein
	18478856	4.87	5.97	-2.14	0.0022	0.0114	C07E3.10	hypothetical protein
	18593385	7.82	6.4	2.68	0.0023	0.0115	K11G9.5	hypothetical protein
	18463342	2.94	4.84	-3.74	0.0023	0.0115	Y71G12B.18	hypothetical protein
	18573687	4.8	6.29	-2.79	0.0023	0.0116	clec-258	C-type LECtin
	18470307	6	4.8	2.29	0.0023	0.0117	fip-6	Fungus-Induced Protein
	18562116	5.86	4.4	2.74	0.0024	0.0119	clec-223	C-type LECtin
	18565877	11.28	9.65	3.09	0.0024	0.012	D1054.11	hypothetical protein
	18520590	5.15	6.83	-3.21	0.0024	0.012	C02F5.14	hypothetical protein
	18497113	4.98	3.88	2.14	0.0024	0.012	F08G2.13	ncRNA
	18617357	8.71	6.88	3.55	0.0024	0.012	Y62H9A.6	hypothetical protein
	18550851	5.31	6.67	-2.56	0.0025	0.0122	F01G10.9	hypothetical protein
	18614621	7.07	8.39	-2.5	0.0025	0.0122	R11.2	hypothetical protein
	18471723	6.79	5.7	2.12	0.0025	0.0124	K09H9.8	hypothetical protein
	18533665	6.95	8.51	-2.96	0.0025	0.0124	C10C5.4	Aminoacylase-1
	18559414	6.56	5.52	2.06	0.0025	0.0125	Y57G11C.51	hypothetical protein
	18508122	4.87	6.13	-2.41	0.0026	0.0127	B0393.5	hypothetical protein
	18603219	4.94	6.05	-2.15	0.0026	0.0127	C06G1.2	hypothetical protein
	18633322	10.08	8.4	3.19	0.0027	0.0131	Y62H9A.5	hypothetical protein
	18490186	4.21	5.27	-2.08	0.0027	0.0133	nhr-234	Nuclear Hormone Receptor family
	18608979	4.84	6	-2.23	0.0027	0.0133	F22F4.1	hypothetical protein
	18523239	7.98	6.24	3.34	0.0027	0.0133	col-8	Cuticle collagen 8
	18572534	7.96	6.84	2.17	0.0027	0.0134	twk-34	TWiK family of potassium channels
	18565334	7.99	6.03	3.88	0.0028	0.0136	fipr-10	FIP (Fungus-Induced Protein) Related
	18528889	5.89	7.23	-2.54	0.0029	0.014	fbxa-74	F-box A protein
	18504887	7.01	8.12	-2.17	0.003	0.0143	Y17G7B.8	hypothetical protein
	18606126	11.06	9.21	3.59	0.003	0.0144	C45B2.1	hypothetical protein
	18586100	10.82	9.34	2.79	0.0031	0.0147	D1054.10	hypothetical protein
	18496983	5.6	7.37	-3.41	0.0031	0.0147	dct-5	Protein dct-5
	18589211	5.7	4.4	2.46	0.0031	0.0147	F35B12.3	hypothetical protein
	18516733	9.11	7.41	3.25	0.0031	0.0149	Y37D8A.19	hypothetical protein
	18554582	7.15	8.7	-2.93	0.0033	0.0155	K11H12.4	hypothetical protein
	18635735	5.5	4.39	2.16	0.0033	0.0157
	18553946	6.46	5.09	2.59	0.0034	0.0157	col-101	COLlagen
	18620774	6.12	7.47	-2.57	0.0035	0.0162	C30G4.4	hypothetical protein
	18603100	5.62	6.62	-2.01	0.0035	0.0163	C05E11.3	hypothetical protein
	18476848	8.45	7.39	2.08	0.0035	0.0164	Y71F9B.13	hypothetical protein
	18463822	5.21	6.45	-2.36	0.0035	0.0164	cuti-1	CUTicle and epithelial Integrity
	18599849	3.89	2.76	2.18	0.0035	0.0164	Y46H3C.7	hypothetical protein
	18498100	6.56	5.42	2.2	0.0036	0.0165	F23F1.6	hypothetical protein
	18559568	4.93	6.05	-2.17	0.0036	0.0167	Y62E10A.19	hypothetical protein
	18468529	7.84	6.73	2.15	0.0038	0.0172	drsh-1	Ribonuclease 3
	18496171	6.01	7.03	-2.04	0.0038	0.0174	ptr-6	PaTched Related family
	18571508	5.83	4.74	2.13	0.0038	0.0176	F58D12.1; T08G5.19	hypothetical protein; ncRNA
	18633612	9.87	7.86	4.02	0.004	0.018	ZC373.2	hypothetical protein
	18619658	5.42	6.6	-2.26	0.004	0.0183	C11H1.5	hypothetical protein
	18580941	3.69	5.61	-3.77	0.0041	0.0184	ZC513.2	hypothetical protein
	18456997	4.95	6.12	-2.24	0.0041	0.0185	che-14	hypothetical protein
	18610771	6.01	4.88	2.19	0.0041	0.0185	F47E1.4	Solute carrier organic anion transporter family member
	18515636	9.26	8.23	2.04	0.0041	0.0186	tbp-1	TATA-box-binding protein
	18492500	6.95	5.91	2.06	0.0041	0.0187	rev-1	DNA repair protein REV1
	18558596	5.11	3.7	2.66	0.0041	0.0187	Y45F10C.2	UPF0375 protein Y45F10C.2
	18539609	5.19	6.53	-2.52	0.0045	0.0202	glf-1	GaLactoFuranose synthesis (UGM, UDP-galactopyranose mutase)
	18519193	7.83	6.77	2.08	0.0046	0.0204	ZC21.3	hypothetical protein
	18629330	7.93	5.94	3.98	0.0046	0.0206	K10C2.8	hypothetical protein
	18520167	3.61	5	-2.62	0.0046	0.0206	B0280.7	hypothetical protein
	18556483	4.54	5.62	-2.11	0.0048	0.021	dpy-20	Protein dumpy-20
	18567732	8.74	6.95	3.47	0.0049	0.0215	pqn-31	Prion-like-(Q/N-rich)-domain-bearing protein
	18581141	5.51	6.84	-2.52	0.005	0.022	ZK228.4	hypothetical protein
	18493075	7.01	5.98	2.04	0.005	0.022	B0454.17	ncRNA
	18613792	8.67	10.26	-3.01	0.005	0.022	M163.12	ncRNA
	18609686	3.69	4.79	-2.14	0.0051	0.0221	F38B6.2	hypothetical protein
	18550511	8.79	7.75	2.05	0.0053	0.023	C53D6.7	Galectin
	18580380	5.82	7.11	-2.44	0.0055	0.0235	cyp-42A1	CYtochrome P450 family
	18479104	12.09	10.86	2.34	0.0056	0.024	col-80	Putative cuticle collagen 80
	18599648	7.36	8.72	-2.56	0.0058	0.0246	Y43F8C.5	hypothetical protein
	18547903	3.83	4.92	-2.13	0.0059	0.0249	B0273.112	ncRNA
	18595822	3.55	4.81	-2.38	0.0059	0.025	T08G5.3	hypothetical protein
	18614858	8.4	9.41	-2.01	0.0059	0.025	T01C8.10	ncRNA
	18609327	5.39	6.58	-2.28	0.0059	0.0251	daf-6	hypothetical protein
	18599836	6.7	5.55	2.22	0.006	0.0252	Y46H3C.5	hypothetical protein
	18452435	8.96	7.96	2	0.006	0.0255	cdc-7	Cell Division Cycle related
	18627658	5.36	6.48	-2.17	0.0061	0.0257	F56C3.9	hypothetical protein
	18500735	5.6	6.76	-2.23	0.0062	0.026	cbn-1	Calcium BiNding protein homolog
	18596208	9.18	8.17	2.01	0.0062	0.0261	nas-20	Zinc metalloproteinase nas-20
	18633588	4.82	5.96	-2.21	0.0064	0.0268	mam-1	MAM (Meprin, A5-protein, PTPmu) domain protein
	18595922	5.25	6.37	-2.16	0.0067	0.0275	T10B5.10	hypothetical protein
	18550478	10.02	8.37	3.14	0.0068	0.028	col-119	COLlagen
	18615090	11.96	10.59	2.58	0.0068	0.0281	T04F8.8	hypothetical protein
	18546507	5.56	4.24	2.51	0.0069	0.0284	Y73F8A.1161	ncRNA
	18573361	3.49	4.72	-2.35	0.0069	0.0284	K11G9.3	Carboxylic ester hydrolase
	18532781	4.09	5.73	-3.11	0.007	0.0287	C01B10.47	ncRNA
	18481093	5.34	6.34	-2	0.007	0.0288	cpn-2	CalPoNin
	18562911	7.16	5.81	2.56	0.0071	0.0288	fipr-7	FIP (Fungus-Induced Protein) Related
	18567960	10.61	9.4	2.31	0.0071	0.0289	fipr-2	FIP (Fungus-Induced Protein) Related
	18600666	4.16	5.56	-2.63	0.0074	0.0299	clec-242	C-type LECtin
	18601214	9.41	8.18	2.35	0.0075	0.0303	pqn-94	Prion-like-(Q/N-rich)-domain-bearing protein
	18567942	5.53	6.8	-2.4	0.0075	0.0304	F23H12.5	hypothetical protein
	18543602	9.78	8.76	2.03	0.0077	0.0309	Y11D7A.3	hypothetical protein
	18605362	10.23	8.75	2.79	0.0077	0.0312	col-179	COLlagen
	18470114	3.34	4.44	-2.14	0.0078	0.0313	F49D11.6	hypothetical protein
	18567443	3.96	4.98	-2.03	0.0078	0.0315	F18E3.12	hypothetical protein
	18565602	3.89	5.06	-2.27	0.0084	0.0335	C54F6.3	hypothetical protein
	18453711	6.17	4.75	2.68	0.0086	0.034	trt-1	Telomerase Reverse Transcriptase
	18588239	9.58	8.2	2.61	0.0086	0.0341	fipr-1	FIP (Fungus-Induced Protein) Related
	18509794	6.39	7.68	-2.45	0.0086	0.0341	cyp-25A2	CYtochrome P450 family
	18553365	3.54	4.73	-2.28	0.0087	0.0342	F57H12.6	hypothetical protein
	18635551	3.98	5.12	-2.21	0.0089	0.035
	18595605	9.49	7.97	2.87	0.0097	0.0376	col-147	COLlagen
	18538408	5.67	6.76	-2.12	0.01	0.0383	F44D12.16	hypothetical protein
	18536679	5.92	7.53	-3.05	0.0107	0.0406	F13E9.13	hypothetical protein
	18528369	7.41	6.41	2.01	0.0115	0.043	polq-1	DNA polymerase theta
	18537533	6.39	7.42	-2.04	0.0115	0.0431	clec-180	C-type lectin domain-containing protein 180
	18541917	4.11	5.4	-2.45	0.0122	0.0452	T07G12.3	hypothetical protein
	18488896	7.45	6.33	2.17	0.0126	0.0466	T23B7.3	hypothetical protein
	18504672	6	4.84	2.22	0.0127	0.0467	W10G11.3	hypothetical protein
	18548252	4.02	5.03	-2.01	0.0132	0.0481	egl-38	hypothetical protein
