# Supplementary material for: Transcriptomic Analysis Reveals JAK2/MPL-Independent Effects of Calreticulin Mutations in a C. elegans Model
Source: Cells. 2023 Jan 2;12(1):186. doi: 10.3390/cells12010186 (PMC9818371; doi:10.3390/cells12010186)
Supplement: Supplementary file 1 [file cells-12-00186-s001.zip › Table S5.xlsx]

## Sheet: Hoja1
	Table S5. Results of microarray analysis when comparing CRT-1(mut1) vs CRT-1(KO)
	ID	CRT-1(mut1) Avg (log2)	CRT-1(KO) Avg (log2)	Fold Change	P-val	FDR P-val	Gene Symbol	Description
	18598977	11.18	6.41	27.2	1.24e-12	3.52e-08	crt-1	Calreticulin
	18635457	2.76	7.68	-30.21	6.17e-11	8.76e-07
	18623159	8.13	10.08	-3.87	4.34e-07	0.0018	tts-1	ncRNA
	18538697	7.06	5.11	3.88	7.29e-07	0.0018	drd-50	dietary restriction down regulated
	18476062	7.17	5.26	3.76	4.77e-07	0.0018	haf-6	HAlF transporter (PGP related)
	18488051	6.21	7.58	-2.58	5.12e-07	0.0018	T06D8.3	hypothetical protein
	18556434	4.42	5.73	-2.49	3.3e-07	0.0018	dpy-9	DumPY: shorter than wild-type
	18556853	9.34	10.59	-2.39	6.78e-07	0.0018	pqn-74	Prion-like-(Q/N-rich)-domain-bearing protein
	18557521	8.21	10.22	-4.03	7.49e-07	0.0018	col-120	COLlagen
	18567238	10.65	8.09	5.91	8.16e-07	0.0018	pud-1.2; pud-1.1	Protein Up-regulated in Daf-2(gf)
	18573737	8.19	10.22	-4.09	7.05e-07	0.0018	R02F11.1	hypothetical protein
	18594507	6.78	8.94	-4.46	4e-07	0.0018	R12A1.3	hypothetical protein
	18619060	6.72	4.52	4.6	8.58e-07	0.0018	C04E7.3	hypothetical protein
	18626663	3.3	4.45	-2.22	8.89e-07	0.0018	F48B9.9	ncRNA
	18598700	10.28	7.82	5.5	9.73e-07	0.0018	pud-1.2; pud-1.1	Protein Up-regulated in Daf-2(gf)
	18588830	4.3	5.81	-2.85	1.23e-06	0.0022	F29G9.14	ncRNA
	18620962	7.5	9.55	-4.16	1.73e-06	0.0029	lgc-21	Ligand-Gated ion Channel
	18567241	11	8.7	4.94	2.04e-06	0.0029	pud-2.2; pud-2.1	Protein Up-regulated in Daf-2(gf)
	18587324	11	8.7	4.94	2.04e-06	0.0029	pud-2.2; pud-2.1	Protein Up-regulated in Daf-2(gf)
	18472371	8.74	10.31	-2.97	3e-06	0.003	R12E2.7	hypothetical protein
	18512989	3.18	4.73	-2.93	2.34e-06	0.003	F59B2.12	hypothetical protein
	18536954	5.54	6.71	-2.24	2.52e-06	0.003	F20B10.3	hypothetical protein
	18575180	4.43	5.46	-2.05	2.62e-06	0.003	T06E4.14	hypothetical protein
	18582772	8.38	9.72	-2.53	3.02e-06	0.003	C06B3.6	hypothetical protein
	18592238	6.32	7.96	-3.1	2.57e-06	0.003	H19N07.3	hypothetical protein
	18596111	9.22	10.28	-2.08	2.83e-06	0.003	pmp-5	Peroxisomal Membrane Protein related
	18616740	5.91	8.12	-4.61	2.79e-06	0.003	lpr-6	LiPocalin-Related protein
	18619063	5.29	4.03	2.39	2.78e-06	0.003	C04E7.4	hypothetical protein
	18454469	7.26	8.92	-3.17	5.64e-06	0.0033	col-60	COLlagen
	18458679	3.69	5.58	-3.71	4.5e-06	0.0033	R12E2.14	hypothetical protein
	18463137	6.12	7.24	-2.18	3.76e-06	0.0033	Y71F9AL.4	hypothetical protein
	18475998	8.25	9.37	-2.18	4.23e-06	0.0033	Y48G1BR.1	hypothetical protein
	18476090	7.72	9.3	-2.99	4.67e-06	0.0033	Y48G8AL.16	hypothetical protein
	18481652	6.01	7.6	-3.02	3.71e-06	0.0033	F07H5.8	hypothetical protein
	18483045	8.9	7.8	2.15	5.38e-06	0.0033	F27E5.1	hypothetical protein
	18506823	8.47	10.23	-3.38	3.58e-06	0.0033	abu-14	Activated in Blocked Unfolded protein response
	18507003	6.17	8.56	-5.23	4.46e-06	0.0033	wrt-10	WaRThog (hedgehog-like family)
	18509362	6.63	8.27	-3.1	5.45e-06	0.0033	col-90	Putative cuticle collagen 90
	18546366	8.21	9.95	-3.35	5.46e-06	0.0033	bli-6	BLIstered cuticle
	18550679	6.49	8.29	-3.47	5.05e-06	0.0033	D2096.6	hypothetical protein
	18563092	4.84	7.45	-6.13	5.43e-06	0.0033	srr-6	Serpentine Receptor, class R
	18567233	5.65	3.81	3.56	5.37e-06	0.0033	pud-4	Protein Up-regulated in Daf-2(gf)
	18592103	6.64	8.47	-3.55	5.4e-06	0.0033	clec-229	C-type LECtin
	18595207	5.17	7.11	-3.82	4.69e-06	0.0033	T04C12.14	ncRNA
	18603195	7.3	9.1	-3.49	5.56e-06	0.0033	C06G1.1	hypothetical protein
	18616817	7.39	10.09	-6.5	5.32e-06	0.0033	lpr-3	LiPocalin-Related protein
	18622639	6.17	8.41	-4.72	5.06e-06	0.0033	dpy-3	DumPY: shorter than wild-type
	18575177	7.24	8.97	-3.33	5.96e-06	0.0034	pqn-63	Prion-like-(Q/N-rich)-domain-bearing protein
	18518039	5.02	7	-3.95	6.34e-06	0.0035	Y53G8AR.10	ncRNA
	18625111	4.53	5.83	-2.46	6.29e-06	0.0035	F35A5.4	hypothetical protein
	18483956	8.39	9.51	-2.18	6.55e-06	0.0035	F41C3.2	hypothetical protein
	18533547	3.29	4.64	-2.56	6.63e-06	0.0035	C09G12.5	hypothetical protein
	18519120	5.96	4.7	2.39	7.37e-06	0.0035	Y82E9BR.5	hypothetical protein
	18542887	6.19	7.84	-3.13	7e-06	0.0035	W02A2.9	hypothetical protein
	18610092	4.21	5.5	-2.43	7.23e-06	0.0035	F41D9.6	ncRNA
	18620842	5.74	7.6	-3.62	7.62e-06	0.0036	dpy-8	DumPY: shorter than wild-type
	18498633	4.1	5.45	-2.55	7.88e-06	0.0037	F33H12.7	hypothetical protein
	18587327	4.21	3.09	2.17	8.34e-06	0.0038	pud-3	Protein Up-regulated in Daf-2(gf)
	18618113	5.95	7.27	-2.49	8.24e-06	0.0038	ZK662.2	hypothetical protein
	18577358	7.02	5.5	2.88	8.64e-06	0.0038	clec-218	C-type LECtin
	18543279	6.91	8.2	-2.45	9.3e-06	0.0041	pqn-76; abu-5; pqn-78	Prion-like-(Q/N-rich)-domain-bearing protein; Activated in Blocked Unfolded protein response
	18486634	5.45	7.12	-3.19	9.73e-06	0.0041	M02G9.2	hypothetical protein
	18616764	6.86	9.35	-5.64	9.6e-06	0.0041	lpr-4	LiPocalin-Related protein
	18453349	10.88	11.89	-2.02	1.01e-05	0.0042	acdh-1	Acyl CoA DeHydrogenase
	18477444	3.24	4.47	-2.35	1.08e-05	0.0044	ZK1025.4	hypothetical protein
	18481662	9.97	11.13	-2.24	1.13e-05	0.0044	vhp-1	Tyrosine-protein phosphatase vhp-1
	18499262	8.36	10.05	-3.23	1.12e-05	0.0044	msra-1	Methionine Sulfoxide Reductase A
	18471685	9.12	11.01	-3.71	1.19e-05	0.0044	col-65	COLlagen
	18553047	7.9	9.27	-2.58	1.18e-05	0.0044	F53B2.8	hypothetical protein
	18570305	7.54	5.91	3.09	1.19e-05	0.0044	lipl-2	Lipase
	18476075	10.66	11.83	-2.25	1.21e-05	0.0045	Y48G8AL.12	hypothetical protein
	18480434	10.03	11.63	-3.04	1.23e-05	0.0045	tag-297	hypothetical protein
	18553423	9.44	11.03	-3	1.3e-05	0.0047	col-104	COLlagen
	18467576	8.96	10.75	-3.47	1.49e-05	0.0051	F10D11.6	hypothetical protein
	18489178	3.95	5.02	-2.1	1.52e-05	0.0051	T25E4.1	hypothetical protein
	18561415	6.27	7.64	-2.59	1.52e-05	0.0051	pqn-2	Prion-like-(Q/N-rich)-domain-bearing protein
	18567774	6.35	8.12	-3.42	1.44e-05	0.0051	asp-12	ASpartyl Protease
	18578657	4.63	6.04	-2.65	1.55e-05	0.0051	Y39B6A.27	hypothetical protein
	18585275	6.82	8.31	-2.81	1.55e-05	0.0051	C49G7.10	hypothetical protein
	18601975	5.8	7.15	-2.56	1.52e-05	0.0051	lron-2	eLRR (extracellular Leucine-Rich Repeat) ONly
	18459361	7.66	9.21	-2.91	1.61e-05	0.0051	T10E9.3	hypothetical protein
	18466050	8.49	10.73	-4.74	1.61e-05	0.0051	noah-1	NOmpA Homolog (Drosophila nompA: no mechanoreceptor potential A)
	18497340	9.81	11.44	-3.1	1.61e-05	0.0051	col-73	COLlagen
	18591632	7.44	6.05	2.63	1.64e-05	0.0052	fbxa-192	F-box A protein
	18571589	4.28	5.34	-2.08	1.66e-05	0.0052	F58E6.13	hypothetical protein
	18596755	6.84	7.93	-2.14	1.7e-05	0.0053	T21C9.9	hypothetical protein
	18553974	4.08	5.64	-2.96	1.74e-05	0.0053	K03D3.5	hypothetical protein
	18575870	8.66	9.87	-2.31	1.75e-05	0.0053	T15B7.1	hypothetical protein
	18462850	6.95	9.38	-5.39	1.83e-05	0.0055	Y65B4BL.1	hypothetical protein
	18549409	9.62	8.6	2.03	1.94e-05	0.0057	dod-24	Downstream Of DAF-16 (regulated by DAF-16)
	18543282	5.47	6.7	-2.35	2.01e-05	0.0059
	18577326	7.4	9.45	-4.14	2.03e-05	0.0059	mlt-11; W01F3.4	hypothetical protein; ncRNA
	18476005	9.51	10.57	-2.08	2.11e-05	0.0061	Y48G1BR.1	hypothetical protein
	18561405	6.33	8.21	-3.69	2.21e-05	0.0063
	18570777	9.55	10.85	-2.46	2.38e-05	0.0066	F53F1.4	hypothetical protein
	18595579	5.17	6.7	-2.89	2.37e-05	0.0066	T06E4.12	hypothetical protein
	18535764	6.2	7.8	-3.02	2.48e-05	0.0067	C50F7.5	hypothetical protein
	18546147	6.38	5.17	2.31	2.49e-05	0.0067	smf-3	yeast SMF (divalent cation transporter) homolog
	18588358	3.31	4.53	-2.33	2.52e-05	0.0067	try-8	TRYpsin-like protease
	18622280	4.95	6.46	-2.85	2.47e-05	0.0067	lgx-1	Lin-12 and Glp-1 X-hybridizing
	18485735	3.3	5.64	-5.04	2.63e-05	0.007	F59H6.3	hypothetical protein
	18617598	7.51	6.45	2.08	2.67e-05	0.007	cbs-1	Cystathionine Beta-Synthase
	18564387	5.43	6.59	-2.23	2.75e-05	0.0072	zip-5	bZIP transcription factor family
	18548494	8.84	10.1	-2.39	2.84e-05	0.0073	swt-3	Sugar transporter SWEET
	18550457	9.09	11.09	-4.02	2.94e-05	0.0074	col-138	COLlagen
	18633021	4.78	5.92	-2.21	2.97e-05	0.0074	Y102A11A.7	hypothetical protein
	18573043	5.69	7.23	-2.91	3.02e-05	0.0074	K09D9.1	hypothetical protein
	18510209	2.73	4.75	-4.05	3.06e-05	0.0075	C48B4.12	hypothetical protein
	18528133	6.48	8.14	-3.15	3.11e-05	0.0076	T24C4.4	hypothetical protein
	18486002	4.81	3.64	2.24	3.23e-05	0.0078	K02E7.6	hypothetical protein
	18560836	9.79	11.33	-2.9	3.31e-05	0.0079	ZK180.5	hypothetical protein
	18553172	5.68	4.34	2.52	3.39e-05	0.008	F55G1.15	hypothetical protein
	18557007	5.37	4.09	2.44	3.54e-05	0.008	asm-3	Putative sphingomyelin phosphodiesterase asm-3
	18595414	9.54	10.64	-2.15	3.47e-05	0.008	T05E12.6	hypothetical protein
	18599234	6.29	5.05	2.37	3.44e-05	0.008	sws-1	SWS1 homolog
	18612750	6.08	8.01	-3.81	3.51e-05	0.008	K02E10.4	hypothetical protein
	18626196	3.98	5.31	-2.52	3.62e-05	0.0082	dpy-7	Cuticle collagen dpy-7
	18476583	9.29	10.96	-3.18	3.77e-05	0.0082	grl-16	GRound-Like (grd related)
	18503800	6.86	5.69	2.25	3.71e-05	0.0082	T24B8.5	hypothetical protein
	18606070	6.9	8.41	-2.85	3.68e-05	0.0082	let-4	Leucine-rich repeat-containing protein let-4
	18616755	6.85	9.2	-5.08	3.77e-05	0.0082	lpr-5	LiPocalin-Related protein
	18625830	5.22	4.2	2.04	3.79e-05	0.0082	F41G4.4	hypothetical protein
	18568239	6.9	8.08	-2.26	3.97e-05	0.0085	asns-1	Asparagine synthetase
	18589942	7.46	9.09	-3.11	4.02e-05	0.0085	F41F3.3	hypothetical protein
	18576006	8.7	10.19	-2.8	4.14e-05	0.0087	grd-6	GRounDhog (hedgehog-like family)
	18536599	4.24	5.29	-2.08	4.25e-05	0.0088	F12F6.12	ncRNA
	18544421	5.64	7.24	-3.04	4.29e-05	0.0088	col-115	COLlagen
	18531521	6.49	8.33	-3.57	4.32e-05	0.0088	col-97	COLlagen
	18487151	4.46	6.42	-3.91	4.38e-05	0.0089	cdh-7	CaDHerin family
	18596461	7.49	9.53	-4.12	4.67e-05	0.0093	T19A5.3	hypothetical protein
	18534810	10.8	12.17	-2.59	4.84e-05	0.0094	col-107	COLlagen
	18479063	5.6	7.75	-4.42	5.18e-05	0.0097	C09F9.2	hypothetical protein
	18545574	6.42	7.68	-2.39	5.17e-05	0.0097	Y57G11C.42	hypothetical protein
	18582341	5.9	7.5	-3.03	5.17e-05	0.0097	C02E7.7	hypothetical protein
	18613758	6.93	8.53	-3.03	5.38e-05	0.01	M153.1	hypothetical protein
	18540381	5.91	4.89	2.03	5.55e-05	0.0102	K08D10.14	hypothetical protein
	18606946	5.01	6.51	-2.82	5.92e-05	0.0108	E01G6.1	hypothetical protein
	18486679	6.06	8	-3.83	6.05e-05	0.0108	dao-2	Dauer or Aging adult Overexpression
	18555168	4.77	6.36	-3.01	6.06e-05	0.0108	R09E10.13	hypothetical protein
	18635645	5.1	3.68	2.66	6.1e-05	0.0108
	18513226	5.39	7.08	-3.24	6.24e-05	0.0109	H19M22.3	hypothetical protein
	18501892	8.89	9.95	-2.09	6.57e-05	0.0113	tts-2	ncRNA
	18610381	5.96	7.07	-2.17	6.55e-05	0.0113	F45E1.4	hypothetical protein
	18472362	9.38	11.11	-3.32	6.62e-05	0.0113	R12E2.15	hypothetical protein
	18629545	4.12	5.54	-2.67	6.71e-05	0.0114	M03B6.3	hypothetical protein
	18481543	6.59	8.22	-3.09	7e-05	0.0117	F01D5.6	hypothetical protein
	18561566	3.06	4.43	-2.58	6.96e-05	0.0117	B0222.10	hypothetical protein
	18464121	8.08	9.2	-2.18	7.24e-05	0.0119	ptr-23	PaTched Related family
	18523691	6.62	7.7	-2.11	7.21e-05	0.0119	F28F5.6	hypothetical protein
	18497465	8.63	10.45	-3.51	7.28e-05	0.0119	F13H8.5	hypothetical protein
	18491360	10.87	12.38	-2.85	7.78e-05	0.0123	rol-1	ROLler: helically twisted, animals roll when moving
	18523094	9.23	10.54	-2.49	7.72e-05	0.0123	col-91	Putative cuticle collagen 91
	18530635	6.92	8.55	-3.08	7.75e-05	0.0123	pho-9	intestinal acid PHOsphatase
	18550966	8.1	9.79	-3.22	7.59e-05	0.0123	col-130	COLlagen
	18558393	11.2	12.7	-2.83	7.73e-05	0.0123	dpy-4	DumPY: shorter than wild-type
	18619451	4.85	7.71	-7.28	7.79e-05	0.0123	C09B8.4	hypothetical protein
	18570978	6.8	5.56	2.36	7.87e-05	0.0124	lipl-1	Lipase
	18574047	8	9.11	-2.16	8.06e-05	0.0126	pqn-54	Prion-like-(Q/N-rich)-domain-bearing protein
	18591546	5.54	7.49	-3.86	8.33e-05	0.013	col-156	COLlagen
	18472323	6.97	8.94	-3.92	8.41e-05	0.0131	suro-1	SUPpressor of ROller
	18510218	7.35	9.02	-3.18	8.64e-05	0.0133	nhr-6	Nuclear Hormone Receptor family
	18486646	4.54	5.68	-2.21	8.93e-05	0.0137	M02G9.3	hypothetical protein
	18520530	6.59	8.4	-3.49	9.03e-05	0.0138	agmo-1	Alkylglycerol monooxygenase homolog
	18501709	6.9	8	-2.15	9.61e-05	0.0142	R03C1.1	hypothetical protein
	18565159	5.43	6.55	-2.17	9.71e-05	0.0143	C50B8.5	hypothetical protein
	18458043	8.47	10.48	-4.03	9.81e-05	0.0143	col-49	COLlagen
	18466522	4.84	6.37	-2.89	0.0001	0.0146	phat-1	PHAryngeal gland Toxin-related
	18466529	6.21	7.58	-2.58	0.0001	0.0146	phat-2	PHAryngeal gland Toxin-related
	18547893	5.89	7.05	-2.23	0.0001	0.0146	clec-52	C-type LECtin
	18567017	5.8	4.76	2.05	0.0001	0.0146	F14D7.6	hypothetical protein
	18602543	6.63	8.21	-2.98	0.0001	0.0147	adt-1	ADAMTS family
	18538726	8.68	10.56	-3.69	0.0001	0.0148	noah-2	NOmpA Homolog (Drosophila nompA: no mechanoreceptor potential A)
	18599106	5.16	6.42	-2.41	0.0001	0.0153	Y38H6C.23	hypothetical protein
	18582082	3.34	4.84	-2.83	0.0001	0.0158	B0365.9	hypothetical protein
	18617793	6.03	4.78	2.37	0.0001	0.0158	dot-1.5	Histone-lysine N-methyltransferase, H3 lysine-79 specific
	18490831	6.26	7.47	-2.32	0.0001	0.0161	Y51B9A.12	ncRNA
	18493700	6.4	7.71	-2.49	0.0001	0.0161	C07E3.3	hypothetical protein
	18575832	9.17	10.7	-2.89	0.0001	0.0161	col-157	COLlagen
	18476956	9.07	11.04	-3.93	0.0001	0.0161	Y71G12B.25	hypothetical protein
	18517626	5.94	7.34	-2.64	0.0001	0.0161	Y47D3B.6	hypothetical protein
	18543570	6.96	5.5	2.74	0.0001	0.0161	flh-3	FLYWCH zinc finger transcription factor homolog
	18579806	3.7	5.09	-2.62	0.0001	0.0161	Y58A7A.7; Y58A7A.8	ncRNA
	18579808	3.7	5.09	-2.62	0.0001	0.0161	Y58A7A.7; Y58A7A.8	ncRNA
	18594284	7	5.86	2.21	0.0001	0.0161	fpn-1.2	FerroPortiN
	18475690	8.35	9.89	-2.9	0.0001	0.0161	Y47G6A.15	hypothetical protein
	18601002	5.44	7.81	-5.16	0.0001	0.0161	Y75B7AR.1	hypothetical protein
	18503370	5.48	6.55	-2.1	0.0001	0.0163	dpy-10	Cuticle collagen dpy-10
	18561801	7.19	5.84	2.54	0.0001	0.0163	B0507.3	hypothetical protein
	18592451	4.67	5.75	-2.11	0.0001	0.0163	K01D12.9	hypothetical protein
	18599562	7.97	8.98	-2.01	0.0001	0.0163	Y43F8B.2	hypothetical protein
	18537444	9.13	10.78	-3.15	0.0001	0.0165	dpy-13	Cuticle collagen dpy-13
	18630051	4.78	5.92	-2.21	0.0001	0.0165	R04B3.3	hypothetical protein
	18540716	8.34	9.48	-2.2	0.0001	0.0166	trx-3	ThioRedoXin [see also xtr]
	18502360	4.49	5.55	-2.08	0.0001	0.0168	T01B7.8	hypothetical protein
	18568934	5.37	6.58	-2.31	0.0001	0.0169	F32D8.3	hypothetical protein
	18633010	5.63	7.99	-5.13	0.0001	0.0169	Y102A11A.5	hypothetical protein
	18454813	6.21	7.53	-2.51	0.0001	0.0171	col-58	COLlagen
	18459023	6.38	7.78	-2.66	0.0001	0.0174	T06A4.3	hypothetical protein
	18493140	8.06	10.32	-4.77	0.0001	0.0174	sqt-1	Cuticle collagen sqt-1
	18500026	9.96	11.8	-3.58	0.0002	0.0175	col-38	COLlagen
	18552254	6.55	5.1	2.73	0.0002	0.0175	clec-165	C-type LECtin
	18627064	5.69	8.16	-5.52	0.0002	0.0175	wrt-2	WaRThog (hedgehog-like family)
	18502392	8.09	9.19	-2.14	0.0002	0.0177	abu-11	Activated in Blocked Unfolded protein response
	18635671	5.93	4.83	2.15	0.0002	0.0177
	18635721	6.02	7.2	-2.27	0.0002	0.0179
	18518646	6.51	8.12	-3.04	0.0002	0.0179	cdh-12	CaDHerin family
	18568946	7.79	8.9	-2.16	0.0002	0.018	F32D8.7	hypothetical protein
	18501661	4.62	6.21	-3.02	0.0002	0.0181	col-77	COLlagen
	18527786	7.42	9.16	-3.35	0.0002	0.0181	T17H7.7	hypothetical protein
	18567439	4.35	5.83	-2.8	0.0002	0.0181	F18E3.11	hypothetical protein
	18623096	5.18	6.44	-2.4	0.0002	0.0181	oac-14	O-ACyltransferase homolog
	18615016	4.78	6.87	-4.24	0.0002	0.0182	T03G6.1	hypothetical protein
	18475867	6.96	8.38	-2.67	0.0002	0.0183	Y47H10A.5	hypothetical protein
	18558023	8.3	9.97	-3.18	0.0002	0.0186	col-109	COLlagen
	18562755	8.03	9.09	-2.08	0.0002	0.0186	catp-3	Cation transporting ATPase
	18465867	8	9.18	-2.26	0.0002	0.0187	sem-2	hypothetical protein
	18477545	8.38	10.4	-4.07	0.0002	0.0187	col-63	COLlagen
	18592262	7.01	8.92	-3.75	0.0002	0.0187	H23N18.5	hypothetical protein
	18600465	6.17	7.34	-2.25	0.0002	0.0187	Y5H2A.5	ncRNA
	18488367	3.84	4.91	-2.1	0.0002	0.0189	T10D4.15	hypothetical protein
	18605807	6.5	5.23	2.42	0.0002	0.0189	C41A3.1	hypothetical protein
	18463443	5.05	6.67	-3.07	0.0002	0.0199	Y73E7A.8	hypothetical protein
	18520069	5.52	6.66	-2.21	0.0002	0.02	fbn-1	FiBrilliN homolog
	18626025	5.23	6.84	-3.05	0.0002	0.02	F44A6.5	hypothetical protein
	18488624	6	7.41	-2.66	0.0002	0.0201	dpy-2	Cuticle collagen dpy-2
	18534521	6.75	8.34	-3	0.0002	0.0202	C30H6.5	hypothetical protein
	18562051	7.86	9	-2.21	0.0002	0.0203	C02E7.6	hypothetical protein
	18612629	8.53	10.87	-5.07	0.0002	0.0203	H42K12.3	hypothetical protein
	18588591	7.85	9.37	-2.86	0.0002	0.0206	F26F2.10	hypothetical protein
	18525231	6.27	7.97	-3.25	0.0002	0.0209	H10E21.4	hypothetical protein
	18535282	7.87	9.2	-2.52	0.0002	0.0209	col-14	COLlagen
	18589632	10.81	9.66	2.22	0.0002	0.0211	folt-2	Folate-like transporter 2
	18565069	3.53	4.71	-2.26	0.0002	0.0214	C49G7.6	hypothetical protein
	18472367	5.82	7.37	-2.93	0.0002	0.0219	R12E2.6	hypothetical protein
	18634189	8.76	10.81	-4.13	0.0002	0.0219	wrt-4	Warthog protein 4 N-product
	18499729	3.54	4.6	-2.08	0.0002	0.0227	F49C5.12	hypothetical protein
	18479448	4.99	3.82	2.25	0.0002	0.0228	C16C8.20	hypothetical protein
	18621174	8.6	10.28	-3.21	0.0003	0.0236	col-175	COLlagen
	18476569	5.37	6.61	-2.36	0.0003	0.0238	Y65B4BL.6	hypothetical protein
	18575610	4.9	6.42	-2.87	0.0003	0.0238	clec-47	C-type LECtin
	18483062	5.41	7.19	-3.42	0.0003	0.024	phg-1	Growth arrest-specific protein 1 homolog
	18621603	8.14	10.16	-4.06	0.0003	0.024	acn-1	Inactive angiotensin-converting enzyme-related protein
	18477265	9.76	8.35	2.66	0.0003	0.0244	ZC247.1	hypothetical protein
	18499672	7.48	8.99	-2.83	0.0003	0.0249	lin-42	Period protein homolog lin-42
	18532461	6.76	7.93	-2.25	0.0003	0.0249	faah-2	Fatty Acid Amide Hydrolase homolog
	18582119	4.28	5.97	-3.22	0.0003	0.0249	oac-1	O-ACyltransferase homolog
	18619236	6.34	7.78	-2.72	0.0003	0.0249	C05E7.2	hypothetical protein
	18569391	7.39	8.49	-2.14	0.0003	0.025	pha-4	Defective pharyngeal development protein 4
	18463365	4.84	5.84	-2.01	0.0003	0.0252	Y71G12B.37	ncRNA
	18540054	7.99	9.22	-2.35	0.0003	0.0252	swt-1	Sugar transporter SWEET1
	18543113	6.68	7.94	-2.4	0.0003	0.0257	W08E12.5; W08E12.4	hypothetical protein
	18477357	4.2	6.28	-4.25	0.0003	0.0258	ZC434.10; ZC434.3	hypothetical protein
	18460159	8.11	9.12	-2.01	0.0003	0.0259	T28B8.1	hypothetical protein
	18466869	5.11	6.31	-2.31	0.0003	0.0259	C54G4.4	hypothetical protein
	18497331	8.75	10.39	-3.13	0.0003	0.0259	col-17	COLlagen
	18534626	9.95	8.72	2.34	0.0003	0.0259	C32H11.4	hypothetical protein
	18552947	7.63	6.16	2.77	0.0003	0.0259	F49F1.7	hypothetical protein
	18628851	8.05	9.3	-2.38	0.0003	0.0259	dao-3	Dauer or Aging adult Overexpression
	18604780	6.67	8.38	-3.27	0.0003	0.0262	C26B9.3	hypothetical protein
	18595295	7.2	5.72	2.78	0.0003	0.0264	T05B11.4	hypothetical protein
	18567935	10.6	12.29	-3.24	0.0003	0.0272	sqt-3	Cuticle collagen 1
	18576575	5.67	4.25	2.66	0.0004	0.028	wago-10	Piwi-like protein
	18610838	6.79	5.78	2.01	0.0004	0.028	F47G3.3	hypothetical protein
	18579102	7.66	8.76	-2.14	0.0004	0.028	Y44A6C.1	hypothetical protein
	18498472	5.74	7.06	-2.49	0.0004	0.0289	mltn-1	MLt-TeN (mlt-10) related
	18626490	8.26	9.49	-2.35	0.0004	0.0291	ipla-2	Intracelllar PhosphoLipase A family
	18534110	4.87	6.12	-2.38	0.0004	0.03	C26B2.8	hypothetical protein
	18490770	5.67	6.93	-2.39	0.0004	0.0301	Y49F6B.15	ncRNA
	18576093	7.97	9.52	-2.93	0.0004	0.0301	T19B10.2	hypothetical protein
	18629818	6.29	7.67	-2.6	0.0004	0.0303	R02E4.3	hypothetical protein
	18488379	4.04	5.09	-2.07	0.0004	0.0307	ins-31	INSulin related
	18501178	7.88	8.96	-2.1	0.0004	0.0309	cpg-7	Chondroitin proteoglycan 7
	18627216	9.3	11.43	-4.38	0.0004	0.0311	F53B1.4	hypothetical protein
	18635129	8.66	10.18	-2.87	0.0004	0.0311
	18635689	7.69	5.64	4.15	0.0004	0.0311
	18524301	6.68	8.46	-3.44	0.0005	0.0315	F44E2.4	hypothetical protein
	18492525	9.91	11.12	-2.31	0.0005	0.032	ZK84.1	hypothetical protein
	18614358	6.04	8.08	-4.1	0.0005	0.0321	R07E3.6	hypothetical protein
	18593566	4.93	6.25	-2.5	0.0005	0.0322	M03E7.4	hypothetical protein
	18516242	8.54	9.98	-2.72	0.0005	0.0322	col-88	COLlagen
	18505735	9.69	11.1	-2.66	0.0005	0.0325	col-71	COLlagen
	18480443	6.19	5.04	2.22	0.0005	0.033	math-18	MATH (meprin-associated Traf homology) domain containing
	18574887	4.12	5.27	-2.22	0.0005	0.033	lrx-1	LRP X(cross)-hybridizing
	18614769	6.88	7.92	-2.05	0.0005	0.033	grd-14	GRounDhog (hedgehog-like family)
	18608626	7.37	8.85	-2.79	0.0005	0.033	pes-8	Patterned Expression Site
	18463990	7.05	9.03	-3.95	0.0005	0.0331	ZK1025.2; ZK1025.8	hypothetical protein
	18477431	7.05	9.03	-3.95	0.0005	0.0331	ZK1025.2; ZK1025.8	hypothetical protein
	18486907	6.21	7.81	-3.04	0.0005	0.0331	M195.2	hypothetical protein
	18491567	5.4	6.8	-2.64	0.0005	0.0331	lgc-27	Ligand-Gated ion Channel
	18593676	5.46	4.45	2.01	0.0005	0.0331	M162.7	hypothetical protein
	18594291	6.22	7.35	-2.18	0.0005	0.0331	R10D12.1	hypothetical protein
	18611456	3.5	6.03	-5.78	0.0005	0.0331	kreg-1	Kgb-1(KGB-1) REgulated Genes
	18456760	6.33	7.33	-2	0.0006	0.0332	F55H12.2	hypothetical protein
	18475219	5.49	6.91	-2.66	0.0006	0.0332	Y18H1A.9	hypothetical protein
	18484850	4.68	6.38	-3.24	0.0005	0.0332	F53C3.5	hypothetical protein
	18491005	5.62	6.79	-2.24	0.0006	0.0332	mab-3	Protein male abnormal 3
	18501994	4.47	5.88	-2.66	0.0006	0.0332	R07G3.12	ncRNA
	18504527	10.17	11.72	-2.94	0.0005	0.0332	mlt-8	hypothetical protein
	18548419	6.85	8.29	-2.71	0.0005	0.0332	C06E7.4	hypothetical protein
	18597671	3.34	4.91	-2.96	0.0005	0.0332	W02F12.8	hypothetical protein
	18616168	7.64	9.42	-3.45	0.0006	0.0332	alh-13	Glutamate 5-kinase
	18543104	5.83	6.93	-2.16	0.0006	0.0333	W08E12.3	hypothetical protein
	18615398	5.67	4.53	2.2	0.0006	0.0333
	18478566	6.32	7.95	-3.11	0.0006	0.0337	C04G6.2	hypothetical protein
	18451679	7.19	8.63	-2.72	0.0006	0.034	C15C6.1	hypothetical protein
	18634182	5.22	6.52	-2.47	0.0006	0.0347	ZK678.11	ncRNA
	18587205	6.34	5.27	2.1	0.0006	0.0347	F14H3.3	hypothetical protein
	18498196	8.2	9.34	-2.2	0.0007	0.0355	F26G1.5	hypothetical protein
	18514466	7.79	9.2	-2.65	0.0006	0.0355	R07E5.4	hypothetical protein
	18635423	8.74	7.73	2.01	0.0007	0.0355
	18635425	8.74	7.73	2.01	0.0007	0.0355
	18635427	8.74	7.73	2.01	0.0007	0.0355
	18635429	8.74	7.73	2.01	0.0007	0.0355
	18635431	8.74	7.73	2.01	0.0007	0.0355
	18635433	8.74	7.73	2.01	0.0007	0.0355
	18635435	8.74	7.73	2.01	0.0007	0.0355
	18635437	8.74	7.73	2.01	0.0007	0.0355
	18635439	8.74	7.73	2.01	0.0007	0.0355
	18635445	8.74	7.73	2.01	0.0007	0.0355
	18635473	8.74	7.73	2.01	0.0007	0.0355
	18635535	8.74	7.73	2.01	0.0007	0.0355
	18560844	9.46	11.19	-3.31	0.0007	0.0356	ZK180.6	hypothetical protein
	18601518	4.52	5.89	-2.58	0.0007	0.0361	ZC412.13	ncRNA
	18633603	5.66	7.67	-4.03	0.0007	0.0361	mab-7	Protein male abnormal 7
	18490252	7.31	9.22	-3.77	0.0007	0.0365	ptr-18	PaTched Related family
	18540112	7.08	5.96	2.17	0.0007	0.0365	K03H6.2	hypothetical protein
	18459067	4.16	5.71	-2.93	0.0007	0.0366	T06G6.6	hypothetical protein
	18487907	6.48	8.53	-4.15	0.0007	0.0366	qua-1	QUAhog (hedgehog related)
	18552080	7.62	9.58	-3.88	0.0007	0.0366	F33D4.6	hypothetical protein
	18570638	4.14	5.41	-2.42	0.0007	0.0366	F52F10.2	hypothetical protein
	18453693	5.03	6.26	-2.36	0.0007	0.0367	D2092.8	hypothetical protein
	18513639	8.59	7.1	2.8	0.0007	0.037	dig-1	DIsplaced Gonad
	18626210	8.17	9.9	-3.32	0.0007	0.0373	F46C8.8	hypothetical protein
	18466046	4.4	5.88	-2.79	0.0007	0.0375	C34G6.11	ncRNA
	18462659	6.31	7.9	-3.01	0.0007	0.0375	col-48	COLlagen
	18631470	5.92	7.09	-2.25	0.0007	0.0376	col-41	COLlagen
	18481012	5.14	6.23	-2.13	0.0007	0.0377	C56C10.4	hypothetical protein
	18463671	7.14	8.15	-2.02	0.0008	0.0377	Y95B8A.2	hypothetical protein
	18467264	5.52	6.72	-2.3	0.0008	0.0377	pqn-26	Prion-like-(Q/N-rich)-domain-bearing protein
	18506305	6.16	5.08	2.12	0.0008	0.038	Y54G9A.4	hypothetical protein
	18511161	5.63	4.61	2.03	0.0008	0.0382	F23F12.3	hypothetical protein
	18474429	4.43	5.46	-2.04	0.0008	0.0382	W10C8.3	hypothetical protein
	18555172	6.1	7.3	-2.3	0.0008	0.0384	R09E10.2	hypothetical protein
	18491992	8.29	9.85	-2.96	0.0008	0.0386	rol-8	Cuticle collagen 6
	18619282	6	7.24	-2.36	0.0008	0.039	C05G5.7	hypothetical protein
	18474497	6.07	7.21	-2.21	0.0008	0.0394	W10D5.4	ncRNA
	18575986	6.72	8.28	-2.95	0.0008	0.0394	T16G1.2	hypothetical protein
	18478312	6.94	8.73	-3.45	0.0009	0.0395	sqt-2	SQuaT
	18485564	6.08	7.36	-2.43	0.0009	0.0395	F59B10.3	hypothetical protein
	18481376	8.45	10.77	-5.01	0.0009	0.0395	E01G4.6	hypothetical protein
	18500824	5.14	6.48	-2.53	0.0009	0.0399	K02A2.5	hypothetical protein
	18627323	6.43	7.56	-2.2	0.0009	0.0401	F53H4.3	hypothetical protein
	18556483	4.45	6.13	-3.19	0.0009	0.0408	dpy-20	Protein dumpy-20
	18603637	6.14	4.67	2.78	0.0009	0.0408	C11E4.7	hypothetical protein
	18468662	10.57	12.21	-3.12	0.0009	0.0408	dpy-5	Cuticle collagen dpy-5
	18490513	6.77	7.8	-2.04	0.0009	0.0408	Y46G5A.36	hypothetical protein
	18511676	6.79	7.96	-2.26	0.0009	0.0411	F37A8.5	Protein yippee-like F37A8.5
	18486620	5.37	6.68	-2.48	0.0009	0.0411	M02G9.1	hypothetical protein
	18550023	4.91	6.06	-2.22	0.0009	0.0413	C45G7.13; cdh-10	hypothetical protein; CaDHerin family
	18473264	5.2	6.23	-2.04	0.001	0.0421	T20F5.4	hypothetical protein
	18475771	8.81	7.64	2.24	0.001	0.0421	lpd-3	LiPid Depleted
	18489190	5.39	6.95	-2.95	0.001	0.0421	T26C5.2	hypothetical protein
	18491953	5.73	7.64	-3.77	0.001	0.0421	wrt-1	Warthog protein 1 N-product
	18498462	8.14	9.67	-2.88	0.001	0.0421	moe-3	see oma
	18529171	6.9	8.35	-2.73	0.001	0.0421	Y39A1A.9	hypothetical protein
	18571693	3.98	5.4	-2.68	0.001	0.0421	F58H1.2	hypothetical protein
	18571734	6.1	7.25	-2.23	0.001	0.0421	dgat-2	acyl-CoA:DiacylGlycerol AcylTransferase
	18595523	5.57	6.79	-2.33	0.001	0.0421	cgt-1	Ceramide glucosyltransferase 1
	18604729	6.25	7.84	-3.01	0.001	0.0421	C25F6.7	hypothetical protein
	18613096	4.42	5.44	-2.04	0.001	0.0421	K07E3.9	hypothetical protein
	18617029	6.39	5.14	2.37	0.001	0.0421	Y13C8A.1	hypothetical protein
	18622000	8.94	10.29	-2.55	0.001	0.0421	C49F8.3	hypothetical protein
	18624665	7.54	9.25	-3.27	0.001	0.0421	F26A10.2	hypothetical protein
	18635153	5.38	4.13	2.39	0.001	0.0421
	18575315	6.94	8.25	-2.48	0.001	0.0423	bus-19	hypothetical protein
	18494757	4.84	6.49	-3.14	0.001	0.0425	C23H3.9	hypothetical protein
	18494406	4.44	6.85	-5.31	0.0011	0.043	acdh-2	Acyl CoA DeHydrogenase
	18560391	2.99	4.02	-2.03	0.0011	0.043	pqn-90	Prion-like-(Q/N-rich)-domain-bearing protein
	18464574	6.79	8.04	-2.37	0.0011	0.0431	B0205.13	hypothetical protein
	18527805	8.15	9.91	-3.39	0.0011	0.0431	T19C3.2	hypothetical protein
	18579402	6	7.24	-2.36	0.0011	0.0431
	18617899	7.8	9.24	-2.71	0.0011	0.0432	ZK154.1	hypothetical protein
	18627658	5.01	6.67	-3.16	0.0011	0.0437	F56C3.9	hypothetical protein
	18616248	7.82	9.87	-4.14	0.0011	0.0439	bus-8	hypothetical protein
	18477439	6.11	8.55	-5.44	0.0011	0.0442	ZK1025.3	hypothetical protein
	18561090	9.64	8.33	2.47	0.0011	0.0446	unc-22	Twitchin
	18500537	8.82	10.93	-4.32	0.0012	0.0447	bli-2	BLIstered cuticle
	18511291	7.99	6.69	2.47	0.0012	0.0448	cdh-4	Cadherin-4
	18598030	7.29	5.82	2.77	0.0012	0.0452	ttn-1	TiTiN family
	18623059	7.69	9.66	-3.91	0.0012	0.0454	mlt-9	hypothetical protein
	18521602	6.42	7.63	-2.32	0.0012	0.0455	C23G10.6	UDP-glucuronosyltransferase
	18520709	4.7	5.82	-2.17	0.0012	0.0457	C05B5.8	hypothetical protein
	18484657	5.82	7.91	-4.25	0.0012	0.046	F49C5.11	hypothetical protein
	18528939	7.83	6.82	2.01	0.0013	0.0466	Y32H12A.8	hypothetical protein
	18609993	6.23	7.83	-3.03	0.0013	0.0467	F40E10.5	hypothetical protein
	18512736	3.96	5.02	-2.09	0.0013	0.0471	F56D2.3	hypothetical protein
	18606082	8.81	9.84	-2.05	0.0013	0.0476	sym-1	hypothetical protein
	18623200	6.1	8.07	-3.92	0.0013	0.0487	F09F9.2	hypothetical protein
	18523562	5.19	6.54	-2.55	0.0013	0.0487	F26A1.9	hypothetical protein
	18580508	6.2	4.72	2.78	0.0014	0.049	ZC116.3	Probable cubilin
	18608979	4.9	6.64	-3.34	0.0014	0.0492	F22F4.1	hypothetical protein
	18619658	5.77	7.47	-3.26	0.0014	0.0496	C11H1.5	hypothetical protein
	18489516	4.42	5.46	-2.07	0.0014	0.05	mltn-3	MLt-TeN (mlt-10) related
