# Supplementary material for: Transcriptomic Analysis Reveals JAK2/MPL-Independent Effects of Calreticulin Mutations in a C. elegans Model
Source: Cells. 2023 Jan 2;12(1):186. doi: 10.3390/cells12010186 (PMC9818371; doi:10.3390/cells12010186)
Supplement: Supplementary file 1 [file cells-12-00186-s001.zip › Table S6.xlsx]

## Sheet: Hoja1
	Table S6. Results of microarray analysis when comparing CRT-1(mut2) vs CRT-1(KO)
	ID	CRT-1(mut2) Avg (log2)	CRT-1(KO) Avg (log2)	Fold Change	P-val	FDR P-val	Gene Symbol	Description
	18598977	11.34	6.41	30.49	3.56e-13	1.01e-08	crt-1	Calreticulin
	18635457	2.57	7.68	-34.43	1.72e-11	2.45e-07
	18490831	4.5	7.47	-7.83	1.57e-08	0.0001	Y51B9A.12	ncRNA
	18556853	9	10.59	-3.01	2.72e-08	0.0002	pqn-74	Prion-like-(Q/N-rich)-domain-bearing protein
	18594507	6.32	8.94	-6.14	2.78e-08	0.0002	R12A1.3	hypothetical protein
	18573737	7.83	10.22	-5.23	1.3e-07	0.0006	R02F11.1	hypothetical protein
	18476062	7.15	5.26	3.71	1.89e-07	0.0007	haf-6	HAlF transporter (PGP related)
	18575180	4.21	5.46	-2.38	1.7e-07	0.0007	T06E4.14	hypothetical protein
	18540357	5.65	3.88	3.42	2.07e-07	0.0007	fmo-2	Dimethylaniline monooxygenase [N-oxide-forming]
	18481652	5.75	7.6	-3.61	2.48e-07	0.0007	F07H5.8	hypothetical protein
	18558393	10.21	12.7	-5.62	2.8e-07	0.0007	dpy-4	DumPY: shorter than wild-type
	18488051	6.32	7.58	-2.39	4.31e-07	0.0007	T06D8.3	hypothetical protein
	18556434	4.55	5.73	-2.26	3.85e-07	0.0007	dpy-9	DumPY: shorter than wild-type
	18557521	8.21	10.22	-4.03	4.86e-07	0.0007	col-120	COLlagen
	18619060	6.67	4.52	4.43	4.78e-07	0.0007	C04E7.3	hypothetical protein
	18619063	5.53	4.03	2.83	4.43e-07	0.0007	C04E7.4	hypothetical protein
	18575177	7.06	8.97	-3.77	4.68e-07	0.0007	pqn-63	Prion-like-(Q/N-rich)-domain-bearing protein
	18560836	9.01	11.33	-5	4.59e-07	0.0007	ZK180.5	hypothetical protein
	18491360	9.86	12.38	-5.77	4.63e-07	0.0007	rol-1	ROLler: helically twisted, animals roll when moving
	18577326	6.44	9.45	-8.01	5.21e-07	0.0007	mlt-11; W01F3.4	hypothetical protein; ncRNA
	18567238	10.38	8.09	4.91	1.18e-06	0.0008	pud-1.2; pud-1.1	Protein Up-regulated in Daf-2(gf)
	18588830	4.42	5.81	-2.62	1.21e-06	0.0008	F29G9.14	ncRNA
	18592238	6.42	7.96	-2.91	1.13e-06	0.0008	H19N07.3	hypothetical protein
	18458679	3.5	5.58	-4.23	8.07e-07	0.0008	R12E2.14	hypothetical protein
	18476090	7.51	9.3	-3.48	6.65e-07	0.0008	Y48G8AL.16	hypothetical protein
	18506823	8.36	10.23	-3.66	8.82e-07	0.0008	abu-14	Activated in Blocked Unfolded protein response
	18620842	5.38	7.6	-4.67	7.55e-07	0.0008	dpy-8	DumPY: shorter than wild-type
	18497340	9.13	11.44	-4.97	6.34e-07	0.0008	col-73	COLlagen
	18622280	4.47	6.46	-3.99	6.74e-07	0.0008	lgx-1	Lin-12 and Glp-1 X-hybridizing
	18476583	8.83	10.96	-4.38	9.69e-07	0.0008	grl-16	GRound-Like (grd related)
	18570978	7.47	5.56	3.76	7.84e-07	0.0008	lipl-1	Lipase
	18537444	8.33	10.78	-5.47	9.67e-07	0.0008	dpy-13	Cuticle collagen dpy-13
	18505906	9.19	11.29	-4.29	1.12e-06	0.0008	Y51H7C.13	hypothetical protein
	18534341	10.25	9.2	2.06	6.78e-07	0.0008	spp-8	SaPosin-like Protein family
	18561526	5.91	6.91	-2	8.16e-07	0.0008	nlp-30	GMW-amide
	18634347	8.58	12.6	-16.3	1.17e-06	0.0008
	18634353	8.58	12.6	-16.3	1.17e-06	0.0008
	18634359	8.58	12.6	-16.3	1.17e-06	0.0008
	18634365	8.58	12.6	-16.3	1.17e-06	0.0008
	18634371	8.58	12.6	-16.3	1.17e-06	0.0008
	18634381	8.58	12.6	-16.3	1.17e-06	0.0008
	18634449	8.58	12.6	-16.3	1.17e-06	0.0008
	18634453	8.58	12.6	-16.3	1.17e-06	0.0008
	18634461	8.58	12.6	-16.3	1.17e-06	0.0008
	18616817	7.18	10.09	-7.52	1.29e-06	0.0008	lpr-3	LiPocalin-Related protein
	18546366	8.1	9.95	-3.6	1.43e-06	0.0009	bli-6	BLIstered cuticle
	18598700	10.01	7.82	4.55	1.5e-06	0.0009	pud-1.2; pud-1.1	Protein Up-regulated in Daf-2(gf)
	18616740	5.96	8.12	-4.47	1.47e-06	0.0009	lpr-6	LiPocalin-Related protein
	18553423	9.03	11.03	-3.99	1.54e-06	0.0009	col-104	COLlagen
	18533547	3.36	4.64	-2.42	1.87e-06	0.0011	C09G12.5	hypothetical protein
	18492437	7.11	5.96	2.22	2.02e-06	0.0011	ZK673.1	hypothetical protein
	18476075	10.46	11.83	-2.59	2.08e-06	0.0011	Y48G8AL.12	hypothetical protein
	18462850	6.62	9.38	-6.81	2.24e-06	0.0012	Y65B4BL.1	hypothetical protein
	18498633	4.03	5.45	-2.68	2.43e-06	0.0012	F33H12.7	hypothetical protein
	18497465	8.01	10.45	-5.42	2.41e-06	0.0012	F13H8.5	hypothetical protein
	18575832	8.42	10.7	-4.86	2.48e-06	0.0012	col-157	COLlagen
	18622639	6.16	8.41	-4.76	2.55e-06	0.0012	dpy-3	DumPY: shorter than wild-type
	18485735	2.87	5.64	-6.79	2.63e-06	0.0013	F59H6.3	hypothetical protein
	18550457	8.65	11.09	-5.43	2.71e-06	0.0013	col-138	COLlagen
	18574047	7.61	9.11	-2.84	2.76e-06	0.0013	pqn-54	Prion-like-(Q/N-rich)-domain-bearing protein
	18582284	8.02	6.94	2.12	2.73e-06	0.0013	lys-7	LYSozyme
	18518039	5	7	-4.01	2.83e-06	0.0013	Y53G8AR.10	ncRNA
	18512989	3.23	4.73	-2.84	2.93e-06	0.0013	F59B2.12	hypothetical protein
	18564387	5.24	6.59	-2.54	2.9e-06	0.0013	zip-5	bZIP transcription factor family
	18573043	5.43	7.23	-3.49	3.26e-06	0.0014	K09D9.1	hypothetical protein
	18560844	8.36	11.19	-7.11	3.34e-06	0.0014	ZK180.6	hypothetical protein
	18534810	10.67	12.17	-2.84	3.75e-06	0.0016	col-107	COLlagen
	18499587	9.11	7.99	2.16	3.81e-06	0.0016	F46C5.1	hypothetical protein
	18483045	8.82	7.8	2.03	4.6e-06	0.0018	F27E5.1	hypothetical protein
	18568239	6.7	8.08	-2.59	4.58e-06	0.0018	asns-1	Asparagine synthetase
	18531521	5.99	8.33	-5.07	4.6e-06	0.0018	col-97	COLlagen
	18497331	7.96	10.39	-5.42	4.42e-06	0.0018	col-17	COLlagen
	18620962	7.89	9.55	-3.17	4.86e-06	0.0018	lgc-21	Ligand-Gated ion Channel
	18567935	9.65	12.29	-6.22	4.87e-06	0.0018	sqt-3	Cuticle collagen 1
	18592103	6.78	8.47	-3.22	4.99e-06	0.0019	clec-229	C-type LECtin
	18550679	6.69	8.29	-3.03	5.26e-06	0.0019	D2096.6	hypothetical protein
	18466050	8.27	10.73	-5.49	5.41e-06	0.002	noah-1	NOmpA Homolog (Drosophila nompA: no mechanoreceptor potential A)
	18578657	4.6	6.04	-2.71	5.78e-06	0.002	Y39B6A.27	hypothetical protein
	18613758	6.78	8.53	-3.35	5.82e-06	0.002	M153.1	hypothetical protein
	18476956	8.46	11.04	-5.99	5.61e-06	0.002	Y71G12B.25	hypothetical protein
	18518646	6.02	8.12	-4.27	5.66e-06	0.002	cdh-12	CaDHerin family
	18524875	6.43	7.52	-2.13	5.72e-06	0.002	F56F11.7	ncRNA
	18616764	6.94	9.35	-5.32	5.96e-06	0.002	lpr-4	LiPocalin-Related protein
	18501709	6.68	8	-2.51	6.1e-06	0.002	R03C1.1	hypothetical protein
	18606946	4.91	6.51	-3.03	6.27e-06	0.0021	E01G6.1	hypothetical protein
	18505735	8.96	11.1	-4.41	6.39e-06	0.0021	col-71	COLlagen
	18567241	10.55	8.7	3.62	6.87e-06	0.0021	pud-2.2; pud-2.1	Protein Up-regulated in Daf-2(gf)
	18587324	10.55	8.7	3.62	6.87e-06	0.0021	pud-2.2; pud-2.1	Protein Up-regulated in Daf-2(gf)
	18507003	6.36	8.56	-4.61	6.98e-06	0.0021	wrt-10	WaRThog (hedgehog-like family)
	18467576	8.87	10.75	-3.68	6.64e-06	0.0021	F10D11.6	hypothetical protein
	18571589	4.27	5.34	-2.1	6.97e-06	0.0021	F58E6.13	hypothetical protein
	18492525	9.09	11.12	-4.08	6.94e-06	0.0021	ZK84.1	hypothetical protein
	18546147	6.51	5.17	2.53	7.5e-06	0.0022	smf-3	yeast SMF (divalent cation transporter) homolog
	18619451	4.31	7.71	-10.61	7.87e-06	0.0023	C09B8.4	hypothetical protein
	18499262	8.45	10.05	-3.03	8.22e-06	0.0024	msra-1	Methionine Sulfoxide Reductase A
	18627216	8.34	11.43	-8.5	8.43e-06	0.0024	F53B1.4	hypothetical protein
	18538726	8.19	10.56	-5.15	8.66e-06	0.0024	noah-2	NOmpA Homolog (Drosophila nompA: no mechanoreceptor potential A)
	18493140	7.25	10.32	-8.4	8.93e-06	0.0024	sqt-1	Cuticle collagen sqt-1
	18490903	8.1	9.74	-3.12	8.85e-06	0.0024	Y51H7C.1	hypothetical protein
	18587041	5.9	6.96	-2.09	8.94e-06	0.0024	F13A7.11	hypothetical protein
	18479063	5.36	7.75	-5.25	9.04e-06	0.0024	C09F9.2	hypothetical protein
	18570305	7.45	5.91	2.89	9.28e-06	0.0025	lipl-2	Lipase
	18472371	8.94	10.31	-2.59	9.49e-06	0.0025	R12E2.7	hypothetical protein
	18543279	7.05	8.2	-2.23	9.58e-06	0.0025	pqn-76; abu-5; pqn-78	Prion-like-(Q/N-rich)-domain-bearing protein; Activated in Blocked Unfolded protein response
	18558023	7.96	9.97	-4.02	9.6e-06	0.0025	col-109	COLlagen
	18616755	6.65	9.2	-5.85	9.76e-06	0.0025	lpr-5	LiPocalin-Related protein
	18517626	5.62	7.34	-3.29	9.87e-06	0.0025	Y47D3B.6	hypothetical protein
	18594465	5.7	4.2	2.83	1.01e-05	0.0025	lipl-3	Lipase
	18478566	5.55	7.95	-5.29	1.05e-05	0.0026	C04G6.2	hypothetical protein
	18612750	5.99	8.01	-4.06	1.09e-05	0.0027	K02E10.4	hypothetical protein
	18501892	8.72	9.95	-2.34	1.17e-05	0.0028	tts-2	ncRNA
	18504527	9.44	11.72	-4.89	1.18e-05	0.0028	mlt-8	hypothetical protein
	18589942	7.17	9.09	-3.79	1.2e-05	0.0028	F41F3.3	hypothetical protein
	18585275	6.8	8.31	-2.85	1.22e-05	0.0028	C49G7.10	hypothetical protein
	18634403	3.92	6.15	-4.68	1.22e-05	0.0028
	18618113	5.98	7.27	-2.44	1.26e-05	0.0029	ZK662.2	hypothetical protein
	18570777	9.58	10.85	-2.41	1.28e-05	0.0029	F53F1.4	hypothetical protein
	18513226	5.21	7.08	-3.65	1.26e-05	0.0029	H19M22.3	hypothetical protein
	18500026	9.27	11.8	-5.75	1.3e-05	0.0029	col-38	COLlagen
	18634405	4.87	6.58	-3.27	1.3e-05	0.0029
	18595207	5.37	7.11	-3.33	1.32e-05	0.0029	T04C12.14	ncRNA
	18481543	6.41	8.22	-3.5	1.32e-05	0.0029	F01D5.6	hypothetical protein
	18596461	7.38	9.53	-4.45	1.36e-05	0.0029	T19A5.3	hypothetical protein
	18520069	5.19	6.66	-2.77	1.35e-05	0.0029	fbn-1	FiBrilliN homolog
	18599234	6.38	5.05	2.52	1.38e-05	0.0029	sws-1	SWS1 homolog
	18480434	10.1	11.63	-2.89	1.39e-05	0.0029	tag-297	hypothetical protein
	18476005	9.56	10.57	-2.01	1.44e-05	0.003	Y48G1BR.1	hypothetical protein
	18595579	5.31	6.7	-2.61	1.45e-05	0.003	T06E4.12	hypothetical protein
	18601975	6.03	7.15	-2.19	1.52e-05	0.0031	lron-2	eLRR (extracellular Leucine-Rich Repeat) ONly
	18487151	4.4	6.42	-4.07	1.54e-05	0.0031	cdh-7	CaDHerin family
	18537273	7.49	5.97	2.88	1.54e-05	0.0031	thn-2	THaumatiN family
	18458043	8.19	10.48	-4.87	1.59e-05	0.0032	col-49	COLlagen
	18471685	9.13	11.01	-3.7	1.66e-05	0.0033	col-65	COLlagen
	18575870	8.76	9.87	-2.16	1.65e-05	0.0033	T15B7.1	hypothetical protein
	18612629	7.96	10.87	-7.52	1.85e-05	0.0036	H42K12.3	hypothetical protein
	18592451	4.49	5.75	-2.39	1.94e-05	0.0037	K01D12.9	hypothetical protein
	18631470	5.4	7.09	-3.23	1.94e-05	0.0037	col-41	COLlagen
	18603195	7.65	9.1	-2.72	2e-05	0.0037	C06G1.1	hypothetical protein
	18510218	7.32	9.02	-3.23	2.02e-05	0.0037	nhr-6	Nuclear Hormone Receptor family
	18521063	8.04	9.25	-2.31	1.98e-05	0.0037	C07A9.9	hypothetical protein
	18472362	9.06	11.11	-4.16	2.13e-05	0.0039	R12E2.15	hypothetical protein
	18459023	6.15	7.78	-3.11	2.13e-05	0.0039	T06A4.3	hypothetical protein
	18486634	5.69	7.12	-2.69	2.2e-05	0.0039	M02G9.2	hypothetical protein
	18550966	8.21	9.79	-2.99	2.17e-05	0.0039	col-130	COLlagen
	18602543	6.54	8.21	-3.17	2.2e-05	0.0039	adt-1	ADAMTS family
	18634189	8.32	10.81	-5.62	2.18e-05	0.0039	wrt-4	Warthog protein 4 N-product
	18578536	7.89	6.85	2.05	2.2e-05	0.0039	smut-1	Synthetic MUTator
	18527786	7.15	9.16	-4.05	2.27e-05	0.004	T17H7.7	hypothetical protein
	18483202	7.33	10.42	-8.52	2.31e-05	0.004	pqn-32	Prion-like-(Q/N-rich)-domain-bearing protein
	18475690	8.18	9.89	-3.26	2.33e-05	0.0041	Y47G6A.15	hypothetical protein
	18621603	7.59	10.16	-5.94	2.53e-05	0.0043	acn-1	Inactive angiotensin-converting enzyme-related protein
	18616168	7.1	9.42	-5	2.54e-05	0.0043	alh-13	Glutamate 5-kinase
	18454469	7.6	8.92	-2.51	2.56e-05	0.0044	col-60	COLlagen
	18544421	5.73	7.24	-2.85	2.58e-05	0.0044	col-115	COLlagen
	18625111	4.82	5.83	-2.01	2.6e-05	0.0044	F35A5.4	hypothetical protein
	18486679	6.06	8	-3.84	2.78e-05	0.0046	dao-2	Dauer or Aging adult Overexpression
	18501994	4.01	5.88	-3.66	2.79e-05	0.0046	R07G3.12	ncRNA
	18562051	7.49	9	-2.85	2.85e-05	0.0046	C02E7.6	hypothetical protein
	18604669	3.99	5.05	-2.08	2.85e-05	0.0046	C25F6.17	ncRNA
	18498949	10.84	11.9	-2.09	2.89e-05	0.0047	ram-2	hypothetical protein
	18521598	5.71	4.29	2.69	3.08e-05	0.0049	C23G10.11	hypothetical protein
	18606070	6.94	8.41	-2.77	3.13e-05	0.005	let-4	Leucine-rich repeat-containing protein let-4
	18543282	5.64	6.7	-2.08	3.28e-05	0.0051
	18592262	6.78	8.92	-4.42	3.24e-05	0.0051	H23N18.5	hypothetical protein
	18626210	7.41	9.9	-5.62	3.26e-05	0.0051	F46C8.8	hypothetical protein
	18507015	7.68	8.94	-2.4	3.26e-05	0.0051	ZK1307.1	hypothetical protein
	18499672	7.2	8.99	-3.44	3.39e-05	0.0051	lin-42	Period protein homolog lin-42
	18481376	7.61	10.77	-8.94	3.38e-05	0.0051	E01G4.6	hypothetical protein
	18490252	6.63	9.22	-6.05	3.45e-05	0.0052	ptr-18	PaTched Related family
	18491992	7.7	9.85	-4.43	3.44e-05	0.0052	rol-8	Cuticle collagen 6
	18582252	4.7	5.9	-2.31	3.43e-05	0.0052	C01G10.5	hypothetical protein
	18510209	2.85	4.75	-3.76	3.52e-05	0.0052	C48B4.12	hypothetical protein
	18601002	5.3	7.81	-5.71	3.73e-05	0.0054	Y75B7AR.1	hypothetical protein
	18571734	5.67	7.25	-3.01	3.71e-05	0.0054	dgat-2	acyl-CoA:DiacylGlycerol AcylTransferase
	18479108	7.09	9.84	-6.73	3.72e-05	0.0054	bli-1	Cuticle collagen bli-1
	18477545	7.96	10.4	-5.43	3.82e-05	0.0055	col-63	COLlagen
	18484657	4.95	7.91	-7.75	3.84e-05	0.0055	F49C5.11	hypothetical protein
	18478954	5.67	6.9	-2.35	3.83e-05	0.0055	C08G5.9	ncRNA
	18582341	5.85	7.5	-3.13	3.93e-05	0.0056	C02E7.7	hypothetical protein
	18561566	3.13	4.43	-2.46	4.16e-05	0.0058	B0222.10	hypothetical protein
	18463443	4.88	6.67	-3.45	4.16e-05	0.0058	Y73E7A.8	hypothetical protein
	18529171	6.36	8.35	-3.97	4.14e-05	0.0058	Y39A1A.9	hypothetical protein
	18476096	5.27	6.48	-2.32	4.26e-05	0.0059	grh-1	GRainyHead (Drosophila transcription factor) homolog
	18593243	7.94	8.94	-2	4.28e-05	0.0059	odc-1	Ornithine decarboxylase
	18576006	8.85	10.19	-2.54	4.36e-05	0.006	grd-6	GRounDhog (hedgehog-like family)
	18628851	7.99	9.3	-2.47	4.39e-05	0.006	dao-3	Dauer or Aging adult Overexpression
	18634407	4.23	5.32	-2.13	4.43e-05	0.006
	18627064	5.55	8.16	-6.08	4.56e-05	0.0061	wrt-2	WaRThog (hedgehog-like family)
	18593566	4.62	6.25	-3.1	4.57e-05	0.0061	M03E7.4	hypothetical protein
	18592473	5.87	8.1	-4.68	4.51e-05	0.0061	K02E11.10	hypothetical protein
	18614358	5.59	8.08	-5.61	4.63e-05	0.0061	R07E3.6	hypothetical protein
	18494685	4.9	6	-2.13	4.66e-05	0.0062	C18E9.7	hypothetical protein
	18588358	3.51	4.53	-2.03	4.74e-05	0.0062	try-8	TRYpsin-like protease
	18616248	7.06	9.87	-7.01	4.75e-05	0.0062	bus-8	hypothetical protein
	18626196	4	5.31	-2.49	4.81e-05	0.0063	dpy-7	Cuticle collagen dpy-7
	18629545	4.32	5.54	-2.33	4.84e-05	0.0063	M03B6.3	hypothetical protein
	18528133	6.71	8.14	-2.7	4.89e-05	0.0063	T24C4.4	hypothetical protein
	18552080	7.14	9.58	-5.41	4.91e-05	0.0063	F33D4.6	hypothetical protein
	18532321	4.57	3.52	2.07	4.88e-05	0.0063	fbxa-6	F-box A protein
	18635545	10.43	9.35	2.11	5.11e-05	0.0065
	18488624	5.73	7.41	-3.2	5.16e-05	0.0065	dpy-2	Cuticle collagen dpy-2
	18572509	5.5	7.12	-3.08	5.24e-05	0.0066	swt-5	SWEET sugar transporter family
	18464121	8.13	9.2	-2.1	5.28e-05	0.0066	ptr-23	PaTched Related family
	18479048	6.58	9.4	-7.08	5.36e-05	0.0066	mlt-10	hypothetical protein
	18520530	6.69	8.4	-3.26	5.52e-05	0.0068	agmo-1	Alkylglycerol monooxygenase homolog
	18568934	5.39	6.58	-2.28	5.64e-05	0.0069	F32D8.3	hypothetical protein
	18635179	9.15	7.8	2.56	6.05e-05	0.0073
	18617899	7.36	9.24	-3.68	6.08e-05	0.0073	ZK154.1	hypothetical protein
	18514466	7.39	9.2	-3.5	6.22e-05	0.0074	R07E5.4	hypothetical protein
	18631333	5.64	4.55	2.12	6.28e-05	0.0075	spp-2	SaPosin-like Protein family
	18602296	7.17	9.48	-4.97	6.37e-05	0.0076	wrt-9	WaRThog (hedgehog-like family)
	18478312	6.35	8.73	-5.19	6.44e-05	0.0076	sqt-2	SQuaT
	18561415	6.58	7.64	-2.09	6.57e-05	0.0077	pqn-2	Prion-like-(Q/N-rich)-domain-bearing protein
	18617617	4.36	7.22	-7.29	6.63e-05	0.0078	dao-4	Dauer or Aging adult Overexpression
	18633010	5.65	7.99	-5.04	6.78e-05	0.0078	Y102A11A.5	hypothetical protein
	18609993	5.69	7.83	-4.41	6.79e-05	0.0078	F40E10.5	hypothetical protein
	18626959	6.54	9.07	-5.78	6.75e-05	0.0078	abu-12	Activated in Blocked Unfolded protein response
	18483062	5.25	7.19	-3.84	6.86e-05	0.0078	phg-1	Growth arrest-specific protein 1 homolog
	18607574	7.92	9.23	-2.47	7.01e-05	0.008	dhs-25	DeHydrogenases, Short chain
	18608626	7.05	8.85	-3.48	7.19e-05	0.0081	pes-8	Patterned Expression Site
	18486620	5.08	6.68	-3.03	7.18e-05	0.0081	M02G9.1	hypothetical protein
	18494326	6.22	8.9	-6.41	7.14e-05	0.0081	skpo-2	ShK domain and PerOxidase domain containing protein
	18539028	8.68	7.54	2.21	7.27e-05	0.0081	F55G11.4	hypothetical protein
	18512220	8.39	9.69	-2.45	7.43e-05	0.0082	lon-1	LONg
	18463737	5.74	8.29	-5.85	7.66e-05	0.0084	ZC123.1	hypothetical protein
	18487591	5.2	7.66	-5.48	7.64e-05	0.0084	T01B7.13	hypothetical protein
	18462659	5.95	7.9	-3.88	7.76e-05	0.0084	col-48	COLlagen
	18490770	5.26	6.93	-3.18	8.03e-05	0.0086	Y49F6B.15	ncRNA
	18617910	6.51	9.05	-5.78	8e-05	0.0086	wrt-6	Warthog protein 6
	18463990	6.73	9.03	-4.93	8.36e-05	0.0088	ZK1025.2; ZK1025.8	hypothetical protein
	18477431	6.73	9.03	-4.93	8.36e-05	0.0088	ZK1025.2; ZK1025.8	hypothetical protein
	18553700	7.57	6.43	2.2	8.55e-05	0.009	H09I01.4	ncRNA
	18477357	4.22	6.28	-4.19	8.73e-05	0.009	ZC434.10; ZC434.3	hypothetical protein
	18635261	9.43	8.34	2.12	8.69e-05	0.009
	18621174	8.53	10.28	-3.37	8.9e-05	0.0091	col-175	COLlagen
	18500445	6	8.18	-4.52	8.92e-05	0.0091	lips-9	LIPaSe related
	18635645	4.94	3.68	2.38	9e-05	0.0092
	18580845	6.49	5.42	2.09	9.37e-05	0.0094	ugt-18	UDP-glucuronosyltransferase
	18493035	4.08	5.63	-2.93	9.66e-05	0.0096	B0432.16	ncRNA
	18506618	6.15	7.91	-3.4	9.75e-05	0.0096	ZC101.1	hypothetical protein
	18604780	6.6	8.38	-3.42	0.0001	0.0098	C26B9.3	hypothetical protein
	18486907	5.97	7.81	-3.58	0.0001	0.0098	M195.2	hypothetical protein
	18535775	4.67	6.4	-3.3	0.0001	0.0098	C52D10.3	hypothetical protein
	18495360	7.67	8.69	-2.02	0.0001	0.0098	shn-1	SHaNk (SH3/ankyrin domain scaffold protein) related
	18633603	5.29	7.67	-5.2	0.0001	0.0099	mab-7	Protein male abnormal 7
	18487907	6.13	8.53	-5.29	0.0001	0.0099	qua-1	QUAhog (hedgehog related)
	18553974	4.52	5.64	-2.17	0.0001	0.01	K03D3.5	hypothetical protein
	18477439	5.66	8.55	-7.42	0.0001	0.01	ZK1025.3	hypothetical protein
	18576093	7.72	9.52	-3.48	0.0001	0.0102	T19B10.2	hypothetical protein
	18617869	5.38	6.49	-2.15	0.0001	0.0103	ZC8.7	ncRNA
	18563092	5.78	7.45	-3.19	0.0001	0.0104	srr-6	Serpentine Receptor, class R
	18481211	8.41	9.52	-2.15	0.0001	0.0104	pyr-1	PYRimidine biosynthesis
	18485341	8.77	10.81	-4.1	0.0001	0.0105	F56D3.1	hypothetical protein
	18634387	3.95	5.86	-3.77	0.0001	0.0105
	18582082	3.49	4.84	-2.56	0.0001	0.0107	B0365.9	hypothetical protein
	18583523	6.33	8.58	-4.75	0.0001	0.0107	pqn-13	Prion-like-(Q/N-rich)-domain-bearing protein
	18635129	8.52	10.18	-3.17	0.0001	0.0108
	18588591	7.87	9.37	-2.83	0.0001	0.0109	F26F2.10	hypothetical protein
	18523700	5.23	7.51	-4.86	0.0001	0.0109	F30H5.3	hypothetical protein
	18534521	6.81	8.34	-2.9	0.0001	0.011	C30H6.5	hypothetical protein
	18596788	6.39	5.11	2.43	0.0001	0.011	T22F3.11	hypothetical protein
	18623059	7.25	9.66	-5.32	0.0001	0.0111	mlt-9	hypothetical protein
	18468662	9.92	12.21	-4.87	0.0001	0.0111	dpy-5	Cuticle collagen dpy-5
	18466869	5.08	6.31	-2.35	0.0001	0.0113	C54G4.4	hypothetical protein
	18492884	7.78	8.99	-2.32	0.0001	0.0113	B0286.3	Phosphoribosylaminoimidazole carboxylase
	18568946	7.88	8.9	-2.02	0.0001	0.0115	F32D8.7	hypothetical protein
	18524946	6.22	8.64	-5.35	0.0001	0.0115	abu-13	Activated in Blocked Unfolded protein response
	18581627	6.18	7.32	-2.21	0.0001	0.0116	abu-1	Activated in Blocked Unfolded protein response
	18623200	5.78	8.07	-4.88	0.0001	0.0118	F09F9.2	hypothetical protein
	18481012	4.95	6.23	-2.43	0.0001	0.0119	C56C10.4	hypothetical protein
	18453693	4.88	6.26	-2.62	0.0001	0.012	D2092.8	hypothetical protein
	18524961	7.1	8.39	-2.45	0.0001	0.012	gei-13	Gex-3-interacting protein 13
	18483576	6.27	7.6	-2.51	0.0001	0.012	pqn-35	Prion-like-(Q/N-rich)-domain-bearing protein
	18624665	7.13	9.25	-4.34	0.0001	0.0121	F26A10.2	hypothetical protein
	18621832	6.33	9.05	-6.57	0.0001	0.0121	ptr-4	PaTched Related family
	18527805	7.82	9.91	-4.25	0.0002	0.0122	T19C3.2	hypothetical protein
	18599926	4.93	7.35	-5.38	0.0002	0.0122	grl-5	GRound-Like (grd related)
	18457277	7.9	9.98	-4.23	0.0002	0.0123	F58H10.1	hypothetical protein
	18496809	5.55	7.49	-3.85	0.0002	0.0124	F01D5.10	hypothetical protein
	18494406	4.03	6.85	-7.09	0.0002	0.0127	acdh-2	Acyl CoA DeHydrogenase
	18525630	6.12	8.31	-4.54	0.0002	0.0128	K04H4.2	hypothetical protein
	18566485	7.32	6.13	2.28	0.0002	0.0128	F08H9.14	ncRNA
	18616634	7.38	9	-3.06	0.0002	0.0128	pat-9	Paralysed Arrest at Two-fold
	18472323	7.38	8.94	-2.94	0.0002	0.0128	suro-1	SUPpressor of ROller
	18476569	5.45	6.61	-2.23	0.0002	0.0129	Y65B4BL.6	hypothetical protein
	18491953	5.35	7.64	-4.9	0.0002	0.0129	wrt-1	Warthog protein 1 N-product
	18625685	5.79	7.68	-3.7	0.0002	0.0129	col-173	COLlagen
	18575986	6.48	8.28	-3.48	0.0002	0.013	T16G1.2	hypothetical protein
	18473264	5.04	6.23	-2.29	0.0002	0.0132	T20F5.4	hypothetical protein
	18552934	8.14	6.99	2.21	0.0002	0.0132	F49F1.5	hypothetical protein
	18634361	4.06	5.75	-3.23	0.0002	0.0135
	18530790	5.26	7.57	-4.97	0.0002	0.0137	grl-15	GRound-Like (grd related)
	18578760	5.1	6.2	-2.14	0.0002	0.0137	Y39B6A.9	hypothetical protein
	18465867	8.07	9.18	-2.17	0.0002	0.0137	sem-2	hypothetical protein
	18628661	4.3	5.37	-2.1	0.0002	0.0137	K03C7.6	ncRNA
	18619658	5.42	7.47	-4.13	0.0002	0.0139	C11H1.5	hypothetical protein
	18606082	8.59	9.84	-2.38	0.0002	0.0141	sym-1	hypothetical protein
	18503278	3.71	4.76	-2.07	0.0002	0.0144	lips-11	LIPaSe related
	18466046	4.14	5.88	-3.35	0.0002	0.0145	C34G6.11	ncRNA
	18614817	5.67	7.23	-2.93	0.0002	0.0145	T01B6.1	hypothetical protein
	18491005	5.59	6.79	-2.3	0.0002	0.0146	mab-3	Protein male abnormal 3
	18615398	5.89	4.53	2.56	0.0002	0.0147
	18500537	8.45	10.93	-5.55	0.0002	0.0147	bli-2	BLIstered cuticle
	18609707	6.87	8.3	-2.68	0.0002	0.0148	F38B6.4	hypothetical protein
	18634086	5.42	7.37	-3.86	0.0002	0.0148	ZK470.6	hypothetical protein
	18619282	6.07	7.24	-2.26	0.0002	0.0151	C05G5.7	hypothetical protein
	18614749	5.72	7.13	-2.65	0.0002	0.0151	R57.2	hypothetical protein
	18502847	7.14	9.36	-4.65	0.0002	0.0152	T06D8.10	hypothetical protein
	18597354	7.21	8.62	-2.67	0.0002	0.0152	zip-10	bZIP transcription factor family
	18490715	4.41	5.68	-2.41	0.0002	0.0153	Y48E1B.8	hypothetical protein
	18611039	4.73	6.9	-4.49	0.0002	0.0153	F49E10.2	hypothetical protein
	18569391	7.46	8.49	-2.04	0.0002	0.0156	pha-4	Defective pharyngeal development protein 4
	18543570	6.74	5.5	2.37	0.0002	0.0156	flh-3	FLYWCH zinc finger transcription factor homolog
	18483605	3.52	4.76	-2.37	0.0002	0.0157	F35D2.1	hypothetical protein
	18591546	5.94	7.49	-2.92	0.0002	0.0158	col-156	COLlagen
	18543113	6.81	7.94	-2.19	0.0003	0.0158	W08E12.5; W08E12.4	hypothetical protein
	18490513	6.73	7.8	-2.1	0.0003	0.0158	Y46G5A.36	hypothetical protein
	18498462	7.99	9.67	-3.2	0.0003	0.0158	moe-3	see oma
	18452187	5.41	7.12	-3.27	0.0002	0.0158	C30F8.3	hypothetical protein
	18463981	3.67	5.73	-4.17	0.0002	0.0158	bah-1	Biofilm Absent on Head (after Yersinia exposure)
	18515612	4.59	6.13	-2.9	0.0002	0.0158	T17H7.1	hypothetical protein
	18516638	6.33	7.41	-2.11	0.0003	0.0158	Y22D7AR.16	ncRNA
	18612347	6.02	8.44	-5.35	0.0003	0.0158	H03E18.1	hypothetical protein
	18632566	8.05	9.56	-2.86	0.0002	0.0158	T27A10.6	hypothetical protein
	18454617	8.13	9.25	-2.18	0.0003	0.0158	blmp-1	B lymphocyte-induced maturation protein 1 homolog
	18491394	6.47	8.43	-3.89	0.0003	0.0158	Y57A10A.23	hypothetical protein
	18629818	6.26	7.67	-2.65	0.0003	0.0158	R02E4.3	hypothetical protein
	18548419	6.87	8.29	-2.67	0.0003	0.0158	C06E7.4	hypothetical protein
	18535969	6.53	7.87	-2.53	0.0003	0.0159	atic-1	5-Aminoimidazole-4-carboxamide ribonucleotide formylTransferase/IMP Cyclohydrolase homolog
	18550023	4.78	6.06	-2.42	0.0003	0.0159	C45G7.13; cdh-10	hypothetical protein; CaDHerin family
	18627323	6.33	7.56	-2.35	0.0003	0.016	F53H4.3	hypothetical protein
	18454813	6.32	7.53	-2.31	0.0003	0.016	col-58	COLlagen
	18475219	5.53	6.91	-2.6	0.0003	0.0162	Y18H1A.9	hypothetical protein
	18622427	8.41	9.42	-2.02	0.0003	0.0163	cebp-1	C/EBP (CCAAT/enhancer-binding protein) homolog
	18487612	6.01	8.04	-4.08	0.0003	0.0165	rol-6	Cuticle collagen rol-6
	18505351	5.59	4.52	2.11	0.0003	0.0167	tig-3	TransformIng Growth factor beta family
	18576575	5.46	4.25	2.31	0.0003	0.0168	wago-10	Piwi-like protein
	18472367	6.01	7.37	-2.56	0.0003	0.0168	R12E2.6	hypothetical protein
	18567233	4.85	3.81	2.05	0.0003	0.0169	pud-4	Protein Up-regulated in Daf-2(gf)
	18607902	3.26	4.29	-2.05	0.0003	0.0169	F13B9.2	hypothetical protein
	18501661	4.86	6.21	-2.54	0.0003	0.0171	col-77	COLlagen
	18635625	5.54	4.53	2.02	0.0003	0.0171
	18467264	5.55	6.72	-2.25	0.0003	0.0175	pqn-26	Prion-like-(Q/N-rich)-domain-bearing protein
	18535282	8.01	9.2	-2.28	0.0003	0.0177	col-14	COLlagen
	18525231	6.34	7.97	-3.09	0.0003	0.0177	H10E21.4	hypothetical protein
	18506812	7.6	8.73	-2.19	0.0003	0.0178	sym-2	RNA-binding protein sym-2
	18615016	5.03	6.87	-3.56	0.0003	0.0178	T03G6.1	hypothetical protein
	18597671	3.38	4.91	-2.89	0.0003	0.0178	W02F12.8	hypothetical protein
	18498531	5.5	7.68	-4.53	0.0003	0.0181	F33A8.7	hypothetical protein
	18567209	5.48	7.48	-4.02	0.0003	0.0182	F15B9.8	hypothetical protein
	18559040	5.45	7.97	-5.72	0.0003	0.0182	Y55F3AM.14	hypothetical protein
	18484850	4.52	6.38	-3.64	0.0003	0.0185	F53C3.5	hypothetical protein
	18489190	5.33	6.95	-3.09	0.0003	0.0186	T26C5.2	hypothetical protein
	18624267	5.75	6.78	-2.04	0.0003	0.0186	F20B6.6	hypothetical protein
	18522398	8.75	9.77	-2.03	0.0004	0.0188	mec-12	Tubulin alpha-3 chain
	18562318	7.43	9.19	-3.39	0.0004	0.0188	fkb-3	Peptidyl-prolyl cis-trans isomerase
	18552254	6.27	5.1	2.25	0.0004	0.019	clec-165	C-type LECtin
	18475867	7.23	8.38	-2.21	0.0004	0.019	Y47H10A.5	hypothetical protein
	18537150	6.44	8.75	-4.94	0.0004	0.0191	bed-3	BED-type zinc finger putative transcription factor
	18484034	3.97	4.99	-2.03	0.0004	0.0193	F41G3.3	hypothetical protein
	18599334	4.8	6.51	-3.26	0.0004	0.0193	Y39H10A.4	hypothetical protein
	18604665	3.96	5.05	-2.13	0.0004	0.0194	C25F6.13	ncRNA
	18466522	5.27	6.37	-2.15	0.0004	0.0196	phat-1	PHAryngeal gland Toxin-related
	18468809	3.6	5.6	-4	0.0004	0.0196	F30A10.2	hypothetical protein
	18561770	5.66	7	-2.53	0.0004	0.0198	B0507.1	hypothetical protein
	18451679	7.29	8.63	-2.54	0.0004	0.0207	C15C6.1	hypothetical protein
	18504737	7.71	9.25	-2.91	0.0004	0.0208	ptc-3	PaTChed family
	18555172	6.11	7.3	-2.29	0.0004	0.0209	R09E10.2	hypothetical protein
	18617366	3.75	5.05	-2.47	0.0004	0.0212	Y64H9A.2	hypothetical protein
	18600379	6.5	8.85	-5.09	0.0004	0.0213	lon-8	LONg
	18626490	8.38	9.49	-2.16	0.0004	0.0215	ipla-2	Intracelllar PhosphoLipase A family
	18627869	3.97	5.22	-2.39	0.0004	0.0215	F57G12.2	hypothetical protein
	18472184	8.21	9.25	-2.06	0.0005	0.022	myo-1	Myosin-1
	18515027	5.27	7.27	-4	0.0005	0.0221	R74.2	hypothetical protein
	18540536	5.89	8.03	-4.41	0.0005	0.0221	K08E7.5	hypothetical protein
	18611456	3.97	6.03	-4.19	0.0005	0.0224	kreg-1	Kgb-1(KGB-1) REgulated Genes
	18608979	4.84	6.64	-3.46	0.0005	0.0227	F22F4.1	hypothetical protein
	18479267	4.52	6.23	-3.26	0.0005	0.0229	C14A4.9	hypothetical protein
	18582419	9.8	10.82	-2.03	0.0005	0.0231	abu-7	Activated in Blocked Unfolded protein response
	18534110	5.06	6.12	-2.09	0.0005	0.0232	C26B2.8	hypothetical protein
	18602331	5.25	7.07	-3.54	0.0005	0.0234	mboa-1	O-acyltransferase
	18491567	5.57	6.8	-2.35	0.0005	0.0235	lgc-27	Ligand-Gated ion Channel
	18615118	5.3	7.63	-5.02	0.0005	0.0236	nas-15	Zinc metalloproteinase nas-15
	18619835	5.4	7.02	-3.08	0.0005	0.0241	C14F11.6	hypothetical protein
	18551434	5.02	6.45	-2.7	0.0005	0.0242	col-110	COLlagen
	18621016	4.4	5.59	-2.28	0.0005	0.0247	C34E11.2	hypothetical protein
	18635735	5.5	4.02	2.81	0.0005	0.0248
	18544737	6.69	5.36	2.51	0.0005	0.0248	clec-71	C-type LECtin
	18622000	8.95	10.29	-2.53	0.0005	0.025	C49F8.3	hypothetical protein
	18508321	5.19	7.05	-3.64	0.0006	0.0251	acdh-6	Probable acyl-CoA dehydrogenase 6
	18557552	4.31	6.67	-5.15	0.0006	0.0252	Y11D7A.9	hypothetical protein
	18477265	9.67	8.35	2.51	0.0006	0.0253	ZC247.1	hypothetical protein
	18601518	4.47	5.89	-2.68	0.0006	0.0253	ZC412.13	ncRNA
	18536517	5.22	7.28	-4.16	0.0006	0.0253	nas-14	Zinc metalloproteinase nas-14
	18594991	7.21	9.39	-4.51	0.0006	0.0256	grl-7	GRound-Like (grd related)
	18584016	5.75	7.86	-4.32	0.0006	0.0258	ptr-1	PaTched Related family
	18530635	7.51	8.55	-2.06	0.0006	0.026	pho-9	intestinal acid PHOsphatase
	18604729	6.3	7.84	-2.9	0.0006	0.0261	C25F6.7	hypothetical protein
	18535394	4.64	7.08	-5.41	0.0006	0.0263	mam-2	MAM (Meprin, A5-protein, PTPmu) domain protein
	18491133	5.57	7.66	-4.26	0.0006	0.0263	Y53F4B.27	hypothetical protein
	18461429	5.46	6.49	-2.04	0.0006	0.0264	Y18H1A.16	ncRNA
	18479096	5.42	7.7	-4.86	0.0006	0.0267	col-79	Putative cuticle collagen 79
	18494757	4.87	6.49	-3.07	0.0006	0.0267	C23H3.9	hypothetical protein
	18543104	5.9	6.93	-2.05	0.0006	0.0269	W08E12.3	hypothetical protein
	18635379	8.4	7.31	2.14	0.0006	0.0274
	18490494	5.48	6.92	-2.7	0.0007	0.0278	Y46G5A.29	hypothetical protein
	18627946	4.93	6.43	-2.82	0.0007	0.028	F59D12.2	hypothetical protein
	18567439	4.58	5.83	-2.39	0.0007	0.0281	F18E3.11	hypothetical protein
	18556483	4.54	6.13	-3	0.0007	0.0283	dpy-20	Protein dumpy-20
	18551861	7.22	9.11	-3.71	0.0007	0.0284	acs-20	fatty Acid CoA Synthetase family
	18602054	5.54	7.42	-3.67	0.0007	0.0284	lon-3	Cuticle collagen lon-3
	18582119	4.58	5.97	-2.63	0.0007	0.0286	oac-1	O-ACyltransferase homolog
	18517546	4.76	6.4	-3.12	0.0007	0.0286	Y47D3B.1	hypothetical protein
	18615941	5.67	7.49	-3.52	0.0007	0.0288	lpr-7	LiPocalin-Related protein
	18497878	5.5	6.6	-2.14	0.0007	0.0292	F18C5.5	hypothetical protein
	18580703	5.23	7.03	-3.48	0.0007	0.0292	cyn-17	CYclophyliN
	18595096	6.37	8.32	-3.86	0.0007	0.0299	T03D8.6	hypothetical protein
	18459067	4.27	5.71	-2.72	0.0008	0.0302	T06G6.6	hypothetical protein
	18464574	6.62	8.04	-2.68	0.0008	0.0307	B0205.13	hypothetical protein
	18512736	3.87	5.02	-2.21	0.0008	0.0307	F56D2.3	hypothetical protein
	18478399	5.52	6.79	-2.42	0.0008	0.031	madf-5	MADF domain transcription factor
	18571693	4.09	5.4	-2.48	0.0008	0.031	F58H1.2	hypothetical protein
	18469493	6.13	7.32	-2.29	0.0008	0.031	F36H2.3	hypothetical protein
	18491306	3.73	5.53	-3.48	0.0008	0.031	Y54G9A.12	ncRNA
	18512437	4.17	5.22	-2.07	0.0008	0.0316	F54C4.6	ncRNA
	18626647	4.64	5.74	-2.15	0.0008	0.0316	npax-2	N-terminal PAX (PAI domain only) protein
	18452666	6.26	4.33	3.82	0.0008	0.0316
	18524042	6.26	4.33	3.82	0.0008	0.0316
	18592686	6.26	4.33	3.82	0.0008	0.0316
	18607061	6.26	4.33	3.82	0.0008	0.0316
	18607063	6.26	4.33	3.82	0.0008	0.0316
	18622800	6.26	4.33	3.82	0.0008	0.0316
	18624522	6.26	4.33	3.82	0.0008	0.0316
	18534598	4.35	5.6	-2.38	0.0009	0.0323	C32H11.8; C32H11.11	hypothetical protein
	18549420	4.35	5.6	-2.38	0.0009	0.0323	C32H11.8; C32H11.11	hypothetical protein
	18556345	4.9	6	-2.14	0.0009	0.0323	T19E7.27	ncRNA
	18524301	6.96	8.46	-2.82	0.0009	0.0326	F44E2.4	hypothetical protein
	18589579	6.81	8.17	-2.57	0.0009	0.033	F36H9.5	hypothetical protein
	18536216	5.57	7.19	-3.07	0.0009	0.034	F01G10.10	hypothetical protein
	18576462	5.67	7.56	-3.7	0.001	0.0344	ptr-16	PaTched Related family
	18484745	6.72	7.96	-2.36	0.001	0.0344	efl-3	E2F-like (mammalian transcription factor)
	18482652	3.05	4.3	-2.37	0.001	0.0347	F19B10.13	hypothetical protein
	18520714	4.25	5.32	-2.1	0.001	0.0351	wht-1	ABC transporter ATP-binding protein/permease wht-1
	18582999	6.46	7.82	-2.56	0.001	0.0354	C08E8.10	hypothetical protein
	18483156	5.21	6.86	-3.14	0.001	0.0357	F28C6.5	hypothetical protein
	18624703	5.42	6.52	-2.15	0.0011	0.037	dhs-29	DeHydrogenases, Short chain
	18491660	4.65	6.49	-3.57	0.0011	0.0371	hhat-1	Homolog of Hedgehog AcylTransferase
	18487071	7	8.3	-2.46	0.0011	0.0373	R03H10.2	hypothetical protein
	18456907	5.92	6.94	-2.03	0.0011	0.0375	F56C11.6	Carboxylic ester hydrolase
	18634833	6.4	4.84	2.95	0.0011	0.0376
	18470715	6.93	8.52	-3	0.0011	0.0378	ptr-11	PaTched Related family
	18575315	7.11	8.25	-2.2	0.0011	0.0378	bus-19	hypothetical protein
	18575463	5.81	4.61	2.3	0.0011	0.038	T08G5.18	ncRNA
	18634969	5.66	4.49	2.24	0.0012	0.0385
	18483812	4.5	5.78	-2.43	0.0012	0.0387
	18523225	4.48	5.51	-2.04	0.0012	0.0387	pqn-29	Prion-like-(Q/N-rich)-domain-bearing protein
	18611252	9.41	10.57	-2.23	0.0012	0.0397	aagr-4	Acid Alpha Glucosidase Relate
	18518415	6.97	8.12	-2.21	0.0013	0.0414	gly-8	Probable N-acetylgalactosaminyltransferase 8
	18572864	4.8	6.36	-2.94	0.0013	0.0416	K08B12.1	hypothetical protein
	18523562	5.27	6.54	-2.42	0.0013	0.0416	F26A1.9	hypothetical protein
	18535250	5.92	7.05	-2.2	0.0013	0.0422	C45G7.4	hypothetical protein
	18463822	5.21	6.8	-3.02	0.0013	0.0423	cuti-1	CUTicle and epithelial Integrity
	18611199	7.62	9.03	-2.66	0.0014	0.0425	F49H12.5	hypothetical protein
	18542388	4.64	6.09	-2.72	0.0014	0.0434	bus-4	hypothetical protein
	18538164	4.26	5.57	-2.48	0.0014	0.0437	cutl-28	CUTiclin-Like
	18522392	5.05	6.6	-2.94	0.0014	0.0437	elo-4	Putative fatty acid elongation protein 4
	18634913	6.38	4.92	2.74	0.0014	0.0437
	18634915	6.38	4.92	2.74	0.0014	0.0437
	18581112	7.04	5.96	2.11	0.0014	0.0437	rrn-4.3	5S ribosomal RNA
	18625525	4.83	5.87	-2.06	0.0014	0.0437	igcm-1	ImmunoGlobulin-like Cell adhesion Molecule family
	18544509	4.47	5.99	-2.87	0.0014	0.044	Y43D4A.5	hypothetical protein
	18566806	7.66	6.01	3.15	0.0014	0.0441	clec-7	C-type LECtin
	18518177	5.08	6.25	-2.25	0.0015	0.0443	Y54F10AM.6	hypothetical protein
	18502123	3.76	4.92	-2.23	0.0015	0.0449	R12C12.10	hypothetical protein
	18471757	5.69	7.37	-3.2	0.0015	0.0457	K10D3.4	hypothetical protein
	18500735	5.6	7.22	-3.07	0.0016	0.0463	cbn-1	Calcium BiNding protein homolog
	18532524	3.51	4.57	-2.08	0.0016	0.0466	B0350.71	ncRNA
	18627057	5.72	6.95	-2.36	0.0016	0.0468	F52E4.5	hypothetical protein
	18516242	8.61	9.98	-2.58	0.0016	0.0468	col-88	COLlagen
	18479040	5.12	6.34	-2.32	0.0016	0.0473	lips-7	LIPaSe related
	18579806	4.04	5.09	-2.07	0.0017	0.0476	Y58A7A.7; Y58A7A.8	ncRNA
	18579808	4.04	5.09	-2.07	0.0017	0.0476	Y58A7A.7; Y58A7A.8	ncRNA
	18480429	5.34	6.52	-2.27	0.0016	0.0476	C38C6.3	hypothetical protein
	18570189	6.98	8.21	-2.35	0.0016	0.0476	F45D3.2	hypothetical protein
	18598890	5.36	6.8	-2.72	0.0017	0.0476	Y32G9B.1	hypothetical protein
	18623507	8.46	9.64	-2.27	0.0017	0.0481	F13D11.4	hypothetical protein
	18572526	6.13	7.26	-2.19	0.0017	0.0483
	18502005	6.59	8.4	-3.5	0.0017	0.0489	osm-8	Osmotic avoidance abnormal protein 8
