# Supplementary material for: Transcriptomic Analysis Reveals JAK2/MPL-Independent Effects of Calreticulin Mutations in a C. elegans Model
Source: Cells. 2023 Jan 2;12(1):186. doi: 10.3390/cells12010186 (PMC9818371; doi:10.3390/cells12010186)
Supplement: Supplementary file 1 [file cells-12-00186-s001.zip › Table S7.xlsx]

## Sheet: Hoja1
Table S7. Remarkable biological processes and hallmarks found altered in both type 1 and type 2-like calreticulin-mutated nematodes and their comparison to a calreticulin-KO strain
			CRT-1(mut1) vs WT			CRT-1(mut2) vs WT			CRT-1(KO) vs WT			CRT-1(mut1) vs CRT-1(KO)			CRT-1(mut2) vs CRT-1(KO)
		Gene	Fold change	P-val	FDR P-val	Fold change	P-val	FDR P-val	Fold change	P-val	FDR P-val	Fold change	P-val	FDR P-val	Fold change	P-val	FDR P-val	Description	Human ortholog
Cell cycle	Microtubule cytoskeleton organization	abi-1	2.17	1.44e-05	0.0004	2.32	2.69e-06	0.0001	-	-	-	-	-	-	-	-	-	ABl Interactor homolog	ABI1, ABI2, ABI3
		capg-2	2.31	6.35e-06	0.0003	2.51	1.54e-06	7.99e-05	-	-	-	-	-	-	-	-	-	CAP-G condensin subunit	NCAPG2
		cpg-1	2.41	2.32e-05	0.0006	2.47	6.7e-06	0.0002	-	-	-	-	-	-	-	-	-	Chondroitin proteoglycan 1	-
		cpg-2	2.11	0.0003	0.0028	2.15	0.0001	0.0012	-	-	-	-	-	-	-	-	-	Chondroitin proteoglycan-2	-
		gld-3	2.19	1.5e-05	0.0004	2.27	4.26e-06	0.0001	-	-	-	-	-	-	-	-	-	Defective in germ line development protein 3	-
		kbp-1	2.48	0.0004	0.0032	2.57	0.0002	0.0014	-	-	-	-	-	-	-	-	-	KNL (kinetochore null) Binding Protein	-
		klp-15	2.25	0.0007	0.0054	2.07	0.0008	0.0048	-	-	-	-	-	-	-	-	-	Kinesin-like protein	KIFC1, KIFC3
		mdf-2	2.33	9.6e-06	0.0004	2.23	6.5e-06	0.0002	-	-	-	-	-	-	-	-	-	MAD (yeast Mitosis arrest DeFicient) related	MAD2L1
		mec-7	-2.24	8.81e-05	0.0012	-2.21	3.95e-05	0.0005	-	-	-	-	-	-	-	-	-	Tubulin beta-1 chain	TUBB2A, TUBB2B, TUBB4B, TUBB6
		mes-1	6.46	1.05e-08	1.28e-05	6.75	4.72e-09	5.29e-06	3.76	3.29e-07	0.0002	-	-	-	-	-	-	Maternal Effect Sterile	-
		nop-1	2.28	1.18e-05	0.0004	2.43	2.96e-06	0.0001	-	-	-	-	-	-	-	-	-	Pseudocleavage protein nop-1	-
		plk-1	2.03	2.3e-05	0.0006	2.13	5.03e-06	0.0001	-	-	-	-	-	-	-	-	-	Serine/threonine-protein kinase plk-1	PLK1, PLK2, PLK3
		rmd-1	2.87	5.79e-05	0.0009	2.81	2.67e-05	0.0004	2.13	0.0007	0.0111	-	-	-	-	-	-	Regulator of microtubule dynamics protein 1	RMDN2, RMDN3
		rsa-1	2.18	7.4e-05	0.0011	2.37	2.91e-05	0.0004	-	-	-	-	-	-	-	-	-	Regulator of Spindle Assembly	PPP2R3C
		san-1	2.28	4.7e-05	0.0008	2.15	7.3e-05	0.0008	-	-	-	-	-	-	-	-	-	hypothetical protein	-
		szy-4	3.05	1.66e-05	0.0005	3.05	5.25e-06	0.0002	2.12	0.0004	0.0077	-	-	-	-	-	-	Suppressor of ZYg-1	-
		tba-4	-2.99	3.61e-07	8.47e-05	-3.22	6.99e-08	1.84e-05	-	-	-	-	-	-	-	-	-	TuBulin, Alpha	TUBA1C
		tbb-6	8.3	6.01e-09	1.14e-05	10.92	8.85e-10	2.79e-06	13.56	8.54e-10	5.34e-06	-	-	-	-	-	-	TuBulin, Beta	TUBE1
		unc-61	2.16	7.48e-06	0.0003	2.24	3.56e-06	0.0001	-	-	-	-	-	-	-	-	-	hypothetical protein	SEPT6, SEPT8, SEPT10, SEPT11, SEPT14
	Cell cycle control system	cdc-25.3	5.01	3.11e-06	0.0002	4.39	2.61e-06	0.0001	3.1	4.17e-05	0.0025	-	-	-	-	-	-	M-phase inducer phosphatase cdc-25.3	CDC25A, CDC25B, CDC25C
		cdc-7	2.16	0.0026	0.0145	2	0.006	0.0255	-	-	-	-	-	-	-	-	-	Cell Division Cycle related	CDC7
		cdt-1	2.17	1.19e-05	0.0004	2.16	6.77e-06	0.0002	-	-	-	-	-	-	-	-	-	CDT (S. pombe CDC10 Dependent Transcript) homolog	CDT1
		cyb-2.1	3.2	0.0001	0.0017	3.37	4.61e-05	0.0006	2.46	0.0009	0.0123	-	-	-	-	-	-	CYclin B	CCNA1, CCNA2, CCNB1, CCNB2
		cyb-3	2.27	6.83e-05	0.001	2.2	4.58e-05	0.0006	-	-	-	-	-	-	-	-	-	G2/mitotic-specific cyclin-B3	CCNB3
		cyd-1	2.49	1.54e-05	0.0004	2.28	1.06e-05	0.0002	-	-	-	-	-	-	-	-	-	G1/S-specific cyclin-D	CCND1, CCND2, CCND3
		dpl-1	2.3	5.56e-06	0.0003	2.07	6.98e-06	0.0002	-	-	-	-	-	-	-	-	-	Transcription factor dpl-1	TFDP1, TFDP2, TFDP3
		hus-1	2.36	1.13e-06	0.0001	2.08	2.5e-06	0.0001	-	-	-	-	-	-	-	-	-	human HUS1 related	HUS1, HUS1B
		lrr-1	2.23	4.73e-05	0.0008	2.3	1.35e-05	0.0003	-	-	-	-	-	-	-	-	-	Leucine-Rich Repeat protein	LRR1
		skpt-1	2.23	6.9e-05	0.001	2.48	7.72e-06	0.0002	-	-	-	-	-	-	-	-	-	SKP2 (S phase Kinase associated Protein Two) homolog	SKP2
	DNA synthesis	C27H6.9	2.16	6.13e-05	0.001	2.14	3.82e-05	0.0005	-	-	-	-	-	-	-	-	-	Mitochondrial genome maintenance exonuclease 1	MGME1
		cdt-1	2.17	1.19e-05	0.0004	2.16	6.77e-06	0.0002	-	-	-	-	-	-	-	-	-	CDT (S. pombe CDC10 Dependent Transcript) homolog	CDT1
		evl-18	2.27	1.46e-06	0.0002	2.36	3.37e-07	4.08e-05	-	-	-	-	-	-	-	-	-	hypothetical protein	CDC45
		F12F6.7	2.25	1.86e-05	0.0005	2.01	2.71e-05	0.0004	-	-	-	-	-	-	-	-	-	Probable DNA polymerase delta small subunit	POLD2
		K12D12.5	2.66	1.79e-05	0.0005	2.41	1.86e-05	0.0003	-	-	-	-	-	-	-	-	-	hypothetical protein	-
		lig-1	2.02	8.92e-07	0.0001	2.09	1.91e-07	3.12e-05	-	-	-	-	-	-	-	-	-	DNA ligase 1	LIG1, LIG3
		mcm-10	2.03	2.65e-06	0.0002	2.05	1.32e-06	7.44e-05	-	-	-	-	-	-	-	-	-	yeast MCM (licensing factor) related	MCM10
		mcm-2	2.29	1.28e-05	0.0004	2.24	6.5e-06	0.0002	-	-	-	-	-	-	-	-	-	DNA helicase	MCM2
		mcm-3	2.58	8.44e-06	0.0003	2.52	5.57e-06	0.0002	2.09	9.45e-05	0.0037	-	-	-	-	-	-	DNA helicase	MCM3
		mcm-7	2.03	8.76e-06	0.0003	2.07	3.82e-06	0.0001	-	-	-	-	-	-	-	-	-	DNA helicase	MCM7
		orc-1	2.24	1.08e-05	0.0004	2.42	2.95e-06	0.0001	-	-	-	-	-	-	-	-	-	ORC (Origin Recognition Complex) subunit	ORC1, CDC6
		orc-5	2	3.25e-05	0.0007	2.01	1.19e-05	0.0002	-	-	-	-	-	-	-	-	-	ORC (Origin Recognition Complex) subunit	ORC5
		pole-1	2.26	5.67e-05	0.0009	2.12	3.28e-05	0.0005	-	-	-	-	-	-	-	-	-	DNA polymerase	POLE
		pri-2	2.01	3.01e-06	0.0002	2.05	7.83e-07	5.82e-05	-	-	-	-	-	-	-	-	-	DNA PRImase homolog	PRIM2
		psf-1	2.12	0.0002	0.002	2.14	5.18e-05	0.0006	-	-	-	-	-	-	-	-	-	Probable DNA replication complex GINS protein PSF1	GINS1
		rfc-3	2.11	5.67e-05	0.0009	2.16	1.71e-05	0.0003	-	-	-	-	-	-	-	-	-	RFC (DNA replication factor) family	RFC3
		rnr-2	2.21	1.4e-05	0.0004	2.17	5.36e-06	0.0002	-	-	-	-	-	-	-	-	-	Ribonucleoside-diphosphate reductase small chain	RRM2, RRM2B
		T24C4.5	3.18	5.67e-05	0.0009	3.41	2.36e-05	0.0004	2.02	0.0048	0.037	-	-	-	-	-	-	DNA primase	PRIM1
Repair mechanisms		atm-1	2.41	9.8e-06	0.0004	2.32	5.59e-06	0.0002	-	-	-	-	-	-	-	-	-	Serine/threonine-protein kinase ATM	ATM
		brc-1	2.19	8.15e-05	0.0012	2.1	0.0001	0.001	-	-	-	-	-	-	-	-	-	BRCa homolog (tumor suppressor gene Brca1)	-
		brd-1	2.04	7.54e-05	0.0011	2.17	2.93e-05	0.0004	-	-	-	-	-	-	-	-	-	BRCA1-associated RING domain protein 1	BARD1
		com-1	2.05	1.34e-05	0.0004	2.14	2.03e-06	9.4e-05	-	-	-	-	-	-	-	-	-	Completion Of Meiotic recombination (budding yeast Com) related	-
		dot-1.3	-2.25	4.42e-05	0.0008	-2.76	3.35e-06	0.0001	-	-	-	-	-	-	-	-	-	Histone-lysine N-methyltransferase, H3 lysine-79 specific	DOT1L
		dvc-1	2.8	3.94e-06	0.0002	2.6	3.19e-06	0.0001	2.05	0.0001	0.0045	-	-	-	-	-	-	SprT-like domain-containing protein Spartan	SPRTN
		evl-18	2.27	1.46e-06	0.0002	2.36	3.37e-07	4.08e-05	-	-	-	-	-	-	-	-	-	hypothetical protein	CDC45
		F52C12.1	2.38	6.78e-05	0.001	2.36	1.63e-05	0.0003	-	-	-	-	-	-	-	-	-	Probable tyrosyl-DNA phosphodiesterase	TDP1
		fan-1	2.26	9.07e-05	0.0012	2.15	4.95e-05	0.0006	-	-	-	-	-	-	-	-	-	Fanconi Anemia-associated Nuclease	FAN1
		him-14	2.29	9.09e-06	0.0003	2.08	5.78e-06	0.0002	-	-	-	-	-	-	-	-	-	MutS protein homolog him-14	MSH4
		hus-1	2.36	1.13e-06	0.0001	2.08	2.5e-06	0.0001	-	-	-	-	-	-	-	-	-	human HUS1 related	HUS1, HUS1B
		lig-1	2.02	8.92e-07	0.0001	2.09	1.91e-07	3.12e-05	-	-	-	-	-	-	-	-	-	DNA ligase 1	LIG1, LIG3
		mre-11	2.02	9.1e-06	0.0003	2.04	3.28e-06	0.0001	-	-	-	-	-	-	-	-	-	Double-strand break repair protein mre-11	MRE11
		mrt-1	2.06	8.6e-06	0.0003	2.11	3.55e-06	0.0001	-	-	-	-	-	-	-	-	-	MoRTal germline	DCLRE1A, DCLRE1B
		msh-5	2.14	2.21e-05	0.0005	2.02	2.2e-05	0.0003	-	-	-	-	-	-	-	-	-	MSH (MutS Homolog) family	MSH5
		nth-1	2.81	5.65e-05	0.0009	2.67	2.06e-05	0.0003	2.29	0.0005	0.0084	-	-	-	-	-	-	Endonuclease III homolog	NTHL1
		pif-1	2.27	6.88e-06	0.0003	2.08	6.63e-06	0.0002	-	-	-	-	-	-	-	-	-	ATP-dependent DNA helicase PIF1	PIF1
		pole-1	2.26	5.67e-05	0.0009	2.12	3.28e-05	0.0005	-	-	-	-	-	-	-	-	-	DNA polymerase	POLE
		polh-1	2.08	9.33e-05	0.0013	2.08	3.04e-05	0.0004	-	-	-	-	-	-	-	-	-	POLH (DNA polymerase eta) homolog	POLH
		polk-1	2.92	7.28e-06	0.0003	2.82	3.55e-06	0.0001	-	-	-	-	-	-	-	-	-	DNA polymerase kappa	POLK
		polq-1	2.08	0.0065	0.0299	2.01	0.0115	0.043	-	-	-	-	-	-	-	-	-	DNA polymerase theta	POLQ
		rfc-3	2.11	5.67e-05	0.0009	2.16	1.71e-05	0.0003	-	-	-	-	-	-	-	-	-	RFC (DNA replication factor) family	RFC3
		wapl-1	2.07	5.59e-07	9.61e-05	2.24	6.44e-08	1.77e-05	-	-	-	-	-	-	-	-	-	WAPL (Drosophila Wings APart-Like cohesin interactor)	WAPL
Metabolism	Oxidative phosphorylation	acdh-1	-2.93	1.38e-07	5.03e-05	-2.88	6.28e-08	1.77e-05	-	-	-	-2.02	1.01e-05	0.0042	-	-	-	Acyl CoA DeHydrogenase	ACADS, ACADSB
		ech-1.1	-5.98	3.64e-07	8.47e-05	-5.7	9.91e-08	2.15e-05	-6.14	3.18e-07	0.0002	-	-	-	-	-	-	Enoyl-CoA Hydratase	HADHA, EHHADH
		ech-6	-2.41	3.62e-07	8.47e-05	-2.21	3.65e-07	4.23e-05	-	-	-	-	-	-	-	-	-	Probable enoyl-CoA hydratase, mitochondrial	ECHS1
		mtrr-1	-2.63	1.55e-05	0.0004	-2.4	1.1e-05	0.0002	-	-	-	-	-	-	-	-	-	Putative methionine synthase reductase	MTRR
	Adipogenesis	acs-20	-3.4	0.001	0.0071	-3.86	0.0002	0.002	-	-	-	-	-	-	-3.71	0.0007	0.0284	fatty Acid CoA Synthetase family	SLC27A1, SLC27A4
		acs-22	-2.5	6.9e-05	0.001	-2.55	2.28e-05	0.0004	-	-	-	-	-	-	-	-	-	fatty Acid CoA Synthetase family	SLC27A1, SLC27A4
		B0272.3	-2.11	1.74e-06	0.0002	-2.6	5.76e-08	1.77e-05	-	-	-	-	-	-	-	-	-	Probable 3-hydroxyacyl-CoA dehydrogenase B0272.3	HADH
		ech-6	-2.41	3.62e-07	8.47e-05	-2.21	3.65e-07	4.23e-05	-	-	-	-	-	-	-	-	-	Probable enoyl-CoA hydratase, mitochondrial	ECHS1
		lbp-5	-2.53	5.29e-06	0.0003	-2.45	2.66e-06	0.0001	-2.61	3.88e-06	0.0008	-	-	-	-	-	-	Fatty acid-binding protein homolog 5	FABP3, FABP4, FABP7, PMP2
		scav-1	-2.42	3.63e-07	8.47e-05	-2.2	3.71e-07	4.24e-05	-	-	-	-	-	-	-	-	-	SCAVenger receptor (CD36 family) related	CD36, SCARB1, SCARB2
	Glycolysis	gfat-2	2.4	0.0002	0.0023	2.38	0.0001	0.0011	-	-	-	-	-	-	-	-	-	Glutamine-Fructose 6-phosphate AminoTransferase homolog	GFPT1,GFPT2
		hse-5	2.06	5.5e-05	0.0009	2.29	2.24e-05	0.0003	-	-	-	-	-	-	-	-	-	D-glucuronyl C5-epimerase	GLCE
		Y39G8B.2	2.1	0.0004	0.0032	2.22	0.0003	0.0023	-	-	-	-	-	-	-	-	-	hypothetical protein	AKR1A1, AKR1B1, AKR1B10
	Bile acid metabolism	agxt-1	-2.53	5.23e-06	0.0003	-2.38	3.69e-06	0.0001	-	-	-	-	-	-	-	-	-	Serine--pyruvate aminotransferase	AGXT
		dhs-28	-2.8	1.04e-06	0.0001	-2.49	9.4e-07	6.31e-05	-	-	-	-	-	-	-	-	-	DeHydrogenases, Short chain	HSD17B4
		mboa-1	-2.49	0.0024	0.0139	-2.9	0.0006	0.0038	-	-	-	-	-	-	-3.54	0.0005	0.0234	O-acyltransferase	SOAT1,SOAT2
		pmp-4	-2.05	0.0003	0.0029	-2.39	2.13e-05	0.0003	-	-	-	-	-	-	-	-	-	Peroxisomal Membrane Protein related	ABCD1, ABCD2
		Y39G8B.1	-2.12	1.1e-05	0.0004	-2.05	5.66e-06	0.0002	-	-	-	-	-	-	-	-	-	hypothetical protein	AKR1A1, AKR1B1, AKR1B10
	Fatty acid metabolism	B0272.3	-2.11	1.74e-06	0.0002	-2.6	5.76e-08	1.77e-05	-	-	-	-	-	-	-	-	-	Probable 3-hydroxyacyl-CoA dehydrogenase B0272.3	HADH
		ech-6	-2.41	3.62e-07	8.47e-05	-2.21	3.65e-07	4.23e-05	-	-	-	-	-	-	-	-	-	Probable enoyl-CoA hydratase, mitochondrial	ECHS1
		scav-1	-2.42	3.63e-07	8.47e-05	-2.2	3.71e-07	4.24e-05	-	-	-	-	-	-	-	-	-	SCAVenger receptor (CD36 family) related	CD36, SCARB1, SCARB2
		dhs-28	-2.8	1.04e-06	0.0001	-2.49	9.4e-07	6.31e-05	-	-	-	-	-	-	-	-	-	DeHydrogenases, Short chain	HSD17B4
		fmo-1	-3.15	0.0001	0.0015	-2.49	0.0004	0.0027	-	-	-	-	-	-	-	-	-	Dimethylaniline monooxygenase [N-oxide-forming]	FMO1, FMO2, FMO3, FMO4, FMO5
		odc-1	-3.69	9.5e-07	0.0001	-3.75	1.42e-07	2.74e-05	-	-	-	-	-	-	-2	4.28e-05	0.0059	Ornithine decarboxylase	ODC1, AZIN1, AZIN2
Extracellular matrix	Structural components of cuticle	bli-1	-2.4	0.007	0.0317	-4.39	8.91e-05	0.0009	-	-	-	-	-	-	-6.73	3.72e-05	0.0054	Cuticle collagen bli-1	SFTPD
		bli-2	-3.48	0.002	0.0118	-4.48	0.0003	0.0021	-	-	-	-4.32	0.0012	0.0447	-5.55	0.0002	0.0147	BLIstered cuticle	MARCO
		bli-6	-4.73	2.53e-07	7.1e-05	-5.07	5.71e-08	1.77e-05	-	-	-	-3.35	5.46e-06	0.0033	-3.6	1.43e-06	0.0009	BLIstered cuticle	MARCO
		col-101	4.89	0.0003	0.0025	2.59	0.0034	0.0157	3.11	0.0024	0.0234	-	-	-	-	-	-	COLlagen	MARCO
		col-103	5.04	6.81e-06	0.0003	4.03	7.17e-06	0.0002	3.6	5.18e-05	0.0027	-	-	-	-	-	-	COLlagen	-
		col-104	-5.67	8e-08	3.75e-05	-7.55	1.09e-08	7.86e-06	-	-	-	-3	1.3e-05	0.0047	-3.99	1.54e-06	0.0009	COLlagen	C1QTNF2, C1QTNF7, C1QTNF9, ADIPOQ, OTOL1
		col-107	-3.36	2.67e-06	0.0002	-3.69	2.09e-07	3.28e-05	-	-	-	-2.59	4.84e-05	0.0094	-2.84	3.75e-06	0.0016	COLlagen	SFTPD
		col-109	-6.03	1.8e-06	0.0002	-7.63	1.29e-07	2.58e-05	-	-	-	-3.18	0.0002	0.0186	-4.02	9.6e-06	0.0025	COLlagen	-
		col-110	-2.72	0.0005	0.0041	-3.14	5.67e-05	0.0007	-	-	-	-	-	-	-2.7	0.0005	0.0242	COLlagen	-
		col-111	-3.7	0.0003	0.0029	-3.23	0.0003	0.0024	-	-	-	-	-	-	-	-	-	COLlagen	C1QTNF2, C1QTNF7, C1QTNF9, ADIPOQ, OTOL1
		col-113	-2.64	1.05e-05	0.0004	-2.35	1.88e-05	0.0003	-	-	-	-	-	-	-	-	-	COLlagen	C1QTNF2, C1QTNF7, C1QTNF9, ADIPOQ, OTOL1
		col-115	-5.77	8.31e-07	0.0001	-5.41	3.59e-07	4.21e-05	-	-	-	-3.04	4.29e-05	0.0088	-2.85	2.58e-05	0.0044	COLlagen	-
		col-120	-12.08	1.68e-09	8.14e-06	-12.07	7.2e-10	2.79e-06	-3	6.54e-06	0.0011	-4.03	7.49e-07	0.0018	-4.03	4.86e-07	0.0007	COLlagen	MARCO
		col-130	-6.58	5.14e-07	9.57e-05	-6.11	1.27e-07	2.57e-05	-2.04	0.0017	0.019	-3.22	7.59e-05	0.0123	-2.99	2.17e-05	0.0039	COLlagen	SFTPD
		col-131	-4.69	7.89e-05	0.0011	-5.99	7.27e-06	0.0002	-3.16	0.0012	0.0154	-	-	-	-	-	-	COLlagen	SFTPD
		col-135	2.25	7.09e-05	0.0011	2.59	7.66e-06	0.0002	-	-	-	-	-	-	-	-	-	COLlagen	COL25A1, COL9A1, COL9A2, COL9A3, COL19A1
		col-137	-6.72	5.62e-05	0.0009	-6.11	3.96e-05	0.0005	-6.44	7e-05	0.0032	-	-	-	-	-	-	COLlagen	MARCO
		col-138	-5.79	1.55e-06	0.0002	-7.83	1.43e-07	2.74e-05	-	-	-	-4.02	2.94e-05	0.0074	-5.43	2.71e-06	0.0013	COLlagen	MARCO
		col-14	-3.92	3.59e-06	0.0002	-3.56	3.02e-06	0.0001	-	-	-	-2.52	0.0002	0.0209	-2.28	0.0003	0.0177	COLlagen	MARCO, COL17A1
		col-142	3.73	1.04e-05	0.0004	3.06	2.44e-05	0.0004	2	0.0016	0.0177	-	-	-	-	-	-	COLlagen	SFTPD
		col-143	8.8	3.37e-05	0.0007	5.03	0.0001	0.0013	6.01	0.0002	0.0048	-	-	-	-	-	-	COLlagen	SFTPD
		col-152	-9.25	4.22e-07	8.93e-05	-7.3	3.82e-07	4.27e-05	-4.34	2.76e-05	0.0021	-	-	-	-	-	-	COLlagen	SFTPD
		col-156	-23.69	1.54e-08	1.51e-05	-17.93	1.26e-08	8.34e-06	-6.13	3.03e-06	0.0007	-3.86	8.33e-05	0.013	-2.92	0.0002	0.0158	COLlagen	SFTPD
		col-157	-5.71	7.27e-07	0.0001	-9.61	2.75e-08	1.09e-05	-	-	-	-2.89	0.0001	0.0161	-4.86	2.48e-06	0.0012	COLlagen	MARCO
		col-167	-2.58	1.34e-05	0.0004	-2.7	3.02e-06	0.0001	-	-	-	-	-	-	-	-	-	COLlagen	MARCO
		col-168	-5.02	1.63e-06	0.0002	-4.35	1.41e-06	7.73e-05	-2.76	0.0001	0.0039	-	-	-	-	-	-	COLlagen	MARCO
		col-17	-3.11	0.0001	0.0015	-5.38	1.35e-06	7.55e-05	-	-	-	-3.13	0.0003	0.0259	-5.42	4.42e-06	0.0018	COLlagen	NCOA5
		col-170	-6.5	7.29e-08	3.61e-05	-6.19	2.38e-08	1.05e-05	-4.75	4.14e-07	0.0002	-	-	-	-	-	-	COLlagen	MARCO
		col-172	-4.87	0.0002	0.0018	-5.1	2.79e-05	0.0004	-	-	-	-	-	-	-	-	-	COLlagen	MARCO
		col-173	-4.03	6e-05	0.001	-5.66	4.92e-06	0.0001	-	-	-	-	-	-	-3.7	0.0002	0.0129	COLlagen	MARCO
		col-174	-3.38	2.39e-06	0.0002	-4.13	2.53e-07	3.59e-05	-2.22	9.85e-05	0.0038	-	-	-	-	-	-	COLlagen	MARCO
		col-175	-5.25	3.46e-06	0.0002	-5.51	9.61e-07	6.31e-05	-	-	-	-3.21	0.0003	0.0236	-3.37	8.9e-05	0.0091	COLlagen	SFTPD
		col-180	-2.08	0.0008	0.0057	-2.06	0.0005	0.0032	-	-	-	-	-	-	-	-	-	COLlagen	MARCO
		col-182	-2.66	0.0035	0.0183	-3.73	0.0005	0.0032	-	-	-	-	-	-	-	-	-	COLlagen	C1QTNF2, C1QTNF7, C1QTNF9, ADIPOQ, OTOL1
		col-34	-3.67	0.0006	0.0049	-4.49	0.0002	0.0014	-	-	-	-	-	-	-	-	-	Cuticle collagen 34	MARCO
		col-38	-5.03	1.02e-05	0.0004	-8.07	8.31e-07	6.03e-05	-	-	-	-3.58	0.0002	0.0175	-5.75	1.3e-05	0.0029	COLlagen	SFTPD
		col-42	3.47	1.65e-05	0.0005	2.82	2.83e-05	0.0004	2.48	0.0002	0.0053	-	-	-	-	-	-	COLlagen	MARCO
		col-48	-5.57	9.18e-06	0.0004	-7.17	1e-06	6.45e-05	-	-	-	-3.01	0.0007	0.0375	-3.88	7.76e-05	0.0084	COLlagen	MARCO, COL17A1
		col-49	-5.74	6.6e-06	0.0003	-6.95	9.55e-07	6.31e-05	-	-	-	-4.03	9.81e-05	0.0143	-4.87	1.59e-05	0.0032	COLlagen	SFTPD
		col-58	-4.24	3.75e-06	0.0002	-3.91	3.99e-06	0.0001	-	-	-	-2.51	0.0001	0.0171	-2.31	0.0003	0.016	COLlagen	COLQ
		col-60	-8.37	6.96e-09	1.16e-05	-6.61	8.62e-09	7.19e-06	-2.64	1.01e-05	0.0013	-3.17	5.64e-06	0.0033	-2.51	2.56e-05	0.0044	COLlagen	SFTPD
		col-61	-2.2	0.001	0.0068	-2.21	0.0013	0.0075	-	-	-	-	-	-	-	-	-	COLlagen	SFTPD
		col-63	-5.08	2.43e-05	0.0006	-6.79	4.34e-06	0.0001	-	-	-	-4.07	0.0002	0.0187	-5.43	3.82e-05	0.0055	COLlagen	SFTPD
		col-65	-5.61	6.43e-07	0.0001	-5.6	5.85e-07	5.21e-05	-	-	-	-3.71	1.19e-05	0.0044	-3.7	1.66e-05	0.0033	COLlagen	SFTPD
		col-68	-2.99	2.29e-05	0.0006	-3.56	2.17e-06	9.7e-05	-2.7	5.29e-05	0.0028	-	-	-	-	-	-	COLlagen	MARCO
		col-71	-4.14	1.43e-05	0.0004	-6.87	2.63e-07	3.63e-05	-	-	-	-2.66	0.0005	0.0325	-4.41	6.39e-06	0.0021	COLlagen	COLQ
		col-73	-4.1	5.13e-07	9.57e-05	-6.57	2.49e-08	1.07e-05	-	-	-	-3.1	1.61e-05	0.0051	-4.97	6.34e-07	0.0008	COLlagen	MARCO
		col-77	-4.01	5.68e-06	0.0003	-3.38	6.19e-06	0.0002	-	-	-	-3.02	0.0002	0.0181	-2.54	0.0003	0.0171	COLlagen	MARCO
		col-79	-4.15	0.0013	0.0083	-5.68	0.0001	0.0012	-	-	-	-	-	-	-4.86	0.0006	0.0267	Putative cuticle collagen 79	SFTPD
		col-8	4.39	0.002	0.0121	3.34	0.0027	0.0133	-	-	-	-	-	-	-	-	-	Cuticle collagen 8	SFTPD
		col-88	-8.6	2.65e-07	7.29e-05	-8.14	2.64e-07	3.63e-05	-3.16	6.67e-05	0.0031	-2.72	0.0005	0.0322	-2.58	0.0016	0.0468	COLlagen	SFTPD
		col-89	-2.49	0.0004	0.0037	-2.62	0.0001	0.0011	-	-	-	-	-	-	-	-	-	COLlagen	SFTPD
		col-91	-5.58	2.04e-07	6.5e-05	-4.36	3.6e-07	4.21e-05	-2.24	0.0003	0.0066	-2.49	7.72e-05	0.0123	-	-	-	Putative cuticle collagen 91	SFTPD
		col-97	-8.06	5.26e-07	9.57e-05	-11.43	6.2e-08	1.77e-05	-2.25	0.0041	0.0328	-3.57	4.32e-05	0.0088	-5.07	4.6e-06	0.0018	COLlagen	-
		col-98	7.12	2.41e-07	6.9e-05	5.5	2.99e-07	3.92e-05	4.36	3.89e-06	0.0008	-	-	-	-	-	-	COLlagen	-
		cut-4	-2.8	8.04e-07	0.0001	-2.67	4.37e-07	4.56e-05	-	-	-	-	-	-	-	-	-	CUTiclin	-
		dpy-13	-3.65	1.06e-05	0.0004	-6.33	9.36e-08	2.09e-05	-	-	-	-3.15	0.0001	0.0165	-5.47	9.67e-07	0.0008	Cuticle collagen dpy-13	C1QTNF2, C1QTNF7, C1QTNF9, ADIPOQ, OTOL1
		dpy-3	-2.76	9.52e-05	0.0013	-2.78	4.61e-05	0.0006	-	-	-	-4.72	5.06e-06	0.0033	-4.76	2.55e-06	0.0012	DumPY: shorter than wild-type	C1QTNF2, C1QTNF7, C1QTNF9, ADIPOQ, OTOL1
		dpy-4	-3.06	2.55e-05	0.0006	-6.07	7.71e-08	1.94e-05	-	-	-	-2.83	7.73e-05	0.0123	-5.62	2.8e-07	0.0007	DumPY: shorter than wild-type	MARCO
		dpy-5	-3.83	0.0001	0.0016	-5.98	1.52e-05	0.0003	-	-	-	-3.12	0.0009	0.0408	-4.87	0.0001	0.0111	Cuticle collagen dpy-5	SFTPD
		dpy-7	-2.07	0.0001	0.0015	-2.05	0.0002	0.0016	-	-	-	-2.52	3.62e-05	0.0082	-2.49	4.81e-05	0.0063	Cuticle collagen dpy-7	SFTPD
		noah-1	-2.82	0.0002	0.002	-3.27	5.07e-05	0.0006	-	-	-	-4.74	1.61e-05	0.0051	-5.49	5.41e-06	0.002	NOmpA Homolog (Drosophila nompA: no mechanoreceptor potential A)	-
		noah-2	-2.05	0.0033	0.0175	-2.87	0.0001	0.0013	-	-	-	-3.69	0.0001	0.0148	-5.15	8.66e-06	0.0024	NOmpA Homolog (Drosophila nompA: no mechanoreceptor potential A)	-
		ram-2	-2.4	3.29e-05	0.0007	-2.8	1.36e-06	7.55e-05	-	-	-	-	-	-	-2.09	2.89e-05	0.0047	hypothetical protein	MARCO
		rol-1	-3.42	9.16e-06	0.0004	-6.93	6.15e-08	1.77e-05	-	-	-	-2.85	7.78e-05	0.0123	-5.77	4.63e-07	0.0007	ROLler: helically twisted, animals roll when moving	-
		rol-6	-3.08	0.0008	0.0061	-4.78	4.17e-05	0.0005	-	-	-	-	-	-	-4.08	0.0003	0.0165	Cuticle collagen rol-6	COLQ
		rol-8	-2.91	0.0004	0.0036	-4.36	1.36e-05	0.0003	-	-	-	-2.96	0.0008	0.0386	-4.43	3.44e-05	0.0052	Cuticle collagen 6	MARCO
		sqt-1	-5.55	3.12e-05	0.0007	-9.77	1.61e-06	8.19e-05	-	-	-	-4.77	0.0001	0.0174	-8.4	8.93e-06	0.0024	Cuticle collagen sqt-1	COLQ
		sqt-2	-3.85	0.0002	0.0021	-5.78	1.26e-05	0.0002	-	-	-	-3.45	0.0009	0.0395	-5.19	6.44e-05	0.0076	SQuaT	MARCO
		sqt-3	-3.15	0.0002	0.0022	-6.06	2.08e-06	9.57e-05	-	-	-	-3.24	0.0003	0.0272	-6.22	4.87e-06	0.0018	Cuticle collagen 1	-
	Regulators of cuticle	abu-1	-4.22	4.23e-07	8.93e-05	-5.09	6.13e-08	1.77e-05	-2.31	5.85e-05	0.0029	-	-	-	-2.21	0.0001	0.0116	Activated in Blocked Unfolded protein response	KRTAP10-4, KRTAP10-5, KRTAP10-6, KRTAP10-9, KRTAP10-11
		abu-10	-4.43	4.88e-05	0.0008	-4.58	1.82e-05	0.0003	-2.58	0.0032	0.0282	-	-	-	-	-	-	Activated in Blocked Unfolded protein response	KRTAP10-7
		abu-11	-5.53	7.37e-08	3.61e-05	-4.98	4.66e-08	1.65e-05	-2.58	2.31e-05	0.0019	-2.14	0.0002	0.0177	-	-	-	Activated in Blocked Unfolded protein response	-
		abu-12	-5.01	9.33e-05	0.0013	-9.47	2.17e-06	9.7e-05	-	-	-	-	-	-	-5.78	6.75e-05	0.0078	Activated in Blocked Unfolded protein response	-
		abu-13	-3.81	0.0007	0.0056	-6.73	1.66e-05	0.0003	-	-	-	-	-	-	-5.35	0.0001	0.0115	Activated in Blocked Unfolded protein response	-
		abu-14	-5.88	4.46e-08	2.69e-05	-6.36	9.99e-09	7.86e-06	-	-	-	-3.38	3.58e-06	0.0033	-3.66	8.82e-07	0.0008	Activated in Blocked Unfolded protein response	-
		abu-15	-3.13	0.0003	0.0031	-3.17	0.0001	0.0013	-	-	-	-	-	-	-	-	-	Activated in Blocked Unfolded protein response	KRTAP9-1
		abu-2	-6.34	2.94e-07	7.86e-05	-4.78	3.27e-07	4.08e-05	-3.06	2.27e-05	0.0019	-	-	-	-	-	-	Activated in Blocked Unfolded protein response	-
		abu-4	-2.93	1.91e-07	6.17e-05	-3.52	2.64e-08	1.09e-05	-2.46	1.04e-06	0.0004	-	-	-	-	-	-	Activated in Blocked Unfolded protein response	-
		abu-6	-3.74	1.34e-06	0.0001	-3.74	6.08e-07	5.27e-05	-	-	-	-	-	-	-	-	-	Activated in Blocked Unfolded protein response	KRTAP9-1
		abu-7	-3.58	2.09e-06	0.0002	-4.01	5.02e-07	4.88e-05	-	-	-	-	-	-	-2.03	0.0005	0.0231	Activated in Blocked Unfolded protein response	-
		abu-8	-3.08	3.17e-06	0.0002	-3.24	7.63e-07	5.78e-05	-	-	-	-	-	-	-	-	-	Activated in Blocked Unfolded protein response	-
		acn-1	-4.1	0.0001	0.0014	-6	8.61e-06	0.0002	-	-	-	-4.06	0.0003	0.024	-5.94	2.53e-05	0.0043	Inactive angiotensin-converting enzyme-related protein	ACE, ACE2, TMEM27
		bli-5	-2.39	0.001	0.0067	-2.66	0.0002	0.0015	-	-	-	-	-	-	-	-	-	BLIstered cuticle	-
		bus-4	-2.97	0.0002	0.0023	-3.78	3.1e-05	0.0004	-	-	-	-	-	-	-2.72	0.0014	0.0434	hypothetical protein	C1GALT1C1, C1GALT1C1L
		bus-8	-3.22	0.0021	0.0125	-5.46	5.69e-05	0.0007	-	-	-	-4.14	0.0011	0.0439	-7.01	4.75e-05	0.0062	hypothetical protein	ALG2
		bus-19	-2.93	0.0001	0.0015	-2.6	0.0001	0.001	-	-	-	-2.48	0.001	0.0423	-2.2	0.0011	0.0378	hypothetical protein	TMEM41A, TMEM41B
		cpz-1	-2.71	5.77e-05	0.0009	-3.17	4.79e-06	0.0001	-	-	-	-	-	-	-	-	-	CathePsin Z	CTSZ
		cyn-17	-3.3	0.0006	0.0046	-4.42	6.27e-05	0.0007	-	-	-	-	-	-	-3.48	0.0007	0.0292	CYclophyliN	-
		fkb-3	-3.83	0.0001	0.0016	-5.31	8.81e-06	0.0002	-	-	-	-	-	-	-3.39	0.0004	0.0188	Peptidyl-prolyl cis-trans isomerase	FKBP9
		mlt-10	-3.37	0.0017	0.0104	-6.32	3.11e-05	0.0004	-	-	-	-	-	-	-7.08	5.36e-05	0.0066	hypothetical protein	-
		mlt-11; W01F3.4	-2.35	0.0001	0.0016	-4.55	1.4e-06	7.67e-05	-	-	-	-4.14	2.03e-05	0.0059	-8.01	5.21e-07	0.0007	hypothetical protein; ncRNA	-
		mlt-8	-3.22	0.0001	0.0017	-5.34	2.67e-06	0.0001	-	-	-	-2.94	0.0005	0.0332	-4.89	1.18e-05	0.0028	hypothetical protein	-
		mlt-9	-2.41	0.0072	0.0322	-3.28	0.0005	0.0035	-	-	-	-3.91	0.0012	0.0454	-5.32	0.0001	0.0111	hypothetical protein	-
		nas-36	-6.25	7.55e-06	0.0003	-6.14	1.46e-06	7.8e-05	-3.38	0.0004	0.0073	-	-	-	-	-	-	Zinc metalloproteinase nas-36	MEP1A, MEP1B
		pqn-13	-4.71	0.0001	0.0013	-7.41	4.88e-06	0.0001	-	-	-	-	-	-	-4.75	0.0001	0.0107	Prion-like-(Q/N-rich)-domain-bearing protein	KRTAP9-1
		pqn-2	-5.53	2.83e-08	2.08e-05	-4.47	3.64e-08	1.39e-05	-2.14	4.9e-05	0.0027	-2.59	1.52e-05	0.0051	-2.09	6.57e-05	0.0077	Prion-like-(Q/N-rich)-domain-bearing protein	KRTAP10-4, KRTAP10-5, KRTAP10-6, KRTAP10-9, KRTAP10-11
		pqn-26	-4.12	1.46e-06	0.0002	-4.03	4.48e-07	4.63e-05	-	-	-	-2.3	0.0008	0.0377	-2.25	0.0003	0.0175	Prion-like-(Q/N-rich)-domain-bearing protein	IVL
		pqn-29	-4.21	4.62e-06	0.0003	-4.42	1.24e-06	7.17e-05	-2.16	0.0009	0.0123	-	-	-	-2.04	0.0012	0.0387	Prion-like-(Q/N-rich)-domain-bearing protein	-
		pqn-31	4.06	0.0047	0.023	3.47	0.0049	0.0215	-	-	-	-	-	-	-	-	-	Prion-like-(Q/N-rich)-domain-bearing protein	-
		pqn-32	-2.69	0.0032	0.0173	-6.81	1.72e-05	0.0003	-	-	-	-	-	-	-8.52	2.31e-05	0.004	Prion-like-(Q/N-rich)-domain-bearing protein	-
		pqn-35	-3.46	5.1e-05	0.0009	-4.1	4.86e-06	0.0001	-	-	-	-	-	-	-2.51	0.0001	0.012	Prion-like-(Q/N-rich)-domain-bearing protein	-
		pqn-54	-4.94	8.62e-08	3.82e-05	-6.48	6.02e-09	5.7e-06	-2.29	5.93e-05	0.0029	-2.16	8.06e-05	0.0126	-2.84	2.76e-06	0.0013	Prion-like-(Q/N-rich)-domain-bearing protein	KRTAP9-1
		pqn-57; abu-9	-3.72	2.51e-05	0.0006	-3.5	1.51e-05	0.0003	-2.56	0.0004	0.0082	-	-	-	-	-	-	Prion-like-(Q/N-rich)-domain-bearing protein; Activated in Blocked Unfolded protein response	-
		pqn-63	-8.19	1.16e-08	1.28e-05	-9.27	1.33e-09	3.31e-06	-2.46	2.62e-05	0.002	-3.33	5.96e-06	0.0034	-3.77	4.68e-07	0.0007	Prion-like-(Q/N-rich)-domain-bearing protein	PRB2, PRB3, PRB4, PRH1, PRH2
		pqn-74	-4.61	1.72e-09	8.14e-06	-5.81	1.27e-10	1.47e-06	-	-	-	-2.39	6.78e-07	0.0018	-3.01	2.72e-08	0.0002	Prion-like-(Q/N-rich)-domain-bearing protein	-
		pqn-76; abu-5; pqn-78	-5.49	6.91e-09	1.16e-05	-4.98	3.67e-09	4.78e-06	-2.24	5.76e-06	0.001	-2.45	9.3e-06	0.0041	-2.23	9.58e-06	0.0025	Prion-like-(Q/N-rich)-domain-bearing protein; Activated in Blocked Unfolded protein response	-
		pqn-79; pqn-76; abu-5; pqn-78	-4.4	0.0007	0.0053	-4	0.0001	0.001	-	-	-	-	-	-	-	-	-	Prion-like-(Q/N-rich)-domain-bearing protein; Activated in Blocked Unfolded protein response	-
		pqn-82	2.74	6.04e-06	0.0003	2.41	7.28e-06	0.0002	-	-	-	-	-	-	-	-	-	Prion-like-(Q/N-rich)-domain-bearing protein	-
		pqn-89	-2.8	1.08e-05	0.0004	-2.72	6.03e-06	0.0002	-	-	-	-	-	-	-	-	-	Prion-like-(Q/N-rich)-domain-bearing protein	-
		pqn-90	-6.88	9.06e-08	3.84e-05	-5.71	9.22e-08	2.08e-05	-3.38	6.48e-06	0.0011	-2.03	0.0011	0.043	-	-	-	Prion-like-(Q/N-rich)-domain-bearing protein	KRTAP10-1
		pqn-91	-3.25	0.0022	0.0127	-3.69	0.0004	0.003	-2.8	0.0057	0.0414	-	-	-	-	-	-	Prion-like-(Q/N-rich)-domain-bearing protein	KRTAP10-1
		pqn-92	2.49	1.15e-05	0.0004	2.38	7.21e-06	0.0002	2.04	0.0001	0.0042	-	-	-	-	-	-	Prion-like-(Q/N-rich)-domain-bearing protein	-
		suro-1	-5.4	1.05e-05	0.0004	-4.05	1.43e-05	0.0003	-	-	-	-3.92	8.41e-05	0.0131	-2.94	0.0002	0.0128	SUPpressor of ROller	CPA1, CPA2, CPA3, CPA4, CPA5, CPA6, CPB1
		lin-41	2.87	4.16e-05	0.0008	2.73	2.59e-05	0.0004	2.18	0.0005	0.0085	-	-	-	-	-	-	Protein lin-41	TRIM71
		lin-42	-2.33	0.0004	0.0036	-2.82	3.55e-05	0.0005	-	-	-	-2.83	0.0003	0.0249	-3.44	3.39e-05	0.0051	Period protein homolog lin-42	PER1, PER2, PER3
	Basement membranes	nid-1	-2.02	5.02e-06	0.0003	-2.42	2.51e-07	3.59e-05	-	-	-	-	-	-	-	-	-	NIDogen (basement membrane protein)	STAB1
	Metalloproteinases	nas-13	-3.29	0.0008	0.0057	-2.73	0.002	0.0105	-	-	-	-	-	-	-	-	-	Zinc metalloproteinase nas-13	ASTL, MEP1A, MEP1B
		nas-14	-4.52	0.0006	0.0047	-5.4	6.88e-05	0.0008	-	-	-	-	-	-	-4.16	0.0006	0.0253	Zinc metalloproteinase nas-14	ASTL, MEP1A, MEP1B
		nas-15	-4.63	0.0014	0.0091	-6.36	7.92e-05	0.0009	-	-	-	-	-	-	-5.02	0.0005	0.0236	Zinc metalloproteinase nas-15	ASTL, MEP1A, MEP1B
		nas-23	-5.33	1.39e-05	0.0004	-6.01	2.79e-06	0.0001	-3.68	0.0001	0.0041	-	-	-	-	-	-	Zinc metalloproteinase nas-23	MEP1A, MEP1B
		nas-27	-5.81	1.53e-06	0.0002	-8.25	1.75e-07	3e-05	-4.15	8.82e-06	0.0012	-	-	-	-	-	-	Zinc metalloproteinase nas-27	MEP1A, MEP1B
		nas-30	-2.99	2.67e-06	0.0002	-2.5	2.34e-06	0.0001	-	-	-	-	-	-	-	-	-	Zinc metalloproteinase nas-30	MEP1A, MEP1B
		nas-36	-6.25	7.55e-06	0.0003	-6.14	1.46e-06	7.8e-05	-3.38	0.0004	0.0073	-	-	-	-	-	-	Zinc metalloproteinase nas-36	MEP1A, MEP1B
		nas-6	-2.03	0.0034	0.0181	-2.51	0.0002	0.002	-	-	-	-	-	-	-	-	-	Metalloendopeptidase	ASTL, MEP1A, MEP1B
		nas-7	-3.64	6.8e-06	0.0003	-3.24	4.22e-06	0.0001	-2.03	0.0015	0.0173	-	-	-	-	-	-	Zinc metalloproteinase nas-7	ASTL, MEP1A, MEP1B
		nas-8	-3.92	3.46e-06	0.0002	-3.48	4.35e-06	0.0001	-2.17	0.0005	0.0084	-	-	-	-	-	-	Zinc metalloproteinase nas-8	ASTL
		nas-9	3.16	0.001	0.0069	3.81	0.0002	0.0014	2.86	0.0018	0.0195	-	-	-	-	-	-	Zinc metalloproteinase nas-9	-
Signaling pathways	Wnt signaling	dsh-2	2.08	1.61e-05	0.0005	2.12	7.01e-06	0.0002	-	-	-	-	-	-	-	-	-	DiSHevelled related	DVL1, DVL2, DVL3, DIXDC1
		egl-20	-2.6	1.82e-05	0.0005	-2.68	5.84e-06	0.0002	-	-	-	-	-	-	-	-	-	hypothetical protein	WNT9A, WNT9B, WNT11, WNT16
		mom-2	3.51	1.85e-06	0.0002	3.73	6.05e-07	5.27e-05	2.83	9.49e-06	0.0012	-	-	-	-	-	-	Protein mom-2	WNT9A, WNT9B, WNT11
		sys-1	2.43	3.36e-05	0.0007	2.17	0.0002	0.0014	-	-	-	-	-	-	-	-	-	SYmmetrical Sister cell hermaphrodite gonad defect	-
		vang-1	2.87	1.55e-06	0.0002	3.3	3.14e-07	3.96e-05	2.08	4.04e-05	0.0025	-	-	-	-	-	-	VANG (Van Gogh/Strabismus planar polarity protein) homolog	VANGL1, VANGL2
	Hedgehog signaling	grd-1	-2.15	0.0119	0.048	-2.94	0.0009	0.0055	-	-	-	-	-	-	-	-	-	GRounDhog (hedgehog-like family)	-
		grd-14	-4.39	4.57e-07	9.14e-05	-3.21	1.48e-06	7.84e-05	-2.14	0.0002	0.0048	-2.05	0.0005	0.033	-	-	-	GRounDhog (hedgehog-like family)	-
		grd-2	-2.99	0.0078	0.0344	-4.88	0.0008	0.0049	-	-	-	-	-	-	-	-	-	GRounDhog (hedgehog-like family)	DHH
		grd-3	3.71	0.0005	0.0039	3.21	0.0005	0.0034	3.15	0.0012	0.0152	-	-	-	-	-	-	GRounDhog (hedgehog-like family)	-
		grd-5	-2.25	1.05e-05	0.0004	-2	6.37e-06	0.0002	-	-	-	-	-	-	-	-	-	GRounDhog (hedgehog-like family)	-
		grd-6	-5.44	3.5e-07	8.43e-05	-4.93	2.18e-07	3.36e-05	-	-	-	-2.8	4.14e-05	0.0087	-2.54	4.36e-05	0.006	GRounDhog (hedgehog-like family)	-
		grl-16	-6.01	3.25e-07	8.37e-05	-8.27	1.38e-08	8.71e-06	-	-	-	-3.18	3.77e-05	0.0082	-4.38	9.69e-07	0.0008	GRound-Like (grd related)	-
		grl-27	-7.82	1.08e-08	1.28e-05	-8.81	2.12e-09	3.79e-06	-5.91	4.35e-08	7.21e-05	-	-	-	-	-	-	GRound-Like (grd related)	-
		grl-5	-3.42	0.0014	0.0092	-5.17	7.09e-05	0.0008	-	-	-	-	-	-	-5.38	0.0002	0.0122	GRound-Like (grd related)	-
		hhat-1	-3.63	0.0009	0.0063	-3.89	0.0003	0.0021	-	-	-	-	-	-	-3.57	0.0011	0.0371	Homolog of Hedgehog AcylTransferase	HHAT, HHATL
		hog-1	-3.04	0.0024	0.0135	-3.75	0.0003	0.0024	-	-	-	-	-	-	-	-	-	HOG only (Hedgehog Hog domain alone)	-
		phg-1	-5.75	7.17e-06	0.0003	-6.45	1.57e-06	8.06e-05	-	-	-	-3.42	0.0003	0.024	-3.84	6.86e-05	0.0078	Growth arrest-specific protein 1 homolog	GAS1
		ptc-3	-2.54	0.0013	0.0084	-3.16	9.09e-05	0.0009	-	-	-	-	-	-	-2.91	0.0004	0.0208	PaTChed family	PTCH1, PTCH2
		ptr-1	-3.94	0.0008	0.0058	-4.36	0.0002	0.0019	-	-	-	-	-	-	-4.32	0.0006	0.0258	PaTched Related family	PTCHD1, PTCHD3, PTCHD4
		ptr-11	-3.23	0.0005	0.004	-4.1	5.95e-05	0.0007	-	-	-	-	-	-	-3	0.0011	0.0378	PaTched Related family	PTCHD1, PTCHD3, PTCHD4
		ptr-16	-2.91	0.0049	0.0238	-3.92	0.0004	0.0026	-	-	-	-	-	-	-3.7	0.001	0.0344	PaTched Related family	PTCHD1, PTCHD3, PTCHD4
		ptr-18	-4.31	0.0002	0.0018	-6.93	6.48e-06	0.0002	-	-	-	-3.77	0.0007	0.0365	-6.05	3.45e-05	0.0052	PaTched Related family	PTCHD1, PTCHD3, PTCHD4
		ptr-23	-3.08	1.35e-06	0.0001	-2.97	6.74e-07	5.46e-05	-	-	-	-2.18	7.24e-05	0.0119	-2.1	5.28e-05	0.0066	PaTched Related family	PTCHD1, PTCHD3, PTCHD4
		ptr-3	-3.09	2.95e-05	0.0006	-2.2	0.0002	0.0018	-	-	-	-	-	-	-	-	-	PaTched Related family	PTCHD1, PTCHD3, PTCHD4
		ptr-4	-3.45	0.0019	0.0114	-5.29	0.0001	0.0012	-	-	-	-	-	-	-6.57	0.0001	0.0121	PaTched Related family	PTCHD1, PTCHD3, PTCHD4
		qua-1	-2.93	0.0024	0.0136	-3.74	0.0003	0.0021	-	-	-	-4.15	0.0007	0.0366	-5.29	0.0001	0.0099	QUAhog (hedgehog related)	FLG, FLG2, HRNR
		wrt-10	-3.32	3.54e-05	0.0007	-2.92	7.51e-05	0.0008	-	-	-	-5.23	4.46e-06	0.0033	-4.61	6.98e-06	0.0021	WaRThog (hedgehog-like family)	-
		wrt-2	-2.81	0.0026	0.0144	-3.09	0.0006	0.0042	-	-	-	-5.52	0.0002	0.0175	-6.08	4.56e-05	0.0061	WaRThog (hedgehog-like family)	DHH, IHH, SHH
		wrt-4	-6.58	1.02e-05	0.0004	-8.96	9.39e-07	6.31e-05	-	-	-	-4.13	0.0002	0.0219	-5.62	2.18e-05	0.0039	Warthog protein 4 N-product	DHH, IHH, SHH
		wrt-6	-5.62	8.31e-05	0.0012	-9.56	3.22e-06	0.0001	-	-	-	-	-	-	-5.78	8e-05	0.0086	Warthog protein 6	DHH, IHH, SHH
		wrt-8	-5.54	2.73e-05	0.0006	-5.2	2.21e-05	0.0003	-	-	-	-	-	-	-	-	-	Warthog protein 8 N-product	DHH, IHH, SHH
		wrt-9	-3.66	0.0004	0.0036	-5.8	1.12e-05	0.0002	-	-	-	-	-	-	-4.97	6.37e-05	0.0076	WaRThog (hedgehog-like family)	DHH, IHH, SHH
	RTK/Ras/MAPK	egl-18	2.67	3.42e-06	0.0002	2.28	1.03e-05	0.0002	-	-	-	-	-	-	-	-	-	hypothetical protein	GATA1, GATA2, GATA3, GATA4, GATA5, GATA6, TRPS1
		lin-3	2.06	2.01e-05	0.0005	2.22	6.72e-06	0.0002	-	-	-	-	-	-	-	-	-	Protein lin-3	-
		lip-1	2.24	3.08e-07	8.03e-05	2.18	1.07e-07	2.28e-05	-	-	-	-	-	-	-	-	-	Lateral-signal-Induced Phosphatase	DUSP6, DUSP7, DUSP9
		lst-1	2.01	5.03e-07	9.55e-05	2	1.95e-07	3.15e-05	-	-	-	-	-	-	-	-	-	Lateral Signaling Target	-
	Notch signaling	apx-1	2.38	1.61e-05	0.0005	2.12	2.07e-05	0.0003	2.08	6.82e-05	0.0031	-	-	-	-	-	-	Anterior pharynx in excess protein 1	-
		glp-1	2.17	3.83e-05	0.0007	2.44	7.04e-06	0.0002	-	-	-	-	-	-	-	-	-	Protein glp-1	NOTCH1, NOTCH2, NOTCH3, NOTCH4
		hop-1	2.89	5.63e-05	0.0009	3.07	1.97e-05	0.0003	2.19	0.001	0.013	-	-	-	-	-	-	Presenilin hop-1	PSEN1, PSEN2
		lag-1	2.09	3.89e-05	0.0007	2.32	7.67e-06	0.0002	-	-	-	-	-	-	-	-	-	Lin-12 And Glp-1 phenotype	RBPJ, RBPJL
Epigenetics		arid-1	2.09	4.06e-05	0.0008	2.09	1.6e-05	0.0003	-	-	-	-	-	-	-	-	-	ARID (AT-rich Interactive Domain-containing protein) homolog	ARID4A, ARID4B, ARID5A, ARID5B
		cec-7	2.08	1.88e-06	0.0002	2.19	5.55e-07	5.09e-05	-	-	-	-	-	-	-	-	-	C.Elegans Chromodomain protein	-
		dot-1.3	-2.25	4.42e-05	0.0008	-2.76	3.35e-06	0.0001	-	-	-	-	-	-	-	-	-	Histone-lysine N-methyltransferase, H3 lysine-79 specific	DOT1L
		hda-2	2.11	3.71e-05	0.0007	2.11	6.22e-05	0.0007	-	-	-	-	-	-	-	-	-	Putative histone deacetylase 2	HDAC8
		jmjd-2	2.28	3.25e-06	0.0002	2.4	8.78e-07	6.18e-05	-	-	-	-	-	-	-	-	-	Lysine-specific demethylase 4	KDM4A, KDM4B, KDM4C, KDM4D, KDM4E
		lsd-1	3.89	5.34e-07	9.57e-05	4.24	1.11e-07	2.29e-05	3.09	3.45e-06	0.0007	-	-	-	-	-	-	Lysine-Specific histone Demethylase homolog	KDM1A
		mbtr-1	2.54	7.69e-07	0.0001	2.58	2.56e-07	3.61e-05	-	-	-	-	-	-	-	-	-	Malignant brain tumor repeat protein 1	L3MBTL2, MBTD1, SFMBT1, SFMBT2
		mes-4	2.01	5.26e-06	0.0003	2.1	1.15e-06	6.92e-05	-	-	-	-	-	-	-	-	-	Histone-lysine N-methyltransferase mes-4	NSD1, NSD2, NSD3, SETBP1
		set-12	2.75	2.69e-07	7.29e-05	2.62	2.96e-07	3.92e-05	2.17	3.08e-06	0.0007	-	-	-	-	-	-	Histone-lysine N-methyltransferase	SETD2
		set-18	-2.03	6.03e-06	0.0003	-2.14	7.87e-07	5.82e-05	-	-	-	-	-	-	-	-	-	SET (trithorax/polycomb) domain containing	SMYD1, SMYD2, SMYD3
		set-30	-2.23	1.12e-06	0.0001	-2.29	4.15e-07	4.46e-05	-	-	-	-	-	-	-	-	-	SET (trithorax/polycomb) domain containing	SMYD1, SMYD2, SMYD3
		swd-2.1	2.08	6.94e-05	0.001	2.23	1.05e-05	0.0002	-	-	-	-	-	-	-	-	-	Set1 WD40 repeat protein homolog	WDR82
Transcription factors and nuclear receptors		efl-1	2.17	1.1e-06	0.0001	2.05	1e-06	6.45e-05	-	-	-	-	-	-	-	-	-	E2F-like (mammalian transcription factor)	E2F2, E2F3, E2F4, E2F5
		flh-3	8.04	8.92e-08	3.84e-05	6.94	6.49e-08	1.77e-05	2.93	4.07e-05	0.0025	2.74	0.0001	0.0161	2.37	0.0002	0.0156	FLYWCH zinc finger transcription factor homolog	-
		nhr-2	5.68	5.39e-07	9.57e-05	4.73	5.46e-07	5.06e-05	3.48	1.17e-05	0.0014	-	-	-	-	-	-	Nuclear hormone receptor family member nhr-2	PPARA, PPARD, PPARG
RNA interference		drsh-1	2.15	0.0069	0.0314	2.15	0.0038	0.0172	-	-	-	-	-	-	-	-	-	Ribonuclease 3	DROSHA
		haf-9	-2.72	3.44e-06	0.0002	-2.7	1.69e-06	8.46e-05	-	-	-	-	-	-	-	-	-	HAlF transporter (PGP related)	ABCB9, TAP1, TAP2
		mut-2	2.6	9.74e-06	0.0004	2.75	3.41e-06	0.0001	-	-	-	-	-	-	-	-	-	MUTator	MTPAP, TUT1
		nyn-2	2.1	1.9e-05	0.0005	2.26	3.78e-06	0.0001	-	-	-	-	-	-	-	-	-	NYN domain ribonuclease homolog	-
		rrf-2	2.24	1e-05	0.0004	2.17	1.02e-05	0.0002	2.65	1.54e-06	0.0005	-	-	-	-	-	-	RNA-dependent RNA polymerase Family	LDHD
		wht-1	-2.71	7.53e-05	0.0011	-2.84	2.07e-05	0.0003	-	-	-	-	-	-	-2.1	0.001	0.0351	ABC transporter ATP-binding protein/permease wht-1	ABCG1, ABCG2, ABCG4, ABCG8
