# Supplementary material for: Transcriptomic Analysis Reveals JAK2/MPL-Independent Effects of Calreticulin Mutations in a C. elegans Model
Source: Cells. 2023 Jan 2;12(1):186. doi: 10.3390/cells12010186 (PMC9818371; doi:10.3390/cells12010186)
Supplement: Supplementary file 1 [file cells-12-00186-s001.zip › Table S8.xlsx]

## Sheet: Hoja1
	Table S8. Results of microarray analysis when comparing CRT-1(KO) vs CRT-1(WT)
	ID	CRT-1(KO) Avg (log2)	WT Avg (log2)	Fold Change	P-val	FDR P-val	Gene Symbol	Description
	18598977	6.41	11.88	-44.26	1.25e-13	3.56e-09	crt-1	Calreticulin
	18635457	7.68	2.6	33.73	1.44e-11	2.05e-07
	18587327	3.09	6.94	-14.4	2.91e-11	2.76e-07	pud-3	Protein Up-regulated in Daf-2(gf)
	18567233	3.81	8.12	-19.77	9.4e-10	5.34e-06	pud-4	Protein Up-regulated in Daf-2(gf)
	18574918	9.9	6.14	13.56	8.54e-10	5.34e-06	tbb-6	TuBulin, Beta
	18566617	5.49	8.12	-6.2	1.98e-09	8.69e-06	cpt-5	Carnitine Palmitoyl Transferase
	18589254	7.44	10.55	-8.63	2.14e-09	8.69e-06	F35E12.5	hypothetical protein
	18567238	8.09	12.08	-15.9	4.88e-09	1.73e-05	pud-1.2; pud-1.1	Protein Up-regulated in Daf-2(gf)
	18598700	7.82	11.65	-14.22	6e-09	1.89e-05	pud-1.2; pud-1.1	Protein Up-regulated in Daf-2(gf)
	18567241	8.7	12.09	-10.49	1.83e-08	4.57e-05	pud-2.2; pud-2.1	Protein Up-regulated in Daf-2(gf)
	18587324	8.7	12.09	-10.49	1.83e-08	4.57e-05	pud-2.2; pud-2.1	Protein Up-regulated in Daf-2(gf)
	18486262	8.33	11.4	-8.42	2.41e-08	4.57e-05	sdz-24	SKN-1 Dependent Zygotic transcript
	18533847	8.8	10.55	-3.35	2.38e-08	4.57e-05	C17H12.8	hypothetical protein
	18539225	6.62	8.61	-3.98	2.32e-08	4.57e-05	clec-67	C-type LECtin
	18632549	8.06	5.89	4.52	2.22e-08	4.57e-05	ceh-39	Homeobox protein ceh-39
	18629301	10.25	11.89	-3.11	4.02e-08	7.13e-05	asp-14	ASpartyl Protease
	18549409	8.6	10.41	-3.52	4.57e-08	7.21e-05	dod-24	Downstream Of DAF-16 (regulated by DAF-16)
	18589752	6.51	9.07	-5.91	4.35e-08	7.21e-05	grl-27	GRound-Like (grd related)
	18476062	5.26	7.45	-4.57	5.15e-08	7.69e-05	haf-6	HAlF transporter (PGP related)
	18478611	9.58	11.95	-5.17	6.02e-08	8.55e-05	pho-11	Putative acid phosphatase 11
	18588830	5.81	3.93	3.68	7.75e-08	0.0001	F29G9.14	ncRNA
	18527591	8.63	10.07	-2.71	8.12e-08	0.0001	T16G12.1	hypothetical protein
	18495737	7.37	8.64	-2.42	1.16e-07	0.0001	C44B7.11	Putative endoplasmic reticulum metallopeptidase 1-B
	18507925	10.24	8.27	3.92	1.09e-07	0.0001	ckb-2	Choline kinase B2
	18536463	7.08	9.87	-6.95	1.11e-07	0.0001	F08G5.6	hypothetical protein
	18553225	6.46	7.87	-2.66	1.16e-07	0.0001	F55G11.2	hypothetical protein
	18601602	6.97	9.27	-4.91	1.03e-07	0.0001	ugt-6	UDP-glucuronosyltransferase
	18489178	5.02	6.66	-3.12	1.34e-07	0.0001	T25E4.1	hypothetical protein
	18563297	8.66	10.56	-3.74	1.26e-07	0.0001	asp-10	ASpartyl Protease
	18627561	6.7	8.66	-3.9	1.34e-07	0.0001	drd-5	dietary restriction down regulated
	18517212	7.82	4.98	7.13	1.55e-07	0.0001	Y41C4A.11	hypothetical protein
	18586880	7.88	11.22	-10.08	1.51e-07	0.0001	fat-7	Delta(9)-fatty-acid desaturase fat-7
	18566718	8.48	10.74	-4.82	1.79e-07	0.0001	F10A3.4	hypothetical protein
	18618819	7.11	5.38	3.32	1.76e-07	0.0001	tag-52	Putative protein tag-52
	18493867	7.09	8.5	-2.66	1.97e-07	0.0002	math-4	MATH (meprin-associated Traf homology) domain containing
	18480145	8.92	10.88	-3.89	2.24e-07	0.0002	C30G12.2	hypothetical protein
	18582873	6.27	4.52	3.37	2.6e-07	0.0002	C06H2.7	hypothetical protein
	18547893	7.05	9.08	-4.09	2.87e-07	0.0002	clec-52	C-type LECtin
	18619060	4.52	6.76	-4.7	3.18e-07	0.0002	C04E7.3	hypothetical protein
	18534616	4.54	6.17	-3.1	3.35e-07	0.0002	C32H11.3	hypothetical protein
	18584428	5.8	8.42	-6.14	3.18e-07	0.0002	ech-1.1	Enoyl-CoA Hydratase
	18611717	6.9	4.99	3.76	3.29e-07	0.0002	mes-1	Maternal Effect Sterile
	18622777	6.42	7.65	-2.34	3.22e-07	0.0002	flr-1	hypothetical protein
	18551642	9.71	10.96	-2.38	3.82e-07	0.0002	pcp-3	Prolyl Carboxy Peptidase like
	18586012	9.88	11.47	-3.01	3.73e-07	0.0002	ttr-44	TransThyretin-Related family domain
	18478908	6.64	8.24	-3.03	3.93e-07	0.0002	C08E3.1	hypothetical protein
	18615564	6.46	8.7	-4.75	4.14e-07	0.0002	col-170	COLlagen
	18631349	7.94	9.22	-2.44	4.14e-07	0.0002	spp-4	SaPosin-like Protein family
	18619063	4.03	5.36	-2.52	4.36e-07	0.0003	C04E7.4	hypothetical protein
	18576575	4.25	6.95	-6.49	4.7e-07	0.0003	wago-10	Piwi-like protein
	18568457	6.2	4.71	2.8	4.72e-07	0.0003	F26G5.1	hypothetical protein
	18620658	7.3	8.45	-2.21	5.06e-07	0.0003	C28G1.5	hypothetical protein
	18622488	5.17	6.79	-3.09	4.99e-07	0.0003	nspc-17	Nematode Specific Peptide family, group C
	18570305	5.91	7.96	-4.14	5.29e-07	0.0003	lipl-2	Lipase
	18592238	7.96	6.24	3.28	5.45e-07	0.0003	H19N07.3	hypothetical protein
	18604307	8.63	9.69	-2.08	5.49e-07	0.0003	fln-2	FiLamiN (actin binding protein) homolog
	18492671	8.33	6.45	3.68	5.79e-07	0.0003	ZK970.7	hypothetical protein
	18540381	4.89	6.58	-3.22	5.81e-07	0.0003	K08D10.14	hypothetical protein
	18532321	3.52	5.38	-3.62	6.03e-07	0.0003	fbxa-6	F-box A protein
	18540635	7.09	8.61	-2.87	6.2e-07	0.0003	dod-17	Downstream Of DAF-16 (regulated by DAF-16)
	18603351	8.37	9.51	-2.22	6.26e-07	0.0003	nuc-1	Deoxyribonuclease-2
	18611847	6.82	7.99	-2.25	6.63e-07	0.0003	F55F3.2	Carboxylic ester hydrolase
	18589632	9.66	11.71	-4.14	6.81e-07	0.0003	folt-2	Folate-like transporter 2
	18635443	10.03	8.78	2.38	6.96e-07	0.0003
	18545113	6.89	8.36	-2.76	7.3e-07	0.0003	Y54G2A.45	hypothetical protein
	18551393	6.23	4.43	3.47	7.3e-07	0.0003	his-31	Histone H4
	18622486	4.77	7.1	-5.03	7.65e-07	0.0003	nspc-18	Nematode Specific Peptide family, group C
	18506135	7.76	8.88	-2.17	8.47e-07	0.0004	gst-26	Glutathione S-Transferase
	18548568	5.85	7.06	-2.31	8.66e-07	0.0004	C08F11.13	hypothetical protein
	18569727	9.31	10.67	-2.57	9.05e-07	0.0004	aqp-4	AQuaPorin or aquaglyceroporin related
	18623658	6.73	7.8	-2.1	8.81e-07	0.0004	otpl-3	OToPetrin-Like
	18626663	4.45	3.41	2.05	9.05e-07	0.0004	F48B9.9	ncRNA
	18488051	7.58	8.75	-2.25	9.44e-07	0.0004	T06D8.3	hypothetical protein
	18571247	6.11	7.89	-3.44	9.42e-07	0.0004	F56A4.3	hypothetical protein
	18575180	5.46	6.52	-2.08	9.57e-07	0.0004	T06E4.14	hypothetical protein
	18465047	8.3	6.66	3.13	1.03e-06	0.0004	C04F12.1	hypothetical protein
	18579916	7.39	8.68	-2.46	1.04e-06	0.0004	abu-4	Activated in Blocked Unfolded protein response
	18592394	8.98	6.51	5.56	1.04e-06	0.0004	cdr-4	CaDmium Responsive
	18633101	10.17	11.39	-2.33	1.03e-06	0.0004	Y16B4A.2	Carboxypeptidase
	18624453	9.89	11.06	-2.25	1.08e-06	0.0004	ilys-5	Invertebrate LYSozyme
	18613159	6.37	5.01	2.57	1.14e-06	0.0004	K08H2.3	hypothetical protein
	18621920	7.03	8.09	-2.09	1.13e-06	0.0004	cdd-1	CytiDine Deaminase
	18511895	6.68	7.78	-2.14	1.23e-06	0.0004	F42A10.9	hypothetical protein
	18579173	5.32	7.06	-3.34	1.27e-06	0.0004	Y45G12C.1	hypothetical protein
	18548380	5.23	6.5	-2.41	1.38e-06	0.0005	C06A6.7	hypothetical protein
	18524068	7.73	9.22	-2.8	1.4e-06	0.0005	F42A10.6	hypothetical protein
	18625642	7.65	5.96	3.23	1.44e-06	0.0005	F41B4.3	hypothetical protein
	18573043	7.23	5.34	3.71	1.63e-06	0.0005	K09D9.1	hypothetical protein
	18471935	6.66	5.25	2.65	1.54e-06	0.0005	rrf-2	RNA-dependent RNA polymerase Family
	18517848	8.82	9.83	-2.01	1.53e-06	0.0005	Y49E10.16	hypothetical protein
	18558681	8.37	9.49	-2.17	1.54e-06	0.0005	gba-4	Putative glucosylceramidase 4
	18588191	5.07	4.04	2.04	1.62e-06	0.0005	egl-1	Programmed cell death activator egl-1
	18603369	10.02	11.18	-2.23	1.6e-06	0.0005	C07D8.6	hypothetical protein
	18616430	9.74	10.8	-2.08	1.6e-06	0.0005	nep-22	NEPrilysin metallopeptidase family
	18620203	8.36	9.52	-2.22	1.59e-06	0.0005	ugt-23	UDP-glucuronosyltransferase
	18567017	4.76	6.21	-2.72	1.66e-06	0.0005	F14D7.6	hypothetical protein
	18599099	4.04	2.97	2.1	1.68e-06	0.0005	Y38H6C.21	hypothetical protein
	18587972	6.55	8.13	-3	1.71e-06	0.0005	F21C10.9	hypothetical protein
	18551650	8.65	10.35	-3.25	1.73e-06	0.0005	pcp-2	Prolyl Carboxy Peptidase like
	18489186	7.6	9.02	-2.68	1.95e-06	0.0005	gst-13	Glutathione S-Transferase
	18505048	9.76	7.94	3.52	2.01e-06	0.0005	Y38E10A.14	hypothetical protein
	18553668	7.12	8.29	-2.26	1.99e-06	0.0005	H06H21.8	hypothetical protein
	18573000	4.11	5.13	-2.03	1.94e-06	0.0005	K09C6.2	hypothetical protein
	18606355	6.39	4.27	4.35	1.9e-06	0.0005	C49F5.6	hypothetical protein
	18611572	6.21	7.24	-2.04	1.94e-06	0.0005	F53H8.3	hypothetical protein
	18621635	8.43	9.52	-2.14	2.01e-06	0.0005	ifp-1	Intermediate filament protein ifp-1
	18630129	7.56	8.89	-2.52	1.98e-06	0.0005	ifd-1	Intermediate filament protein ifd-1
	18485924	9.05	7.67	2.6	2.27e-06	0.0006	tdc-1	Tyrosine decarboxylase
	18571252	5.26	6.87	-3.05	2.31e-06	0.0006	F56A4.4; Y45G12C.3	hypothetical protein
	18579195	5.26	6.87	-3.05	2.31e-06	0.0006	F56A4.4; Y45G12C.3	hypothetical protein
	18595432	6.19	4.42	3.41	2.33e-06	0.0006	pzf-1	Paired Zinc Finger protein
	18635583	7.25	5.76	2.79	2.31e-06	0.0006
	18487953	6.71	5.67	2.06	2.44e-06	0.0006	T05H10.4	hypothetical protein
	18506684	7.07	8.41	-2.52	2.47e-06	0.0006	ZC204.12	hypothetical protein
	18564092	9.24	10.27	-2.04	2.42e-06	0.0006	C29F3.7	hypothetical protein
	18593909	8.92	10.13	-2.3	2.38e-06	0.0006	ugt-47	Putative UDP-glucuronosyltransferase ugt-47
	18588389	5.34	6.49	-2.21	2.5e-06	0.0006	slc-17.8	SLC (SoLute Carrier) homolog
	18511149	4.78	6.11	-2.51	2.54e-06	0.0006	F23F12.13	hypothetical protein
	18630661	9.4	10.5	-2.14	2.68e-06	0.0006	R193.2	hypothetical protein
	18582764	6.11	8.25	-4.38	2.71e-06	0.0006	cyp-35C1	CYtochrome P450 family
	18553377	9.3	10.74	-2.7	2.81e-06	0.0006	lys-4	LYSozyme
	18603118	6.75	8.04	-2.45	2.97e-06	0.0007	amt-4	Ammonium transporter
	18591546	7.49	10.11	-6.13	3.03e-06	0.0007	col-156	COLlagen
	18629185	5.05	3.93	2.17	3.08e-06	0.0007	set-12	Histone-lysine N-methyltransferase
	18468865	6.64	7.76	-2.18	3.28e-06	0.0007	F30F8.5	hypothetical protein
	18493211	8.45	9.59	-2.2	3.47e-06	0.0007	nhx-2	Na(+)/H(+) exchanger protein 2
	18615401	6.37	4.74	3.09	3.45e-06	0.0007	lsd-1	Lysine-Specific histone Demethylase homolog
	18606667	7.26	8.78	-2.88	3.52e-06	0.0007	C54D2.1	hypothetical protein
	18594950	4.8	6.22	-2.67	3.67e-06	0.0008	T02B5.3	Carboxylic ester hydrolase
	18490455	7.23	8.39	-2.23	3.73e-06	0.0008	spds-1	SPermiDine Synthase
	18520846	8.02	9.12	-2.14	3.71e-06	0.0008	C05D2.8	hypothetical protein
	18512989	4.73	3.41	2.51	3.99e-06	0.0008	F59B2.12	hypothetical protein
	18501709	8	9.56	-2.94	3.98e-06	0.0008	R03C1.1	hypothetical protein
	18473952	7.07	8.45	-2.61	3.88e-06	0.0008	lbp-5	Fatty acid-binding protein homolog 5
	18510959	9.07	6.94	4.36	3.89e-06	0.0008	col-98	COLlagen
	18542252	7.38	5.43	3.86	3.94e-06	0.0008	cav-1	Caveolin
	18585314	6.49	8.5	-4.04	3.99e-06	0.0008	C50B6.7	Alpha-amylase
	18556504	5.08	6.85	-3.42	4.04e-06	0.0008	T22D1.11	hypothetical protein
	18533547	4.64	3.3	2.54	4.07e-06	0.0008	C09G12.5	hypothetical protein
	18475981	8.76	6.77	3.96	4.2e-06	0.0008
	18556780	8.74	9.98	-2.36	4.33e-06	0.0008	T28F3.8	hypothetical protein
	18580589	5.44	7.23	-3.45	4.4e-06	0.0008	cln-3.3	Battenin
	18619284	4.71	6.01	-2.47	4.5e-06	0.0008	C06E2.1	hypothetical protein
	18546937	6.53	4.76	3.42	4.63e-06	0.0009	ZC168.2	hypothetical protein
	18588323	5.31	6.38	-2.09	4.64e-06	0.0009	amx-3	AMine oXidase family
	18611594	6.35	8.3	-3.87	4.67e-06	0.0009	F54B11.11	hypothetical protein
	18562755	9.09	7.62	2.76	4.96e-06	0.0009	catp-3	Cation transporting ATPase
	18629588	5.83	7.35	-2.87	5.29e-06	0.001	M153.2	hypothetical protein
	18492805	8.28	9.35	-2.1	5.43e-06	0.001	B0228.7	S-methyl-5-thioadenosine phosphorylase
	18528749	6.27	7.49	-2.32	5.46e-06	0.001	Y1A5A.1	hypothetical protein
	18459361	9.21	10.99	-3.44	5.65e-06	0.001	T10E9.3	hypothetical protein
	18543279	8.2	9.36	-2.24	5.76e-06	0.001	pqn-76; abu-5; pqn-78	Prion-like-(Q/N-rich)-domain-bearing protein; Activated in Blocked Unfolded protein response
	18633764	6.67	5.52	2.22	5.86e-06	0.001	ZC53.1	hypothetical protein
	18578973	5.95	7.15	-2.31	6e-06	0.001	Y43F8B.3	hypothetical protein
	18568976	7.08	6.07	2.01	6.08e-06	0.001	best-14	Bestrophin homolog 14
	18598228	7.8	6.65	2.23	6.12e-06	0.001	W09D12.1	hypothetical protein
	18485698	8.93	7.93	2.01	6.18e-06	0.001	gbas-1	Ga Binding and Activating and Spk (SPK) domain containing
	18587902	8.88	9.88	-2	6.35e-06	0.0011	F20G2.2	hypothetical protein
	18557521	10.22	11.81	-3	6.54e-06	0.0011	col-120	COLlagen
	18539068	7.2	8.53	-2.51	6.51e-06	0.0011	F55G11.8	hypothetical protein
	18560391	4.02	5.78	-3.38	6.48e-06	0.0011	pqn-90	Prion-like-(Q/N-rich)-domain-bearing protein
	18591565	7.1	8.21	-2.16	6.67e-06	0.0011	gfi-1	GEI-4 (Four) Interacting protein
	18539486	6.97	8.09	-2.18	6.82e-06	0.0011	F58G6.7	hypothetical protein
	18633148	7.91	6.79	2.17	6.81e-06	0.0011	ekl-5	hypothetical protein
	18524073	8.81	10.13	-2.5	7.03e-06	0.0011	F42A10.7	hypothetical protein
	18570978	5.56	7.06	-2.84	7.24e-06	0.0011	lipl-1	Lipase
	18602245	5.91	7.16	-2.38	7.39e-06	0.0011	B0272.4	hypothetical protein
	18501495	6.04	7.42	-2.59	7.51e-06	0.0011	lact-4	beta-LACTamase domain containing
	18485735	5.64	3.19	5.45	7.71e-06	0.0011	F59H6.3	hypothetical protein
	18519200	5.05	6.62	-2.98	7.93e-06	0.0011	ZC21.3	hypothetical protein
	18562596	4	5.27	-2.41	7.85e-06	0.0011	fbxa-157	F-box A protein
	18588649	8.73	10.66	-3.81	8.01e-06	0.0011	asp-13	ASpartyl Protease
	18604404	5.97	7.5	-2.89	7.88e-06	0.0011	C23H4.3	hypothetical protein
	18488681	9.79	10.83	-2.06	8.25e-06	0.0012	T19D12.1	hypothetical protein
	18476090	9.3	10.65	-2.55	8.36e-06	0.0012	Y48G8AL.16	hypothetical protein
	18586386	5.64	6.94	-2.46	8.59e-06	0.0012	cln-3.1	Battenin
	18487533	3.79	5.42	-3.1	8.89e-06	0.0012	math-35	MATH (meprin-associated Traf homology) domain containing
	18503713	5.58	7.64	-4.15	8.82e-06	0.0012	nas-27	Zinc metalloproteinase nas-27
	18535532	5.79	7.02	-2.34	8.84e-06	0.0012	C49A9.6	hypothetical protein
	18587135	6.03	4.81	2.33	8.74e-06	0.0012	F14D7.2	hypothetical protein
	18605568	6.84	5.75	2.13	8.91e-06	0.0012	meg-4	hypothetical protein
	18625016	7.66	5.42	4.72	8.96e-06	0.0012	F31F6.1	hypothetical protein
	18580224	5.66	4.46	2.29	9.12e-06	0.0012	ztf-25	Zinc finger putative Transcription Factor family
	18569519	10.95	9.45	2.83	9.49e-06	0.0012	mom-2	Protein mom-2
	18482671	7	5.44	2.96	9.69e-06	0.0013	F19B10.5	hypothetical protein
	18578657	6.04	4.77	2.41	1e-05	0.0013	Y39B6A.27	hypothetical protein
	18454469	8.92	10.32	-2.64	1.01e-05	0.0013	col-60	COLlagen
	18555643	7.03	5.35	3.21	1.01e-05	0.0013	T04A11.1; T04A11.4	hypothetical protein
	18555654	7.03	5.35	3.21	1.01e-05	0.0013	T04A11.1; T04A11.4	hypothetical protein
	18628482	6.99	4.86	4.38	9.97e-06	0.0013	meg-2	hypothetical protein
	18496792	9.37	10.48	-2.15	1.02e-05	0.0013	pho-1	intestinal acid PHOsphatase
	18585275	8.31	6.88	2.7	1.04e-05	0.0013	C49G7.10	hypothetical protein
	18481652	7.6	9	-2.62	1.08e-05	0.0013	F07H5.8	hypothetical protein
	18561435	6.37	7.6	-2.34	1.07e-05	0.0013	ugt-1	UDP-GlucuronosylTransferase
	18602815	8.63	10.1	-2.76	1.08e-05	0.0013	nspc-6; nspc-2	Nematode Specific Peptide family, group C
	18619006	8.63	10.1	-2.76	1.08e-05	0.0013	nspc-6; nspc-2	Nematode Specific Peptide family, group C
	18510507	5.71	6.81	-2.14	1.1e-05	0.0013	klo-2	KLOtho (mammalian aging-associated protein) homolog
	18584870	8.63	7.39	2.35	1.13e-05	0.0013	C37C3.9	hypothetical protein
	18635101	8.87	9.95	-2.11	1.13e-05	0.0013
	18526222	9.22	7.93	2.46	1.14e-05	0.0013	egg-2	EGG sterile (unfertilizable)
	18465957	6.14	4.34	3.48	1.17e-05	0.0014	nhr-2	Nuclear hormone receptor family member nhr-2
	18613318	8.25	9.37	-2.18	1.18e-05	0.0014	pbo-4	Na(+)/H(+) exchanger protein 7
	18540695	9.53	10.7	-2.26	1.22e-05	0.0014	LLC1.2	hypothetical protein
	18629144	5.81	3.99	3.55	1.24e-05	0.0014	K09E3.7	hypothetical protein
	18621105	7.5	8.62	-2.17	1.25e-05	0.0014	C34F6.5	hypothetical protein
	18495241	6.63	5.41	2.33	1.34e-05	0.0014	fbxc-32	F-box C protein
	18499489	5.31	7.78	-5.55	1.33e-05	0.0014	F45D11.14; F45D11.15; F45D11.16	hypothetical protein
	18499498	5.31	7.78	-5.55	1.33e-05	0.0014	F45D11.14; F45D11.15; F45D11.16	hypothetical protein
	18499507	5.31	7.78	-5.55	1.33e-05	0.0014	F45D11.14; F45D11.15; F45D11.16	hypothetical protein
	18582922	6.78	8.08	-2.46	1.33e-05	0.0014	ugt-17	UDP-GlucuronosylTransferase
	18602798	8.31	9.52	-2.3	1.33e-05	0.0014	nspc-3	Nematode Specific Peptide family, group C
	18536454	4.77	5.98	-2.32	1.36e-05	0.0015	ugt-65	UDP-GlucuronosylTransferase
	18550294	7.25	8.44	-2.29	1.35e-05	0.0015	C49C3.10	hypothetical protein
	18618930	5.67	6.8	-2.19	1.35e-05	0.0015	C03B1.13	hypothetical protein
	18624172	5.61	7.29	-3.21	1.41e-05	0.0015	F19C6.5	hypothetical protein
	18482964	3.31	4.45	-2.2	1.43e-05	0.0015	F26G1.10	hypothetical protein
	18630081	5.23	4.14	2.13	1.44e-05	0.0015	R04D3.2	hypothetical protein
	18472519	8.66	9.88	-2.34	1.54e-05	0.0016	dhs-3	DeHydrogenases, Short chain
	18557007	4.09	5.45	-2.58	1.56e-05	0.0016	asm-3	Putative sphingomyelin phosphodiesterase asm-3
	18627016	6.93	5.49	2.73	1.55e-05	0.0016	meg-3	hypothetical protein
	18564387	6.59	5.44	2.21	1.59e-05	0.0016	zip-5	bZIP transcription factor family
	18632586	7.39	8.65	-2.4	1.63e-05	0.0016	cgr-1	CRAL/TRIO and GOLD domain suppressor of activated Ras
	18565963	6.57	8.87	-4.92	1.65e-05	0.0016	D1086.3	hypothetical protein
	18601944	10.86	11.87	-2.02	1.68e-05	0.0017	ZK6.11	hypothetical protein
	18582880	5.79	7.12	-2.52	1.72e-05	0.0017	fbxa-156	F-box A protein
	18505077	7.44	5.63	3.52	1.79e-05	0.0017	nspe-6	Nematode Specific Peptide family, group E
	18585365	7.83	5.99	3.59	1.8e-05	0.0017	C50E3.11	hypothetical protein
	18610258	6.68	8.13	-2.75	1.81e-05	0.0017	nspc-12; nspc-15	Nematode Specific Peptide family, group C
	18571464	5.88	7.05	-2.26	1.83e-05	0.0017	F57G8.5	hypothetical protein
	18505570	7.37	8.38	-2.02	1.88e-05	0.0017	Y48B6A.5	Major sperm protein
	18633021	5.92	7.06	-2.21	1.89e-05	0.0017	Y102A11A.7	hypothetical protein
	18543282	6.7	7.84	-2.2	1.91e-05	0.0018
	18601404	6.25	7.5	-2.37	1.92e-05	0.0018	ZC376.3	hypothetical protein
	18474445	8.76	9.77	-2.01	2.01e-05	0.0018	W10C8.5	hypothetical protein
	18529034	8.93	7.86	2.1	2.03e-05	0.0018	unc-71	hypothetical protein
	18567397	8.45	9.89	-2.72	2.05e-05	0.0018	F17C11.6	hypothetical protein
	18540112	5.96	7.47	-2.84	2.06e-05	0.0018	K03H6.2	hypothetical protein
	18478352	5.58	6.63	-2.07	2.2e-05	0.0019	C01B9.1	hypothetical protein
	18488608	5.07	6.5	-2.68	2.19e-05	0.0019	tsp-10	TetraSPanin family
	18598528	9.09	10.15	-2.1	2.2e-05	0.0019	pcp-4	Prolyl Carboxy Peptidase like
	18547796	7.69	9.13	-2.72	2.27e-05	0.0019	B0035.13	hypothetical protein
	18624199	4.16	5.77	-3.06	2.27e-05	0.0019	abu-2	Activated in Blocked Unfolded protein response
	18502392	9.19	10.56	-2.58	2.31e-05	0.0019	abu-11	Activated in Blocked Unfolded protein response
	18613516	4.48	5.6	-2.18	2.31e-05	0.0019	K11E4.2	hypothetical protein
	18494685	6	7.23	-2.34	2.38e-05	0.0019	C18E9.7	hypothetical protein
	18462391	11.01	9.55	2.75	2.39e-05	0.0019	Y51F10.2	hypothetical protein
	18552583	8.9	10.12	-2.32	2.39e-05	0.0019	ifo-1	Intermediate Filament Organize
	18537685	5.24	4.02	2.32	2.47e-05	0.002	F35G2.8	ncRNA
	18552204	6.48	7.62	-2.2	2.46e-05	0.002
	18586626	8.05	5.8	4.76	2.52e-05	0.002	F08F3.6	hypothetical protein
	18551197	6.84	8.14	-2.45	2.56e-05	0.002	F13B6.2	hypothetical protein
	18575177	8.97	10.27	-2.46	2.62e-05	0.002	pqn-63	Prion-like-(Q/N-rich)-domain-bearing protein
	18546040	6.02	7.18	-2.24	2.62e-05	0.002
	18618858	6.89	5.83	2.09	2.62e-05	0.002	C02F12.8	hypothetical protein
	18625208	7.94	6.76	2.26	2.6e-05	0.002	chtl-1	Choline transporter-like protein 1
	18569962	8.36	7.25	2.15	2.64e-05	0.002	F43H9.4	hypothetical protein
	18585574	8.81	7.57	2.35	2.65e-05	0.002	C52A10.1	Carboxylic ester hydrolase
	18591931	7.18	6.09	2.14	2.64e-05	0.002	F59A7.2	hypothetical protein
	18486002	3.64	4.73	-2.12	2.66e-05	0.002	K02E7.6	hypothetical protein
	18587219	5.94	4.7	2.38	2.68e-05	0.002	F14H3.5	hypothetical protein
	18592490	7.47	8.96	-2.81	2.68e-05	0.002	K02E11.7	hypothetical protein
	18454779	7.56	8.59	-2.04	2.69e-05	0.0021	F26A3.5	hypothetical protein
	18518935	6.51	7.76	-2.37	2.72e-05	0.0021	Y75B8A.4	Lon protease homolog 2, peroxisomal
	18568985	6.45	8.57	-4.34	2.76e-05	0.0021	col-152	COLlagen
	18458199	7.07	8.27	-2.31	2.8e-05	0.0021	K12C11.3	hypothetical protein
	18623015	6.34	4.73	3.05	2.83e-05	0.0021	inx-2	Innexin-2
	18635373	7.24	8.7	-2.76	2.85e-05	0.0021
	18550679	8.29	9.62	-2.51	2.88e-05	0.0021	D2096.6	hypothetical protein
	18601975	7.15	8.31	-2.23	2.89e-05	0.0021	lron-2	eLRR (extracellular Leucine-Rich Repeat) ONly
	18561662	10.15	9.09	2.09	2.89e-05	0.0021	acly-2	ATP-citrate synthase
	18489421	8.66	7.46	2.3	2.92e-05	0.0021	osta-3	Organic Solute Transporter Alpha-like protein
	18623159	10.08	8.97	2.17	2.97e-05	0.0022	tts-1	ncRNA
	18577245	10.11	11.24	-2.19	3.04e-05	0.0022	npa-1	Nematode Polyprotein Allergen related
	18452934	11.48	10.34	2.2	3.05e-05	0.0022	gale-1	UDP-GALactose 4-Epimerase
	18568239	8.08	9.2	-2.17	3.07e-05	0.0022	asns-1	Asparagine synthetase
	18471546	10.72	9.71	2.01	3.16e-05	0.0022	egg-6	Leucine-rich repeat-containing protein egg-6
	18606138	9.86	8.25	3.05	3.19e-05	0.0023	C45B2.2	hypothetical protein
	18622594	7.51	6.27	2.37	3.19e-05	0.0023	E02H4.6	hypothetical protein
	18459176	9.3	8.27	2.04	3.25e-05	0.0023	pigv-1	GPI mannosyltransferase pigv-1
	18555172	7.3	5.65	3.15	3.31e-05	0.0023	R09E10.2	hypothetical protein
	18573392	4.06	5.28	-2.34	3.32e-05	0.0023	K12B6.11	hypothetical protein
	18484237	5.54	3.43	4.31	3.36e-05	0.0023	F43G6.10	hypothetical protein
	18486839	5.73	4.42	2.48	3.35e-05	0.0023	M151.3	hypothetical protein
	18581833	5.42	4.24	2.27	3.39e-05	0.0023	tag-38	hypothetical protein
	18490831	7.47	6.19	2.43	3.6e-05	0.0024	Y51B9A.12	ncRNA
	18507015	8.94	10.38	-2.71	3.62e-05	0.0024	ZK1307.1	hypothetical protein
	18556570	7.05	8.15	-2.15	3.54e-05	0.0024	T23F6.3	hypothetical protein
	18512040	8.29	6.86	2.69	3.74e-05	0.0024	F43D9.8	ncRNA
	18552517	10.08	11.14	-2.08	3.72e-05	0.0024	elo-6	Elongation of very long chain fatty acids protein 6
	18606971	4.99	6.23	-2.37	3.74e-05	0.0024	E01G6.3	Carboxylic ester hydrolase
	18560527	6.47	7.74	-2.4	3.81e-05	0.0024	Y94H6A.10	hypothetical protein
	18473698	7.78	6.75	2.04	3.97e-05	0.0024	T27F6.8	hypothetical protein
	18486426	8.65	7.59	2.09	3.9e-05	0.0024	clec-88	C-type LECtin
	18546196	6.33	7.57	-2.35	3.92e-05	0.0024
	18606824	5.95	4.94	2.01	3.91e-05	0.0024	D1005.2	hypothetical protein
	18608850	9.94	8.66	2.43	3.92e-05	0.0024	mrp-4	hypothetical protein
	18616902	7.23	5.41	3.51	3.96e-05	0.0024	W06D11.3	hypothetical protein
	18628330	6.25	5.01	2.36	3.96e-05	0.0024	H29C22.1	hypothetical protein
	18626238	7.79	6.2	3.01	4.01e-05	0.0025	F46F2.3	hypothetical protein
	18631357	7.38	6.37	2.01	4.01e-05	0.0025	nfya-1	Nuclear transcription Factor Y, A (alpha) subunit
	18602379	6.22	5.17	2.08	4.04e-05	0.0025	vang-1	VANG (Van Gogh/Strabismus planar polarity protein) homolog
	18543570	5.5	3.95	2.93	4.07e-05	0.0025	flh-3	FLYWCH zinc finger transcription factor homolog
	18606886	3.8	5.85	-4.13	4.08e-05	0.0025	nspc-19	Nematode Specific Peptide family, group C
	18532049	7.09	5.46	3.1	4.17e-05	0.0025	cdc-25.3	M-phase inducer phosphatase cdc-25.3
	18542829	4.91	5.93	-2.03	4.21e-05	0.0025	W01B6.4	hypothetical protein
	18539496	5.88	6.91	-2.04	4.24e-05	0.0025	F58G6.9	hypothetical protein
	18459781	7.28	8.28	-2	4.31e-05	0.0025	pgrn-1	ProGRaNulin homolog
	18498633	5.45	4.44	2.01	4.33e-05	0.0025	F33H12.7	hypothetical protein
	18500149	6.18	4.55	3.11	4.38e-05	0.0025	F54D5.5	hypothetical protein
	18616578	6.72	7.81	-2.13	4.34e-05	0.0025	ckc-1	Choline Kinase C
	18460946	5.95	7.12	-2.24	4.39e-05	0.0025	Y105E8A.27	hypothetical protein
	18579740	7.16	5.94	2.32	4.41e-05	0.0025	hmit-1.2	H(+) MyoInositol coTransporter
	18507259	6.96	5.51	2.73	4.54e-05	0.0025	try-1	TRYpsin-like protease
	18587225	9.43	7.57	3.64	4.58e-05	0.0026	F14H3.6	hypothetical protein
	18487123	4.85	3.81	2.04	4.71e-05	0.0026	R05H10.1	hypothetical protein
	18541149	6.26	7.62	-2.55	4.78e-05	0.0026	R07C12.2	pseudo
	18561415	7.64	8.74	-2.14	4.9e-05	0.0027	pqn-2	Prion-like-(Q/N-rich)-domain-bearing protein
	18621274	5.48	4.14	2.53	5.13e-05	0.0027	fbxa-170	F-box A protein
	18580845	5.42	4.17	2.39	5.15e-05	0.0027	ugt-18	UDP-glucuronosyltransferase
	18553258	10.49	8.64	3.6	5.18e-05	0.0027	col-103	COLlagen
	18482844	6.94	5.69	2.39	5.21e-05	0.0027	F22E5.17	hypothetical protein
	18480833	4.96	6.4	-2.7	5.29e-05	0.0028	col-68	COLlagen
	18517879	5.21	6.34	-2.19	5.28e-05	0.0028	cccp-1	Conserved Coiled-Coil Protein
	18524754	9.63	8.58	2.07	5.26e-05	0.0028	sod-4	Extracellular superoxide dismutase [Cu-Zn]
	18553006	6.59	7.82	-2.34	5.29e-05	0.0028	F52G2.3	hypothetical protein
	18482836	4.74	5.87	-2.18	5.33e-05	0.0028	F22E5.1	hypothetical protein
	18591632	6.05	4.94	2.16	5.37e-05	0.0028	fbxa-192	F-box A protein
	18462176	8.96	7.77	2.29	5.42e-05	0.0028	Y48G1A.2	hypothetical protein
	18486863	6.03	4.52	2.84	5.65e-05	0.0028	M151.7	hypothetical protein
	18577319	9.31	7.04	4.81	5.64e-05	0.0028	W01F3.2	hypothetical protein
	18452890	5.83	7.29	-2.74	5.83e-05	0.0029	C46H11.2	Flavin-containing monooxygenase
	18581627	7.32	8.53	-2.31	5.85e-05	0.0029	abu-1	Activated in Blocked Unfolded protein response
	18574047	9.11	10.3	-2.29	5.93e-05	0.0029	pqn-54	Prion-like-(Q/N-rich)-domain-bearing protein
	18632541	6.85	5.65	2.29	5.98e-05	0.0029	ceh-21	Homeobox protein ceh-21
	18456764	6.74	7.98	-2.37	6.01e-05	0.0029	F55H12.3	hypothetical protein
	18481512	6.48	5.38	2.14	6.05e-05	0.003	EEED8.3	hypothetical protein
	18534521	8.34	10.03	-3.22	6.16e-05	0.003	C30H6.5	hypothetical protein
	18553974	5.64	4.43	2.32	6.25e-05	0.003	K03D3.5	hypothetical protein
	18583083	6.03	7.33	-2.47	6.37e-05	0.0031	fut-8	Alpha-(1,6)-fucosyltransferase
	18453693	6.26	7.7	-2.71	6.46e-05	0.0031	D2092.8	hypothetical protein
	18539581	8.3	7.18	2.17	6.46e-05	0.0031	cyp-31A2	CYtochrome P450 family
	18616896	6.26	5.14	2.17	6.56e-05	0.0031	W06D11.1	hypothetical protein
	18516242	9.98	11.64	-3.16	6.67e-05	0.0031	col-88	COLlagen
	18543615	9.58	8.55	2.05	6.81e-05	0.0031	Y11D7A.7; Y11D7A.21	hypothetical protein; ncRNA
	18572914	10.2	9.15	2.08	6.82e-05	0.0031	apx-1	Anterior pharynx in excess protein 1
	18611772	7.1	8.11	-2.01	6.83e-05	0.0031	aman-1	Alpha-mannosidase
	18535009	5.7	7.44	-3.36	6.89e-05	0.0032	C42D4.2	hypothetical protein
	18558773	7.14	9.83	-6.44	7e-05	0.0032	col-137	COLlagen
	18556105	7.33	5.79	2.91	7.09e-05	0.0032	T12G3.6	hypothetical protein
	18631594	6.7	7.99	-2.46	7.12e-05	0.0032	T13G4.4	hypothetical protein
	18527794	6.7	5.43	2.42	7.15e-05	0.0032	best-17	Bestrophin homolog 17
	18576416	8.96	7.36	3.02	7.22e-05	0.0032	T21C9.13	hypothetical protein
	18562012	5.72	6.82	-2.13	7.31e-05	0.0033	C01G10.9	Methylthioribose-1-phosphate isomerase
	18570161	7.45	8.61	-2.23	7.3e-05	0.0033	F44G3.2	hypothetical protein
	18609313	7.68	6.37	2.47	7.48e-05	0.0033	F31B9.3	hypothetical protein
	18464655	5.39	6.54	-2.21	7.76e-05	0.0033	B0207.7	hypothetical protein
	18587205	5.27	4	2.42	7.73e-05	0.0033	F14H3.3	hypothetical protein
	18625274	7.87	8.91	-2.05	7.75e-05	0.0033	F36G3.2	hypothetical protein
	18625884	5.11	6.58	-2.77	7.79e-05	0.0033	nspc-9	Nematode Specific Peptide family, group C
	18577369	9.07	7.63	2.73	7.95e-05	0.0034	era-1	Embryonic mRna (mRNA) Anterior
	18472652	5.9	4.63	2.41	8.04e-05	0.0034	T04D3.5	hypothetical protein
	18494728	7.2	8.44	-2.36	8.08e-05	0.0034	C18H9.6	hypothetical protein
	18465269	5.2	6.8	-3.03	8.45e-05	0.0035	hsp-70	Heat Shock Protein
	18513001	10.82	9.71	2.15	8.56e-05	0.0035	zif-1	Zinc finger-interacting factor 1
	18583804	4.09	5.28	-2.28	8.73e-05	0.0036	C17E7.13	hypothetical protein
	18454859	5.97	7.28	-2.48	8.81e-05	0.0036	gpx-1	Glutathione peroxidase 1
	18515076	5.27	6.55	-2.43	8.91e-05	0.0036	T02C1.1	Uncharacterized RING finger protein T02C1.1
	18517141	10.35	9.11	2.36	9.04e-05	0.0036	Y39E4B.5	hypothetical protein
	18492165	7.77	5.51	4.82	9.11e-05	0.0036	ZK177.1	hypothetical protein
	18608934	4.82	6.12	-2.45	9.1e-05	0.0036	pgp-13	P-GlycoProtein related
	18626490	9.49	7.92	2.97	9.15e-05	0.0036	ipla-2	Intracelllar PhosphoLipase A family
	18586524	6.63	7.96	-2.52	9.19e-05	0.0036	F07C3.9	hypothetical protein
	18475973	8.19	7.07	2.17	9.26e-05	0.0037
	18467284	10.48	9.14	2.53	9.29e-05	0.0037	DY3.8	hypothetical protein
	18456630	6.71	7.86	-2.23	9.42e-05	0.0037	dhs-2	DeHydrogenases, Short chain
	18584177	10.12	9.06	2.09	9.45e-05	0.0037	mcm-3	DNA helicase
	18607450	5.93	6.98	-2.08	9.45e-05	0.0037	spin-3	SPINster (Drosophila lysosomal permease) homolog
	18475976	5.98	4.35	3.08	9.67e-05	0.0037
	18478443	8.86	6.77	4.25	9.81e-05	0.0038	C01G6.3	hypothetical protein
	18610456	5.02	6.17	-2.22	9.85e-05	0.0038	col-174	COLlagen
	18621016	5.59	7.06	-2.77	0.0001	0.0038	C34E11.2	hypothetical protein
	18459967	10.28	9.16	2.17	0.0001	0.0039	chs-1	CHitin Synthase
	18604953	8.39	9.65	-2.4	0.0001	0.0039	C29F7.2	hypothetical protein
	18615536	4.86	6.33	-2.76	0.0001	0.0039	col-168	COLlagen
	18527310	7.5	6.25	2.38	0.0001	0.0039	tbx-9	T-box transcription factor tbx-9
	18577743	8.65	9.8	-2.21	0.0001	0.0039	W07G4.5	hypothetical protein
	18499163	9.48	7.69	3.44	0.0001	0.004	F42A8.1	hypothetical protein
	18500156	9.33	8.26	2.1	0.0001	0.004	F54D5.9	hypothetical protein
	18582377	5.09	6.82	-3.3	0.0001	0.004	ugt-51	UDP-GlucuronosylTransferase
	18610335	6.18	4.69	2.82	0.0001	0.004	rgs-11	Regulator of G-protein signaling rgs-11
	18487429	7.39	8.46	-2.11	0.0001	0.004	R10H1.1	hypothetical protein
	18588358	4.53	3.53	2	0.0001	0.004	try-8	TRYpsin-like protease
	18570747	6.79	7.89	-2.14	0.0001	0.004	irg-3	Infection Response Gene
	18603967	7.21	8.35	-2.2	0.0001	0.004	C15C7.7	GDP-fucose protein O-fucosyltransferase 1
	18635099	4.37	6.87	-5.64	0.0001	0.004
	18524196	12.1	11.01	2.13	0.0001	0.004	sip-1	Stress-induced protein 1
	18513478	9.9	8.7	2.29	0.0001	0.0041	K03H1.7	hypothetical protein
	18612320	6.16	4.88	2.43	0.0001	0.0041	ttr-42	TransThyretin-Related family domain
	18571572	7.2	5.79	2.67	0.0001	0.0041	sta-2	Signal transducer and activator of transcription b
	18571800	5.28	6.41	-2.18	0.0001	0.0041	asp-8	ASpartyl Protease
	18537967	5.27	6.58	-2.49	0.0001	0.0041	clec-170	C-type LECtin
	18502108	4.4	6.28	-3.68	0.0001	0.0041	nas-23	Zinc metalloproteinase nas-23
	18605934	6.91	8.33	-2.67	0.0001	0.0041	trpp-12	TRansport Protein Particle
	18478235	5.74	4.71	2.04	0.0001	0.0042	B0457.14	ncRNA
	18577279	8.13	7.08	2.08	0.0001	0.0042	dgtr-1	DGAT (acyl-CoA:DiacylGlycerol AcylTransferase) Related
	18634523	6.18	5	2.26	0.0001	0.0042
	18634531	6.18	5	2.26	0.0001	0.0042
	18622280	6.46	7.6	-2.2	0.0001	0.0042	lgx-1	Lin-12 and Glp-1 X-hybridizing
	18518881	7.15	6.12	2.04	0.0001	0.0042	pqn-92	Prion-like-(Q/N-rich)-domain-bearing protein
	18635621	9.76	8.69	2.1	0.0001	0.0042
	18510209	4.75	3.16	3.02	0.0001	0.0043	C48B4.12	hypothetical protein
	18484287	8.12	9.59	-2.76	0.0001	0.0044
	18598838	7.87	9.22	-2.55	0.0001	0.0044	Y32F6B.1	Solute carrier organic anion transporter family member
	18599811	3.98	5.68	-3.25	0.0001	0.0044	hsp-16.2	Heat Shock Protein
	18490928	7.49	6.44	2.08	0.0001	0.0044	Y51H7C.3	hypothetical protein
	18506034	3.85	4.93	-2.12	0.0001	0.0044	Y53C12A.8	hypothetical protein
	18458967	9.13	7.96	2.26	0.0001	0.0045	T05F1.2	hypothetical protein
	18596532	9.69	8.66	2.05	0.0001	0.0045	dvc-1	SprT-like domain-containing protein Spartan
	18603902	6.05	7.19	-2.21	0.0001	0.0045	C15B12.1	Putative sarcosine oxidase
	18583384	8.13	7.02	2.16	0.0001	0.0045	C13G3.1	hypothetical protein
	18561523	7.12	5.07	4.13	0.0001	0.0045	nlp-29	Neuropeptide-like protein 29
	18595609	6.94	8.14	-2.3	0.0001	0.0045	T06E4.8	hypothetical protein
	18464574	8.04	6.56	2.78	0.0001	0.0046	B0205.13	hypothetical protein
	18528778	7.08	8.53	-2.72	0.0001	0.0046	cht-4	CHiTinase
	18487680	10.55	9.48	2.1	0.0001	0.0046	perm-1	PERMeable eggshell
	18599106	6.42	5.36	2.09	0.0001	0.0046	Y38H6C.23	hypothetical protein
	18472371	10.31	11.32	-2	0.0001	0.0046	R12E2.7	hypothetical protein
	18480253	6.29	7.32	-2.04	0.0001	0.0046	sma-6	Serine/threonine-protein kinase sma-6
	18595579	6.7	7.73	-2.05	0.0001	0.0047	T06E4.12	hypothetical protein
	18489229	8.02	9.14	-2.16	0.0002	0.0047	slc-36.2	SLC (SoLute Carrier) homolog
	18551829	8.69	7.24	2.73	0.0002	0.0047	trcs-1	TRansport of membrane to Cell Surface
	18516555	8.83	9.87	-2.06	0.0002	0.0048	Y119D3B.21	hypothetical protein
	18614769	7.92	9.02	-2.14	0.0002	0.0048	grd-14	GRounDhog (hedgehog-like family)
	18540716	9.48	10.64	-2.23	0.0002	0.0048	trx-3	ThioRedoXin [see also xtr]
	18575914	9.94	7.35	6.01	0.0002	0.0048	col-143	COLlagen
	18588557	5.76	6.76	-2	0.0002	0.0048	F26F12.4	hypothetical protein
	18598426	4.47	6.57	-4.31	0.0002	0.0049	Y113G7B.12	hypothetical protein
	18625444	5.81	6.94	-2.18	0.0002	0.0049	add-1	ADDucin
	18606641	5.33	6.55	-2.33	0.0002	0.0049	clec-86	C-type LECtin
	18633648	5.88	7.06	-2.27	0.0002	0.0049	ZC374.2	hypothetical protein
	18547578	9.44	7.02	5.37	0.0002	0.0049	ZK829.9	hypothetical protein
	18548067	4.62	5.82	-2.3	0.0002	0.0049	C01B10.10	hypothetical protein
	18557177	6.28	4.85	2.7	0.0002	0.0049	Y105C5A.8	hypothetical protein
	18574071	7.91	6.83	2.11	0.0002	0.0049	cnc-4	CaeNaCin (Caenorhabditis bacteriocin)
	18600143	7.05	5.4	3.13	0.0002	0.0049	ttr-26	TransThyretin-Related family domain
	18490903	9.74	10.81	-2.1	0.0002	0.005	Y51H7C.1	hypothetical protein
	18504941	7.36	6.17	2.28	0.0002	0.005	Y25C1A.14	hypothetical protein
	18579975	4.54	5.76	-2.33	0.0002	0.005	Y60A3A.23	hypothetical protein
	18591009	7.39	5.44	3.86	0.0002	0.005	F53F8.3	hypothetical protein
	18508574	6.73	7.8	-2.1	0.0002	0.005	bas-1	Biogenic Amine Synthesis related
	18543375	7.3	8.79	-2.82	0.0002	0.0051	Y105C5B.9	Phytanoyl-CoA dioxygenase domain-containing protein 1 homolog
	18465432	10.28	9.09	2.28	0.0002	0.0051	marc-3	MARCH (Membrane-Associated Ring finger (C3HC4)) homolog
	18541971	5.44	6.7	-2.39	0.0002	0.0052	T08B6.9	hypothetical protein
	18518039	7	5.79	2.31	0.0002	0.0052	Y53G8AR.10	ncRNA
	18452402	10.11	8.91	2.3	0.0002	0.0052	tyr-4	TYRosinase
	18593614	6.92	8.49	-2.97	0.0002	0.0052	M04C3.1	hypothetical protein
	18477880	11.7	10.55	2.21	0.0002	0.0053	mex-6	Zinc finger protein mex-6
	18452419	7.77	9.21	-2.71	0.0002	0.0053	pgp-2	P-GlycoProtein related
	18580166	11.25	9.94	2.48	0.0002	0.0053	col-42	COLlagen
	18565069	4.71	3.62	2.13	0.0002	0.0054	C49G7.6	hypothetical protein
	18569753	4.72	3.21	2.85	0.0002	0.0055	F40G12.11	hypothetical protein
	18631576	8.4	7.36	2.06	0.0002	0.0055	T13C5.6	hypothetical protein
	18627158	8.59	9.7	-2.17	0.0002	0.0055	F52H2.6	Diminuto-like protein
	18486634	7.12	8.17	-2.08	0.0002	0.0056	M02G9.2	hypothetical protein
	18550805	6.41	7.55	-2.2	0.0002	0.0056	ech-8	Enoyl-CoA Hydratase
	18580983	12.33	11	2.52	0.0002	0.0056	oma-2	hypothetical protein
	18608994	8.6	6.47	4.39	0.0002	0.0056	inx-3	Innexin-3
	18601623	5.92	7.03	-2.15	0.0002	0.0057	ugt-5	UDP-GlucuronosylTransferase
	18569790	6.07	7.17	-2.14	0.0002	0.0057	cyp-33C5	CYtochrome P450 family
	18630086	9.34	7.07	4.85	0.0002	0.0057	R04D3.3	hypothetical protein
	18572833	4.88	6.06	-2.27	0.0002	0.0058	cyp-35A5	CYtochrome P450 family
	18631811	6.7	8.09	-2.63	0.0002	0.0058	cdf-2	Cation Diffusion Facilitator family
	18507773	10.63	9.56	2.1	0.0002	0.0058	egg-1	EGG sterile (unfertilizable)
	18482757	6.85	5.54	2.48	0.0002	0.0059	F21H12.8	ncRNA
	18485826	6.38	7.9	-2.86	0.0002	0.0059	H41C03.3	hypothetical protein
	18623969	7.99	6.06	3.81	0.0002	0.0059	ent-5	Equilibrative Nucleoside Transporter
	18463813	7.8	6.41	2.62	0.0002	0.0059	ZC308.4	hypothetical protein
	18632868	5.12	6.35	-2.33	0.0002	0.006	W04G3.7	hypothetical protein
	18530423	6.29	7.44	-2.23	0.0003	0.006	Y66A7A.7	hypothetical protein
	18591013	8.8	7.72	2.11	0.0003	0.0061	F53F8.4	hypothetical protein
	18476995	5.49	6.53	-2.06	0.0003	0.0062	Y71G12B.33	hypothetical protein
	18535480	6.35	8.25	-3.75	0.0003	0.0062	C49A9.2	hypothetical protein
	18602897	9.11	7.43	3.19	0.0003	0.0063	C04B4.2	hypothetical protein
	18458596	9.23	7.77	2.76	0.0003	0.0063	cpg-3	Chondroitin proteoglycan 3
	18549389	10.21	9.12	2.12	0.0003	0.0063	C31H1.8	hypothetical protein
	18535524	5.14	6.21	-2.1	0.0003	0.0063	C49A9.5	hypothetical protein
	18548305	7.78	8.93	-2.22	0.0003	0.0063	C05C12.4	hypothetical protein
	18503866	5.61	4.55	2.09	0.0003	0.0064	T24E12.11	hypothetical protein
	18470307	6.62	4.8	3.51	0.0003	0.0064	fip-6	Fungus-Induced Protein
	18595810	8.97	10	-2.04	0.0003	0.0065	mtl-2	Metallothionein-2
	18630455	7.48	5.82	3.17	0.0003	0.0065	R09F10.8	hypothetical protein
	18599606	7.12	8.16	-2.06	0.0003	0.0065	Y43F8C.13	hypothetical protein
	18487986	6.99	5.32	3.17	0.0003	0.0065	T06D4.1	hypothetical protein
	18573349	5.51	7.1	-2.99	0.0003	0.0065	K11G9.2	Carboxylic ester hydrolase
	18568819	5.72	6.81	-2.13	0.0003	0.0065	F31F4.1	hypothetical protein
	18477265	8.35	9.39	-2.06	0.0003	0.0065	ZC247.1	hypothetical protein
	18454926	4.38	5.55	-2.24	0.0003	0.0065	uggt-2	UDP-Glucose Glycoprotein glucosylTransferase
	18625034	6.95	5.47	2.79	0.0003	0.0065	F31F6.2	hypothetical protein
	18523094	10.54	11.71	-2.24	0.0003	0.0066	col-91	Putative cuticle collagen 91
	18495548	5.98	4.79	2.28	0.0003	0.0066	C34F11.8	hypothetical protein
	18485000	12.44	11.39	2.06	0.0003	0.0066	puf-5	Pumilio domain-containing protein 5
	18548952	5.62	6.72	-2.14	0.0003	0.0066	C17H12.6	hypothetical protein
	18490151	5.76	4.67	2.12	0.0003	0.0069	sri-40	Serpentine Receptor, class I
	18595988	8.43	6.92	2.85	0.0003	0.0069	T10C6.7	hypothetical protein
	18454483	4.06	5.17	-2.16	0.0003	0.0069	gly-19	GLYcosylation related
	18515354	10.01	8.96	2.07	0.0003	0.0071	ttr-15	Transthyretin-like protein 15
	18458679	5.58	6.67	-2.12	0.0003	0.0071	R12E2.14	hypothetical protein
	18539740	6.36	7.49	-2.19	0.0003	0.0072	H20E11.3	hypothetical protein
	18597309	4.87	5.93	-2.08	0.0004	0.0072	oac-50	O-ACyltransferase homolog
	18545820	9.99	8.88	2.16	0.0004	0.0073	Y65A5A.2	hypothetical protein
	18452059	5.94	7.7	-3.38	0.0004	0.0073	nas-36	Zinc metalloproteinase nas-36
	18503640	3.92	5.43	-2.84	0.0004	0.0073	srh-70	Serpentine Receptor, class H
	18558601	9.47	8.46	2.01	0.0004	0.0073	fbxa-215	F-box A protein
	18473228	5.01	6.26	-2.38	0.0004	0.0076	T19B4.9	ncRNA
	18613758	8.53	9.67	-2.21	0.0004	0.0076	M153.1	hypothetical protein
	18458021	4.13	5.22	-2.13	0.0004	0.0076	K07G5.5	hypothetical protein
	18586308	5.18	6.29	-2.16	0.0004	0.0077	ttr-40	TransThyretin-Related family domain
	18542052	9.97	8.92	2.07	0.0004	0.0077	rme-2	Receptor Mediated Endocytosis
	18480101	9.16	8.07	2.12	0.0004	0.0077	szy-4	Suppressor of ZYg-1
	18490177	5.77	4.7	2.1	0.0004	0.0078	nspe-7	Nematode Specific Peptide family, group E
	18451963	6.48	5.29	2.27	0.0004	0.0079	acd-2	hypothetical protein
	18600842	4.02	5.22	-2.3	0.0004	0.0079	Y70C5A.3	hypothetical protein
	18578499	7.04	5.82	2.34	0.0004	0.008	Y37H2A.14	hypothetical protein
	18551788	11.65	10.54	2.15	0.0004	0.0081	gln-5	GLutamiNe synthetase (glutamate-ammonia ligase)
	18499362	9.93	8.86	2.11	0.0004	0.0081	egg-3	EGG sterile (unfertilizable)
	18576999	10.07	11.22	-2.22	0.0004	0.0082	hsp-16.48; hsp-16.49	Heat shock protein Hsp-16.48/Hsp-16.49
	18597334	10.07	11.22	-2.22	0.0004	0.0082
	18614569	8.75	10.11	-2.56	0.0004	0.0082	pqn-57; abu-9	Prion-like-(Q/N-rich)-domain-bearing protein; Activated in Blocked Unfolded protein response
	18562246	4.16	5.33	-2.24	0.0004	0.0082	C04E6.4	hypothetical protein
	18507167	3.87	5.01	-2.19	0.0004	0.0082	ZK250.13; math-47	hypothetical protein; pseudo
	18628851	9.3	10.42	-2.18	0.0004	0.0082	dao-3	Dauer or Aging adult Overexpression
	18595575	4.65	5.66	-2.02	0.0004	0.0082	T06E4.10	hypothetical protein
	18608266	7.29	8.61	-2.5	0.0004	0.0082	him-4	High Incidence of Males (increased X chromosome loss)
	18473582	7.84	6.63	2.31	0.0005	0.0083	T24D1.3	hypothetical protein
	18619236	7.78	9.22	-2.7	0.0005	0.0083	C05E7.2	hypothetical protein
	18457949	9.47	8.07	2.64	0.0005	0.0084	dut-1	DeoxyUTPase
	18526573	6.57	5.38	2.29	0.0005	0.0084	nth-1	Endonuclease III homolog
	18534767	5.51	6.63	-2.17	0.0005	0.0084	nas-8	Zinc metalloproteinase nas-8
	18465275	10.53	9.41	2.18	0.0005	0.0085	lin-41	Protein lin-41
	18482174	9.77	8.26	2.84	0.0005	0.0085	F13D12.3	hypothetical protein
	18465099	6.52	5.39	2.2	0.0005	0.0085	C06A5.12	hypothetical protein
	18549285	11.61	10.57	2.05	0.0005	0.0086	gln-6	GLutamiNe synthetase (glutamate-ammonia ligase)
	18559643	7.43	8.58	-2.23	0.0005	0.0086	hum-8	Heavy chain, Unconventional Myosin
	18509779	4.11	5.18	-2.1	0.0005	0.0086	cyp-25A1	CYtochrome P450 family
	18509439	4.37	5.87	-2.84	0.0005	0.0088	C29F9.2	hypothetical protein
	18515617	7.18	5.45	3.33	0.0005	0.0088	ttr-7	TransThyretin-Related family domain
	18492884	8.99	10.13	-2.2	0.0005	0.0089	B0286.3	Phosphoribosylaminoimidazole carboxylase
	18561075	5.08	6.13	-2.07	0.0005	0.0089	ZK616.65; ZK616.8	hypothetical protein
	18616982	6.89	8.6	-3.27	0.0005	0.0089	Y102A11A.3	hypothetical protein
	18510275	5.12	6.12	-2	0.0005	0.0091	C50C3.2	hypothetical protein
	18510464	6.18	7.32	-2.2	0.0005	0.0091	D2045.8	hypothetical protein
	18604439	6.13	7.42	-2.45	0.0005	0.0091	C23H4.7	Carboxylic ester hydrolase
	18598504	7.05	5.76	2.44	0.0005	0.0092	Y116F11B.17; linc-51	hypothetical protein; ncRNA
	18555537	5.05	6.72	-3.17	0.0005	0.0092	ant-1.4	Adenine Nucleotide Translocator
	18547375	5.28	6.88	-3.03	0.0005	0.0093	ZK616.61	hypothetical protein
	18491793	6.51	4.87	3.13	0.0005	0.0093	nos-2	NanOS related
	18549213	7.75	4.86	7.42	0.0005	0.0094	C27B7.9	hypothetical protein
	18508300	9.12	7.73	2.61	0.0005	0.0094	tyr-1	Putative tyrosinase-like protein tyr-1
	18576515	6.26	7.52	-2.39	0.0005	0.0094	lbp-7	Fatty acid-binding protein homolog 7
	18612646	9.23	10.26	-2.04	0.0006	0.0095	K01A12.4; M02D8.6	hypothetical protein
	18570591	12	10.98	2.03	0.0006	0.0095	pos-1	POsterior Segregation
	18558673	8.11	7.02	2.12	0.0006	0.0096	Y4C6A.3	hypothetical protein
	18501994	5.88	4.4	2.79	0.0006	0.0098	R07G3.12	ncRNA
	18604228	8.43	9.45	-2.03	0.0006	0.0099	C18A11.3	hypothetical protein
	18497767	11.48	10.37	2.16	0.0006	0.01	F18A1.7	hypothetical protein
	18575610	6.42	7.66	-2.37	0.0006	0.0102	clec-47	C-type LECtin
	18462462	9.23	7.92	2.48	0.0006	0.0102	Y52B11A.8	Phospholipase A2-like protein Y52B11A.8
	18573971	7.37	8.42	-2.08	0.0006	0.0104	R08E5.3	hypothetical protein
	18597011	9.63	8.33	2.47	0.0007	0.0104	gyg-2	GlYcoGenin like
	18519161	4.93	3.92	2.02	0.0007	0.0107	ZC21.10	hypothetical protein
	18465601	12.55	11.5	2.07	0.0007	0.0109	clec-87	C-type lectin domain-containing protein 87
	18542800	5.95	4.53	2.68	0.0007	0.011	pes-1	Patterned Expression Site
	18470777	4.55	5.56	-2.01	0.0007	0.0111	F56G4.7	hypothetical protein
	18493768	9.19	10.25	-2.08	0.0007	0.0111	nrf-6	Nose resistant to fluoxetine protein 6
	18533906	7.01	8.08	-2.09	0.0007	0.0111	C18H7.11	hypothetical protein
	18597424	4.51	3.35	2.24	0.0007	0.0111	T28B11.11	ncRNA
	18515298	10.75	9.66	2.13	0.0007	0.0111	rmd-1	Regulator of microtubule dynamics protein 1
	18599239	4.23	5.24	-2.02	0.0007	0.0113	Y39B6A.41	hypothetical protein
	18620622	6.86	4.65	4.63	0.0007	0.0113	C27C12.3	hypothetical protein
	18478064	7.03	8.84	-3.51	0.0008	0.0115	B0334.13	hypothetical protein
	18609707	8.3	9.55	-2.39	0.0008	0.0116	F38B6.4	hypothetical protein
	18515724	7.24	6.21	2.05	0.0008	0.0117	T20G5.8	hypothetical protein
	18552849	8.11	9.16	-2.08	0.0008	0.0117	F49C12.7	hypothetical protein
	18533665	6.53	8.51	-3.94	0.0008	0.0117	C10C5.4	Aminoacylase-1
	18517626	7.34	8.46	-2.17	0.0008	0.0119	Y47D3B.6	hypothetical protein
	18500470	5.64	4.54	2.14	0.0008	0.0119	F59A6.12	hypothetical protein
	18522410	9.71	8.55	2.23	0.0008	0.012	C44B9.3	hypothetical protein
	18607229	8.7	7.26	2.72	0.0008	0.0122	F02E8.4	hypothetical protein
	18487861	7.37	6.27	2.13	0.0008	0.0122	T05A7.1	hypothetical protein
	18517840	9.87	8.85	2.03	0.0008	0.0122	pie-1	Pharynx and intestine in excess protein 1
	18547573	5.97	4.95	2.03	0.0009	0.0122	tbx-36	Putative T-box protein 36
	18589942	9.09	10.11	-2.03	0.0009	0.0123	F41F3.3	hypothetical protein
	18481012	6.23	7.37	-2.19	0.0009	0.0123	C56C10.4	hypothetical protein
	18612929	7.68	5.51	4.5	0.0009	0.0123	K04C1.5	hypothetical protein
	18523225	5.51	6.62	-2.16	0.0009	0.0123	pqn-29	Prion-like-(Q/N-rich)-domain-bearing protein
	18544530	9.53	8.23	2.46	0.0009	0.0123	cyb-2.1	CYclin B
	18539180	5.77	7.34	-2.98	0.0009	0.0125	F56D5.6	hypothetical protein
	18613565	7.93	6.86	2.1	0.0009	0.0125
	18614327	5.91	7.05	-2.21	0.0009	0.0125	R07B1.9	hypothetical protein
	18598275	5.15	4.06	2.12	0.0009	0.0126	fbxa-206	F-box A protein
	18616284	5.84	7.24	-2.64	0.0009	0.0126	ram-5	hypothetical protein
	18614518	4.98	3.63	2.55	0.0009	0.0127	R09A8.1	hypothetical protein
	18618641	7.31	5.29	4.06	0.0009	0.0127	B0416.7	hypothetical protein
	18628474	10.32	8.17	4.45	0.0009	0.0127	meg-1	hypothetical protein
	18633509	8.73	6.87	3.65	0.0009	0.0128	Y75D11A.3	hypothetical protein
	18465488	8.39	7.26	2.19	0.001	0.013	hop-1	Presenilin hop-1
	18585304	11.12	10.1	2.04	0.001	0.0131	nasp-2	NASP (human Nuclear Autoantigenic Sperm Protein) homolog
	18451611	7.2	8.48	-2.44	0.0011	0.0141	ugt-26	UDP-glucuronosyltransferase
	18579402	7.24	8.68	-2.7	0.0011	0.0142
	18532482	6.11	4.83	2.43	0.0011	0.0143	puf-7	Pumilio domain-containing protein 7
	18477726	9.07	7.65	2.68	0.0011	0.0144	clec-91	C-type lectin domain-containing protein 91
	18594770	9.2	7.86	2.52	0.0011	0.0146	T01C3.3	hypothetical protein
	18456706	6.08	7.52	-2.71	0.0011	0.0146	F55D12.2	hypothetical protein
	18453942	6.25	7.66	-2.66	0.0012	0.0148	acox-2	Acyl-coenzyme A oxidase
	18621219	6.07	7.14	-2.11	0.0012	0.0148	C36B7.5	hypothetical protein
	18594927	6.8	7.8	-2	0.0012	0.0149	T02B11.8	hypothetical protein
	18526338	5.33	6.36	-2.04	0.0012	0.0149	R06B10.1	pseudo
	18474025	6.62	4.98	3.13	0.0012	0.0151	W03F11.1	hypothetical protein
	18518631	8.35	7.31	2.05	0.0012	0.0151	Y70G10A.3	Solute carrier organic anion transporter family member
	18561407	6.77	8	-2.35	0.0012	0.0151	ugt-49	UDP-glucuronosyltransferase
	18543022	9.04	7.38	3.15	0.0012	0.0152	grd-3	GRounDhog (hedgehog-like family)
	18499093	7.09	5.91	2.27	0.0012	0.0152	F41G3.10	hypothetical protein
	18549752	6.5	8.16	-3.16	0.0012	0.0154	col-131	COLlagen
	18632007	7.34	8.8	-2.75	0.0012	0.0154	pgp-6	P-GlycoProtein related
	18490377	9.61	8.44	2.25	0.0013	0.0158	spsb-2	SPSB (SPry and Socs Box) family
	18451764	5.98	6.99	-2.01	0.0013	0.016	C17D12.5	hypothetical protein
	18591323	6.35	7.54	-2.28	0.0013	0.0162	F56A4.13	ncRNA
	18526423	5.76	6.89	-2.19	0.0013	0.0162	nac-2	NADC (Na+-coupled dicarboxylate transporter) family
	18615377	8.1	6.82	2.43	0.0014	0.0162	ttr-30	TransThyretin-Related family domain
	18482652	4.3	3.1	2.29	0.0014	0.0163	F19B10.13	hypothetical protein
	18613096	5.44	6.56	-2.17	0.0014	0.0165	K07E3.9	hypothetical protein
	18501027	8.49	7.34	2.21	0.0014	0.0165	ptr-13	PaTched Related family
	18627010	8.11	5.87	4.72	0.0014	0.0167	rgs-8.2; rgs-8.1	Regulator of G protein Signaling
	18633269	8.11	5.87	4.72	0.0014	0.0167	rgs-8.2; rgs-8.1	Regulator of G protein Signaling
	18511984	5.68	7.35	-3.18	0.0014	0.0168	F43C1.5	hypothetical protein
	18633429	10.23	9.18	2.08	0.0014	0.0168	Y73B3A.1	hypothetical protein
	18573687	4.39	6.29	-3.71	0.0015	0.017	clec-258	C-type LECtin
	18635165	6.34	7.38	-2.06	0.0015	0.017
	18493664	8.23	9.25	-2.03	0.0015	0.0173	nas-7	Zinc metalloproteinase nas-7
	18559581	4.9	5.94	-2.06	0.0015	0.0173	Y62E10A.3	hypothetical protein
	18536635	4.73	5.78	-2.07	0.0015	0.0174	F13B12.3	hypothetical protein
	18475388	7.46	8.64	-2.25	0.0016	0.0176	fpn-1.1	FerroPortiN
	18484714	5.4	6.6	-2.3	0.0016	0.0176	F49E12.10	hypothetical protein
	18535969	7.87	9.07	-2.31	0.0016	0.0176	atic-1	5-Aminoimidazole-4-carboxamide ribonucleotide formylTransferase/IMP Cyclohydrolase homolog
	18575917	4.95	3.95	2	0.0016	0.0177	col-142	COLlagen
	18630851	4.79	5.96	-2.26	0.0016	0.0178	lyst-1	LYSosomal Trafficking regulator protein
	18485564	7.36	8.52	-2.24	0.0016	0.0181	F59B10.3	hypothetical protein
	18452187	7.12	8.34	-2.33	0.0016	0.0181	C30F8.3	hypothetical protein
	18462128	8.22	7.04	2.26	0.0017	0.0183	dnj-27	DNaJ domain (prokaryotic heat shock protein)
	18561519	6.49	4.28	4.61	0.0017	0.0187	nlp-28	GMYGGW-amide
	18542134	5.88	4.87	2	0.0017	0.0189	T12B3.2	hypothetical protein
	18550966	9.79	10.82	-2.04	0.0017	0.019	col-130	COLlagen
	18566806	6.01	4.69	2.49	0.0018	0.0191	clec-7	C-type LECtin
	18588591	9.37	10.46	-2.13	0.0018	0.0193	F26F2.10	hypothetical protein
	18572738	8.07	9.31	-2.36	0.0018	0.0194	K07C11.4	Carboxylic ester hydrolase
	18584927	6.72	5.21	2.86	0.0018	0.0195	nas-9	Zinc metalloproteinase nas-9
	18589038	9.2	7.92	2.43	0.0019	0.0198	F32D1.7	hypothetical protein
	18529744	8.43	7.38	2.07	0.0019	0.0199	Y48A6B.7	hypothetical protein
	18552569	6.21	7.24	-2.05	0.0019	0.02	F42A9.7	Major sperm protein
	18484745	7.96	9.02	-2.08	0.0019	0.0201	efl-3	E2F-like (mammalian transcription factor)
	18492063	8.5	7.45	2.07	0.0019	0.0202	ZK1307.9	Coiled-coil domain-containing protein 130 homolog
	18608737	7.2	6.09	2.15	0.002	0.0205	F19H6.4	hypothetical protein
	18617799	6.8	5.61	2.29	0.0021	0.021	rgs-9	Regulator of G-protein signaling rgs-9
	18532652	10.36	9.27	2.13	0.0021	0.0212	B0513.4	hypothetical protein
	18606538	6.53	5.49	2.05	0.0021	0.0212	C53B7.3	hypothetical protein
	18494465	7.39	6.39	2.01	0.0021	0.0213	fbxc-50	F-box C protein
	18580503	5.99	4.78	2.31	0.0022	0.0221	ZC116.1	hypothetical protein
	18516420	4.81	3.66	2.22	0.0022	0.0224	Y111B2A.2	hypothetical protein
	18497783	8.67	7.66	2	0.0023	0.0228	puf-6	Pumilio domain-containing protein 6
	18491324	8.5	7.49	2.01	0.0023	0.0228	Y54G9A.5	hypothetical protein
	18605145	4.92	3.84	2.12	0.0023	0.0229	C33D3.3	hypothetical protein
	18555159	6.22	7.26	-2.06	0.0023	0.023	R09E10.1	hypothetical protein
	18553946	6.73	5.09	3.11	0.0024	0.0234	col-101	COLlagen
	18559494	7.2	8.26	-2.09	0.0024	0.0234	Y59H11AR.4	hypothetical protein
	18582900	4.91	3.87	2.06	0.0024	0.0235	C07G3.13	ncRNA
	18618956	5.45	6.73	-2.42	0.0026	0.0243	C03F11.2	hypothetical protein
	18588486	4.15	5.2	-2.07	0.0026	0.0247	F26D2.10	hypothetical protein
	18499749	8.28	6.99	2.45	0.0026	0.0249	skpo-1	Peroxidase skpo-1
	18632278	6.22	7.35	-2.19	0.0028	0.0258	T23F2.2	hypothetical protein
	18463342	2.77	4.84	-4.2	0.0028	0.0259	Y71G12B.18	hypothetical protein
	18511622	5.39	6.66	-2.41	0.0029	0.0263	F37A4.4	Ankyrin repeat-containing protein F37A4.4
	18584527	7	5.75	2.39	0.0029	0.0265	C31B8.8	hypothetical protein
	18500849	6.3	7.36	-2.09	0.003	0.0268	ltd-1	Lim and Transglutaminase Domain
	18453979	5.73	4.61	2.17	0.003	0.027	F08A8.9	ncRNA
	18597331	10.7	11.7	-2	0.0031	0.0276	hsp-16.1; hsp-16.11	Heat shock protein Hsp-16.1/Hsp-16.11
	18609505	7.93	9.3	-2.58	0.0032	0.0282	abu-10	Activated in Blocked Unfolded protein response
	18476848	8.51	7.39	2.16	0.0033	0.0287	Y71F9B.13	hypothetical protein
	18537574	7.79	9.15	-2.57	0.0033	0.0287	itr-1	Inositol 1,4,5-trisphosphate receptor itr-1
	18629818	7.67	8.85	-2.28	0.0035	0.0298	R02E4.3	hypothetical protein
	18536786	6.43	4.91	2.87	0.0036	0.0303
	18500494	7.28	6.11	2.25	0.0036	0.0304	F59B10.4	hypothetical protein
	18576441	6.18	7.23	-2.08	0.0037	0.0307	T21C9.6	hypothetical protein
	18586361	3.68	5.13	-2.73	0.0037	0.0307	EGAP9.3	hypothetical protein
	18477914	5.79	4.58	2.32	0.0039	0.0318	B0228.1	hypothetical protein
	18613693	6.75	7.78	-2.04	0.0041	0.0328	M03A8.3	hypothetical protein
	18531521	8.33	9.5	-2.25	0.0041	0.0328	col-97	COLlagen
	18512081	4.88	6.09	-2.32	0.0042	0.0335	nas-1	Zinc metalloproteinase nas-1
	18484850	6.38	4.95	2.7	0.0043	0.0341	F53C3.5	hypothetical protein
	18615192	9.41	10.46	-2.07	0.0044	0.0346	ttr-14	TransThyretin-Related family domain
	18575986	8.28	9.36	-2.11	0.0044	0.0347	T16G1.2	hypothetical protein
	18561144	5.04	6.62	-2.98	0.0045	0.0351	lips-6	LIPaSe related
	18618266	10.5	8.69	3.5	0.0045	0.0354	ZK813.7	hypothetical protein
	18627057	6.95	5.6	2.55	0.0046	0.0359	F52E4.5	hypothetical protein
	18494823	5.41	4.37	2.07	0.0046	0.036	C25H3.10	hypothetical protein
	18590783	4.91	6.05	-2.21	0.0046	0.036	oac-32	O-ACyltransferase homolog
	18528139	6.74	5.72	2.02	0.0048	0.037	T24C4.5	DNA primase
	18526666	6.91	5.84	2.09	0.0049	0.0372	ttr-8	TransThyretin-Related family domain
	18619185	8.6	7.3	2.47	0.005	0.0377	C05D9.9	hypothetical protein
	18549953	7.2	8.39	-2.28	0.005	0.0377	bicd-1	BICaudal D (Drosophila) homolog
	18565042	3.81	5.04	-2.34	0.005	0.0379	C49G7.12	hypothetical protein
	18628595	8.81	7.77	2.07	0.005	0.038	aqp-8	AQuaPorin or aquaglyceroporin related
	18496970	4.39	5.45	-2.09	0.005	0.0381	F07F6.10	ncRNA
	18488327	9.14	8.1	2.05	0.0051	0.0382	gpd-1	Glyceraldehyde-3-phosphate dehydrogenase 1
	18538408	5.36	6.76	-2.64	0.0052	0.0388	F44D12.16	hypothetical protein
	18582801	6.47	7.48	-2.02	0.0054	0.0398	C06B8.2	hypothetical protein
	18477920	6.52	7.7	-2.27	0.0055	0.0404	cpna-2	Copine family protein 2
	18522471	6.67	4.92	3.37	0.0056	0.041	C45G9.12	hypothetical protein
	18546659	4.72	6.2	-2.8	0.0057	0.0414	pqn-91	Prion-like-(Q/N-rich)-domain-bearing protein
	18580842	8.94	7.89	2.06	0.0057	0.0416
	18561500	5.75	7.19	-2.71	0.0058	0.0423	B0024.4	hypothetical protein
	18565856	3.19	5	-3.52	0.0059	0.0425	D1014.6	hypothetical protein
	18563438	6.08	4.98	2.14	0.006	0.043	C17E7.4	hypothetical protein
	18619108	5.23	7.33	-4.3	0.0064	0.045	pgp-5	P-GlycoProtein related
	18618252	6.93	5.14	3.46	0.0064	0.0454	ZK813.2	hypothetical protein
	18451818	6.97	8.2	-2.35	0.0067	0.0466	C17F3.3	hypothetical protein
	18563353	5.91	4.75	2.23	0.0068	0.0467	C16D9.1	hypothetical protein
	18572509	7.12	8.2	-2.11	0.0069	0.0474	swt-5	SWEET sugar transporter family
	18513398	4.85	3.82	2.04	0.0071	0.0482	K02F3.13	ncRNA
	18619451	7.71	6.35	2.57	0.0072	0.0487	C09B8.4	hypothetical protein
	18512437	5.22	4.14	2.12	0.0072	0.049	F54C4.6	ncRNA
	18538940	8.36	7.06	2.45	0.0073	0.0492	F55B11.3	hypothetical protein
